# Supplementary material for: Evolutionary convergence of a neural mechanism in the cavefish lateral line system
Source: eLife. 2022 Jun 16;11:e77387. doi: 10.7554/eLife.77387 (PMC9246366; doi:10.7554/eLife.77387)
Supplement: Supplementary file 1. — Afferent spike rate during motor inactivity, fictive swimming, and neuromast deflection. Data include information related to the parameters of fictive swim bouts (i.e., tail-beat frequency, swim duration, and duty cycle) as well as stimulus frequency associated with evoked activity. Imaging data denote the population (Pachón or surface), age, and neuromast identity associated with each hair cell count. [file elife-77387-supp1.xlsx]

## Sheet: Surface
Fish ID	Age (dpf)	Swim Duration (s)	Swim Frequency (Hz)	Swim Duty Cycle	Aff Spike Rate-pre	Aff Spike Rate-swim	Aff Spike Rate-post	Refractory Period (s)	Spike Number-pre	Spike Number-swim
5	7	0.2723	18.3621	0.0890562	11.0173	0	0	0.1686	3	0
5	7	0.2304	21.7014	0.0844184	34.7222	0	60.7639	0.1539	8	0
5	7	0.39235	22.9387	0.121575	33.1337	0	53.5236	0.18285	13	0
5	7	0.2789	21.5131	0.112406	32.2696	0	46.6117	0.13985	9	0
5	7	0.29485	20.3493	0.113448	33.9156	0	61.048	0.1321	10	0
5	7	0.5529	16.2778	0.0536263	41.5988	18.0865	65.1112	0.0027	23	10
5	7	0.17	23.5294	0.0991176	52.9412	0	11.7647	0.1378	9	0
5	7	0.22755	21.9732	0.0659196	48.341	0	8.78928	0.1675	11	0
5	7	0.1183	25.3593	0.0494505	8.45309	0	0	0.2291	1	0
5	7	0.21845	22.8885	0.120165	27.4662	0	45.7771	0.0752	6	0
5	7	0.179	22.3464	0.0620112	5.58659	0	11.1732	0.16685	1	0
5	7	0.18205	21.972	0.0985993	21.972	0	16.479	0.11605	4	0
5	7	0.12055	24.8859	0.0340108	41.4766	0	8.29531	0.0486	5	0
5	7	0.22835	21.8962	0.10116	17.517	0	43.7924	0.13295	4	0
5	7	0.4098	14.6413	0.0269644	39.0434	21.9619	70.7662	0.00225	16	9
5	7	0.2251	22.2124	0.0859618	0	0	53.3096	0.11145	0	0
5	7	0.21885	22.8467	0.0929861	22.8467	0	31.9854	0.11595	5	0
5	7	0.122	24.5902	0.0618852	24.5902	0	0	0.20155	3	0
5	7	0.18245	16.4429	0.0128802	54.8095	0	32.8857	0.1266	10	0
5	7	0.18235	21.9358	0.106115	27.4198	0	5.48396	0.1415	5	0
5	7	0.22705	22.0216	0.120458	8.80863	0	39.6388	0.14245	2	0
5	7	0.1686	23.7248	0.0492289	23.7248	0	0	0.23485	4	0
5	7	0.22735	13.1955	0.0508027	21.9925	0	21.9925	0.07165	5	0
5	7	0.17725	22.567	0.0265162	39.4922	0	16.9252	0.1494	7	0
5	7	0.17095	23.3987	0.0529395	0	0	5.84966	0.0787	0	0
5	7	0.17305	23.1147	0.0361167	34.6721	0	0	0.1782	6	0
5	7	0.1625	24.6154	0.0750769	49.2308	0	6.15385	0.1119	8	0
5	7	0.11635	25.7843	0.0537172	17.1895	0	25.7843	0.00265	2	0
5	7	0.22095	13.5777	0.0153881	54.3109	0	36.2073	0.14555	12	0
5	7	0.1167	34.2759	0.0514139	17.138	0	0	0.19225	2	0
5	7	0.11965	25.0731	0.0480568	8.35771	0	0	0.1779	1	0
5	7	0.1177	25.4885	0.0356839	8.49618	0	0	0.19445	1	0
5	7	0.16505	18.1763	0.0205998	36.3526	0	12.1175	0.11275	6	0
5	7	0.11045	27.1616	0.056134	27.1616	0	0	0.1519	3	0
5	7	0.10745	27.92	0.0623546	0	0	0	0.1279	0	0
5	7	0.1656	18.1159	0.0123792	48.3092	0	36.2319	0.10535	8	0
5	7	0.17245	23.1951	0.0289939	57.9878	0	11.5976	0.15615	10	0
5	7	0.22065	18.1283	0.0231135	18.1283	0	54.3848	0.12235	4	0
5	7	0.11535	26.0078	0.0845254	26.0078	0	0	0.1657	3	0
5	7	0.16705	17.9587	0.0185573	11.9725	0	0	0.1832	2	0
5	7	0.11645	25.7621	0.104766	25.7621	0	0	0.2026	3	0
5	7	0.1129	26.5722	0.0270151	0	0	0	0.18335	0	0
5	7	0.22525	17.758	0.045505	35.5161	0	26.6371	0.13815	8	0
5	7	0.11385	26.3505	0.109354	8.78349	0	0	0.1692	1	0
5	7	0.1148	26.1324	0.054007	43.554	0	0	0.20645	5	0
5	7	0.11295	26.5604	0.0712705	0	0	0	0.16965	0	0
5	7	0.2189	18.2732	0.0203289	13.7049	4.5683	22.8415	0.17245	3	1
5	7	0.10545	28.4495	0.0587956	18.9663	0	0	0.1973	2	0
5	7	0.3067	13.0421	0.025106	16.3026	3.26052	52.1682	0.1504	5	1
5	7	0.16615	18.056	0.00481493	6.01866	0	42.1306	0.0834	1	0
5	7	0.2152	23.2342	0.0810874	41.8216	4.64684	27.881	0.14205	9	1
5	7	0.1121	26.7618	0.0561998	35.6824	0	0	0.1282	4	0
5	7	0.27385	21.9098	0.108636	58.4261	3.65163	47.4712	0.1533	16	1
5	7	0.28925	20.7433	0.123941	34.5722	0	55.3155	0.13445	10	0
5	7	0.22625	22.0994	0.0877348	39.779	0	39.779	0.10995	9	0
5	7	0.22285	22.4366	0.0744896	49.3606	0	31.4113	0.0466	11	0
5	7	0.1735	23.0548	0.0930836	34.5821	0	0	0.19395	6	0
5	7	0.1161	25.8398	0.0835487	0	0	0	0.1238	0	0
5	7	0.3721	18.8121	0.0592583	37.6243	0	69.8737	0.10685	14	0
5	7	0.2362	21.1685	0.0700677	29.6359	0	46.5707	0.10325	7	0
5	7	0.2406	20.7814	0.0766833	37.4065	0	29.0939	0.1151	9	0
5	7	0.2162	18.5014	0.0228955	23.1267	0	23.1267	0.1213	5	0
5	7	0.28395	21.1305	0.128192	17.6087	0	42.261	0.1358	5	0
5	7	0.172	23.2558	0.0848837	17.4419	0	0	0.2186	3	0
5	7	0.32645	21.4428	0.0765814	27.5693	0	45.9488	0.0714	9	0
5	7	0.22125	22.5989	0.119096	22.5989	0	27.1186	0.1367	5	0
5	7	0.16585	24.1182	0.100995	30.1477	0	18.0886	0.14395	5	0
5	7	0.24765	20.1898	0.101555	52.4934	0	44.4175	0.02925	13	0
5	7	0.5135	13.6319	0.105258	35.0536	7.78968	62.3174	0.0062	18	4
5	7	0.5006	13.9832	0.163304	43.9473	25.9688	65.9209	0.0073	22	13
5	7	0.1435	27.8746	0.118467	41.8118	0	20.9059	0.1219	6	0
5	7	0.1221	24.57	0.0634726	40.95	0	8.19001	0.082	5	0
5	7	0.11935	25.1362	0.0603268	0	0	0	0.1949	0	0
5	7	0.27195	22.0629	0.10866	18.3857	0	40.4486	0.1471	5	0
5	7	0.2775	21.6216	0.076036	36.036	0	50.4505	0.09505	10	0
5	7	0.1947	20.5444	0.0724191	30.8166	0	46.225	0.11645	6	0
5	7	0.23275	21.4823	0.0650913	30.0752	0	30.0752	0.1492	7	0
5	7	0.174	28.7356	0.0465517	40.2299	0	0	0.1857	7	0
5	7	0.1958	20.429	0.142237	25.5363	0	5.10725	0.193	5	0
5	7	0.3313	18.1105	0.119378	45.2762	6.03682	57.3498	0.08365	15	2
5	7	0.1829	21.8699	0.119464	32.8048	0	10.9349	0.111	6	0
5	7	0.17855	22.4027	0.0389247	33.604	0	11.2013	0.12885	6	0
5	7	0.1254	23.9234	0.0861244	23.9234	0	0	0.21265	3	0
5	7	0.11335	26.4667	0.0569034	8.82223	0	0	0.1702	1	0
5	7	0.17565	22.7726	0.125818	62.6245	0	17.0794	0.1343	11	0
5	7	0.2411	20.7383	0.0995438	29.0336	0	74.6578	0.0217	7	0
5	7	0.1145	26.2009	0.071179	17.4672	0	0	0.16675	2	0
5	7	0.29625	20.2532	0.107848	40.5063	0	40.5063	0.1055	12	0
5	7	0.2925	20.5128	0.102735	47.8632	0	44.4444	0.09875	14	0
5	7	0.13075	22.9446	0.0531549	15.2964	0	0	0.2207	2	0
5	7	0.23565	21.2179	0.164014	21.2179	0	46.6794	0.1067	5	0
5	7	0.2657	22.5819	0.146406	30.1091	0	48.9274	0.1287	8	0
5	7	0.2212	22.604	0.132911	18.0832	0	31.6456	0.15445	4	0
5	7	0.2344	25.5973	0.0962031	25.5973	0	46.9283	0.1348	6	0
5	7	0.2386	20.9556	0.0987008	16.7645	0	46.1023	0.0998	4	0
5	7	0.17405	22.9819	0.121804	28.7274	0	17.2364	0.1517	5	0
5	7	0.169	23.6686	0.0698225	35.503	0	11.8343	0.14665	6	0
5	7	0.1137	26.3852	0.0905893	0	0	0	0.1809	0	0
5	7	0.21715	18.4204	0.0815105	18.4204	0	41.446	0.1387	4	0
5	7	0.1686	23.7248	0.0415184	35.5872	0	29.656	0.1252	6	0
5	7	0.21415	23.3481	0.0889563	0	4.66962	32.6874	0.1446	0	1
5	7	0.23225	21.5285	0.0665231	0	0	55.9742	0.1063	0	0
5	7	0.28325	17.6523	0.0774934	42.3654	0	49.4263	0.12545	12	0
5	7	0.2197	22.7583	0.118343	40.965	0	36.4133	0.1375	9	0
5	7	0.268	22.3881	0.132836	41.0448	0	55.9701	0.0707	11	0
5	7	0.19385	20.6345	0.109879	25.7931	0	25.7931	0.15055	5	0
5	7	0.23115	21.631	0.107506	17.3048	0	34.6096	0.11335	4	0
5	7	0.2285	21.8818	0.111816	21.8818	0	52.5164	0.1196	5	0
5	7	0.1729	23.1348	0.075188	23.1348	0	5.78369	0.16065	4	0
5	7	0.1777	22.5098	0.118739	22.5098	0	16.8824	0.121	4	0
5	7	0.2306	21.6826	0.0726366	47.7016	0	39.0286	0.1303	11	0
5	7	0.2312	21.6263	0.130407	30.2768	0	43.2526	0.1207	7	0
5	7	0.2254	22.1828	0.130657	39.929	0	35.4925	0.14725	9	0
5	7	0.1593	25.1099	0.0772128	6.27746	0	0	0.1746	1	0
5	7	0.4498	13.3393	0.0171187	31.1249	13.3393	64.4731	0.0073	14	6
5	7	0.39	15.3846	0.0888462	46.1538	2.5641	53.8462	0.18145	18	1
5	7	0.17905	22.3401	0.168668	39.0952	0	22.3401	0.11075	7	0
5	7	0.19875	15.0943	0.0535849	5.03145	0	0	0.23075	1	0
5	7	0.2853	17.5254	0.0860498	28.0407	0	59.5864	0.0722	8	0
5	7	0.2195	22.779	0.119134	31.8907	0	41.0023	0.14085	7	0
5	7	0.22695	22.0313	0.0484688	39.6563	0	30.8438	0.13735	9	0
5	7	0.22765	13.1781	0.0647924	8.78542	0	48.3198	0.09545	2	0
5	7	0.33975	14.7167	0.0481236	73.5835	8.83002	44.1501	0.1476	25	3
5	7	0.21545	23.2072	0.105593	18.5658	0	46.4145	0.1175	4	0
5	7	0.45745	15.3022	0.0840529	59.0228	15.3022	52.4648	0.01265	27	7
5	7	0.2185	22.8833	0.093135	18.3066	0	22.8833	0.1402	4	0
5	7	0.1709	23.4055	0.109713	29.2569	0	5.85138	0.16155	5	0
5	7	0.17495	22.8637	0.13661	45.7274	0	0	0.19315	8	0
5	7	0.3269	21.4133	0.151575	18.3542	0	67.2989	0.07445	6	0
5	7	0.2509	23.9139	0.0520128	39.8565	0	43.8422	0.1269	10	0
5	7	0.21935	22.7946	0.0756781	41.0303	0	31.9125	0.14185	9	0
5	7	0.3509	11.3993	0.0354802	62.6959	8.54944	45.597	0.1185	22	3
5	7	0.1158	25.9067	0.0103627	17.2712	0	0	0.22275	2	0
5	7	0.22295	22.4266	0.071765	31.3972	0	35.8825	0.1314	7	0
5	7	0.3906	15.361	0.0915259	25.6016	17.9211	58.8838	0.0002	10	7
5	7	0.51785	13.5174	0.071063	34.7591	1.93106	57.9318	0.1594	18	1
5	7	0.27665	21.6881	0.0827761	21.6881	0	57.8348	0.09745	6	0
5	7	0.34635	20.2108	0.114191	20.2108	2.88725	51.9706	0.1086	7	1
5	7	0.22765	21.9635	0.0689655	8.78542	0	35.1417	0.17075	2	0
5	7	0.28075	21.3713	0.0552093	35.6189	0	56.9902	0.0199	10	0
5	7	0.1805	22.1607	0.119668	22.1607	0	5.54017	0.15655	4	0
5	7	0.27665	21.6881	0.107537	28.9174	0	46.9908	0.1125	8	0
5	7	0.2273	21.9974	0.0811703	35.1958	0	26.3968	0.16375	8	0
5	7	0.1789	22.3589	0.0427613	50.3074	0	22.3589	0.0879	9	0
5	7	0.1683	23.7671	0.100713	35.6506	0	35.6506	0.0726	6	0
5	7	0.1776	22.5225	0.0914977	95.7207	0	22.5225	0.1528	17	0
5	7	0.26645	22.5183	0.0983299	56.2957	0	56.2957	0.0557	15	0
5	7	0.27665	21.6881	0.108079	28.9174	3.61468	32.5321	0.13615	8	1
5	7	0.2288	21.8531	0.0828234	17.4825	0	21.8531	0.148	4	0
5	7	0.32415	18.5099	0.0923955	18.5099	0	58.6148	0.0553	6	0
5	7	0.1142	26.2697	0.0599825	43.7828	0	0	0.1917	5	0
5	7	0.26375	18.9573	0.0394313	34.1232	0	49.2891	0.0934	9	0
5	7	0.21785	22.9516	0.0970852	0	0	32.1322	0.1039	0	0
5	7	0.22545	17.7423	0.0445775	17.7423	0	35.4846	0.0905	4	0
5	7	0.11155	26.8938	0.0380995	53.7875	0	0	0.2331	6	0
5	7	0.2194	22.7894	0.123747	45.5789	0	36.4631	0.1101	10	0
5	7	0.1798	22.2469	0.118187	16.6852	0	22.2469	0.13415	3	0
5	7	0.27195	18.3857	0.122449	44.1258	0	47.8029	0.09805	12	0
5	7	0.2271	22.0167	0.0808014	30.8234	0	48.4368	0.1102	7	0
5	7	0.2775	21.6216	0.0868468	36.036	0	50.4505	0.09165	10	0
5	7	0.2173	23.0097	0.0678785	23.0097	0	23.0097	0.18045	5	0
5	7	0.2275	21.978	0.116484	4.3956	0	43.956	0.05155	1	0
5	7	0.2266	22.0653	0.128641	17.6523	0	26.4784	0.14665	4	0
5	7	0.2221	22.5124	0.111436	22.5124	0	36.0198	0.147	5	0
5	7	0.22125	22.5989	0.0910734	9.03955	0	31.6384	0.14565	2	0
5	7	0.2132	23.4522	0.123358	42.2139	0	14.0713	0.14025	9	0
5	7	0.2756	14.5138	0.0299347	36.2845	0	72.5689	0.07965	10	0
5	7	0.21615	23.1321	0.0758732	27.7585	0	46.2642	0.1313	6	0
5	7	0.22825	21.9058	0.0976999	43.8116	0	48.1928	0.09825	10	0
5	7	0.35405	14.1223	0.0556419	19.7712	14.1223	70.6115	0.01905	7	5
5	7	0.161	24.8447	0.0860248	24.8447	0	6.21118	0.1205	4	0
5	7	0.10975	27.3349	0.0651481	0	0	0	0.1513	0	0
5	7	0.33	21.2121	0.0480303	21.2121	0	84.8485	0.08355	7	0
5	7	0.2166	23.084	0.110111	87.7193	0	64.6353	0.05855	19	0
5	7	0.1688	23.6967	0.120853	11.8483	0	17.7725	0.0836	2	0
5	7	0.16605	24.0891	0.0569106	12.0446	0	30.1114	0.0139	2	0
5	7	0.10755	27.894	0.0455602	0	0	0	0.1466	0	0
5	7	0.48	16.6667	0.0969792	10.4167	0	70.8333	0.09745	5	0
5	7	0.26745	26.1731	0.108618	29.9121	0	52.3462	0.0793	8	0
5	7	0.22615	22.1092	0.045545	35.3748	0	26.5311	0.1561	8	0
5	7	0.1718	23.2829	0.0291036	17.4622	0	5.82072	0.15725	3	0
5	7	0.36895	16.2624	0.0421466	18.9728	0	70.4703	0.0375	7	0
5	7	0.37635	13.2855	0.0413179	39.8565	13.2855	66.4275	0.0072	15	5
5	7	0.2144	23.3209	0.109142	27.9851	0	37.3134	0.06035	6	0
5	7	0.21835	22.899	0.0973208	9.15961	0	36.6384	0.13085	2	0
5	7	0.1625	24.6154	0.162462	18.4615	0	0	0.1686	3	0
5	7	0.2164	23.1054	0.0762477	18.4843	4.62107	46.2107	0.15035	4	1
5	7	0.16525	24.2057	0.0928896	18.1543	0	0	0.1882	3	0
5	7	0.1185	25.3165	0.0400844	0	0	0	0.185	0	0
5	7	0.1688	23.6967	0.0556872	0	0	0	0.1738	0	0
5	7	0.2046	24.4379	0.0635386	4.88759	0	19.5503	0.1809	1	0
5	7	0.2101	23.7982	0.0904331	33.3175	0	47.5964	0.0847	7	0
5	7	0.2157	23.1803	0.103153	18.5443	0	32.4525	0.1322	4	0
5	7	0.1685	23.7389	0.0489614	53.4125	0	0	0.19505	9	0
5	7	0.16605	24.0891	0.0346281	6.02228	0	6.02228	0.1411	1	0
5	7	0.1763	22.6886	0.101815	17.0164	0	22.6886	0.10445	3	0
5	7	0.16825	23.7741	0.0921248	41.6048	0	35.6612	0.1097	7	0
5	7	0.2631	22.805	0.102052	22.805	0	57.0125	0.1137	6	0
5	7	0.22155	22.5683	0.0722185	36.1092	0	40.6229	0.10145	8	0
5	7	0.4328	18.4843	0.134242	20.7948	2.31054	69.3161	0.003	9	1
5	7	0.217	23.0415	0.105069	41.4747	0	36.8664	0.12655	9	0
5	7	0.22885	17.4787	0.0183526	39.3271	0	43.6967	0.11305	9	0
5	7	0.11565	25.9403	0.07393	34.5871	0	0	0.17835	4	0
5	7	0.10495	28.585	0.0800381	19.0567	0	0	0.211	2	0
5	7	0.21585	23.1642	0.0792217	37.0628	0	41.6956	0.12125	8	0
5	7	0.17085	23.4124	0.0769681	40.9716	0	35.1185	0.05565	7	0
5	7	0.25855	19.3386	0.0990137	46.4127	0	61.8836	0.03585	12	0
5	7	0.22685	22.041	0.0868415	22.041	0	44.082	0.11855	5	0
5	7	0.1781	22.4593	0.0533408	33.6889	0	16.8445	0.15345	6	0
5	7	0.215	23.2558	0.109767	23.2558	0	23.2558	0.11345	5	0
5	7	0.2246	22.2618	0.119768	0	0	44.5236	0.1131	0	0
5	7	0.2016	24.8016	0.115327	24.8016	0	9.92063	0.17575	5	0
5	7	0.1564	25.5754	0.0767263	38.3632	0	0	0.1717	6	0
5	7	0.21825	22.9095	0.065063	0	0	41.2371	0.07635	0	0
5	7	0.1608	24.8756	0.0702736	6.21891	0	0	0.2018	1	0
5	7	0.2212	22.604	0.0745931	18.0832	0	36.1664	0.04725	4	0
5	7	0.40235	14.9124	0.0304461	29.8248	7.45619	67.1058	0.00115	12	3
5	7	0.2162	23.1267	0.114015	46.2535	0	23.1267	0.1827	10	0
5	7	0.2155	23.2019	0.0883991	13.9211	0	46.4037	0.1178	3	0
5	7	0.2637	22.7531	0.132158	53.0906	0	64.4672	0.04115	14	0
5	7	0.21875	22.8571	0.143771	22.8571	0	27.4286	0.15655	5	0
5	7	0.17335	23.0747	0.0920104	11.5374	0	23.0747	0.12865	2	0
5	7	0.19905	25.1193	0.0987189	50.2386	0	20.0955	0.14985	10	0
5	7	0.31605	18.9843	0.0548964	18.9843	0	50.6249	0.1418	6	0
5	7	0.255	23.5294	0.0823529	47.0588	0	50.9804	0.0863	12	0
5	7	0.16255	24.6078	0.138111	55.3676	0	0	0.173	9	0
5	7	0.2289	21.8436	0.129533	30.581	0	34.9498	0.10485	7	0
5	7	0.2217	22.553	0.127876	18.0424	0	31.5742	0.1406	4	0
5	7	0.22415	22.3065	0.129824	13.3839	0	40.1517	0.0626	3	0
5	7	0.26065	19.1828	0.0738538	23.0194	0	38.3656	0.1566	6	0
5	7	0.26905	22.3007	0.0906895	33.451	0	52.0349	0.09335	9	0
5	7	0.27755	21.6177	0.137453	25.2207	3.60295	50.4414	0.0972	7	1
5	7	0.18035	22.1791	0.145828	22.1791	0	16.6343	0.1429	4	0
5	7	0.3347	20.9143	0.123095	38.8408	0	59.755	0.03295	13	0
5	7	0.21795	22.941	0.0880936	32.1175	0	32.1175	0.14285	7	0
5	7	0.16255	24.6078	0.0572132	6.15195	0	12.3039	0.14495	1	0
5	7	0.20345	24.5761	0.136397	19.6609	0	29.4913	0.14495	4	0
5	7	0.10345	28.9995	0.0647656	0	0	0	0.1311	0	0
5	7	0.15845	18.9334	0.027769	12.6223	0	0	0.1955	2	0
5	7	0.2187	18.2899	0.0635574	41.1523	0	59.4422	0.10815	9	0
5	7	0.16405	24.3828	0.0408412	42.6699	0	0	0.1749	7	0
5	7	0.2843	21.1045	0.0759761	38.6915	0	59.796	0.08655	11	0
5	7	0.2693	18.5667	0.0599703	48.2733	0	48.2733	0.10955	13	0
5	7	0.2166	18.4672	0.0623269	13.8504	0	23.084	0.1251	3	0
5	7	0.099	30.303	0.0383838	0	0	0	0.2037	0	0
5	7	0.21825	22.9095	0.173654	27.4914	0	27.4914	0.13095	6	0
5	7	0.1604	24.9377	0.156484	0	0	0	0.21575	0	0
5	7	0.16305	24.5324	0.0763569	18.3993	0	0	0.21415	3	0
5	7	0.20775	24.0674	0.0652226	9.62696	0	19.2539	0.15595	2	0
5	7	0.21325	23.4467	0.119578	4.68933	0	46.8933	0.09895	1	0
5	7	0.2097	23.8436	0.103004	23.8436	0	52.4559	0.04195	5	0
5	7	0.2169	23.0521	0.071692	27.6625	0	46.1042	0.1032	6	0
5	7	0.127	23.622	0.0492126	15.748	0	7.87402	0.1056	2	0
5	7	0.22805	17.54	0.0339838	52.62	0	39.465	0.11715	12	0
5	7	0.262	22.9008	0.0891221	38.1679	0	49.6183	0.13725	10	0
5	7	0.29205	20.5444	0.0814929	13.6963	13.6963	41.0889	0.1267	4	4
5	7	0.2241	22.3115	0.0800982	35.6983	0	44.6229	0.1132	8	0
5	7	0.1522	26.2812	0.160644	6.5703	0	0	0.19655	1	0
5	7	0.22295	17.9412	0.0666069	35.8825	0	35.8825	0.15965	8	0
5	7	0.21285	23.4907	0.128964	18.7926	0	18.7926	0.18175	4	0
5	7	0.257	23.3463	0.0844358	35.0195	0	54.4747	0.1162	9	0
5	7	0.2659	18.8041	0.0863106	7.52162	0	48.8906	0.115	2	0
5	7	0.26285	15.2178	0.0420392	38.0445	0	22.8267	0.1539	10	0
5	7	0.22605	17.6952	0.116125	44.238	0	35.3904	0.12935	10	0
5	7	0.2158	23.1696	0.111446	9.26784	0	46.3392	0.10035	2	0
5	7	0.25575	23.4604	0.158749	31.2805	0	43.0108	0.0634	8	0
5	7	0.23135	25.9347	0.2252	51.8695	0	56.1919	0.1345	12	0
5	7	0.2519	23.819	0.118698	27.7888	0	43.6681	0.09285	7	0
5	7	0.26155	19.1168	0.105907	34.4102	0	53.5271	0.1021	9	0
5	7	0.15805	25.3084	0.0863651	25.3084	0	0	0.1631	4	0
5	7	0.21015	19.034	0.111349	52.3436	0	23.7925	0.0881	11	0
5	7	0.20385	24.5278	0.0789796	14.7167	0	4.90557	0.1734	3	0
5	7	0.21815	22.92	0.081366	13.752	0	32.088	0.0968	3	0
5	7	0.16555	18.1214	0.0667472	24.1619	0	0	0.1695	4	0
5	7	0.21735	23.0044	0.101679	18.4035	0	50.6096	0.1069	4	0
5	7	0.15485	19.3736	0.0555376	25.8314	0	0	0.16595	4	0
5	7	0.1105	27.1493	0.0819005	45.2489	0	0	0.18955	5	0
5	7	0.2159	23.1589	0.0842983	27.7906	0	32.4224	0.1248	6	0
5	7	0.2601	23.0681	0.0478662	30.7574	0	53.8255	0.10665	8	0
5	7	0.1618	24.7219	0.0179234	6.18047	0	0	0.2027	1	0
5	7	0.2115	23.6407	0.134752	28.3688	0	37.8251	0.1196	6	0
5	7	0.2655	22.5989	0.0691149	7.53296	0	56.4972	0.1406	2	0
5	7	0.2176	22.9779	0.0827206	27.5735	0	41.3603	0.13865	6	0
5	7	0.16175	24.7295	0.0503864	24.7295	0	6.18238	0.09935	4	0
5	7	0.1648	24.2718	0.092233	36.4078	0	0	0.17045	6	0
5	7	0.26055	23.0282	0.0953752	34.5423	0	38.3803	0.1443	9	0
5	7	0.2549	19.6155	0.103178	31.3849	0	54.9235	0.14625	8	0
5	7	0.26185	15.2759	0.0387627	34.3708	0	64.9227	0.08555	9	0
5	7	0.21095	23.7023	0.0936241	47.4046	0	33.1832	0.1098	10	0
5	7	0.2142	18.6741	0.0627918	37.3483	0	18.6741	0.172	8	0
5	7	0.2027	24.667	0.198076	19.7336	0	9.8668	0.1604	4	0
5	7	0.2099	23.8209	0.121963	23.8209	0	38.1134	0.1241	5	0
5	7	0.312	22.4359	0.103205	41.6667	0	60.8974	0.09535	13	0
5	7	0.27025	22.2017	0.12988	37.0028	0	48.1036	0.1244	10	0
5	7	0.27795	21.5866	0.111171	35.9777	0	46.771	0.0787	10	0
4	7	0.48475	22.6921	0.102527	10.3146	10.3146	0	0.0506	5	5
4	7	0.2105	23.753	0.0456057	4.75059	4.75059	4.75059	0.0483	1	1
4	7	0.88765	19.1517	0.0761561	5.63285	6.75942	13.5188	0.04805	5	6
4	7	0.7024	15.6606	0.0888383	11.3895	8.54214	9.96583	0.00595	8	6
4	7	1.55495	17.3639	0.0689411	11.5759	8.3604	18.007	0.0745	18	13
4	7	0.7314	21.8759	0.0702762	19.1414	9.57069	10.9379	0.08215	14	7
4	7	0.75925	19.7563	0.0808034	11.8538	13.1709	19.7563	0.02275	9	10
4	7	1.4143	20.5048	0.114615	7.07064	5.65651	2.82825	0.2577	10	8
4	7	1.5572	14.7701	0.0893912	5.13743	3.85307	9.63267	0.0726	8	6
4	7	1.3272	19.5901	0.0942209	11.302	3.76733	12.0555	0.02295	15	5
4	7	1.8368	16.3328	0.0653038	5.44425	11.4329	16.8772	0.06055	10	21
4	7	2.69215	18.944	0.0834463	17.8296	9.28626	14.4866	0.04505	48	25
4	7	1.19255	20.1249	0.0779003	14.2552	13.4166	14.2552	0.0205	17	16
4	7	0.8284	16.9	0.0546234	16.9	12.0715	25.3501	0.0174	14	10
4	7	0.70945	18.3241	0.0682219	21.1431	14.0954	22.5527	0.0229	15	10
4	7	0.56385	17.7352	0.0839762	19.5087	15.9617	19.5087	0.06435	11	9
4	7	0.4543	22.0119	0.0836452	22.0119	15.4083	17.6095	0.0014	10	7
4	7	0.3965	22.6986	0.0900378	20.1765	7.5662	17.6545	0.007	8	3
4	7	0.42385	16.5153	0.0388109	11.7966	21.2339	18.8746	0.0092	5	9
4	7	0.38865	23.1571	0.0841374	15.4381	12.865	18.0111	0.0197	6	5
4	7	0.85745	17.4937	0.0854277	17.4937	13.995	19.8262	0.0588	15	12
4	7	0.67135	22.343	0.0973412	22.343	8.93722	16.3849	0.13395	15	6
4	7	1.8496	18.3824	0.0821259	16.2197	12.4351	17.301	0.1351	30	23
4	7	1.04615	20.0736	0.109449	15.2942	6.6912	16.2501	0.082	16	7
4	7	1.52295	17.0721	0.0762008	16.4155	13.789	23.6383	0.10395	25	21
4	7	1.4487	15.8763	0.0486988	11.0444	8.28329	16.5666	0.0295	16	12
4	7	0.83545	20.3483	0.058651	10.7726	9.57568	16.7574	0.07985	9	8
4	7	0.52925	22.6736	0.0770902	9.44733	7.55786	11.3368	0.1527	5	4
4	7	1.6498	15.7595	0.0703722	13.9411	7.27361	18.7902	0.11255	23	12
4	7	1.6117	16.7525	0.0472482	14.2706	8.68648	10.5479	0.0162	23	14
4	7	0.43535	20.673	0.0845297	13.782	4.594	13.782	0.0165	6	2
4	7	2.5754	17.473	0.0621457	11.2604	6.60092	13.9784	0.04935	29	17
4	7	0.90835	17.6144	0.0677602	14.3117	12.1099	14.3117	0.0016	13	11
4	7	0.83765	17.9072	0.0513938	23.8763	10.7443	22.6825	0.00295	20	9
4	7	0.4701	17.0177	0.0549883	14.8904	12.7632	21.2721	0.1345	7	6
4	7	0.33105	24.1655	0.0842773	12.0828	12.0828	24.1655	0.09205	4	4
4	7	0.6087	21.357	0.0772137	16.4285	16.4285	16.4285	0.1574	10	10
4	7	0.60525	16.5221	0.0421314	23.1309	13.2177	28.0876	0.04045	14	8
4	7	0.4126	19.3892	0.0796171	19.3892	16.9656	26.6602	0.03655	8	7
4	7	2.1426	15.8686	0.0575469	22.4027	16.802	12.1348	0.01835	48	36
4	7	0.9139	19.6958	0.0645585	13.1305	7.65948	18.6016	0.0401	12	7
4	7	3.05375	17.6832	0.0682603	17.6832	10.8064	15.7184	0.0926	54	33
4	7	0.2709	22.1484	0.0773348	14.7656	11.0742	18.457	0.01075	4	3
4	7	1.11935	20.5476	0.078483	20.5476	9.82713	24.1211	0.06605	23	11
4	7	0.7831	17.8777	0.0550377	16.6007	8.93883	29.3705	0.0063	13	7
4	7	0.8471	18.888	0.047279	23.61	22.4295	18.888	0.16085	20	19
4	7	0.61665	19.46	0.049704	14.595	12.9733	24.325	0.00795	9	8
4	7	1.23095	17.06	0.0464276	9.74857	7.31143	14.6229	0.00965	12	9
4	7	0.5786	20.7397	0.0775147	15.5548	3.45662	13.8265	0.1315	9	2
4	7	1.2908	19.3678	0.0730942	12.3954	7.74713	20.9173	0.00115	16	10
4	7	1.40255	18.5377	0.0814588	18.5377	12.8338	12.8338	0.02005	26	18
4	7	1.5058	17.2666	0.0852703	13.282	13.9461	15.9384	0.14235	20	21
4	7	1.14565	18.3302	0.0861083	14.8387	6.11007	21.8217	0.145	17	7
4	7	0.6536	21.4198	0.06862	13.7699	7.64994	7.64994	0.17485	9	5
4	7	0.6668	20.9958	0.0752849	23.9952	16.4967	17.9964	0.06885	16	11
4	7	1.28585	18.6647	0.0668818	20.2201	13.2208	20.2201	0.0062	26	17
4	7	0.52875	20.8038	0.068747	18.9125	11.3475	11.3475	0.1047	10	6
4	7	0.383	23.4987	0.0612272	15.6658	10.4439	20.8877	0.0714	6	4
4	7	0.5308	22.6074	0.0709307	13.1876	15.0716	15.0716	0.00135	7	8
4	7	1.30145	19.2093	0.075147	18.441	9.22048	14.5991	0.0504	24	12
4	7	0.5784	20.7469	0.0682918	19.018	5.18672	22.4758	0.0895	11	3
4	7	1.33955	19.4095	0.091374	13.4373	7.46519	20.156	0.0204	18	10
4	7	0.95125	16.82	0.0638108	19.9737	9.46124	21.025	0.06315	19	9
4	7	0.5298	20.7626	0.0659683	24.5376	15.1	16.9875	0.0107	13	8
4	7	0.53485	18.6968	0.0718893	20.5665	9.34842	20.5665	0.003	11	5
4	7	0.6692	17.9319	0.0411686	17.9319	16.4375	23.9091	0.10525	12	11
4	7	0.6343	20.495	0.0740186	18.9185	9.45925	26.8012	0.01085	12	6
4	7	0.80545	18.6231	0.0528897	31.0385	18.6231	22.3478	0.03335	25	15
4	7	0.4431	18.0546	0.042654	15.7978	9.02731	24.8251	0.0359	7	4
4	7	0.94735	16.8892	0.0468676	23.2227	11.6113	25.3338	0.0223	22	11
4	7	1.8205	19.7748	0.0708322	19.7748	12.6339	19.2255	0.0159	36	23
4	7	0.28035	24.9688	0.0856073	10.7009	10.7009	24.9688	0.0828	3	3
4	7	2.12355	14.5982	0.0578748	19.7782	18.8364	26.3709	0.0124	42	40
4	7	3.2099	18.0691	0.0776037	17.7576	16.5114	20.5614	0.01015	57	53
4	7	1.0897	17.436	0.0510232	21.1067	11.0122	13.7653	0.1209	23	12
4	7	0.61975	20.9762	0.0569585	17.7491	14.522	22.5898	0.008	11	9
4	7	1.0143	15.7744	0.0497387	15.7744	14.7885	27.6052	0.00315	16	15
4	7	0.82395	14.564	0.0713029	18.205	16.9913	23.0597	0.0296	15	14
4	7	1.1819	15.2297	0.04387	21.1524	15.2297	24.5368	0.0659	25	18
4	7	0.38275	20.9014	0.108687	13.0634	7.83801	18.2887	0.03	5	3
4	7	1.2142	14.001	0.0423324	14.001	14.8246	27.1784	0.01185	17	18
4	7	0.48595	22.6361	0.108344	24.6939	10.2891	22.6361	0.06305	12	5
4	7	0.4215	23.7248	0.0807829	14.2349	4.74496	23.7248	0.03385	6	2
4	7	0.55675	21.5537	0.0854962	12.573	5.38841	19.7575	0.01495	7	3
4	7	0.89245	17.9282	0.068071	19.0487	8.96409	17.9282	0.00245	17	8
4	7	0.6425	15.5642	0.0529961	17.1206	6.22568	14.0078	0.0255	11	4
4	7	2.2215	16.6554	0.0587666	22.9575	13.0542	20.7067	0.0303	51	29
4	7	3.6605	16.6644	0.0634476	17.7571	17.484	19.9426	0.0093	65	64
4	7	0.5659	21.2052	0.10311	19.4381	14.1368	17.671	0.00985	11	8
4	7	1.26395	16.6146	0.0427628	15.8234	15.8234	22.1528	0.01055	20	20
4	7	0.48505	22.6781	0.0717452	14.4315	10.3082	22.6781	0.00655	7	5
4	7	1.2583	16.6892	0.0529286	18.2786	16.6892	22.2522	0.12515	23	21
4	7	2.1487	14.4273	0.0493787	16.2889	10.2387	18.6159	0.0049	35	22
4	7	1.30355	18.4113	0.0627517	20.7127	13.0413	23.0141	0.0685	27	17
4	7	1.0724	19.5822	0.0769302	18.6498	13.0548	12.1223	0.00855	20	14
4	7	0.2758	14.5033	0.0157723	18.1291	10.8774	7.25163	0.1408	5	3
4	7	0.3923	20.3926	0.0604129	10.1963	12.7453	20.3926	0.08915	4	5
4	7	2.51645	17.4849	0.0721652	19.0745	13.1137	21.0614	0.01955	48	33
4	7	0.5182	23.1571	0.0654188	23.1571	13.5083	30.8761	0.0273	12	7
4	7	0.4666	21.4316	0.0661166	12.859	10.7158	21.4316	0.16305	6	5
4	7	0.9358	19.2349	0.0684441	18.1663	12.8233	20.3035	0.01675	17	12
4	7	0.7465	20.0938	0.070931	17.4146	6.69792	20.0938	0.02115	13	5
4	7	1.0336	16.4474	0.0571304	21.2848	15.4799	19.3498	0.03125	22	16
4	7	0.3896	17.9671	0.0341376	20.5339	15.4004	23.1006	0.0651	8	6
4	7	1.568	17.8571	0.0579082	21.0459	18.4949	24.8724	0.01145	33	29
4	7	2.44865	16.3355	0.0701815	21.2362	13.4768	17.5607	0.0328	52	33
4	7	1.4635	13.6659	0.046259	19.8155	12.9826	25.2819	0.0018	29	19
4	7	0.29765	23.5176	0.0839913	20.1579	13.4386	13.4386	0.09935	6	4
4	7	0.30435	16.4285	0.0453425	13.1428	3.28569	32.8569	0.01285	4	1
4	7	0.63195	17.4064	0.0607643	22.1537	14.2416	17.4064	0.03715	14	9
4	7	0.71675	18.1374	0.046669	19.5326	15.3471	27.9037	0.0288	14	11
4	7	0.97925	16.339	0.062701	28.5933	19.4026	14.2967	0.05175	28	19
4	7	1.10125	18.1612	0.0720091	21.7934	9.08059	27.2418	0.02445	24	10
4	7	2.6318	18.6184	0.0655635	19.3784	12.5389	15.5787	0.04325	51	33
4	7	0.5611	16.0399	0.0457138	16.0399	3.56443	17.8221	0.08775	9	2
4	7	0.567	19.4004	0.0545855	14.1093	8.81834	17.6367	0.00365	8	5
4	7	0.33575	17.8704	0.0585257	23.8273	5.95681	23.8273	0.0601	8	2
4	7	0.4523	13.2655	0.0288525	19.8983	8.84369	8.84369	0.0616	9	4
4	7	0.159	18.8679	0.00251572	6.28931	6.28931	6.28931	0.0118	1	1
4	7	0.1511	19.8544	0.0234944	0	6.61813	6.61813	0.057	0	1
4	7	1.2728	19.6417	0.0838702	14.142	6.28536	25.9271	0.06015	18	8
4	7	0.67525	19.2521	0.0590892	28.1377	8.8856	22.214	0.04055	19	6
4	7	0.47995	22.9191	0.0995937	27.0862	6.25065	20.8355	0.0535	13	3
4	7	0.2774	21.6294	0.0627253	21.6294	7.20981	7.20981	0.1503	6	2
4	7	0.4015	22.4159	0.122042	14.944	4.98132	17.4346	0.03	6	2
4	7	1.14555	15.713	0.071625	20.0777	10.4753	19.2047	0.0454	23	12
4	7	0.7057	19.8385	0.0798498	12.7533	8.5022	17.0044	0.1111	9	6
4	7	0.63995	15.6262	0.0489101	12.501	17.1888	25.002	0.07	8	11
4	7	0.7472	17.3983	0.0612286	25.4283	14.7216	30.7816	0.00535	19	11
4	7	0.6247	16.0077	0.0762766	16.0077	8.00384	30.4146	0.0082	10	5
4	7	0.7259	17.9088	0.0810029	27.552	13.776	17.9088	0.0034	20	10
4	7	1.0759	14.8713	0.0433126	17.6596	13.0124	17.6596	0.04125	19	14
4	7	0.2452	20.3915	0.0581158	12.2349	16.3132	12.2349	0.10895	3	4
4	7	0.8441	17.7704	0.0588793	16.5857	7.10816	18.9551	0.1052	14	6
4	7	0.5162	19.3723	0.0718714	23.2468	5.8117	19.3723	0.09285	12	3
4	7	2.12165	18.3819	0.0709825	16.4966	11.7833	24.0379	0.0673	35	25
3	7	0.38025	23.6686	0.133596	5.2597	2.62985	0	0.74735	2	1
3	7	0.3413	23.4398	0.188544	0	2.92997	2.92997	0.14455	0	1
3	7	0.30315	23.0909	0.134257	13.1948	6.59739	3.2987	0.2536	4	2
3	7	0.28805	24.3013	0.143551	13.8865	3.47162	3.47162	0.114	4	1
3	7	0.73385	17.7148	0.0983171	5.45071	1.36268	2.72535	0.33565	4	1
3	7	0.29605	23.6447	0.124134	6.75562	3.37781	0	0.469	2	1
3	7	0.20245	29.6369	0.103976	4.93949	0	9.87898	0.16015	1	0
3	7	0.3451	23.1817	0.137641	8.69313	0	2.89771	0.1183	3	0
3	7	0.53055	24.5029	0.0933936	7.53935	1.88484	11.309	0.1298	4	1
3	7	0.29485	23.7409	0.118535	10.1747	0	13.5662	0.09495	3	0
3	7	0.45555	17.5612	0.0921962	4.3903	2.19515	4.3903	0.1803	2	1
3	7	0.3211	24.9144	0.184989	3.11429	3.11429	3.11429	0.04905	1	1
3	7	0.2617	22.927	0.119603	11.4635	0	3.82117	0.1999	3	0
3	7	0.28565	28.0063	0.17924	7.00158	3.50079	7.00158	0.078	2	1
3	7	0.2894	27.6434	0.122149	3.45543	0	3.45543	0.01025	1	0
3	7	0.30155	23.2134	0.0989886	6.6324	3.3162	6.6324	0.03675	2	1
3	7	0.3675	27.2109	0.140408	8.16327	0	0	0.4054	3	0
3	7	0.2433	24.6609	0.153103	8.2203	0	4.11015	0.1205	2	0
3	7	0.336	23.8095	0.14003	8.92857	2.97619	2.97619	0.31885	3	1
3	7	0.3708	24.2718	0.174218	2.69687	0	0	0.3722	1	0
3	7	0.33875	23.6162	0.111439	5.90406	0	5.90406	0.18695	2	0
3	7	0.43915	22.7713	0.132529	4.55425	2.27713	4.55425	0.05335	2	1
3	7	0.25505	23.5248	0.129582	3.9208	3.9208	3.9208	0.0411	1	1
3	7	0.2978	23.5057	0.0950302	6.71592	3.35796	3.35796	0.221	2	1
3	7	0.18695	26.7451	0.140679	0	0	10.698	0.0306	0	0
3	7	0.2067	24.1896	0.125544	9.67586	0	9.67586	0.0658	2	0
3	7	0.3592	22.2717	0.177339	0	0	2.78396	0.1331	0	0
3	7	0.25055	23.9473	0.153263	0	0	0	0.27575	0	0
3	7	0.25135	23.8711	0.108613	3.97852	0	0	0.49835	1	0
3	7	0.24165	20.6911	0.0591765	4.13822	0	0	1.4565	1	0
3	7	0.28005	28.5663	0.117479	0	0	0	0.63095	0	0
3	7	0.4247	16.4822	0.0913586	2.3546	0	0	0.5902	1	0
3	7	0.29295	23.8949	0.0913125	0	3.41355	6.8271	0.16845	0	1
3	7	0.33875	20.6642	0.0873801	0	0	0	0.38375	0	0
3	7	0.38725	23.2408	0.0990316	2.58231	0	2.58231	0.14585	1	0
3	7	0.30775	22.7457	0.0862713	0	0	3.24939	0.077	0	0
3	7	0.54395	20.2224	0.07372	1.8384	0	0	1.8341	1	0
3	7	0.24925	24.0722	0.102909	0	0	0	0.88705	0	0
3	7	0.30215	23.1673	0.14976	3.30961	0	3.30961	0.15935	1	0
3	7	0.44305	20.3137	0.16251	0	0	2.25708	0.3441	0	0
3	7	0.24745	24.2473	0.112548	4.04122	0	0	2.31705	1	0
3	7	0.3333	21.0021	0.129763	0	0	0	1.28905	0	0
3	7	0.4961	22.1729	0.119331	0	0	4.03145	0.05175	0	0
3	7	0.56125	17.8174	0.124187	0	3.56347	1.78174	0.45865	0	2
3	7	0.3302	24.2277	0.161266	9.0854	0	0	0.3478	3	0
3	7	0.2996	20.0267	0.0744326	3.33778	0	0	0.33855	1	0
3	7	0.2993	16.7056	0.0608086	3.34113	3.34113	6.68226	0.22805	1	1
3	7	0.39995	27.5034	0.0846356	5.00063	0	0	2.31405	2	0
3	7	0.567	26.455	0.206526	0	0	3.52734	0.11085	0	0
3	7	0.17945	27.8629	0.182502	0	0	5.57258	0.0808	0	0
3	7	0.25785	23.2693	0.0987008	3.87822	0	3.87822	0.15	1	0
3	7	0.48655	22.6082	0.140582	0	0	2.05529	0.23915	0	0
3	7	0.24245	24.7474	0.163126	0	0	0	0.34325	0	0
3	7	0.2937	23.8338	0.167858	3.40483	3.40483	3.40483	0.16195	1	1
3	7	0.53865	14.8519	0.0454841	1.85649	0	1.85649	0.28745	1	0
3	7	0.2937	23.8338	0.204801	3.40483	0	3.40483	0.16505	1	0
3	7	0.3078	25.9909	0.119883	3.24886	0	3.24886	0.10035	1	0
3	7	0.2518	23.8284	0.122121	0	0	0	0.8395	0	0
3	7	0.299	23.4114	0.165217	3.34448	0	0	0.6226	1	0
3	7	0.2046	24.4379	0.158113	4.88759	0	0	0.27235	1	0
3	7	0.23995	25.0052	0.251927	4.16753	0	0	0.44005	1	0
3	7	0.25845	23.2153	0.134262	0	0	3.86922	0.1391	0	0
3	7	0.3389	17.7043	0.191354	5.90145	0	0	0.74015	2	0
3	7	0.40415	17.3203	0.164295	0	0	2.47433	0.12915	0	0
3	7	0.24435	24.5549	0.163904	0	0	0	0.4116	0	0
3	7	0.24685	24.3063	0.102896	4.05104	0	0	0.87625	1	0
3	7	0.21795	27.5292	0.142464	0	0	0	0.2699	0	0
3	7	0.2383	20.982	0.103021	0	0	4.19639	0.14325	0	0
3	7	0.2893	24.1963	0.168337	6.91324	0	0	0.903	2	0
3	7	0.19765	25.2972	0.143688	0	0	5.05945	0.08695	0	0
3	7	0.29805	23.486	0.105184	10.0654	0	3.35514	0.16775	3	0
3	7	0.3274	24.4349	0.120495	6.10874	0	6.10874	0.1117	2	0
3	7	0.3007	23.279	0.122547	3.32557	3.32557	0	0.366	1	1
3	7	0.20245	29.6369	0.175846	4.93949	4.93949	9.87898	0.0849	1	1
3	7	0.2913	24.0302	0.134054	0	0	0	0.5643	0	0
3	7	0.26105	22.9841	0.12986	0	0	3.83068	0.1619	0	0
3	7	0.3303	21.1929	0.0855283	0	0	3.02755	0.00975	0	0
3	7	0.2622	22.8833	0.123379	3.81388	0	0	0.82285	1	0
3	7	0.26465	22.6715	0.146609	3.77858	0	3.77858	0.20765	1	0
3	7	0.2543	23.5942	0.108533	0	0	0	0.2789	0	0
3	7	0.25835	23.2243	0.0836075	0	0	0	0.7109	0	0
3	7	0.29335	23.8623	0.0956196	3.4089	0	3.4089	0.2705	1	0
3	7	0.25455	23.571	0.160479	3.9285	0	3.9285	0.119	1	0
3	7	0.3533	22.6436	0.0953864	0	0	5.66091	0.12945	0	0
3	7	0.24945	24.0529	0.174183	4.00882	4.00882	8.01764	0.13165	1	1
3	7	0.2512	23.8854	0.168989	3.98089	0	0	1.34275	1	0
3	7	0.15275	26.1866	0.0864157	0	0	0	0.7381	0	0
3	7	0.2441	24.5801	0.158337	4.09668	0	0	0.6564	1	0
3	7	0.2485	24.1449	0.113682	8.04829	0	4.02414	0.1812	2	0
3	7	0.21505	23.2504	0.0806789	0	0	4.65008	0.14875	0	0
3	7	0.2474	24.2522	0.141876	4.04204	0	0	1.40215	1	0
3	7	0.3609	19.396	0.103491	0	0	0	0.40545	0	0
3	7	0.29115	24.0426	0.12193	6.86931	0	3.43466	0.14415	2	0
3	7	0.2897	24.1629	0.0776666	0	0	3.45185	0.1679	0	0
3	7	0.249	24.0964	0.12008	0	0	4.01606	0.11185	0	0
3	7	0.21105	28.4293	0.0850509	0	0	0	0.3213	0	0
3	7	0.2947	23.753	0.0760095	0	0	6.78656	0.1279	0	0
3	7	0.306	22.8758	0.132026	0	0	6.53595	0.132	0	0
3	7	0.2514	23.8663	0.105012	0	0	0	0.4097	0	0
3	7	0.29755	23.5255	0.154428	10.0823	0	6.72156	0.1434	3	0
3	7	0.45805	19.6485	0.0672416	2.18317	0	4.36634	0.1173	1	0
3	7	0.246	24.3902	0.130488	4.06504	0	0	1.017	1	0
3	7	0.24635	24.3556	0.0801705	0	0	4.05927	0.14215	0	0
3	7	0.6568	16.7479	0.0694275	4.5676	1.52253	4.5676	0.2302	3	1
3	7	0.26135	22.9577	0.108284	3.82629	3.82629	3.82629	0.1676	1	1
3	7	0.2045	24.4499	0.098533	0	0	9.77995	0.0495	0	0
3	7	0.14665	27.2758	0.171156	0	0	6.81896	0.0565	0	0
3	7	0.25285	23.7295	0.0943247	3.95491	0	0	0.6458	1	0
3	7	0.28795	24.3098	0.150721	0	0	3.47283	0.1268	0	0
3	7	0.23745	25.2685	0.0968625	0	0	0	1.2919	0	0
3	7	0.41035	19.4956	0.112831	0	0	2.43694	0.25665	0	0
3	7	0.3165	18.9573	0.0579779	6.31912	0	0	0.3416	2	0
3	7	0.2873	24.3648	0.12339	0	0	3.48068	0.1195	0	0
3	7	0.2985	20.1005	0.0698492	0	0	0	0.3596	0	0
3	7	0.256	23.4375	0.162305	7.8125	0	3.90625	0.1135	2	0
3	7	0.2437	24.6204	0.107304	4.10341	0	12.3102	0.0572	1	0
3	7	0.40155	19.9228	0.0925165	4.9807	0	4.9807	0.0314	2	0
3	7	0.3446	26.1172	0.0446895	2.90192	0	2.90192	0.2271	1	0
3	7	0.2827	24.7612	0.124867	3.53732	3.53732	10.612	0.1056	1	1
3	7	0.2538	23.6407	0.141253	3.94011	0	3.94011	0.14085	1	0
3	7	0.20045	24.9439	0.0982789	4.98878	0	4.98878	0.0919	1	0
3	7	0.21195	23.5905	0.0887002	4.71809	0	4.71809	0.1839	1	0
3	7	0.2401	24.9896	0.0939192	8.32986	0	0	0.27865	2	0
3	7	0.29	24.1379	0.0882759	6.89655	0	0	0.74695	2	0
3	7	0.2441	24.5801	0.0800901	8.19336	4.09668	0	1.4832	2	1
3	7	0.2935	23.8501	0.118399	0	0	3.40716	0.271	0	0
3	7	0.2442	24.57	0.212735	0	8.19001	0	0.49145	0	2
3	7	0.3028	23.1176	0.114102	6.60502	0	3.30251	0.2409	2	0
3	7	0.24905	24.0915	0.156796	4.01526	0	4.01526	0.11805	1	0
3	7	0.2825	24.7788	0.106549	7.07965	0	0	0.4182	2	0
3	7	0.3728	21.4592	0.0633047	8.04721	0	2.6824	0.12745	3	0
3	7	0.3887	23.1541	0.0954464	2.57268	0	7.71803	0.1555	1	0
3	7	0.2345	25.5864	0.143923	8.52878	0	0	0.24685	2	0
3	7	0.3254	24.5851	0.194222	6.14628	0	3.07314	0.31135	2	0
3	7	0.2377	25.2419	0.0929743	4.20698	0	4.20698	0.12115	1	0
3	7	0.24715	24.2768	0.118754	0	0	0	4.8244	0	0
3	7	0.31615	22.1414	0.123201	0	0	0	3.10985	0	0
3	7	0.2825	24.7788	0.142301	0	0	0	2.5712	0	0
3	7	0.2986	23.4427	0.148359	0	0	0	1.72305	0	0
3	7	0.26055	26.8662	0.155057	0	0	0	0.55605	0	0
3	7	0.2058	29.1545	0.0993683	0	0	0	0.5924	0	0
3	7	0.24415	24.5751	0.150317	4.09584	0	4.09584	0.2397	1	0
3	7	0.2764	25.3256	0.1089	0	0	3.61795	0.22325	0	0
3	7	0.2905	24.0964	0.0998279	6.88468	0	3.44234	0.28855	2	0
3	7	0.26495	26.4201	0.142291	7.54859	0	3.7743	0.2412	2	0
3	7	0.32835	18.2732	0.0730927	9.13659	0	6.09106	0.03785	3	0
3	7	0.3277	24.4126	0.136405	3.05157	0	0	0.37445	1	0
3	7	0.29695	23.573	0.116855	0	0	0	0.36895	0	0
3	7	0.2643	26.4851	0.186341	7.56716	0	7.56716	0.0596	2	0
3	7	0.8078	16.0931	0.0420896	7.42758	3.71379	6.18965	0.10635	6	3
3	7	0.28915	24.2089	0.119834	0	0	0	0.4927	0	0
3	7	0.28915	24.2089	0.0769497	0	0	3.45841	0.2851	0	0
3	7	0.2874	24.3563	0.0939457	3.47947	0	10.4384	0.0679	1	0
3	7	0.2854	24.527	0.139278	3.50385	3.50385	7.00771	0.0917	1	1
3	7	0.32845	24.3568	0.161516	6.08921	0	6.08921	0.1121	2	0
3	7	0.2483	24.1643	0.111961	12.0822	4.02739	16.1095	0.09125	3	1
3	7	0.2475	24.2424	0.0767677	4.0404	0	0	0.4109	1	0
3	7	0.4497	20.0133	0.138537	0	0	8.89482	0.12095	0	0
3	7	0.3537	19.7908	0.0872208	0	0	11.309	0.02005	0	0
3	7	0.23585	25.4399	0.143099	8.47997	0	0	0.29365	2	0
3	7	0.3058	19.6207	0.102191	19.6207	6.54022	6.54022	0.1598	6	2
3	7	0.30615	22.8646	0.0906418	3.26637	0	6.53275	0.07295	1	0
3	7	0.2379	25.2207	0.0729298	4.20345	0	4.20345	0.1944	1	0
3	7	0.1903	26.2743	0.074619	5.25486	0	10.5097	0.07075	1	0
3	7	0.19595	25.5167	0.0997703	0	0	0	0.4687	0	0
3	7	0.19395	25.7798	0.0992524	10.3119	0	0	0.327	2	0
3	7	0.45765	21.8508	0.114826	6.55523	0	2.18508	0.31075	3	0
3	7	0.2872	24.3733	0.121344	6.96379	3.48189	6.96379	0.1405	2	1
3	7	0.35015	25.7033	0.195488	11.4237	2.85592	2.85592	0.15745	4	1
3	7	0.2404	24.9584	0.125416	8.31947	4.15973	8.31947	0.0337	2	1
3	7	0.48035	18.7363	0.0869158	8.32726	2.08182	8.32726	0.04435	4	1
3	7	0.24625	24.3655	0.105787	4.06091	4.06091	4.06091	0.1281	1	1
3	7	0.2657	26.3455	0.201167	11.2909	0	3.76364	0.18515	3	0
3	7	0.2568	23.3645	0.143497	3.89408	0	7.78816	0.03695	1	0
3	7	0.2411	24.8859	0.174824	8.29531	0	4.14766	0.2121	2	0
3	7	0.3289	21.2831	0.090301	6.08088	6.08088	6.08088	0.1366	2	2
3	7	0.20515	24.3724	0.113088	4.87448	0	14.6234	0.03965	1	0
3	7	0.2955	23.6887	0.104907	6.76819	0	10.1523	0.0429	2	0
3	7	0.46355	17.2581	0.0842412	8.62906	2.15726	4.31453	0.04205	4	1
3	7	0.2755	21.7786	0.114338	7.25953	0	14.5191	0.02305	2	0
3	7	0.50045	23.9784	0.146568	7.99281	3.9964	5.9946	0.096	4	2
3	7	0.44865	17.8313	0.0978491	8.91564	2.22891	8.91564	0.08995	4	1
3	7	0.24285	24.7066	0.12518	8.23554	8.23554	12.3533	0.0907	2	2
3	7	0.245	24.4898	0.109184	8.16327	4.08163	8.16327	0.09585	2	1
3	7	0.1955	25.5754	0.0930946	5.11509	0	0	0.19875	1	0
3	7	0.2801	24.9911	0.129061	10.7105	3.57015	3.57015	0.2603	3	1
3	7	0.242	24.7934	0.104959	8.26446	0	8.26446	0.1176	2	0
3	7	0.24285	24.7066	0.113033	8.23554	0	8.23554	0.1161	2	0
3	7	0.66415	15.0568	0.0902658	10.5398	3.01137	10.5398	0.16785	7	2
3	7	0.39555	20.225	0.101757	7.58438	2.52813	10.1125	0.09325	3	1
3	7	0.30035	23.3061	0.115865	3.32945	6.6589	9.98835	0.0882	1	2
3	7	0.51725	15.4664	0.0709522	9.66651	5.7999	3.8666	0.04965	5	3
3	7	0.3478	23.0017	0.155693	5.75043	0	11.5009	0.00535	2	0
3	7	0.51695	17.4098	0.0897572	7.73769	5.80327	3.86885	0.2041	4	3
3	7	0.3051	22.9433	0.165192	9.83284	3.27761	6.55523	0.0851	3	1
3	7	0.26665	18.7512	0.0283143	11.2507	0	7.50047	0.10955	3	0
3	7	0.2444	24.5499	0.102496	4.09165	4.09165	4.09165	0.17265	1	1
3	7	0.77745	12.8626	0.0769181	5.14503	5.14503	6.43128	0.05945	4	4
3	7	0.39165	20.4264	0.101621	10.2132	0	7.6599	0.00815	4	0
3	7	0.2364	25.3807	0.154822	8.46024	0	4.23012	0.1128	2	0
3	7	0.1932	25.8799	0.0703934	0	5.17598	0	0.2473	0	1
3	7	0.2894	24.188	0.0915688	10.3663	0	3.45543	0.18245	3	0
3	7	0.32905	24.3124	0.106975	9.11716	0	0	0.4101	3	0
3	7	0.2507	23.933	0.0809733	7.97766	0	0	0.4862	2	0
3	7	0.1938	25.7998	0.0554696	5.15996	0	5.15996	0.1067	1	0
3	7	0.2399	25.0104	0.102126	0	0	4.1684	0.15365	0	0
3	7	0.24145	24.8499	0.0917374	4.14164	0	0	0.64585	1	0
3	7	0.2468	24.3112	0.0816451	12.1556	0	4.05186	0.12695	3	0
3	7	0.3322	24.0819	0.119205	9.0307	0	3.01023	0.09125	3	0
3	7	0.59425	21.8763	0.128061	1.68279	0	5.04838	0.02875	1	0
3	7	0.30325	23.0833	0.102721	3.29761	0	6.59522	0.07155	1	0
3	7	0.36705	16.3465	0.0706988	8.17327	0	8.17327	0.19495	3	0
3	7	0.3001	23.3256	0.0948017	9.99667	0	6.66445	0.0577	3	0
3	7	0.41605	19.2285	0.16236	2.40356	2.40356	12.0178	0.11745	1	1
3	7	0.29945	20.0367	0.0793121	3.33946	0	6.67891	0.0763	1	0
3	7	0.2858	24.4927	0.144682	6.9979	6.9979	0	0.3253	2	2
3	7	0.2848	24.5787	0.0984902	0	0	17.5562	0.09515	0	0
3	7	0.28965	24.1671	0.107026	6.90489	0	10.3573	0.09355	2	0
3	7	0.29205	23.9685	0.102893	6.84814	0	0	0.71085	2	0
3	7	0.3211	24.9144	0.198536	3.11429	0	3.11429	0.2826	1	0
3	7	0.2363	25.3915	0.129285	4.23191	0	8.46382	0.06865	1	0
3	7	0.291	24.055	0.104296	10.3093	3.43643	6.87285	0.0411	3	1
3	7	0.3487	22.9424	0.083166	8.60338	2.86779	5.73559	0.15395	3	1
3	7	0.29215	23.9603	0.0951566	10.2687	3.4229	0	0.3367	3	1
3	7	0.1956	25.5624	0.107618	0	0	0	0.2401	0	0
3	7	0.3011	26.5692	0.0773829	3.32116	0	3.32116	0.27375	1	0
3	7	0.28775	24.3267	0.197915	10.4257	3.47524	0	0.7052	3	1
3	7	0.3412	26.3775	0.0952521	2.93083	0	2.93083	0.09495	1	0
3	7	0.34255	23.3543	0.178952	5.83856	0	2.91928	0.1124	2	0
3	7	0.31745	22.0507	0.117814	3.1501	0	0	0.5199	1	0
3	7	0.2665	26.2664	0.0930582	0	0	3.75235	0.2302	0	0
3	7	0.32985	21.2218	0.105199	0	0	3.03168	0.15885	0	0
3	7	0.24805	24.1887	0.093328	0	4.03145	0	0.39905	0	1
3	7	0.2905	24.0964	0.102926	6.88468	0	3.44234	0.22135	2	0
3	7	0.23165	25.9011	0.0850421	4.31686	0	0	1.44635	1	0
3	7	0.289	20.7612	0.0877163	0	0	0	0.43385	0	0
3	7	0.24015	24.9844	0.129294	0	0	0	0.36325	0	0
3	7	0.24665	24.326	0.137036	4.05433	0	0	0.43725	1	0
3	7	0.28	25	0.136607	3.57143	0	7.14286	0.0713	1	0
3	7	0.12715	31.4589	0.0440425	0	0	0	0.29935	0	0
3	7	0.29165	24.0014	0.0939482	0	0	3.42877	0.09525	0	0
3	7	0.37755	21.1892	0.0652894	2.64866	0	2.64866	0.17505	1	0
3	7	0.47965	16.6788	0.0597311	4.16971	0	4.16971	0.0679	2	0
3	7	0.3938	25.3936	0.191976	10.1574	0	5.07872	0.06805	4	0
3	7	0.28825	24.2845	0.0666088	6.93842	0	3.46921	0.22405	2	0
3	7	0.3741	24.0577	0.0645549	2.67308	0	5.34616	0.14915	1	0
3	7	0.23905	25.0994	0.0976783	12.5497	0	4.18323	0.1537	3	0
3	7	0.3453	20.2722	0.0974515	5.79206	0	2.89603	0.14275	2	0
3	7	0.34225	23.3747	0.127246	2.92184	2.92184	5.84368	0.124	1	1
3	7	0.3781	23.8032	0.127083	7.93441	5.28961	5.28961	0.14645	3	2
3	7	0.2054	29.2113	0.141188	9.7371	0	9.7371	0.01355	2	0
3	7	0.24395	24.5952	0.151875	16.3968	0	8.1984	0.13005	4	0
3	7	0.1942	20.5973	0.0324408	0	0	0	0.29205	0	0
3	7	0.29995	23.3372	0.130688	6.66778	0	10.0017	0.0456	2	0
3	7	0.295	23.7288	0.120678	3.38983	3.38983	3.38983	0.18665	1	1
3	7	0.25	24	0.1058	8	0	4	0.11095	2	0
3	7	0.3788	18.4794	0.12698	5.27983	0	0	0.38795	2	0
3	7	0.2937	23.8338	0.066224	3.40483	0	0	1.8955	1	0
3	7	0.28405	24.6435	0.187995	0	0	0	0.7537	0	0
3	7	0.34	23.5294	0.121765	2.94118	0	5.88235	0.17365	1	0
3	7	0.1441	27.7585	0.0968078	0	0	0	0.2376	0	0
3	7	0.3832	15.6576	0.0123956	15.6576	0	10.4384	0.15135	6	0
3	7	0.3547	22.5543	0.0924725	5.63857	0	5.63857	0.12505	2	0
3	7	0.1991	25.113	0.104219	5.0226	5.0226	5.0226	0.09525	1	1
3	7	0.24235	24.7576	0.0674644	4.12626	0	8.25253	0.13605	1	0
3	7	0.2511	23.8949	0.072282	0	0	3.98248	0.0366	0	0
3	7	0.2404	24.9584	0.0590682	8.31947	0	4.15973	0.13845	2	0
3	7	0.1845	27.1003	0.0523035	5.42005	0	0	0.19945	1	0
3	7	0.3727	24.1481	0.145694	10.7325	0	8.04937	0.0469	4	0
3	7	0.29355	23.846	0.0907852	6.81315	0	6.81315	0.11205	2	0
3	7	0.3422	20.4559	0.0797779	5.84454	0	5.84454	0.13905	2	0
3	7	0.24385	24.6053	0.152348	8.20176	0	4.10088	0.15285	2	0
3	7	0.2382	25.1889	0.0973971	0	0	0	0.5	0	0
3	7	0.14815	26.9997	0.109686	6.74992	0	0	0.41295	1	0
3	7	0.2915	24.0137	0.0835334	6.86106	0	0	0.3135	2	0
3	7	0.3015	19.9005	0.074461	3.31675	0	3.31675	0.26455	1	0
3	7	0.28655	24.4285	0.113767	6.97958	0	3.48979	0.2319	2	0
3	7	0.2979	23.4978	0.0562269	0	0	3.35683	0.0596	0	0
3	7	0.36855	18.9934	0.120201	8.14001	2.71334	0	0.46325	3	1
3	7	0.24225	24.7678	0.115377	12.3839	8.25593	12.3839	0.10705	3	2
3	7	0.2989	30.1104	0.183339	6.6912	0	10.0368	0.07935	2	0
3	7	0.4186	19.1113	0.083612	14.3335	2.38892	4.77783	0.14095	6	1
3	7	0.22845	26.264	0.0978332	8.75465	0	4.37733	0.188	2	0
3	7	0.3513	22.7726	0.148449	5.69314	0	11.3863	0.076	2	0
3	7	0.2848	24.5787	0.103055	0	0	7.02247	0.1381	0	0
3	7	0.2893	24.1963	0.150881	3.45662	0	3.45662	0.20235	1	0
3	7	0.3315	24.1327	0.127753	3.01659	0	0	0.43235	1	0
3	7	0.1948	25.6674	0.105236	5.13347	0	0	0.31285	1	0
3	7	0.5255	15.2236	0.05804	5.70885	3.8059	11.4177	0.08155	3	2
3	7	0.1962	25.4842	0.109837	5.09684	5.09684	10.1937	0.0714	1	1
3	7	0.3402	23.5156	0.173574	8.81834	0	8.81834	0.00645	3	0
3	7	0.2927	23.9153	0.119406	3.41647	0	3.41647	0.1709	1	0
3	7	0.24135	24.8602	0.134659	12.4301	0	4.14336	0.14535	3	0
3	7	0.33815	23.6581	0.180098	5.91453	0	2.95727	0.3168	2	0
3	7	0.2474	24.2522	0.0858933	4.04204	0	0	0.37795	1	0
3	7	0.25285	23.7295	0.122998	7.90983	0	7.90983	0.0998	2	0
3	7	0.2466	24.3309	0.0780616	8.1103	4.05515	4.05515	0.16005	2	1
3	7	0.31175	19.2462	0.0781075	3.2077	0	3.2077	0.1047	1	0
3	7	0.252	23.8095	0.0884921	15.873	7.93651	7.93651	0.0557	4	2
3	7	0.29685	23.5809	0.0941553	3.3687	0	3.3687	0.1618	1	0
3	7	0.29205	23.9685	0.0614621	0	3.42407	3.42407	0.1486	0	1
3	7	0.29825	23.4702	0.108634	6.70578	0	6.70578	0.1646	2	0
3	7	0.32585	24.5512	0.0937548	9.20669	3.0689	3.0689	0.1125	3	1
3	7	0.2882	24.2887	0.0971548	6.93963	0	6.93963	0.06995	2	0
3	7	0.2827	24.7612	0.113017	7.07464	0	0	0.3551	2	0
3	7	0.287	24.3902	0.117073	6.96864	0	3.48432	0.07475	2	0
3	7	0.10485	28.6123	0.0524559	0	0	0	0.12925	0	0
3	7	0.24635	24.3556	0.0722549	0	0	4.05927	0.05985	0	0
3	7	0.43065	25.5428	0.113898	4.64414	0	6.96621	0.04115	2	0
3	7	0.2425	24.7423	0.13567	8.24742	0	4.12371	0.237	2	0
3	7	0.19255	25.9673	0.11893	5.19346	0	0	0.55515	1	0
3	7	0.2869	24.3987	0.13245	3.48554	0	3.48554	0.1085	1	0
3	7	0.198	25.2525	0.0989899	15.1515	0	0	0.2882	3	0
3	7	0.23525	25.5048	0.118172	4.2508	0	8.50159	0.16295	1	0
3	7	0.19445	25.7136	0.0812548	5.14271	0	5.14271	0.1612	1	0
3	7	0.1402	28.5307	0.0720399	7.13267	0	0	0.2216	1	0
3	7	0.19655	25.4388	0.116001	10.1755	0	5.08776	0.1511	2	0
3	7	0.6259	17.5747	0.0910689	7.9885	1.5977	6.3908	0.09405	5	1
3	7	0.23115	25.9572	0.119836	12.9786	0	4.3262	0.215	3	0
3	7	0.2385	25.1572	0.127463	4.19287	0	0	0.57095	1	0
3	7	0.28465	24.5916	0.186896	3.51309	0	0	0.32305	1	0
3	7	0.3338	23.9664	0.0747454	0	0	2.99581	0.09135	0	0
3	7	0.2058	24.2954	0.149903	9.71817	0	4.85909	0.1201	2	0
3	7	0.3946	17.7395	0.0718449	5.06842	2.53421	5.06842	0.13825	2	1
3	7	0.24655	24.3358	0.0981545	4.05597	0	4.05597	0.10865	1	0
3	7	0.33735	23.7142	0.106418	8.89284	2.96428	11.8571	0.10105	3	1
3	7	0.2885	24.2634	0.0986135	13.8648	3.4662	10.3986	0.0642	4	1
3	7	0.3483	20.0976	0.145564	5.74218	2.87109	8.61326	0.17555	2	1
3	7	0.2896	20.7182	0.0452348	6.90608	3.45304	3.45304	0.1037	2	1
3	7	0.2888	24.2382	0.038608	3.4626	0	3.4626	0.2075	1	0
3	7	0.2	25	0.11625	5	0	10	0.1244	1	0
3	7	0.19425	25.74	0.126126	5.14801	0	5.14801	0.1495	1	0
3	7	0.207	33.8164	0.170773	4.83092	0	4.83092	0.17005	1	0
3	7	0.2836	21.1566	0.079866	7.05219	3.52609	3.52609	0.211	2	1
3	7	0.1898	26.3435	0.0716544	10.5374	0	0	0.21765	2	0
3	7	0.24945	24.0529	0.0783724	4.00882	4.00882	8.01764	0.0801	1	1
3	7	0.20275	24.6609	0.0305795	9.86436	0	0	0.20605	2	0
3	7	0.28845	24.2676	0.134512	13.8672	0	10.4004	0.0006	4	0
3	7	0.19395	25.7798	0.122454	10.3119	0	0	0.2007	2	0
3	7	0.35335	19.8104	0.134428	8.49017	0	8.49017	0.0222	3	0
3	7	0.23985	25.0156	0.137378	8.33854	0	4.16927	0.12735	2	0
3	7	0.3748	24.0128	0.152081	5.33618	0	5.33618	0.1536	2	0
3	7	0.2868	24.4073	0.0985007	10.4603	0	10.4603	0.0574	3	0
3	7	0.2406	24.9377	0.120532	16.6251	0	8.31255	0.11515	4	0
3	7	0.44475	20.2361	0.0831928	6.74536	4.49691	6.74536	0.00345	3	2
3	7	0.249	24.0964	0.11245	4.01606	0	12.0482	0.07175	1	0
3	7	0.3608	13.8581	0.0630543	11.0865	0	8.31486	0.0105	4	0
3	7	0.2519	23.819	0.0829694	19.8491	0	11.9095	0.0251	5	0
3	7	0.1961	25.4972	0.157318	10.1989	0	5.09944	0.1287	2	0
3	7	0.2896	24.1713	0.0935773	3.45304	0	6.90608	0.09515	1	0
3	7	0.31975	25.0195	0.201095	6.25489	3.12744	9.38233	0.0629	2	1
3	7	0.3112	22.4936	0.0788882	9.6401	3.21337	6.42674	0.12185	3	1
3	7	0.23135	21.6123	0.148476	8.64491	0	17.2898	0.093	2	0
3	7	0.3964	17.6589	0.111756	7.56811	0	10.0908	0.0424	3	0
3	7	0.1963	25.4712	0.105451	15.2827	5.09424	0	0.231	3	1
3	7	0.154	25.974	0.119156	6.49351	0	6.49351	0.02475	1	0
3	7	0.1815	27.5482	0.0578512	11.0193	0	0	0.2499	2	0
3	7	0.24875	24.1206	0.0757789	4.0201	0	4.0201	0.12665	1	0
3	7	0.23525	25.5048	0.0739639	0	4.2508	8.50159	0.14725	0	1
3	7	0.2867	24.4158	0.149808	3.48797	3.48797	3.48797	0.1138	1	1
3	7	0.29715	23.5571	0.0787481	10.0959	0	6.73061	0.1471	3	0
3	7	0.2383	25.1783	0.0948384	12.5892	0	4.19639	0.1965	3	0
3	7	0.24645	24.3457	0.107527	4.05762	0	8.11524	0.1167	1	0
3	7	0.24425	24.565	0.0988741	4.09417	0	8.18833	0.06985	1	0
3	7	0.20035	24.9563	0.0998253	9.98253	0	9.98253	0.0738	2	0
3	7	0.2787	25.1166	0.0916756	7.17618	0	7.17618	0.16675	2	0
3	7	0.24815	24.1789	0.0991336	4.02982	0	4.02982	0.1644	1	0
3	7	0.1961	25.4972	0.100969	0	0	0	0.463	0	0
3	7	0.2469	24.3013	0.186918	8.10045	0	4.05022	0.1557	2	0
3	7	0.28755	24.3436	0.105547	10.433	0	3.47766	0.1617	3	0
3	7	0.29025	24.1171	0.112145	6.89061	0	6.89061	0.13955	2	0
3	7	0.24295	24.6964	0.128833	4.11607	0	16.4643	0.0474	1	0
3	7	0.187	26.738	0.0874332	0	0	5.34759	0.1814	0	0
3	7	0.251	23.9044	0.132869	3.98406	0	11.9522	0.0241	1	0
3	7	0.24485	24.5048	0.112109	0	0	4.08413	0.1353	0	0
3	7	0.29345	23.8541	0.119271	6.81547	0	6.81547	0.1292	2	0
3	7	0.25215	31.7271	0.195122	7.93179	0	7.93179	0.01105	2	0
3	7	0.34415	23.2457	0.127851	8.71713	0	8.71713	0.0987	3	0
3	7	0.2474	24.2522	0.0822555	8.08407	0	12.1261	0.0131	2	0
3	7	0.2411	24.8859	0.125881	4.14766	4.14766	8.29531	0.13105	1	1
3	7	0.29475	23.7489	0.0544529	10.1781	0	10.1781	0.11925	3	0
3	7	0.2481	20.1532	0.0906892	8.06127	0	0	0.30135	2	0
3	7	0.2872	24.3733	0.139102	3.48189	0	0	0.3202	1	0
3	7	0.25035	23.9664	0.133613	11.9832	0	3.99441	0.20815	3	0
3	7	0.20495	19.517	0.119053	0	0	4.87924	0.1435	0	0
3	7	0.2197	22.7583	0.140646	4.55166	4.55166	0	0.4352	1	1
3	7	0.31295	22.3678	0.127976	6.3908	3.1954	3.1954	0.2223	2	1
3	7	0.25955	23.1169	0.130803	3.85282	3.85282	3.85282	0.1294	1	1
3	7	0.4232	18.9036	0.0676985	4.7259	0	4.7259	0.0986	2	0
3	7	0.1564	25.5754	0.128197	6.39386	0	0	0.18375	1	0
3	7	0.23765	29.4551	0.148959	8.41574	0	12.6236	0.0498	2	0
3	7	0.59245	20.2549	0.0723268	6.75162	0	5.06372	0.1864	4	0
3	7	0.19745	25.3229	0.05647	10.1291	0	5.06457	0.09485	2	0
3	7	0.39245	22.9329	0.0793732	7.64429	2.5481	7.64429	0.17295	3	1
3	7	0.4025	22.3602	0.126708	7.45342	0	4.96894	0.16495	3	0
3	7	0.29365	23.8379	0.103865	3.40541	0	3.40541	0.0096	1	0
3	7	0.34185	23.4021	0.11116	2.92526	0	0	0.48	1	0
3	7	0.2432	24.6711	0.0497533	8.22368	0	0	0.64965	2	0
3	7	0.3017	23.2019	0.128439	0	3.31455	0	0.98755	0	1
3	7	0.26005	23.0725	0.08383	0	0	7.69083	0.0886	0	0
3	7	0.15995	25.0078	0.057518	6.25195	0	0	0.17155	1	0
3	7	0.3009	23.2635	0.090894	13.2935	6.64673	3.32336	0.207	4	2
3	7	0.2992	23.3957	0.126838	10.0267	3.34225	6.68449	0.1127	3	1
3	7	0.2023	24.7158	0.09565	4.94315	0	0	0.20565	1	0
3	7	0.31815	25.1454	0.140657	0	0	6.28634	0.12195	0	0
3	7	0.3955	22.756	0.137042	2.52845	0	7.58534	0.0981	1	0
3	7	0.2427	24.7219	0.176761	4.12031	4.12031	0	1.1065	1	1
3	7	0.36475	21.9328	0.0764907	0	0	5.48321	0.14605	0	0
3	7	0.3987	20.0652	0.076624	0	2.50815	5.0163	0.1333	0	1
3	7	0.34885	22.9325	0.10291	5.73312	5.73312	14.3328	0.08045	2	2
3	7	0.28855	24.2592	0.0625542	10.3968	0	3.4656	0.1544	3	0
3	7	0.33895	20.652	0.0750848	11.8012	2.95029	2.95029	0.22435	4	1
3	7	0.29295	23.8949	0.109746	3.41355	0	3.41355	0.12625	1	0
3	7	0.29005	24.1338	0.0720565	10.343	0	0	0.381	3	0
3	7	0.34305	20.4052	0.0660254	2.91503	2.91503	5.83005	0.11505	1	1
3	7	0.3636	22.0022	0.0761826	5.50055	2.75028	8.25083	0.0948	2	1
3	7	0.28815	24.2929	0.0997744	17.3521	3.47041	6.94083	0.1604	5	1
3	7	0.44085	20.4151	0.0937961	9.07338	2.26835	9.07338	0.06015	4	1
3	7	0.25485	23.5433	0.102021	0	0	3.92388	0.1913	0	0
3	7	0.30095	23.2597	0.0912112	6.64562	3.32281	3.32281	0.30005	2	1
3	7	0.25115	23.8901	0.125025	3.98168	3.98168	0	0.3527	1	1
3	7	0.3402	23.5156	0.0830394	8.81834	2.93945	5.87889	0.11595	3	1
3	7	0.2914	24.022	0.0799588	6.86342	3.43171	6.86342	0.09465	2	1
3	7	0.3319	24.1036	0.103043	12.0518	0	9.03887	0.12795	4	0
3	7	0.15245	26.2381	0.0577238	13.1191	6.55953	0	0.26405	2	1
3	7	0.2954	23.6967	0.115267	6.77048	0	10.1557	0.1352	2	0
3	7	0.28205	24.8183	0.0950186	3.54547	0	0	0.4416	1	0
3	7	0.34635	23.098	0.11217	5.77451	0	2.88725	0.0605	2	0
3	7	0.30865	22.6794	0.122793	0	0	3.23992	0.06295	0	0
3	7	0.35465	22.5575	0.136191	2.81968	2.81968	5.63936	0.06965	1	1
3	7	0.2476	24.2326	0.0761309	4.03877	4.03877	0	0.35	1	1
3	7	0.24245	24.7474	0.14106	12.3737	0	12.3737	0.0377	3	0
3	7	0.293	20.4778	0.0517065	10.2389	3.41297	6.82594	0.13845	3	1
3	7	0.25025	23.976	0.120879	0	3.996	7.99201	0.0871	0	1
3	7	0.3622	22.0872	0.120928	8.28272	2.76091	13.8045	0.0204	3	1
3	7	0.25695	23.3508	0.104884	11.6754	0	7.78362	0.05305	3	0
3	7	0.25255	23.7577	0.130469	3.95961	0	11.8788	0.15335	1	0
3	7	0.38865	23.1571	0.102534	7.71903	0	10.292	0.11615	3	0
3	7	0.30395	16.4501	0.0480342	6.58003	6.58003	13.1601	0.09165	2	2
3	7	0.26065	23.0194	0.126031	3.83656	0	11.5097	0.063	1	0
3	7	0.396	17.6768	0.0597222	10.101	5.05051	7.57576	0.04715	4	2
3	7	0.19735	25.3357	0.121611	5.06714	0	10.1343	0.1018	1	0
3	7	0.2107	18.9843	0.0643094	9.49217	4.74608	9.49217	0.07225	2	1
3	7	0.15595	25.6492	0.060917	0	0	0	0.16145	0	0
3	7	0.30285	19.8118	0.0858511	9.90589	0	6.60393	0.14975	3	0
3	7	0.39565	20.2199	0.0577531	2.52749	0	7.58246	0.1353	1	0
3	7	0.35755	22.3745	0.115648	11.1872	2.79681	5.59362	0.1412	4	1
3	7	0.2569	23.3554	0.0893344	7.78513	0	0	0.4985	2	0
3	7	0.24995	24.0048	0.0830166	4.0008	0	4.0008	0.0939	1	0
3	7	0.2575	19.4175	0.0693204	3.8835	0	3.8835	0.2242	1	0
3	7	0.20585	24.2895	0.0915715	0	0	9.71581	0.05135	0	0
3	7	0.2543	23.5942	0.104601	0	0	0	1.05625	0	0
3	7	0.30585	22.887	0.0684976	0	0	3.26958	0.3014	0	0
3	7	0.39745	20.1283	0.0611398	0	0	2.51604	0.21555	0	0
3	7	0.16045	24.9299	0.074478	0	0	6.23247	0.07145	0	0
3	7	0.34535	23.1649	0.131895	8.68684	2.89561	8.68684	0.03335	3	1
3	7	0.2941	23.8014	0.0778647	3.4002	0	3.4002	0.27805	1	0
3	7	0.30275	16.5153	0.0559868	6.60611	0	3.30306	0.15465	2	0
3	7	0.29815	23.4781	0.106322	3.35402	3.35402	6.70803	0.1144	1	1
3	7	0.3013	23.2327	0.0738467	0	0	0	1.6485	0	0
3	7	0.3024	23.1481	0.0912698	0	0	0	0.7586	0	0
3	7	0.312	22.4359	0.0932692	0	3.20513	0	1.2006	0	1
3	7	0.29595	23.6526	0.103058	0	0	0	0.4284	0	0
3	7	0.24875	20.1005	0.0747739	8.0402	0	4.0201	0.13485	2	0
3	7	0.29305	23.8867	0.106125	3.41239	0	0	0.6675	1	0
3	7	0.2095	23.8663	0.0599045	0	0	4.77327	0.08675	0	0
3	7	0.30955	16.1525	0.062187	3.2305	0	9.69149	0.0319	1	0
3	7	0.2521	23.8001	0.138437	7.93336	3.96668	3.96668	0.1566	2	1
3	7	0.2165	23.0947	0.103233	4.61894	0	0	0.25295	1	0
3	7	0.30115	16.603	0.0503072	3.3206	6.64121	9.96181	0.0717	1	2
3	7	0.22775	21.9539	0.0990121	13.1723	4.39078	17.5631	0.02955	3	1
3	7	0.2045	24.4499	0.0831296	0	4.88998	4.88998	0.0353	0	1
3	7	0.254	19.685	0.0584646	11.811	7.87402	7.87402	0.103	3	2
3	7	0.3035	16.4745	0.0779242	9.88468	6.58979	9.88468	0.0627	3	2
3	7	0.18335	21.8162	0.0349059	0	0	0	0.25895	0	0
3	7	0.48895	22.4972	0.0923407	6.1356	0	4.0904	0.12185	3	0
3	7	0.3371	23.7318	0.119994	5.93296	0	5.93296	0.036	2	0
3	7	0.25405	19.6812	0.0964377	3.93623	3.93623	3.93623	0.1541	1	1
3	7	0.2561	23.4283	0.0898087	0	0	3.90472	0.1108	0	0
3	7	0.2541	23.6128	0.145612	3.93546	3.93546	7.87092	0.152	1	1
3	7	0.518	17.3745	0.0953668	13.5135	5.79151	7.72201	0.01045	7	3
3	7	0.24945	20.0441	0.0853879	4.00882	8.01764	4.00882	0.1511	1	2
3	7	0.2554	23.4926	0.0743931	11.7463	3.91543	11.7463	0.00905	3	1
3	7	0.20635	24.2307	0.102011	4.84614	0	9.69227	0.02945	1	0
3	7	0.3029	23.1099	0.15005	13.2057	0	3.30142	0.03295	4	0
2	7	0.31995	18.7529	0.0564151	0	9.37647	0	0.1044	0	3
2	7	0.24915	16.0546	0.097933	16.0546	20.0682	32.1092	0.0694	4	5
2	7	0.13815	21.7155	0.112921	7.23851	0	21.7155	0.00365	1	0
2	7	0.60825	14.7965	0.0657624	23.0169	11.5084	24.6609	0.1585	14	7
2	7	0.29415	20.3978	0.195988	27.197	6.79925	23.7974	0.1275	8	2
2	7	0.3653	19.1623	0.129072	24.6373	8.21243	19.1623	0.1087	9	3
2	7	0.47465	18.9613	0.118824	6.32045	6.32045	10.5341	0.22955	3	3
2	7	0.8487	15.3175	0.0871333	27.1003	7.06964	24.7437	0.1688	23	6
2	7	0.8286	12.0685	0.042964	13.2754	7.24113	26.5508	0.1203	11	6
2	7	0.4931	18.2519	0.0789901	36.5038	8.11194	14.1959	0.0028	18	4
2	7	0.331	21.148	0.128248	24.1692	9.06344	9.06344	0.1379	8	3
2	7	0.43645	18.3297	0.0517814	9.16485	2.29121	25.2033	0.07835	4	1
2	7	0.41675	19.1962	0.0929814	14.3971	4.79904	9.59808	0.0305	6	2
2	7	0.3078	12.9955	0.0164068	12.9955	12.9955	22.742	0.00185	4	4
2	7	0.46345	15.1041	0.0939691	21.5773	0	34.5237	0.19465	10	0
2	7	0.575	17.3913	0.165391	36.5217	3.47826	24.3478	0.06275	21	2
2	7	0.5243	19.073	0.0982262	11.4438	1.9073	19.073	0.08765	6	1
2	7	0.5255	19.0295	0.188107	26.6413	5.70885	24.7383	0.009	14	3
2	7	0.5895	16.9635	0.117557	15.2672	8.48176	27.1416	0.14355	9	5
2	7	0.5535	14.4535	0.0594399	12.6468	3.61337	5.42005	0.1118	7	2
2	7	0.4891	18.4011	0.161623	10.2229	6.13371	32.7131	0.055	5	3
2	7	0.4938	18.226	0.115735	10.1256	0	24.3013	0.0761	5	0
2	7	0.6752	17.7725	0.12811	20.7346	2.96209	28.1398	0.0575	14	2
2	7	0.72915	17.829	0.102105	20.5719	1.37146	20.5719	0.06825	15	1
2	7	0.56805	15.8437	0.105272	8.80204	0	17.6041	0.0594	5	0
2	7	0.6388	18.7852	0.134941	14.0889	1.56544	10.958	0.11955	9	1
2	7	1.0422	15.3521	0.0794473	12.4736	5.75705	11.5141	0.105	13	6
2	7	0.43425	18.4226	0.105009	25.331	0	18.4226	0.08015	11	0
2	7	0.2134	18.7441	0.0342081	4.68604	4.68604	14.0581	0.0852	1	1
2	7	0.7611	14.4528	0.101892	9.19721	6.56944	18.3944	0.165	7	5
2	7	0.43995	18.1839	0.128537	20.4569	4.54597	18.1839	0.01995	9	2
2	7	0.3141	19.1022	0.156956	15.9185	3.1837	6.3674	0.1488	5	1
2	7	0.62085	17.7176	0.105984	22.5497	4.83209	24.1604	0.0501	14	3
2	7	0.2983	20.114	0.097888	6.70466	0	3.35233	0.08375	2	0
2	7	0.3778	18.5283	0.0946268	10.5876	0	15.8814	0.09005	4	0
2	7	0.53615	18.6515	0.121235	16.7863	0	13.056	0.1973	9	0
2	7	0.6733	16.3374	0.176964	14.8522	2.97044	20.7931	0.13415	10	2
2	7	1.10825	17.1441	0.11649	22.5581	1.80465	19.8511	0.14375	25	2
2	7	0.84535	16.5612	0.0914414	11.8294	3.54883	22.4759	0.1216	10	3
2	7	0.9776	15.3437	0.11073	20.4583	5.11457	11.252	0.0867	20	5
2	7	0.9716	15.4385	0.0894401	8.23384	1.02923	19.5554	0.09285	8	1
2	7	1.3071	16.0661	0.100413	15.301	1.5301	16.0661	0.00625	20	2
2	7	0.5933	18.5404	0.157509	15.1694	1.68549	23.5968	0.1534	9	1
2	7	0.59945	18.3502	0.133122	10.0092	1.6682	15.0138	0.1664	6	1
2	7	0.4755	18.9274	0.11714	25.2366	0	18.9274	0.0506	12	0
2	7	0.37815	18.5112	0.179558	15.8667	2.64445	23.8001	0.10635	6	1
2	7	0.4757	18.9195	0.117826	14.7152	2.10217	12.613	0.0669	7	1
2	7	0.74115	16.1911	0.0953923	12.1433	2.69851	25.6358	0.0535	9	2
2	7	0.5405	16.6512	0.105735	12.951	1.85014	9.25069	0.00195	7	1
2	7	0.3038	19.7498	0.105497	9.87492	3.29164	6.58328	0.1057	3	1
2	7	0.45385	17.627	0.0838383	6.61011	0	17.627	0.1004	3	0
2	7	0.4881	18.4388	0.125282	12.2926	2.04876	2.04876	0.34035	6	1
2	7	0.5748	17.3974	0.0838553	1.73974	5.21921	19.1371	0.2122	1	3
2	7	1.28595	17.108	0.125316	15.5527	0	13.9974	0.03575	20	0
2	7	0.74475	17.4555	0.157637	9.39913	1.34273	13.4273	0.1762	7	1
2	7	0.96065	17.6964	0.129912	10.4096	2.08192	11.4506	0.1587	10	2
2	7	0.74845	17.3692	0.132741	9.35266	2.67219	14.697	0.07785	7	2
2	7	1.16735	16.2762	0.130895	12.8496	0.856641	17.1328	0.0016	15	1
2	7	0.4833	18.622	0.143906	14.4838	2.06911	6.20732	0.10855	7	1
2	7	0.3069	19.5503	0.0715217	13.0336	3.25839	3.25839	0.19605	4	1
2	7	0.4877	18.454	0.114415	14.3531	2.05044	8.20176	0.1595	7	1
2	7	0.60865	18.0728	0.13875	13.1438	0	21.3587	0.0632	8	0
2	7	0.43495	18.3929	0.125302	9.19646	0	0	0.48195	4	0
2	7	0.39165	17.8731	0.111579	0	5.1066	22.9797	0.1004	0	2
2	7	0.3595	19.4715	0.113769	19.4715	0	19.4715	0.03885	7	0
2	7	0.55565	19.7966	0.110771	23.396	3.59939	14.3976	0.05385	13	2
2	7	0.615	17.8862	0.153902	24.3902	1.62602	22.7642	0.12695	15	1
2	7	0.2522	19.8255	0.0975416	3.96511	7.93021	7.93021	0.00355	1	2
2	7	0.1809	16.5837	0.0193477	0	0	11.0558	0.076	0	0
2	7	0.5793	17.2622	0.123684	13.8098	3.45244	12.0835	0.323	8	2
2	7	0.30835	19.4584	0.105562	12.9723	3.24307	6.48614	0.03885	4	1
2	7	0.277	10.8303	0.00451264	0	0	10.8303	0.07605	0	0
2	7	0.7192	13.9043	0.115197	16.6852	2.78087	12.5139	0.2535	12	2
2	7	0.79195	16.4152	0.086811	12.6271	3.78812	12.6271	0.09005	10	3
2	7	0.2527	23.7436	0.0797388	3.95726	0	7.91452	0.21475	1	0
2	7	0.6262	17.5663	0.123922	15.9693	3.19387	15.9693	0.1513	10	2
2	7	0.5696	17.5562	0.119119	7.02247	1.75562	3.51124	0.26085	4	1
2	7	0.3314	18.105	0.146198	3.0175	9.0525	27.1575	0.1058	1	3
2	7	2.0434	14.192	0.0868406	13.2133	2.4469	8.80885	0.0972	27	5
2	7	0.3219	18.6393	0.191053	12.4262	3.10655	15.5328	0.04875	4	1
2	7	0.35955	19.4688	0.227924	13.9063	0	16.6875	0.0935	5	0
2	7	0.43535	20.673	0.139083	9.18801	0	6.89101	0.046	4	0
2	7	0.40545	17.2648	0.118634	17.2648	2.4664	14.7984	0.0722	7	1
2	7	0.56115	16.0385	0.110398	8.91027	0	17.8205	0.207	5	0
2	7	0.56025	17.8492	0.108344	16.0643	1.78492	3.56983	0.1767	9	1
2	7	0.3195	18.7793	0.13662	6.25978	3.12989	12.5196	0.11175	2	1
2	7	0.4373	16.0073	0.0817517	22.8676	0	9.14704	0.1373	10	0
2	7	0.50685	17.7567	0.0980566	17.7567	0	13.8108	0.13415	9	0
2	7	0.37085	18.8756	0.11204	8.08952	0	2.69651	0.22045	3	0
2	7	0.2485	20.1207	0.147082	4.02414	4.02414	8.04829	0.1386	1	1
2	7	0.8233	17.0047	0.101846	7.28774	1.21462	13.3609	0.04225	6	1
2	7	0.41335	19.3541	0.122052	9.67703	0	14.5155	0.1443	4	0
2	7	0.3662	19.1152	0.14036	16.3845	0	8.19224	0.18715	6	0
2	7	0.61615	17.8528	0.118883	11.3609	1.62298	16.2298	0.1442	7	1
2	7	0.4284	18.6741	0.117297	9.33707	2.33427	11.6713	0.2016	4	1
2	7	1.6799	16.6677	0.0942616	10.7149	7.73856	16.6677	0.1003	18	13
2	7	0.50755	17.7322	0.117722	19.7025	1.97025	21.6727	0.13305	10	1
2	7	0.4268	18.7441	0.137769	9.37207	0	14.0581	0.15035	4	0
2	7	0.55735	17.942	0.162465	17.942	1.7942	16.1478	0.13025	10	1
2	7	0.68165	17.6043	0.108927	16.1373	5.86811	11.7362	0.07305	11	4
2	7	0.56295	17.7636	0.108358	15.9872	1.77636	15.9872	0.1382	9	1
2	7	1.4908	16.7695	0.126643	14.0864	2.68312	16.0987	0.0354	21	4
2	7	0.68425	16.076	0.108513	17.5374	2.92291	11.6916	0.0118	12	2
2	7	0.85495	15.2056	0.0905901	10.5269	3.50898	24.5628	0.0461	9	3
2	7	0.5573	16.1493	0.102727	14.3549	0	23.3268	0.1212	8	0
2	7	0.3969	15.1172	0.164651	5.03905	5.03905	17.6367	0.0214	2	2
2	7	0.34655	20.1991	0.130573	40.3982	0	20.1991	0.1001	14	0
2	7	0.38025	15.7791	0.0470743	21.0388	2.62985	5.2597	0.08515	8	1
2	7	0.3104	16.1082	0.0678157	12.8866	0	9.66495	0.2812	4	0
2	7	0.49435	18.2057	0.0639223	12.1371	2.02286	16.1829	0.004	6	1
2	7	0.4907	18.3411	0.0912981	10.1895	0	14.2653	0.00905	5	0
2	7	0.1859	21.5169	0.102205	0	0	5.37924	0.05325	0	0
2	7	0.53985	18.5237	0.0984533	20.376	0	0	0.80725	11	0
2	7	0.5372	16.7535	0.117647	0	0	18.615	0.06585	0	0
2	7	0.24965	20.028	0.138394	16.0224	0	8.01122	0.0889	4	0
2	7	0.43585	18.3549	0.107147	20.6493	6.8831	11.4718	0.1792	9	3
2	7	0.55635	17.9743	0.141997	21.5692	1.79743	7.18972	0.1058	12	1
2	7	0.1256	23.8854	0.0589172	0	0	0	0.15615	0	0
2	7	0.51325	17.5353	0.084754	11.6902	0	21.4321	0.09145	6	0
2	7	0.8638	17.3651	0.165027	17.3651	4.6307	16.2075	0.19475	15	4
2	7	0.7001	15.712	0.118697	21.4255	5.71347	24.2822	0.15745	15	4
2	7	0.4309	18.5658	0.126712	11.6036	6.96217	6.96217	0.01145	5	3
2	7	0.32545	18.436	0.104471	9.21801	0	15.3633	0.0851	3	0
2	7	0.62415	16.0218	0.0755427	11.2153	1.60218	17.624	0.0884	7	1
2	7	0.49535	18.169	0.121026	16.1502	2.01877	8.0751	0.12225	8	1
2	7	0.42355	18.888	0.116869	21.249	0	21.249	0.0845	9	0
2	7	0.3768	18.5775	0.0778928	13.2696	0	7.96178	0.2277	5	0
2	7	0.70295	17.0709	0.0858525	9.95803	0	14.2258	0.0816	7	0
2	7	0.88255	16.9962	0.0934791	10.1977	1.13308	14.73	0.28515	9	1
2	7	0.66715	17.987	0.138724	11.9913	0	16.488	0.09435	8	0
2	7	0.6313	12.6723	0.0468082	11.0882	6.33613	12.6723	0.04855	7	4
2	7	0.62135	16.094	0.117164	16.094	1.6094	6.4376	0.14695	10	1
2	7	1.217	16.4339	0.10378	9.03862	0	7.39523	0.1248	11	0
2	7	0.37695	15.9172	0.0754742	5.30574	0	15.9172	0.0307	2	0
2	7	0.3051	16.3881	0.067355	16.3881	0	19.6657	0.07195	5	0
2	7	0.5061	17.783	0.0959297	13.8313	0	7.90358	0.2113	7	0
2	7	0.24545	20.3707	0.107354	4.07415	0	12.2224	0.15275	1	0
2	7	0.3634	19.2625	0.125344	13.7589	0	11.0072	0.1894	5	0
2	7	0.43775	18.2753	0.113878	13.7065	0	4.56882	0.1016	6	0
2	7	0.1494	20.0803	0.0143909	6.69344	6.69344	0	0.17585	1	1
2	7	0.87345	13.7386	0.072414	12.5937	2.28977	20.6079	0.08585	11	2
2	7	0.6766	13.3018	0.0883092	4.43393	1.47798	2.95596	0.05745	3	1
2	7	0.571	15.7618	0.114448	3.50263	1.75131	12.2592	0.13025	2	1
2	7	0.4045	19.7775	0.0991347	14.8331	0	9.88875	0.22235	6	0
2	7	0.73635	17.6546	0.0867794	10.8644	2.7161	16.2966	0.168	8	2
2	7	0.5522	16.2984	0.151032	21.7313	0	14.4875	0.0419	12	0
2	7	0.4529	17.6639	0.179068	15.456	2.20799	19.8719	0.09505	7	1
2	7	0.37115	18.8603	0.118416	24.249	0	13.4716	0.1335	9	0
2	7	0.4362	18.3402	0.140646	18.3402	0	13.7552	0.15825	8	0
2	7	0.337	17.8042	0.071365	5.93472	2.96736	8.90208	0.06475	2	1
2	7	0.37265	18.7844	0.106132	24.1513	2.68348	21.4679	0.1149	9	1
2	7	0.5968	18.4316	0.132038	16.756	5.02681	8.37802	0.00505	10	3
2	7	0.39255	17.8321	0.0966756	15.2847	0	2.54745	0.33185	6	0
2	7	0.35735	13.9919	0.0873094	2.79838	2.79838	2.79838	0.1016	1	1
2	7	0.5685	17.5901	0.0602463	14.0721	3.51803	19.3492	0.22545	8	2
2	7	0.36035	19.4256	0.115998	11.1003	0	22.2006	0.0665	4	0
2	7	0.9918	15.124	0.108893	16.1323	0	28.2315	0.07575	16	0
2	7	0.4012	14.9551	0.066675	9.97009	0	2.49252	0.1709	4	0
2	7	0.3286	18.2593	0.0995131	3.04321	0	15.2161	0.12705	1	0
2	7	0.37765	18.5357	0.0793062	15.8877	0	2.64795	0.16935	6	0
2	7	0.5299	16.9843	0.106058	15.0972	0	5.66145	0.0572	8	0
2	7	0.25185	19.8531	0.0974787	7.94123	0	0	0.37105	2	0
2	7	0.24415	20.4792	0.0585706	20.4792	0	4.09584	0.1841	5	0
2	7	0.5135	13.6319	0.071665	3.89484	0	5.84226	0.2746	2	0
2	7	0.14375	20.8696	0.0716522	13.913	0	0	0.21135	2	0
2	7	0.89255	15.6854	0.0864938	11.2039	4.48154	12.3242	0.1152	10	4
2	7	0.2921	20.5409	0.129579	20.5409	0	13.6939	0.18935	6	0
2	7	0.58875	16.9851	0.0884076	13.5881	3.39703	16.9851	0.1736	8	2
2	7	0.3513	19.926	0.120125	2.84657	0	2.84657	0.13095	1	0
2	7	0.46505	19.3528	0.107515	17.2025	0	8.60123	0.2579	8	0
2	7	0.294	20.4082	0.108163	20.4082	3.40136	3.40136	0.1884	6	1
2	7	0.4896	18.3824	0.0709763	14.2974	2.04248	4.08497	0.0359	7	1
2	7	0.30635	16.3212	0.0856863	3.26424	0	19.5854	0.0176	1	0
2	7	0.3645	19.2044	0.12085	10.9739	0	5.48697	0.1787	4	0
2	7	0.2412	20.7297	0.13267	20.7297	0	0	0.2589	5	0
2	7	0.28305	21.1977	0.129129	14.1318	0	7.06589	0.2159	4	0
2	7	0.20275	24.6609	0.0527744	0	4.93218	0	0.30195	0	1
2	7	0.25475	19.6271	0.103042	15.7017	0	31.4033	0.06215	4	0
2	7	0.41185	19.4245	0.0933592	14.5684	4.85614	14.5684	0.1153	6	2
2	7	0.6694	16.4326	0.0979235	13.4449	7.46938	26.8898	0.00255	9	5
2	7	0.92065	15.2066	0.0998751	23.8962	1.08619	11.9481	0.11605	22	1
2	7	0.4344	18.4162	0.118785	20.7182	0	4.60405	0.415	9	0
2	7	0.35785	19.5613	0.0824368	8.3834	0	22.3557	0.06465	3	0
2	7	0.9962	14.0534	0.0942582	19.0725	1.00381	27.103	0.1766	19	1
2	7	0.3076	19.5059	0.132802	22.7568	0	6.50195	0.1427	7	0
2	7	0.3886	18.0134	0.104864	7.72002	0	7.72002	0.2349	3	0
2	7	0.96415	16.5949	0.115957	10.3718	2.07437	11.409	0.1782	10	2
2	7	0.3763	23.9171	0.144034	15.9447	7.97236	18.6022	0.25155	6	3
2	7	0.70475	17.0273	0.108194	12.7705	4.25683	22.7031	0.0277	9	3
2	7	0.84215	17.8116	0.118862	9.4995	3.56231	17.8116	0.03035	8	3
2	7	0.75415	17.238	0.144268	14.586	0	13.26	0.0867	11	0
2	7	0.54085	18.4894	0.107886	12.9426	0	20.3384	0.0832	7	0
2	7	1.0977	16.3979	0.122848	12.7539	2.73299	11.8429	0.1312	14	3
2	7	0.5897	18.6536	0.132186	13.5662	0	11.8704	0.05765	8	0
2	7	0.53755	18.6029	0.0963631	14.8823	0	20.4632	0.0608	8	0
2	7	0.3832	18.2672	0.145877	10.4384	0	2.6096	0.21315	4	0
2	7	0.2523	19.8177	0.101268	11.8906	0	11.8906	0.2173	3	0
2	7	0.2421	20.6526	0.0582404	20.6526	0	8.26105	0.1324	5	0
2	7	0.2057	19.4458	0.0848323	48.6145	4.86145	24.3072	0.0485	10	1
2	7	0.65555	15.2544	0.0739837	4.57631	0	12.2035	0.17305	3	0
2	7	0.36535	19.1597	0.113453	2.7371	0	35.5823	0.0074	1	0
2	7	0.46885	19.1959	0.090434	8.53151	0	8.53151	0.27325	4	0
2	7	0.59785	18.3993	0.112905	26.7626	3.34532	20.0719	0.1008	16	2
2	7	0.29465	20.3631	0.14933	20.3631	0	13.5754	0.07295	6	0
2	7	0.4579	17.4711	0.120114	24.0227	2.18388	17.4711	0.0943	11	1
2	7	0.35795	16.7621	0.0831122	11.1747	0	22.3495	0.0111	4	0
2	7	0.39675	17.6434	0.0795211	10.0819	2.52048	7.56144	0.307	4	1
2	7	0.52655	17.0924	0.10189	7.59662	3.79831	13.2941	0.05565	4	2
2	7	0.35525	19.7044	0.12822	16.8895	2.81492	5.62984	0.0648	6	1
2	7	0.7201	16.6644	0.105749	15.2757	1.3887	12.4983	0.03965	11	1
2	7	0.47415	18.9813	0.143942	8.43615	0	12.6542	0.0613	4	0
2	7	0.2985	20.1005	0.119933	13.4003	0	3.35008	0.1573	4	0
2	7	0.1919	20.8442	0.100052	0	0	5.21105	0.18525	0	0
2	7	0.5119	17.5816	0.11555	15.6281	0	15.6281	0.1629	8	0
2	7	0.18805	21.2709	0.0834884	15.9532	5.31773	0	0.3093	3	1
2	7	0.7698	14.2894	0.0828137	6.49519	1.29904	22.0837	0.0922	5	1
2	7	0.3513	19.926	0.136208	25.6191	2.84657	34.1588	0.1067	9	1
2	7	0.29905	20.0635	0.0799197	30.0953	0	6.68784	0.18975	9	0
2	7	0.1785	22.409	0.0837535	0	0	0	0.26955	0	0
2	7	0.331	18.1269	0.0611782	9.06344	6.0423	15.1057	0.07395	3	2
2	7	0.4006	17.4738	0.127059	14.9775	0	9.98502	0.1986	6	0
2	7	0.7404	13.5062	0.0641545	9.45435	2.70124	14.8568	0.1785	7	2
2	7	0.3346	20.9205	0.129707	29.8864	5.97729	26.8978	0.049	10	2
2	7	0.2516	19.8728	0.160572	11.9237	3.97456	3.97456	0.1787	3	1
2	7	0.55455	18.0326	0.0678929	7.21306	0	18.0326	0.09705	4	0
2	7	0.41865	19.109	0.135913	21.4977	0	14.3318	0.0378	9	0
2	7	0.4727	19.0396	0.156759	14.8085	0	10.5775	0.08935	7	0
2	7	0.45825	19.6399	0.164975	26.1866	2.18221	6.54664	0.1826	12	1
2	7	0.6136	17.927	0.121089	17.927	3.25945	21.1864	0.04985	11	2
2	7	0.31	19.3548	0.0932258	19.3548	0	19.3548	0.13275	6	0
2	7	0.48095	18.713	0.111966	14.5545	0	14.5545	0.0839	7	0
2	7	0.39465	20.2711	0.107564	27.8728	0	10.1356	0.1756	11	0
2	7	0.46505	19.3528	0.153854	17.2025	2.15031	15.0521	0.07915	8	1
2	7	0.423	18.9125	0.176123	14.1844	2.36407	16.5485	0.09355	6	1
2	7	0.52715	18.9699	0.117044	15.1759	0	20.8669	0.07845	8	0
2	7	0.42385	18.8746	0.125634	16.5153	2.35933	28.3119	0.06565	7	1
2	7	0.54225	18.4417	0.0925772	25.8183	1.84417	18.4417	0.0439	14	1
2	7	0.4845	18.5759	0.13323	2.06398	0	20.6398	0.0616	1	0
2	7	0.30265	19.8249	0.0973071	16.5207	0	9.91244	0.1708	5	0
2	7	0.66865	16.4511	0.117251	28.4155	1.49555	23.9288	0.0383	19	1
2	7	0.47625	18.8976	0.0865092	8.39895	4.19948	20.9974	0.15555	4	2
2	7	0.35755	19.5777	0.136205	22.3745	0	8.39043	0.1271	8	0
2	7	0.36315	19.2758	0.0764147	19.2758	2.75368	13.7684	0.1569	7	1
2	7	0.523	15.2964	0.10717	15.2964	0	19.1205	0.1108	8	0
2	7	0.184	21.7391	0.0535326	5.43478	0	5.43478	0.0981	1	0
2	7	0.29445	20.377	0.130413	13.5846	0	13.5846	0.16355	4	0
2	7	0.609	18.0624	0.127258	19.7044	1.64204	24.6305	0.06435	12	1
2	7	0.5397	14.823	0.101167	25.9403	0	20.3817	0.1751	14	0
2	7	0.3717	16.1421	0.0743879	13.4517	2.69034	13.4517	0.06985	5	1
2	7	0.1963	20.377	0.085838	10.1885	0	5.09424	0.1458	2	0
2	7	0.1223	24.5298	0.0858545	0	8.17661	8.17661	0.019	0	1
2	7	0.6968	15.7865	0.076062	12.9162	10.0459	33.008	0.00795	9	7
2	7	0.69485	12.9524	0.0592214	12.9524	2.87832	5.75664	0.43515	9	2
2	7	0.1968	20.3252	0.0551321	0	5.0813	15.2439	0.01915	0	1
2	7	0.48175	18.6819	0.111884	14.5304	0	2.07577	0.41065	7	0
2	7	0.27395	10.9509	0.00401533	0	3.6503	3.6503	0.1179	0	1
2	7	0.2384	20.9732	0.0920721	4.19463	4.19463	33.557	0.0435	1	1
2	7	0.5973	18.4162	0.131425	10.0452	3.3484	5.0226	0.03355	6	2
2	7	0.31955	18.7764	0.131278	9.3882	3.1294	25.0352	0.053	3	1
2	7	0.7731	16.8154	0.139374	21.9894	0	16.8154	0.1594	17	0
2	7	0.5005	15.984	0.106394	19.98	3.996	15.984	0.1335	10	2
2	7	0.4431	20.3114	0.150192	6.77048	2.25683	9.02731	0.20695	3	1
2	7	0.40775	19.6199	0.0908645	7.35745	0	17.1674	0.2094	3	0
2	7	0.80715	13.6282	0.100291	22.3007	8.67249	24.7785	0.0195	18	7
2	7	0.3589	19.504	0.11577	13.9315	0	8.35887	0.1571	5	0
2	7	0.6672	17.9856	0.102143	7.494	1.4988	20.9832	0.11905	5	1
2	7	0.48305	18.6316	0.12359	10.3509	2.07018	12.4211	0.0203	5	1
2	7	0.1882	21.254	0.0366631	21.254	5.3135	15.9405	0.09275	4	1
2	7	0.47405	14.7664	0.0841683	25.3138	0	0	0.54165	12	0
2	7	0.3744	18.6966	0.132746	0	8.01282	24.0385	0.09975	0	3
2	7	0.43745	18.2878	0.109384	9.1439	4.57195	16.0018	0.14285	4	2
2	7	0.46045	17.3743	0.123249	21.7179	2.17179	8.68715	0.0544	10	1
2	7	0.4387	15.9562	0.103032	13.6768	0	13.6768	0.08795	6	0
2	7	0.4466	17.9131	0.0657188	13.4348	6.71742	8.95656	0.1551	6	3
2	7	0.53655	16.7738	0.0626223	3.72752	0	20.5014	0.06015	2	0
2	7	0.432	18.5185	0.0981481	9.25926	4.62963	6.94444	0.15565	4	2
2	7	0.9036	14.3869	0.0458167	16.6003	1.10668	21.027	0.17135	15	1
2	7	0.4331	20.7804	0.0948973	16.1625	0	13.8536	0.0025	7	0
2	7	0.1263	23.753	0.137767	7.91766	0	0	0.1502	1	0
2	7	0.5978	18.4008	0.0914185	28.4376	3.3456	18.4008	0.09275	17	2
2	7	0.5332	15.0038	0.0597337	15.0038	3.75094	9.37734	0.0719	8	2
2	7	0.29875	20.0837	0.0912134	6.69456	3.34728	10.0418	0.10155	2	1
2	7	0.30135	19.9104	0.0856147	16.592	0	6.6368	0.1213	5	0
2	7	0.36585	16.4002	0.0791308	10.9334	2.73336	13.6668	0.184	4	1
2	7	0.24625	20.3046	0.0895431	8.12183	4.06091	4.06091	0.1741	2	1
2	7	0.9091	14.2999	0.096139	14.2999	2.19998	20.8998	0.1938	13	2
2	7	0.45405	17.6192	0.0684947	0	11.012	22.024	0.0765	0	5
2	7	0.36295	19.2864	0.0892685	16.5312	0	22.0416	0.12445	6	0
2	7	0.34275	17.5055	0.133917	11.6703	0	5.83516	0.25315	4	0
2	7	0.59605	16.7771	0.106786	11.744	3.35542	0	0.82055	7	2
2	7	0.3963	17.6634	0.0767096	0	0	22.7101	0.00335	0	0
2	7	0.47105	19.1063	0.0889502	6.36875	0	12.7375	0.0414	3	0
2	7	0.6756	14.8017	0.0737123	11.8413	5.92066	7.40083	0.28085	8	4
2	7	0.78825	15.2236	0.0836029	11.4177	1.26863	17.7609	0.0382	9	1
2	7	0.4752	18.9394	0.110059	16.835	0	21.0438	0.0761	8	0
2	7	0.61955	14.5267	0.0586716	17.7548	1.61407	9.68445	0.0548	11	1
2	7	0.45465	19.7954	0.12933	13.197	4.39899	21.9949	0.117	6	2
2	7	0.31635	18.9663	0.155366	22.1274	3.16106	6.32211	0.11915	7	1
2	7	0.8338	11.9933	0.0537299	9.59463	2.39866	16.7906	0.15985	8	2
2	7	0.42665	18.7507	0.114145	14.063	2.34384	7.03152	0.19905	6	1
2	7	0.44025	18.1715	0.134015	11.3572	2.27144	6.81431	0.1871	5	1
2	7	0.6383	15.6666	0.0726931	15.6666	3.13332	21.9333	0.1197	10	2
2	7	0.4805	16.6493	0.098127	16.6493	0	31.2175	0.00655	8	0
2	7	0.3088	19.4301	0.120628	25.9067	0	25.9067	0.1528	8	0
2	7	0.4009	17.4607	0.0759541	24.9439	7.48316	24.9439	0.06055	10	3
2	7	0.6226	16.0617	0.0768551	19.274	0	6.42467	0.37975	12	0
2	7	0.5523	16.2955	0.0538657	19.9167	1.81061	19.9167	0.0132	11	1
2	7	0.92745	18.3298	0.112351	25.8774	1.07823	9.70403	0.10595	24	1
2	7	0.511	15.6556	0.0680039	11.7417	3.91389	11.7417	0.11695	6	2
2	7	0.1786	22.3964	0.0795073	5.5991	5.5991	5.5991	0.15305	1	1
2	7	0.3356	20.8582	0.0847735	17.8784	2.97974	8.93921	0.23995	6	1
2	7	0.24495	20.4123	0.106144	12.2474	8.16493	16.3299	0.0875	3	2
2	7	0.37645	18.5948	0.0719883	26.564	5.31279	7.96919	0.2357	10	2
2	7	0.42515	18.8169	0.121604	25.8732	0	14.1127	0.02925	11	0
2	7	0.1847	21.6567	0.172442	10.8284	0	5.41419	0.05285	2	0
2	7	0.87795	13.6682	0.0780227	12.5292	2.27803	19.3633	0.02295	11	2
2	7	0.54685	16.4579	0.117948	23.7725	1.82866	20.1152	0.0031	13	1
2	7	0.5981	18.3916	0.138355	5.01588	0	23.4075	0.1755	3	0
2	7	0.4084	19.5886	0.134549	12.2429	2.44858	24.4858	0.056	5	1
2	7	0.5495	18.1984	0.114377	20.0182	1.81984	10.919	0.215	11	1
2	7	0.5986	16.7056	0.130388	3.34113	3.34113	16.7056	0.0317	2	2
2	7	0.86065	15.1049	0.0970778	12.781	2.32383	19.7525	0.03255	11	2
2	7	0.33105	18.1242	0.129588	12.0828	3.02069	6.04138	0.2883	4	1
2	7	0.60385	14.9044	0.0837956	13.2483	1.65604	9.93624	0.19705	8	1
2	7	0.3578	11.1794	0.0289268	16.7691	27.9486	22.3589	0.15355	6	10
2	7	0.531	15.0659	0.0759887	32.0151	7.53296	20.7156	0.07755	17	4
2	7	0.6657	18.0261	0.0889289	19.5283	4.50653	33.0479	0.0428	13	3
2	7	0.4636	19.4133	0.1305	23.7274	8.62813	43.1406	0.03595	11	4
2	7	0.431	18.5615	0.117981	2.32019	0	4.64037	0.14145	1	0
2	7	0.65385	18.3528	0.114552	18.3528	1.5294	22.941	0.0644	12	1
2	7	0.49815	18.0668	0.119241	22.0817	2.00743	24.0891	0.15305	11	1
2	7	0.48955	18.3842	0.1627	20.4269	4.08538	12.2562	0.14825	10	2
2	7	0.4751	18.9434	0.136077	21.0482	0	16.8386	0.12885	10	0
2	7	0.41065	19.4813	0.133569	12.1758	0	14.611	0.052	5	0
2	7	0.4289	18.6524	0.118209	11.6577	0	27.9785	0.13165	5	0
2	7	0.3748	21.3447	0.11166	5.33618	0	8.00427	0.0425	2	0
2	7	0.76785	16.9304	0.0807449	14.3257	2.60468	13.0234	0.1105	11	2
2	7	0.42445	18.8479	0.13971	7.06797	2.35599	28.2719	0.0803	3	1
2	7	0.8635	17.3712	0.114939	27.7939	0	22.0035	0.07585	24	0
2	7	0.25485	15.6955	0.0594467	27.4671	3.92388	15.6955	0.06975	7	1
2	7	0.46795	17.0958	0.149589	21.3698	2.13698	27.7807	0.05415	10	1
2	7	0.5097	15.6955	0.12782	31.391	3.92388	25.5052	0.0175	16	2
2	7	0.3761	18.6121	0.093858	15.9532	0	13.2943	0.1492	6	0
2	7	0.5405	12.951	0.0591119	18.5014	0	14.8011	0.06245	10	0
1	5	0.7457	21.4563	0.0881722	8.04613	14.7512	0	0.0243	6	11
1	5	0.30675	22.8199	0.118337	19.5599	6.51997	16.2999	0.01995	6	2
1	5	0.31765	22.0368	0.0862585	12.5925	6.29624	18.8887	0.0421	4	2
1	5	0.15965	25.0548	0.111807	18.7911	12.5274	25.0548	0.04515	3	2
1	5	0.3153	19.0295	0.0661275	12.6863	6.34317	25.3727	0.024	4	2
1	5	0.5731	17.449	0.0842785	24.4285	20.9388	19.1939	0.0133	14	12
1	5	0.2723	25.7069	0.103562	14.6897	11.0173	22.0345	0.0023	4	3
1	5	0.2282	21.9106	0.133216	21.9106	4.38212	21.9106	0.037	5	1
1	5	0.29765	23.5176	0.0975978	20.1579	10.079	23.5176	0.0239	6	3
1	5	0.2614	22.9533	0.0776588	22.9533	15.3022	34.43	0.0018	6	4
1	5	0.26005	19.2271	0.0851759	11.5362	7.69083	26.9179	0.033	3	2
1	5	0.4005	22.4719	0.0882647	17.4782	19.975	24.9688	0.01955	7	8
1	5	0.1115	26.9058	0.0793722	17.9372	8.96861	26.9058	0.00175	2	1
1	5	0.2461	20.3169	0.0605445	12.1902	12.1902	28.4437	0.00435	3	3
1	5	0.3982	17.5791	0.106479	22.6017	12.5565	25.113	0.00065	9	5
1	5	0.1956	25.5624	0.118354	10.2249	5.11247	20.4499	0.05195	2	1
1	5	0.4236	21.2465	0.121813	18.8857	21.2465	18.8857	0.0211	8	9
1	5	0.2353	25.4994	0.0945601	25.4994	16.9996	21.2495	0.02575	6	4
1	5	0.3436	23.2829	0.102154	17.4622	17.4622	20.3725	0.03595	6	6
1	5	0.4047	22.2387	0.0840128	27.1806	22.2387	19.7677	0.0015	11	9
1	5	0.3072	19.5313	0.0576172	9.76563	13.0208	22.7865	0.01935	3	4
1	5	0.25605	23.4329	0.0702988	11.7165	7.81097	11.7165	0.03105	3	2
1	5	1.3608	15.4321	0.0713918	16.9018	19.8413	13.9624	0.23635	23	27
1	5	0.3801	26.3089	0.139305	18.4162	13.1544	21.0471	0.0185	7	5
1	5	0.369	16.2602	0.133333	13.5501	8.13008	35.2304	0.003	5	3
1	5	0.42205	21.3245	0.15401	23.6939	11.8469	30.802	0.044	10	5
1	5	0.76155	19.6967	0.103342	26.2622	23.636	24.9491	0.01205	20	18
1	5	0.27035	22.1935	0.081191	11.0967	14.7956	29.5913	0.0307	3	4
1	5	0.37255	21.4736	0.110321	24.1578	13.421	21.4736	0.00705	9	5
1	5	0.93525	20.3154	0.101203	23.5231	16.0385	20.3154	0.04285	22	15
1	5	0.845	16.568	0.0849704	20.1183	20.1183	20.1183	0.0072	17	17
1	5	0.3083	22.7052	0.0822251	19.4616	6.48719	25.9488	0.05515	6	2
1	5	0.30855	19.4458	0.063685	12.9639	9.7229	19.4458	0.00575	4	3
1	5	0.2686	22.338	0.1465	22.338	3.72301	26.0611	0.06695	6	1
1	5	0.3094	19.3924	0.140595	16.1603	3.23206	19.3924	0.04085	5	1
1	5	0.3516	22.7531	0.110922	17.0648	11.3766	25.5973	0.00265	6	4
1	5	0.4176	16.7625	0.0878831	26.341	14.3678	28.7356	0.0022	11	6
1	5	0.40565	19.7214	0.0939233	22.1866	12.3259	24.6518	0.02565	9	5
1	5	0.40925	19.548	0.0712279	14.661	21.9914	19.548	0.07815	6	9
1	5	0.2728	21.9941	0.109604	14.6628	10.9971	18.3284	0.06515	4	3
1	5	0.10935	27.4348	0.0539552	18.2899	0	0	0.2196	2	0
1	5	0.4088	17.1233	0.0887965	19.5695	9.78474	24.4618	0.03995	8	4
1	5	0.41115	14.5932	0.0661559	24.322	12.161	19.4576	0.0435	10	5
1	5	0.2492	24.077	0.0776485	16.0514	8.02568	12.0385	0.00645	4	2
1	5	0.29375	20.4255	0.107574	23.8298	20.4255	23.8298	0.07595	7	6
1	5	0.2486	16.0901	0.036605	12.0676	4.02253	20.1126	0.06095	3	1
1	5	0.2285	26.2582	0.113786	8.75274	4.37637	30.6346	0.02625	2	1
1	5	0.245	24.4898	0.10898	16.3265	16.3265	24.4898	0.01985	4	4
1	5	0.15615	32.0205	0.165226	32.0205	0	12.8082	0.1246	5	0
1	5	0.2149	27.92	0.12564	23.2666	0	27.92	0.0322	5	0
1	5	0.1457	34.3171	0.123542	13.7268	6.86342	13.7268	0.04105	2	1
1	5	0.1985	30.2267	0.121662	10.0756	5.03778	20.1511	0.0617	2	1
1	5	0.60525	19.8265	0.109459	19.8265	21.4787	23.1309	0.04125	12	13
1	5	0.22765	30.749	0.110037	17.5708	8.78542	21.9635	0.0497	4	2
1	5	0.33245	21.0558	0.105429	15.0399	15.0399	9.02391	0.0332	5	5
1	5	0.45155	22.1459	0.0847082	13.2876	19.9313	24.3605	0.0096	6	9
1	5	0.34955	22.8866	0.119153	20.0257	22.8866	22.8866	0.03755	7	8
1	5	0.36925	18.9573	0.0427894	24.3737	13.541	29.7901	0.01045	9	5
1	5	0.41605	19.2285	0.0623723	14.4213	16.8249	19.2285	0.01415	6	7
1	5	0.3148	19.0597	0.0851334	9.52986	9.52986	28.5896	0.0293	3	3
1	5	0.4193	16.6945	0.0630813	14.3096	7.15478	19.0794	0.12975	6	3
1	5	0.30265	13.2166	0.0636048	13.2166	9.91244	16.5207	0.0231	4	3
1	5	0.25695	23.3508	0.0583771	7.78362	3.89181	19.459	0.01815	2	1
1	5	0.3415	20.4978	0.0572474	14.6413	8.78477	23.4261	0.0188	5	3
1	5	0.55755	16.1421	0.068514	14.3485	14.3485	14.3485	0.01025	8	8
1	5	0.5589	19.6815	0.0850778	14.3138	14.3138	21.4707	0.1004	8	8
1	5	0.30895	22.6574	0.0828613	19.4206	6.47354	25.8942	0.0022	6	2
1	5	0.2498	24.0192	0.0906725	28.0224	4.0032	28.0224	0.00975	7	1
1	5	0.3126	19.1939	0.0734165	19.1939	9.59693	19.1939	0.00445	6	3
1	5	0.3165	22.1169	0.0842022	12.6382	3.15956	28.436	0.0049	4	1
1	5	0.3721	16.1247	0.0794141	21.4996	5.3749	21.4996	0.0251	8	2
1	5	0.3584	16.7411	0.0404576	19.5313	8.37054	22.3214	0.0006	7	3
1	5	0.17425	17.2166	0.0183644	17.2166	0	17.2166	0.0469	3	0
1	5	0.3293	18.2205	0.0888248	12.147	12.147	18.2205	0.0926	4	4
1	5	0.3145	19.0779	0.11717	19.0779	12.7186	22.2576	0.0117	6	4
1	5	0.31935	21.9195	0.0836073	25.0509	12.5254	15.6568	0.0391	8	4
1	5	0.87825	14.8022	0.0623968	19.3567	18.218	19.3567	0.0067	17	16
1	5	0.2971	20.1952	0.0639515	6.73174	10.0976	20.1952	0.0056	2	3
1	5	0.0803	37.3599	0.13076	24.9066	0	0	0.2982	2	0
1	5	0.2128	23.4962	0.0897556	23.4962	4.69925	28.1955	0.0011	5	1
1	5	0.2784	21.5517	0.129849	21.5517	21.5517	35.9195	0.01635	6	6
1	5	0.37445	18.6941	0.0894645	16.0235	8.01175	21.3647	0.00255	6	3
1	5	0.2561	23.4283	0.0901991	11.7142	11.7142	19.5236	0.0426	3	3
1	5	0.3623	22.0811	0.112476	11.0406	13.8007	22.0811	0.012	4	5
1	5	0.3103	19.3361	0.112472	16.1134	16.1134	32.2269	0.0152	5	5
1	5	0.12625	31.6832	0.102574	23.7624	0	7.92079	0.0611	3	0
1	5	0.25635	23.4055	0.080749	27.3064	3.90092	19.5046	0.0084	7	1
1	5	0.2108	23.7192	0.0811195	18.9753	0	23.7192	0.03145	4	0
1	5	0.268	18.6567	0.0505597	22.3881	7.46269	22.3881	0.03085	6	2
1	5	0.25285	23.7295	0.145739	11.8647	3.95491	27.6844	0.01445	3	1
1	5	0.21715	23.0256	0.0893392	9.21022	13.8153	27.6307	0.079	2	3
1	5	0.26845	22.3505	0.0819519	18.6254	3.72509	29.8007	0.0164	5	1
1	5	0.25985	23.0902	0.0700404	23.0902	3.84837	26.9386	0.03795	6	1
1	5	0.23225	17.2228	0.112809	17.2228	8.61141	21.5285	0.02585	4	2
1	5	0.26155	22.9402	0.129803	11.4701	7.64672	15.2934	0.0393	3	2
1	5	0.26505	22.6372	0.106772	22.6372	15.0915	15.0915	0.06635	6	4
1	5	0.1869	16.0514	0.0543071	21.4018	0	32.1027	0.0156	4	0
1	5	0.3266	21.4329	0.11834	18.3711	12.2474	24.4948	0.0066	6	4
1	5	0.1003	29.9103	0.0348953	0	0	29.9103	0.036	0	0
1	5	0.25455	23.571	0.128658	15.714	0	19.6425	0.01465	4	0
1	5	0.3584	22.3214	0.111189	16.7411	13.9509	41.8527	0.0095	6	5
1	5	0.41725	14.3799	0.0439784	16.7765	11.9832	7.18993	0.097	7	5
1	5	0.2078	24.0616	0.107555	19.2493	9.62464	14.437	0.00825	4	2
1	5	0.21075	23.7248	0.138553	18.9798	4.74496	18.9798	0.07625	4	1
1	5	0.27445	21.8619	0.0502824	25.5056	7.2873	25.5056	0.0091	7	2
1	5	0.2353	21.2495	0.0631109	12.7497	0	21.2495	0.0122	3	0
1	5	0.2128	23.4962	0.087641	18.797	4.69925	9.3985	0.005	4	1
1	5	0.3597	22.2408	0.103837	19.4607	8.34028	22.2408	0.001	7	3
1	5	0.37655	18.5898	0.12256	10.6228	21.2455	7.96707	0.02025	4	8
1	5	0.1456	27.4725	0.102335	6.86813	0	13.7363	0.0989	1	0
1	5	0.2618	19.0985	0.0846066	15.2788	3.81971	15.2788	0.09975	4	1
1	5	0.27985	21.4401	0.0770055	14.2934	10.72	25.0134	0.00085	4	3
1	5	0.8956	22.3314	0.130918	25.6811	16.7485	18.9817	0.00025	23	15
1	5	0.14165	35.2983	0.1006	28.2386	0	7.05965	0.1292	4	0
1	5	0.17825	28.0505	0.0920056	16.8303	11.2202	28.0505	0.04795	3	2
1	5	0.13835	36.1402	0.147091	28.9122	0	7.22804	0.116	4	0
1	5	0.25795	27.137	0.145183	19.3836	3.87672	31.0138	0.00105	5	1
1	5	0.3045	22.9885	0.124302	13.1363	13.1363	19.7044	0.04565	4	4
1	5	0.28225	28.3437	0.0942427	28.3437	17.7148	28.3437	0.05505	8	5
1	5	0.33975	17.66	0.0672553	23.5467	11.7734	17.66	0.0827	8	4
1	5	0.3984	22.5904	0.134664	22.5904	12.5502	17.5703	0.01595	9	5
1	5	0.3413	23.4398	0.124524	20.5098	14.6499	17.5798	0.02585	7	5
1	5	0.19115	26.1575	0.0601622	0	5.23149	15.6945	0.0072	0	1
1	5	0.3037	23.0491	0.0633849	13.1709	13.1709	23.0491	0.02375	4	4
1	5	0.40225	19.8881	0.0889994	14.9161	14.9161	17.4021	0.00325	6	6
1	5	0.35025	22.8408	0.0876517	14.2755	5.71021	14.2755	0.00475	5	2
1	5	0.2548	23.5479	0.122057	7.84929	7.84929	27.4725	0.08975	2	2
1	5	0.6052	18.1758	0.0941011	16.5235	16.5235	28.0899	0	10	10
1	5	0.67585	19.235	0.0574092	20.7147	13.3166	23.6739	0.00085	14	9
1	5	0.30445	26.2769	0.115618	26.2769	9.85383	26.2769	0.00715	8	3
1	5	0.36715	13.6184	0.05175	21.7895	10.8947	16.3421	0.08515	8	4
1	5	0.40195	22.3908	0.0787411	19.903	17.4151	17.4151	0.07385	8	7
1	5	0.3963	22.7101	0.103331	20.1867	12.6167	17.6634	0.06535	8	5
1	5	0.1989	25.1383	0.0937657	10.0553	10.0553	30.1659	0.02925	2	2
1	5	0.14585	20.5691	0.0435379	27.4254	27.4254	34.2818	0.01225	4	4
1	5	0.45455	17.5998	0.0887691	26.3997	17.5998	21.9998	0.0126	12	8
1	5	0.3534	22.6372	0.105122	14.1483	8.48896	19.8076	0.0767	5	3
1	5	0.2593	23.1392	0.0483995	19.2827	3.85654	15.4261	0.07705	5	1
1	5	0.2045	24.4499	0.122249	19.5599	4.88998	14.6699	0.03795	4	1
1	5	0.724	17.9558	0.0963398	24.8619	19.337	12.4309	0.02385	18	14
1	5	0.30375	19.7531	0.108148	19.7531	6.58436	19.7531	0.0393	6	2
1	5	0.25045	23.9569	0.0898383	19.9641	7.98563	19.9641	0.0351	5	2
1	5	0.24795	20.1654	0.0608994	24.1984	12.0992	20.1654	0.00635	6	3
1	5	0.3003	23.31	0.0970696	19.98	3.33	19.98	0.01075	6	1
1	5	0.75565	15.8804	0.0490968	15.8804	17.2037	18.5271	0.062	12	13
1	5	0.23235	21.5193	0.070368	17.2154	8.6077	25.8231	0.0022	4	2
1	5	0.3742	24.0513	0.0986104	32.0684	10.6895	18.7066	0.06215	12	4
1	5	0.15235	39.383	0.0836889	19.6915	0	19.6915	0.0296	3	0
1	5	0.21175	23.6128	0.0373081	18.8902	9.4451	33.0579	0.02415	4	2
1	5	0.19745	25.3229	0.152697	10.1291	15.1937	20.2583	0.015	2	3
1	5	0.21985	27.2913	0.0993859	18.1942	4.54856	22.7428	0.02955	4	1
1	5	0.5042	19.8334	0.113645	11.9	13.8834	17.8501	0.0079	6	7
1	5	0.5613	17.8158	0.0890789	10.6895	14.2526	19.5974	0.00335	6	8
1	5	1.20425	18.2686	0.0927548	22.4206	15.7775	17.4382	0.0548	27	19
1	5	0.25565	23.4696	0.0420497	23.4696	0	19.558	0.0346	6	0
1	5	0.8809	18.1632	0.0758883	18.1632	20.4336	15.8928	0.04895	16	18
1	5	0.46595	21.4615	0.100655	17.1692	19.3154	25.7538	0.0516	8	9
1	5	0.35325	22.6469	0.0973815	14.1543	8.49257	22.6469	0.04255	5	3
1	5	0.27385	21.9098	0.103159	18.2582	10.9549	21.9098	0.04375	5	3
1	5	0.5011	15.9649	0.0909	21.9517	15.9649	23.9473	0.01175	11	8
1	5	0.6982	18.6193	0.0747637	22.9161	14.3225	21.4838	0.04145	16	10
1	5	0.51035	21.5538	0.105418	21.5538	15.6755	17.635	0.01515	11	8
1	5	0.4183	19.125	0.126106	21.5157	11.9531	21.5157	0.0464	9	5
1	5	0.1627	24.5851	0.0805163	30.7314	6.14628	18.4388	0.0437	5	1
1	5	0.26255	22.8528	0.109503	11.4264	11.4264	15.2352	0.03825	3	3
1	5	0.2666	22.5056	0.129595	30.0075	3.75094	18.7547	0.0558	8	1
1	5	0.1649	24.2571	0.161007	12.1286	12.1286	18.1928	0.06485	2	2
1	5	0.4155	21.6606	0.125872	16.8472	14.4404	21.6606	0.0065	7	6
1	5	0.297	23.569	0.0936027	13.468	6.73401	20.202	0.06465	4	2
1	5	0.35485	19.7266	0.105256	25.3628	16.9086	25.3628	0.0281	9	6
1	5	0.51085	21.5327	0.122639	25.4478	23.4903	21.5327	0.01975	13	12
1	5	0.3888	23.1481	0.121142	20.5761	18.0041	25.7202	0.0525	8	7
1	5	0.34645	23.0914	0.138837	23.0914	11.5457	25.9778	0.01165	8	4
1	5	0.4096	19.5313	0.101196	12.207	17.0898	17.0898	0.10225	5	7
1	5	0.46665	21.4293	0.0837887	21.4293	21.4293	21.4293	0.00335	10	10
1	5	0.2844	24.6132	0.108826	14.0647	3.51617	14.0647	0.08235	4	1
1	5	0.3511	17.0891	0.0576759	11.3928	5.69638	14.241	0.0364	4	2
1	5	0.2224	22.482	0.0919514	8.99281	4.4964	13.4892	0.02825	2	1
1	5	0.1591	37.7121	0.12445	12.5707	6.28536	6.28536	0.1128	2	1
1	5	0.1579	31.6656	0.0826472	25.3325	0	6.33312	0.0947	4	0
1	5	0.26515	22.6287	0.0590232	18.8573	7.5429	18.8573	0.0934	5	2
1	5	0.1856	26.9397	0.0743534	10.7759	0	10.7759	0.1042	2	0
1	5	0.49915	18.0307	0.129921	14.0238	8.01362	16.0272	0.09635	7	4
1	5	0.2529	15.8165	0.024911	15.8165	15.8165	15.8165	0.09275	4	4
1	5	0.34295	23.327	0.132818	17.4953	5.83175	20.4111	0.0359	6	2
1	5	0.49445	16.1796	0.0734149	20.2245	12.1347	18.202	0.01335	10	6
1	5	0.30765	22.7531	0.10889	16.2522	6.50089	19.5027	0.0286	5	2
1	5	0.4511	22.168	0.133673	24.3848	15.5176	15.5176	0.09945	11	7
1	5	0.1525	19.6721	0.0629508	19.6721	13.1148	6.55738	0.08185	3	2
1	5	0.25755	23.2964	0.0854203	15.531	7.76548	15.531	0.0007	4	2
1	5	0.31675	15.7853	0.0418311	9.47119	9.47119	9.47119	0.0014	3	3
1	5	0.4088	22.0157	0.146526	17.1233	14.6771	29.3542	0.02365	7	6
1	5	0.32575	24.5587	0.121412	21.4889	12.2794	21.4889	0.0425	7	4
1	5	0.2797	21.4516	0.127637	14.301	14.301	25.0268	0.0392	4	4
1	5	0.25495	19.6117	0.0929594	15.6894	11.767	27.4564	0.0044	4	3
1	5	0.3189	21.9505	0.149106	18.8147	6.27156	21.9505	0.0129	6	2
1	5	0.31035	22.5552	0.0807153	19.333	6.44434	19.333	0.0846	6	2
1	5	0.36415	24.7151	0.13964	19.2228	21.969	27.4612	0.02095	7	8
1	5	0.2296	26.1324	0.0993031	8.7108	8.7108	21.777	0.0139	2	2
1	5	0.7131	19.6326	0.118497	19.6326	19.6326	22.4372	0.05215	14	14
1	5	0.54915	20.031	0.0797596	21.852	18.21	14.568	0.0726	12	10
1	5	0.355	22.5352	0.151549	11.2676	14.0845	22.5352	0.0197	4	5
1	5	0.31835	21.9884	0.10523	9.42359	9.42359	18.8472	0.0161	3	3
1	5	0.2537	23.65	0.0985416	15.7667	7.88333	15.7667	0.0911	4	2
1	5	0.2535	19.7239	0.107495	19.7239	7.88955	23.6686	0.0219	5	2
1	5	0.2475	24.2424	0.136566	16.1616	8.08081	16.1616	0.0559	4	2
1	5	0.19795	20.2071	0.055317	20.2071	5.05178	5.05178	0.1397	4	1
1	5	0.8734	16.0293	0.0768834	17.1743	9.15961	17.1743	0.029	15	8
1	5	0.3073	19.5249	0.0519037	16.2707	6.5083	26.0332	0.0119	5	2
1	5	0.4007	22.4607	0.0999501	14.9738	4.99127	17.4694	0.0531	6	2
1	5	0.1517	19.7759	0.0405405	13.1839	6.59196	19.7759	0.0713	2	1
1	5	0.2598	23.0947	0.0902617	23.0947	26.9438	26.9438	0.0417	6	7
1	5	0.2974	23.5373	0.114829	20.1748	10.0874	26.8998	0.0037	6	3
1	5	0.20875	23.9521	0.12479	23.9521	9.58084	19.1617	0.03505	5	2
1	5	0.30105	23.252	0.097326	19.9302	19.9302	9.96512	0.03625	6	6
1	5	0.3016	16.5782	0.0530504	19.8939	13.2626	19.8939	0.04205	6	4
1	5	0.4079	22.0642	0.123192	22.0642	14.7095	24.5158	0.0036	9	6
1	5	0.50945	21.5919	0.0831289	19.629	15.7032	21.5919	0.01775	10	8
1	5	0.28655	24.4285	0.105043	27.9183	17.449	20.9388	0.0766	8	5
1	5	0.14615	41.0537	0.137188	20.5269	0	13.6846	0.04515	3	0
1	5	0.31685	22.0925	0.118195	22.0925	12.6243	15.7803	0.1055	7	4
1	5	0.21895	27.4035	0.104818	22.8363	0	22.8363	0.00175	5	0
1	5	0.49875	22.0551	0.108371	20.0501	20.0501	24.0602	0.0198	10	10
1	5	0.49825	18.0632	0.070848	18.0632	8.0281	24.0843	0.0345	9	4
1	5	0.2982	23.4742	0.0806506	23.4742	13.4138	16.7673	0.0395	7	4
1	5	0.36275	19.297	0.0978635	30.3239	11.0269	24.8105	0.01235	11	4
1	5	0.26225	15.2526	0.0387035	15.2526	11.4395	26.6921	0.01465	4	3
1	5	0.08355	35.9066	0.0807899	11.9689	0	0	0.12165	1	0
1	5	0.3001	16.6611	0.0738087	13.3289	13.3289	26.6578	0.0309	4	4
1	5	0.5469	16.4564	0.0537575	20.1134	18.2849	23.7703	0.0084	11	10
1	5	0.34995	22.8604	0.0518646	20.0029	11.4302	22.8604	0.02335	7	4
1	5	0.16255	30.7598	0.129499	24.6078	12.3039	12.3039	0.04695	4	2
1	5	0.47115	21.2247	0.0889313	21.2247	8.48987	21.2247	0.0084	10	4
1	5	0.23105	17.3123	0.0311621	21.6403	8.65614	21.6403	0.02305	5	2
1	5	0.2496	20.0321	0.0793269	8.01282	12.0192	16.0256	0.1088	2	3
1	5	0.29025	24.1171	0.142291	20.6718	17.2265	27.5624	0.05925	6	5
1	5	0.7408	16.1987	0.0796436	20.2484	18.8985	18.8985	0.0332	15	14
1	5	0.31215	22.4251	0.108281	16.0179	6.40718	19.2215	0.0111	5	2
1	5	0.2532	23.6967	0.112164	23.6967	19.7472	7.89889	0.0227	6	5
1	5	0.2084	23.9923	0.0926104	14.3954	4.79846	14.3954	0.021	3	1
1	5	0.25315	23.7014	0.0975706	23.7014	11.8507	15.8009	0.1083	6	3
1	5	0.36265	19.3024	0.102716	16.5449	16.5449	22.0598	0.05075	6	6
1	5	0.2301	21.7297	0.0601912	17.3837	8.69187	21.7297	0.0599	4	2
1	5	0.36	22.2222	0.0875	22.2222	13.8889	25	0.054	8	5
1	5	0.39495	15.1918	0.0674769	20.2557	12.6598	17.7238	0.0301	8	5
1	5	0.364	19.2308	0.0541209	24.7253	13.7363	13.7363	0.07125	9	5
1	5	0.30965	25.8356	0.0899403	19.3767	3.22945	22.6062	0.00445	6	1
1	5	0.17825	33.6606	0.10575	28.0505	11.2202	16.8303	0.0333	5	2
1	5	0.4703	21.263	0.128429	21.263	14.8841	23.3893	0.00085	10	7
1	5	0.2628	19.0259	0.0363394	34.2466	11.4155	19.0259	0.0592	9	3
1	5	0.29965	20.0234	0.0707492	10.0117	10.0117	20.0234	0.03715	3	3
1	5	0.26525	22.6202	0.0825636	18.8501	7.54006	26.3902	0.00835	5	2
1	5	0.32245	18.6075	0.0676074	15.5063	21.7088	9.30377	0.06325	5	7
1	5	0.31045	16.1057	0.0450958	16.1057	16.1057	16.1057	0.0175	5	5
1	5	0.25615	19.5198	0.0860824	27.3277	19.5198	27.3277	0.0146	7	5
1	5	0.2995	23.3723	0.0819699	20.0334	16.6945	26.7112	0.0328	6	5
1	5	0.14185	28.1988	0.122665	21.1491	7.0497	14.0994	0.06145	3	1
1	5	0.1783	22.4341	0.0515984	33.6511	0	16.8256	0.11	6	0
1	5	0.14485	34.5185	0.0966517	62.1332	0	13.8074	0.0475	9	0
1	5	0.23795	29.4179	0.073755	29.4179	4.20256	16.8103	0.04175	7	1
1	5	0.4151	19.2725	0.0579378	21.6815	14.4543	19.2725	0.03275	9	6
1	5	0.61235	17.9636	0.074059	17.9636	21.2297	16.3305	0.029	11	13
1	5	0.1427	28.0308	0.047302	14.0154	0	14.0154	0.0003	2	0
1	5	1.0764	16.7224	0.0810572	19.5095	13.9353	26.9417	0.0232	21	15
1	5	0.213	23.4742	0.0629108	9.38967	18.7793	28.169	0.00935	2	4
1	5	0.41405	21.7365	0.103852	14.491	16.9062	19.3213	0.0585	6	7
1	5	0.35615	22.4624	0.0808648	22.4624	30.8859	19.6546	0.08745	8	11
1	5	0.20145	24.8201	0.0774386	29.7841	9.92802	9.92802	0.0277	6	2
1	5	0.3561	22.4656	0.102078	33.6984	22.4656	33.6984	0.01015	12	8
1	5	0.35345	11.317	0.0273023	25.4633	14.1463	11.317	0.02645	9	5
1	5	0.16985	17.6626	0.067118	5.88755	11.7751	23.5502	0.0106	1	2
1	5	0.1626	24.6002	0.0784133	18.4502	6.15006	30.7503	0.0223	3	1
1	5	0.3138	19.1205	0.101338	15.9337	19.1205	19.1205	0.0347	5	6
1	5	0.2602	23.0592	0.0980015	15.3728	15.3728	23.0592	0.00295	4	4
1	5	0.40795	17.159	0.0850594	17.159	14.7077	24.5128	0.0503	7	6
1	5	0.51255	15.6082	0.0749195	19.5103	15.6082	27.3144	0.04525	10	8
1	5	0.29955	23.3684	0.0953096	30.0451	23.3684	26.7067	0.0426	9	7
1	5	0.26725	18.7091	0.0950421	18.7091	7.48363	11.2254	0.01515	5	2
1	5	0.26765	18.6811	0.0906034	22.4173	11.2087	14.9449	0.00645	6	3
1	5	0.3587	13.9392	0.0522721	25.0906	13.9392	22.3028	0.04105	9	5
1	5	0.3572	19.5969	0.0900056	19.5969	8.39866	25.196	0.0359	7	3
1	5	0.2659	22.5649	0.12862	30.0865	7.52162	22.5649	0.0087	8	2
1	5	0.31975	18.7647	0.115403	21.8921	9.38233	18.7647	0.0301	7	3
1	5	0.3626	22.0629	0.10797	24.8207	8.27358	27.5786	0.042	9	3
1	5	0.27565	18.1389	0.0457101	21.7667	21.7667	29.0223	0.0295	6	6
1	5	0.1201	24.9792	0.0736886	24.9792	0	8.32639	0.011	3	0
1	5	0.2805	21.3904	0.120143	32.0856	7.13012	28.5205	0.00935	9	2
1	5	0.4245	16.49	0.0914016	25.9128	18.8457	21.2014	0.0057	11	8
1	5	0.4319	18.5228	0.0840472	13.8921	13.8921	18.5228	0.02385	6	6
1	5	0.26635	22.5268	0.0936737	18.7723	18.7723	26.2812	0.0256	5	5
1	5	0.36	22.2222	0.122778	16.6667	16.6667	22.2222	0.0164	6	6
1	5	0.3078	19.4932	0.0451592	22.742	9.74659	29.2398	0.0096	7	3
1	5	0.414	16.9082	0.081401	9.66184	9.66184	33.8164	0.0029	4	4
1	5	0.4594	17.414	0.0698737	19.5908	15.2373	19.5908	0.00525	9	7
1	5	0.215	23.2558	0.109535	4.65116	9.30233	23.2558	0.01605	1	2
1	5	0.31855	18.8353	0.0598022	18.8353	12.5569	25.1138	0.02025	6	4
1	5	0.32275	18.5902	0.0593338	21.6886	21.6886	24.787	0.02975	7	7
1	5	0.2359	16.9563	0.0862654	21.1954	21.1954	21.1954	0.04485	5	5
1	5	0.26875	22.3256	0.0876279	18.6047	18.6047	18.6047	0.03825	5	5
1	5	0.21485	23.2721	0.0651617	13.9632	13.9632	37.2353	0.04175	3	3
1	5	0.2274	21.9877	0.0817942	17.5901	13.1926	26.3852	0.0091	4	3
1	5	0.36635	19.1074	0.0967654	21.837	2.72963	19.1074	0.00875	8	1
1	5	0.32985	21.2218	0.0901925	24.2534	21.2218	24.2534	0.0169	8	7
1	5	0.2171	23.0309	0.0907416	13.8185	13.8185	18.4247	0.00185	3	3
1	5	0.2098	23.8322	0.108198	9.53289	4.76644	38.1316	0.01925	2	1
1	5	0.2535	19.7239	0.0715976	11.8343	11.8343	19.7239	0.04245	3	3
1	5	0.46325	21.5866	0.113114	21.5866	23.7453	21.5866	0.0208	10	11
1	5	0.3139	22.3001	0.116598	22.3001	9.55718	22.3001	0.0054	7	3
1	5	0.2104	23.7643	0.161597	19.0114	4.75285	23.7643	0.00565	4	1
1	5	0.36	22.2222	0.134306	22.2222	11.1111	19.4444	0.0045	8	4
1	5	0.7638	17.0202	0.0805839	18.3294	18.3294	22.2571	0.0015	14	14
1	5	0.52125	23.0216	0.111463	23.0216	17.2662	0	NaN	12	9
1	5	0.2713	22.1157	0.0851456	7.37191	0	0	0.0778	2	0
1	5	0.33765	23.6932	0.0894417	8.88494	0	8.88494	0.15285	3	0
1	5	0.2743	21.8739	0.118666	10.9369	0	10.9369	0.01685	3	0
1	5	0.3104	22.5515	0.150451	19.3299	0	6.4433	0.24615	6	0
1	5	0.36755	21.7657	0.174534	16.3243	2.72072	19.045	0.0204	6	1
1	5	0.3689	18.9753	0.0958254	13.5538	0	16.2646	0.1104	5	0
1	5	0.46525	21.4938	0.16475	15.0457	2.14938	30.0913	0.00745	7	1
1	5	0.3226	18.5989	0.0747055	15.4991	0	9.29944	0.10935	5	0
1	5	0.68255	17.5811	0.111274	14.6509	2.93019	13.1858	0.10195	10	2
1	5	0.2838	21.1416	0.126674	0	0	7.04722	0.11625	0	0
1	5	0.37245	16.1095	0.0710162	8.05477	2.68492	8.05477	0.08315	3	1
1	5	0.3339	20.9644	0.101078	11.9796	0	29.9491	0.04225	4	0
1	5	0.28765	20.8587	0.0697028	27.8116	0	13.9058	0.1188	8	0
1	5	0.27025	22.2017	0.0501388	11.1008	0	14.8011	0.1246	3	0
1	5	0.27735	21.6333	0.116279	14.4222	7.21111	10.8167	0.0256	4	2
1	5	0.32235	21.7155	0.109508	9.30665	0	0	0.37085	3	0
1	5	0.48635	20.5613	0.117508	10.2807	0	14.3929	0.1073	5	0
1	5	0.33845	20.6825	0.164869	11.8186	0	8.86394	0.20825	4	0
1	5	0.55355	18.0652	0.119682	7.22609	1.80652	10.8391	0.0253	4	1
1	5	0.3977	20.1157	0.146341	12.5723	0	7.54337	0.0276	5	0
1	5	0.333	21.021	0.175826	6.00601	0	12.012	0.1107	2	0
1	5	0.4157	16.8391	0.0924946	12.0279	0	16.8391	0.04875	5	0
1	5	0.224	22.3214	0.127232	4.46429	0	4.46429	0.1235	1	0
1	5	0.1178	25.4669	0.0191002	0	0	0	0.2448	0	0
1	5	0.30115	19.9236	0.161713	6.64121	0	16.603	0.06295	2	0
1	5	0.226	22.1239	0.0803097	22.1239	0	4.42478	0.05855	5	0
1	5	0.17135	23.344	0.0560257	5.83601	0	5.83601	0.15755	1	0
1	5	0.2165	23.0947	0.145035	9.23788	0	18.4758	0.0952	2	0
1	5	0.168	23.8095	0.0860119	0	0	0	0.39335	0	0
1	5	0.5368	20.4918	0.141207	13.0402	1.86289	11.1773	0.00825	7	1
1	5	0.3819	18.3294	0.0912543	2.61849	0	10.4739	0.0635	1	0
1	5	0.2642	22.7101	0.105791	0	0	7.57002	0.1034	0	0
1	5	0.432	18.5185	0.0920139	13.8889	2.31481	20.8333	0.0196	6	1
1	5	0.4785	18.8088	0.113271	14.629	6.26959	25.0784	0.0382	7	3
1	5	0.4337	20.7517	0.16682	23.0574	9.22297	18.4459	0.02	10	4
1	5	0.3404	17.6263	0.141745	11.7509	0	5.87544	0.1161	4	0
1	5	0.7371	17.6367	0.120472	6.78334	0	10.8533	0.032	5	0
1	5	0.3867	20.6879	0.111327	5.17197	2.58598	10.3439	0.10225	2	1
1	5	1.07875	19.467	0.137845	15.759	1.854	13.905	0.04625	17	2
1	5	0.47475	21.0637	0.113533	16.851	10.5319	14.7446	0.01775	8	5
1	5	0.8062	19.8462	0.133218	16.125	2.48077	13.6443	0.0679	13	2
1	5	0.64365	15.5364	0.0931407	20.1973	6.21456	21.751	0.0511	13	4
1	5	0.28335	21.1752	0.086289	0	3.5292	17.646	0.0445	0	1
1	5	0.5046	15.8541	0.0791716	17.8359	3.96354	19.8177	0.08565	9	2
1	5	0.28825	20.8153	0.134952	10.4076	0	17.3461	0.1015	3	0
1	5	0.38155	20.9671	0.156074	10.4836	2.62089	15.7253	0.13635	4	1
1	5	0.2219	22.5327	0.0561064	4.50653	0	4.50653	0.12745	1	0
1	5	0.4876	18.4578	0.0784454	18.4578	2.05086	18.4578	0.0476	9	1
1	5	0.32065	21.8307	0.110557	6.23733	0	6.23733	0.0449	2	0
1	5	0.54625	20.1373	0.0835698	14.6453	3.66133	21.968	0.01705	8	2
1	5	0.5776	20.7756	0.0805055	19.0443	6.92521	19.0443	0.00205	11	4
1	5	0.2977	23.5136	0.206752	10.0773	0	13.4363	0.1033	3	0
1	5	0.6607	18.1626	0.0951264	13.6219	1.51355	15.1355	0.16435	9	1
1	5	0.5038	19.8491	0.0990472	13.8944	0	15.8793	0.11365	7	0
1	5	0.28015	21.4171	0.165626	10.7085	0	7.13903	0.19355	3	0
1	5	0.68065	19.0994	0.0824212	8.8151	0	16.161	0.13165	6	0
1	5	0.40415	19.7946	0.0893233	9.89732	2.47433	19.7946	0.07185	4	1
1	5	0.75055	18.653	0.0890014	22.6501	3.99707	19.9853	0.104	17	3
1	5	0.6435	18.648	0.127117	9.32401	0	20.202	0.01875	6	0
1	5	0.3841	20.8279	0.106483	15.6209	0	13.0174	0.2279	6	0
1	5	0.72875	19.211	0.129743	17.8388	5.48885	13.7221	0.0504	13	4
1	5	0.2739	21.9058	0.067908	10.9529	0	3.65097	0.17005	3	0
1	5	0.94505	19.0466	0.135972	17.9885	7.40702	19.0466	0.02095	17	7
1	5	0.21785	22.9516	0.195777	9.18063	0	9.18063	0.12115	2	0
1	5	1.239	19.3705	0.12724	12.9136	4.03551	21.7918	0.0581	16	5
1	5	0.44145	20.3874	0.154038	20.3874	2.26526	11.3263	0.2232	9	1
1	5	0.44305	15.7996	0.0589098	9.02833	0	22.5708	0.01275	4	0
1	5	0.6066	19.7824	0.117046	16.4853	0	13.1883	0.04515	10	0
1	5	0.448	20.0893	0.111719	8.92857	2.23214	6.69643	0.03535	4	1
1	5	0.27775	21.6022	0.134833	7.20072	0	7.20072	0.1161	2	0
1	5	0.67025	19.3957	0.0698247	7.4599	0	13.4278	0.07385	5	0
1	5	0.66545	16.5302	0.071756	16.5302	3.00549	15.0274	0.1339	11	2
1	5	0.28335	17.646	0.0675843	10.5876	0	10.5876	0.10695	3	0
1	5	2.09435	18.6215	0.107527	13.8468	7.16213	18.6215	0.0068	29	15
1	5	0.50235	19.9064	0.129392	17.9158	5.97193	15.9252	0.0436	9	3
1	5	0.37725	21.2061	0.154805	5.30152	0	5.30152	0.1629	2	0
1	5	0.43715	20.5879	0.119867	9.15018	2.28754	9.15018	0.1048	4	1
1	5	0.49665	18.1214	0.135206	10.0675	0	8.05396	0.05955	5	0
1	5	1.9092	17.8085	0.0969516	9.42803	8.38047	19.3798	0.1334	18	16
1	5	0.2748	21.8341	0.0986172	14.556	0	7.27802	0.1231	4	0
1	5	0.40645	17.2223	0.104441	17.2223	2.46033	12.3016	0.0841	7	1
1	5	0.44235	20.3459	0.115067	9.04261	4.52131	11.3033	0.02715	4	2
1	5	0.3321	21.078	0.15146	24.0891	0	6.02228	0.1232	8	0
1	5	0.3979	20.1056	0.135084	5.02639	0	12.566	0.00175	2	0
1	5	1.2544	19.1327	0.126196	9.56633	8.76913	18.3355	0.20345	12	11
1	5	0.59165	16.9019	0.0837488	16.9019	3.38038	21.9724	0.0442	10	2
1	5	0.5536	18.0636	0.0792991	21.6763	3.61272	25.289	0.0064	12	2
1	5	0.43695	18.3087	0.0879963	25.1745	4.57718	20.5973	0.16325	11	2
1	5	0.38625	20.712	0.0921683	10.356	2.589	12.945	0.16285	4	1
1	5	0.38695	20.6745	0.119912	15.5059	0	20.6745	0.13605	6	0
1	5	0.3956	20.2224	0.107179	15.1668	5.05561	20.2224	0.03805	6	2
1	5	0.3888	20.5761	0.122042	12.8601	2.57202	15.4321	0.0242	5	1
1	5	0.83035	20.4733	0.131872	16.8604	7.22587	20.4733	0.07415	14	6
1	5	0.43025	20.9181	0.118536	20.9181	11.6212	20.9181	0.06515	9	5
1	5	0.3266	21.4329	0.125842	12.2474	0	12.2474	0.0242	4	0
1	5	0.4025	19.8758	0.10882	14.9068	2.48447	24.8447	0.059	6	1
1	5	0.4666	19.2885	0.10105	21.4316	4.28633	10.7158	0.0144	10	2
1	5	1.34005	18.656	0.116861	11.1936	8.95489	19.4023	0.011	15	12
1	5	0.3802	21.0416	0.156365	10.5208	2.63019	21.0416	0.052	4	1
1	5	0.38075	18.3848	0.116743	15.7584	0	15.7584	0.02165	6	0
1	5	0.38415	20.8252	0.0883769	7.80945	5.2063	10.4126	0.03385	3	2
1	5	0.4303	18.5917	0.102138	18.5917	2.32396	16.2677	0.1213	8	1
1	5	0.55185	18.1209	0.0891547	10.8725	10.8725	25.3692	0.05415	6	6
1	5	0.46265	19.4532	0.129796	6.48438	4.32292	17.2917	0.0946	3	2
1	5	0.36795	16.3066	0.117815	2.71776	0	5.43552	0.14755	1	0
1	5	1.06665	19.6878	0.111424	18.7503	4.68757	12.1877	0.06475	20	5
1	5	0.54845	20.0565	0.11177	7.29328	5.46996	7.29328	0.0449	4	3
1	5	0.3204	21.8477	0.16573	21.8477	0	12.4844	0.0886	7	0
1	5	2.4002	18.7484	0.112949	9.1659	7.08274	15.832	0.00575	22	17
1	5	1.25735	19.0878	0.101324	7.95323	6.36259	14.3158	0.29605	10	8
1	5	0.47725	20.9534	0.129701	18.858	0	10.4767	0.08895	9	0
1	5	0.494	18.2186	0.0815789	6.07287	0	12.1457	0.222	3	0
1	5	0.3784	18.4989	0.120111	13.2135	0	18.4989	0.1082	5	0
1	5	0.89235	19.0508	0.114417	21.2921	4.48255	20.1715	0.0467	19	4
1	5	0.14585	20.5691	0.00342818	6.85636	0	6.85636	0.123	1	0
1	5	1.22325	18.8024	0.160801	8.17494	2.45248	15.5324	0.004	10	3
1	5	0.0879	45.5063	0.0989761	22.7531	11.3766	11.3766	0.07255	2	1
1	5	0.2323	17.2191	0.0439087	8.60956	25.8287	12.9143	0.01265	2	6
1	5	0.1013	29.615	0.0197433	0	19.7433	39.4867	0.0328	0	2
1	5	1.1037	19.933	0.156927	8.15439	2.71813	19.933	0.00925	9	3
1	5	0.5576	17.934	0.0642037	19.7274	5.3802	19.7274	0.03085	11	3
1	5	0.4293	20.9644	0.191358	13.9762	0	25.6231	0.02245	6	0
1	5	1.09445	19.1877	0.127416	16.4466	5.48221	25.5836	0.09075	18	6
1	5	0.44695	20.1365	0.151135	22.3739	6.71216	15.6617	0.11285	10	3
1	5	0.43355	18.4523	0.0757698	13.8392	2.30654	20.7589	0.0136	6	1
1	5	0.4483	17.8452	0.122574	15.6145	2.23065	15.6145	0.0231	7	1
1	5	1.23855	18.5701	0.100682	16.1479	6.45917	29.0662	0.0666	20	8
1	5	0.5819	18.9036	0.126224	12.0296	5.15553	17.1851	0.11205	7	3
1	5	1.1334	19.4106	0.121846	17.646	8.82301	22.0575	0.00055	20	10
1	5	0.27885	21.5169	0.136453	21.5169	0	21.5169	0.0899	6	0
1	5	0.63975	21.8835	0.173036	20.3204	1.56311	23.4467	0.0498	13	1
1	5	0.67445	20.7577	0.109497	14.8269	8.89614	20.7577	0.03035	10	6
1	5	0.2711	22.1321	0.135374	14.7547	0	18.4434	0.08825	4	0
1	5	0.4873	20.5212	0.147445	18.4691	2.05212	20.5212	0.029	9	1
1	5	0.3177	18.8857	0.114416	12.5905	0	22.0334	0.13185	4	0
1	5	0.3908	20.4708	0.110926	15.3531	0	23.0297	0.0788	6	0
1	5	0.3866	20.6932	0.205122	18.1066	2.58665	25.8665	0.0612	7	1
1	5	0.79335	20.1676	0.147665	20.1676	2.52096	23.9491	0.0245	16	2
1	5	0.5957	20.1444	0.132449	18.4657	10.0722	28.5379	0.04695	11	6
1	5	0.38045	21.0277	0.128138	26.2847	0	10.5139	0.159	10	0
1	5	0.56455	19.4845	0.128155	14.1706	0	21.2559	0.0029	8	0
1	5	0.3348	20.908	0.117682	32.8554	2.98686	14.9343	0.10815	11	1
1	5	0.3371	17.7989	0.158113	0	2.96648	23.7318	0.03615	0	1
1	5	0.3262	21.4592	0.0698958	12.2624	0	27.5904	0.0326	4	0
1	5	0.5371	20.4804	0.139266	5.58555	5.58555	26.0659	0.01665	3	3
1	5	0.5887	18.6852	0.116188	15.2879	3.39732	23.7812	0.10835	9	2
1	5	0.50005	19.998	0.109289	15.9984	0	19.998	0.06285	8	0
1	5	0.28005	21.4247	0.116586	10.7124	3.57079	17.854	0.07455	3	1
1	5	0.5915	20.2874	0.136095	10.1437	1.69062	11.8343	0.0691	6	1
1	5	0.5302	20.7469	0.125707	9.4304	1.88608	11.3165	0.0353	5	1
6	5	0.15025	19.9667	0.0372712	0	0	0	0.14655	0	0
6	5	0.1069	37.4181	0.0724977	0	0	0	0.94125	0	0
6	5	0.19625	25.4777	0.0825478	0	0	0	0.22095	0	0
6	5	0.21535	23.218	0.112375	9.28721	0	0	2.38415	2	0
6	5	0.11665	25.718	0.0330047	0	0	0	0.5312	0	0
6	5	0.1543	19.4426	0.0392093	0	0	0	0.174	0	0
6	5	0.143	27.972	0.124476	0	0	0	0.5134	0	0
6	5	0.16645	18.0234	0.017723	6.00781	0	0	0.33435	1	0
6	5	0.1954	25.5885	0.126407	0	0	5.11771	0.132	0	0
6	5	0.19685	25.4001	0.122174	0	5.08001	5.08001	0.178	0	1
6	5	0.1639	24.4051	0.144295	0	6.10128	0	0.1909	0	1
6	5	0.1249	24.0192	0.0388311	0	0	0	0.59485	0	0
6	5	0.2109	18.9663	0.0196776	0	0	0	1.47935	0	0
6	5	0.1031	29.098	0.0902037	0	0	0	0.3202	0	0
6	5	0.11185	26.8216	0.0572195	0	0	0	0.476	0	0
6	5	0.15885	25.181	0.0358829	0	0	0	0.21485	0	0
6	5	0.1484	20.2156	0.00303235	0	0	0	0.448	0	0
6	5	0.1509	19.8807	0.0387674	0	0	0	0.4238	0	0
6	5	0.20775	19.2539	0.0466907	0	0	0	0.30925	0	0
6	5	0.19885	20.1157	0.0279105	0	0	0	4.0832	0	0
6	5	0.11085	27.0636	0.0672079	0	0	0	0.9036	0	0
6	5	0.11315	26.5135	0.122404	0	0	0	0.28	0	0
6	5	0.21095	18.9618	0.0831951	0	0	0	0.4799	0	0
6	5	0.23325	17.149	0.0113612	0	0	4.28725	0.0525	0	0
6	5	0.1628	24.57	0.0730958	0	6.14251	6.14251	0.0518	0	1
6	5	0.212	18.8679	0.0561321	0	4.71698	4.71698	0.05015	0	1
6	5	0.1765	16.9972	0.0186969	0	5.66572	0	0.209	0	1
6	5	0.15425	19.4489	0.0531605	6.48298	0	0	0.2555	1	0
6	5	0.1032	29.0698	0.0227713	0	0	0	0.1311	0	0
6	5	0.1148	26.1324	0.0805749	0	0	8.7108	0.1096	0	0
6	5	0.2109	14.2248	0.0367473	0	0	4.74158	0.09015	0	0
6	5	0.2115	14.1844	0.0184397	0	0	4.72813	0.18265	0	0
6	5	0.15745	25.4049	0.0708161	0	0	0	0.80565	0	0
6	5	0.20535	24.3487	0.131726	4.86973	0	0	0.3186	1	0
6	5	0.2128	23.4962	0.081532	4.69925	0	0	1.8855	1	0
6	5	0.20555	24.325	0.124544	0	0	0	0.4261	0	0
6	5	0.1086	27.6243	0.0616943	0	0	0	0.53835	0	0
6	5	0.1628	24.57	0.0660319	24.57	0	6.14251	0.13045	4	0
6	5	0.2128	23.4962	0.0636748	0	0	0	0.43405	0	0
6	5	0.159	25.1572	0.11761	0	0	0	0.61295	0	0
6	5	0.15835	25.2605	0.122829	6.31512	0	0	0.6468	1	0
6	5	0.20625	14.5455	0.00242424	0	0	0	0.75585	0	0
6	5	0.25695	23.3508	0.110333	0	11.6754	3.89181	0.20865	0	3
6	5	0.146	27.3973	0.108219	0	0	6.84932	0.07345	0	0
6	5	0.2512	19.9045	0.0965366	0	3.98089	3.98089	0.0612	0	1
6	5	0.20435	19.5743	0.0709567	4.89356	0	4.89356	0.0624	1	0
6	5	0.21145	23.6463	0.053677	0	4.72925	9.4585	0.00615	0	1
6	5	0.25585	23.4512	0.112761	7.81708	0	3.90854	0.14055	2	0
6	5	0.21025	23.7812	0.0627824	0	0	0	0.2379	0	0
6	5	0.2117	23.6183	0.130137	0	4.72367	0	0.87725	0	1
6	5	0.2514	23.8663	0.105807	0	0	7.95545	0.0135	0	0
6	5	0.265	22.6415	0.118868	3.77358	3.77358	0	0.3274	1	1
6	5	0.2986	23.4427	0.10499	6.69792	3.34896	3.34896	0.13795	2	1
6	5	0.26185	22.9139	0.109796	0	7.63796	0	0.5126	0	2
6	5	0.27445	21.8619	0.116597	3.64365	0	0	1.846	1	0
6	5	0.2162	23.1267	0.100139	0	0	0	0.37425	0	0
6	5	0.2328	21.4777	0.132517	8.59107	4.29553	8.59107	0.08265	2	1
6	5	0.26345	18.9789	0.100778	11.3874	0	7.59157	0.24715	3	0
6	5	0.22085	22.6398	0.119765	9.05592	0	4.52796	0.0137	2	0
6	5	0.20145	24.8201	0.0421941	0	0	0	0.63085	0	0
6	5	0.11325	26.4901	0.0516556	0	0	0	0.3065	0	0
6	5	0.16155	18.5701	0.0402352	0	6.19003	0	0.50805	0	1
6	5	0.2102	23.7869	0.102997	0	0	0	0.8806	0	0
6	5	0.1039	28.8739	0.0240616	0	0	0	0.25985	0	0
6	5	0.1319	30.326	0.0917362	0	0	0	0.60155	0	0
6	5	0.2025	19.7531	0.0387654	0	0	0	1.0065	0	0
6	5	0.1482	26.9906	0.00607287	0	0	0	0.7333	0	0
6	5	0.0996	30.1205	0.00351406	0	0	10.0402	0.09915	0	0
6	5	0.11555	25.9628	0.0173085	0	0	0	1.39785	0	0
6	5	0.1004	29.8805	0.0413347	0	0	0	0.1691	0	0
6	5	0.269	22.3048	0.1329	0	0	0	1.3722	0	0
6	5	0.2586	15.4679	0.0570379	3.86698	0	0	0.2597	1	0
6	5	0.1566	19.1571	0.0210728	0	0	0	1.45485	0	0
6	5	0.15825	18.9573	0.0546603	0	0	0	0.66825	0	0
6	5	0.15245	26.2381	0.0708429	0	0	0	2.65965	0	0
6	5	0.3247	18.4786	0.0742224	0	0	0	1.22325	0	0
6	5	0.0962	31.185	0.0696466	0	0	0	0.1259	0	0
6	5	0.10325	29.0557	0.0305085	0	0	0	0.53845	0	0
6	5	0.1882	21.254	0.0294899	0	5.3135	0	0.3035	0	1
6	5	0.25295	23.7201	0.10931	0	0	0	1.06295	0	0
6	5	0.30665	22.8273	0.151965	3.26105	0	0	0.77195	1	0
6	5	0.21225	23.5571	0.0812721	4.71143	0	0	1.78285	1	0
6	5	0.3048	22.9659	0.142388	0	3.28084	0	0.3289	0	1
6	5	0.22355	22.3664	0.113621	0	0	0	0.55965	0	0
6	5	0.20115	24.8571	0.0974397	0	0	0	0.65775	0	0
6	5	0.26105	22.9841	0.111856	0	0	3.83068	0.20925	0	0
6	5	0.24975	20.02	0.0866867	0	0	0	1.5561	0	0
6	5	0.261	22.9885	0.106897	0	0	0	0.4627	0	0
6	5	0.20035	24.9563	0.134265	0	0	0	0.22605	0	0
6	5	0.26255	22.8528	0.120739	3.8088	0	3.8088	0.15405	1	0
6	5	0.20775	24.0674	0.103971	0	0	0	0.6008	0	0
6	5	0.21375	23.3918	0.139649	0	0	0	0.4963	0	0
6	5	0.10395	28.86	0.0957191	0	0	0	0.35735	0	0
6	5	0.1602	24.9688	0.082397	0	0	0	1.1095	0	0
6	5	0.0911	32.9308	0.110867	0	0	0	0.27355	0	0
6	5	0.15575	32.1027	0.0189406	0	0	0	1.9193	0	0
6	5	0.2426	24.7321	0.0985161	0	0	0	0.7727	0	0
6	5	0.286	24.4755	0.133741	3.4965	0	0	1.32945	1	0
6	5	0.3509	25.6483	0.100741	0	0	2.84981	0.21955	0	0
6	5	0.20365	19.6415	0.0824945	0	0	9.82077	0.0505	0	0
6	5	0.25315	19.7511	0.069919	3.95023	3.95023	0	2.0012	1	1
6	5	0.1093	27.4474	0.00365965	0	0	0	0.1818	0	0
6	5	0.14725	20.3735	0.0580645	0	0	0	0.39425	0	0
6	5	0.2004	24.9501	0.0883234	0	0	0	1.85845	0	0
6	5	0.2513	23.8758	0.0911261	0	0	0	0.56325	0	0
6	5	0.29705	20.1986	0.0584077	0	0	0	0.4203	0	0
6	5	0.19105	20.9369	0.0492018	5.23423	5.23423	5.23423	0.0643	1	1
6	5	0.1557	25.6904	0.039499	0	0	6.42261	0.0017	0	0
6	5	0.14885	20.1545	0.032919	0	0	0	0.19045	0	0
6	5	0.1942	25.7467	0.0944902	0	0	0	0.23325	0	0
6	5	0.1437	27.8358	0.0254001	0	0	0	0.36725	0	0
6	5	0.26215	22.8877	0.0865916	0	0	3.81461	0.1178	0	0
6	5	0.2045	14.6699	0.0134474	0	4.88998	0	2.1279	0	1
6	5	0.1986	20.141	0.0647029	0	0	0	2.28665	0	0
6	5	0.1514	19.8151	0.00264201	0	6.60502	0	3.56	0	1
6	5	0.25555	19.5656	0.0583056	0	0	0	1.7642	0	0
6	5	0.23995	20.8377	0.030423	0	0	0	0.73665	0	0
6	5	0.2596	15.4083	0.00442989	0	0	0	0.8694	0	0
6	5	0.2583	23.2288	0.0588463	0	0	0	0.5683	0	0
6	5	0.35725	19.5941	0.0529041	2.79916	2.79916	2.79916	0.1076	1	1
6	5	0.2026	24.6792	0.0676209	4.93583	0	0	1.03815	1	0
6	5	0.19975	25.0313	0.0933667	0	0	0	1.36865	0	0
6	5	0.21525	23.2288	0.100581	0	0	0	0.51805	0	0
6	5	0.24895	24.1012	0.151637	0	4.01687	4.01687	0.10965	0	1
6	5	0.20625	24.2424	0.0981818	0	0	4.84848	0.11245	0	0
6	5	0.20545	24.3368	0.0983208	0	9.73473	9.73473	0.1743	0	2
6	5	0.3058	19.6207	0.0843689	0	0	3.27011	0.25515	0	0
6	5	0.25195	23.8142	0.101409	0	0	0	0.40425	0	0
6	5	0.2061	24.2601	0.0652596	0	0	4.85201	0.12315	0	0
6	5	0.2101	23.7982	0.0818658	0	0	0	1.9779	0	0
6	5	0.2043	24.4738	0.118943	0	0	4.89476	0.05175	0	0
6	5	0.20315	24.6124	0.157765	0	0	0	0.90895	0	0
6	5	0.21475	23.2829	0.142724	0	0	0	1.201	0	0
6	5	0.2039	24.5218	0.0718489	4.90436	0	0	1.0937	1	0
6	5	0.1949	25.6542	0.0659312	0	0	0	0.9119	0	0
6	5	0.30455	22.9847	0.120341	0	3.28353	0	1.6667	0	1
6	5	0.2527	23.7436	0.100712	0	0	3.95726	0.04135	0	0
6	5	0.19615	25.4907	0.0881978	0	0	0	3.13155	0	0
6	5	0.2139	23.3754	0.084619	0	0	0	0.7537	0	0
6	5	0.1412	28.3286	0.0566572	0	0	0	0.4539	0	0
6	5	0.19765	25.2972	0.110043	0	0	0	1.024	0	0
6	5	0.19615	25.4907	0.135865	5.09814	0	0	0.6265	1	0
6	5	0.16195	24.699	0.133374	0	0	0	1.09385	0	0
6	5	0.21055	23.7473	0.088815	4.74947	0	0	0.56235	1	0
6	5	0.32335	21.6484	0.0940158	3.09262	0	0	0.90695	1	0
6	5	0.2255	22.1729	0.108426	0	0	0	1.0035	0	0
6	5	0.3176	22.0403	0.0481738	0	3.14861	0	3.6953	0	1
6	5	0.21205	23.5793	0.0969111	0	0	0	0.73435	0	0
6	5	0.2939	23.8176	0.134059	3.40252	0	0	0.68855	1	0
6	5	0.25625	23.4146	0.106341	0	3.90244	0	0.52155	0	1
6	5	0.21345	23.4247	0.0726165	0	0	4.68494	0.0083	0	0
6	5	0.16515	24.2204	0.0881017	0	0	0	0.28355	0	0
6	5	0.2354	21.2404	0.0505523	0	0	4.24809	0.2191	0	0
6	5	0.25065	19.9481	0.0975464	0	0	0	0.35315	0	0
6	5	0.2482	24.1741	0.0870266	4.02901	0	8.05802	0.19945	1	0
6	5	0.33825	17.7384	0.124612	0	0	0	0.67885	0	0
6	5	0.26065	23.0194	0.11855	7.67312	0	0	0.43245	2	0
6	5	0.1991	25.113	0.109744	5.0226	5.0226	0	0.52805	1	1
6	5	0.29795	23.4939	0.162779	0	3.35627	3.35627	0.1125	0	1
6	5	0.25475	23.5525	0.140922	0	0	0	1.28345	0	0
6	5	0.30395	23.0301	0.106596	0	0	0	0.37135	0	0
6	5	0.14145	28.2785	0.086603	0	0	0	0.1624	0	0
6	5	0.24295	24.6964	0.126569	0	0	4.11607	0.1056	0	0
6	5	0.1526	26.2123	0.125819	0	0	0	0.29235	0	0
6	5	0.2607	23.015	0.103184	0	0	0	0.84825	0	0
6	5	0.2094	23.8777	0.093362	0	4.77555	0	1.04825	0	1
6	5	0.2535	23.6686	0.130375	0	0	0	0.79675	0	0
6	5	0.20635	24.2307	0.119215	0	0	9.69227	0.08715	0	0
6	5	0.29785	23.5018	0.0908175	0	0	0	1.00105	0	0
6	5	0.26135	22.9577	0.117084	3.82629	3.82629	3.82629	0.21605	1	1
6	5	0.29775	23.5097	0.111839	0	3.35852	0	1.0273	0	1
6	5	0.24875	24.1206	0.139497	0	0	4.0201	0.0152	0	0
6	5	0.2629	22.8224	0.106124	7.60746	11.4112	3.80373	0.2333	2	3
6	5	0.29425	23.7893	0.129482	0	0	3.39847	0.25775	0	0
6	5	0.2925	23.9316	0.116923	0	0	0	0.83705	0	0
6	5	0.2333	25.718	0.150236	4.28633	0	0	0.28	1	0
6	5	0.26765	22.4173	0.15468	0	0	0	1.5856	0	0
6	5	0.25545	19.5733	0.0792719	0	0	0	1.02385	0	0
6	5	0.29265	23.9194	0.165898	0	0	6.8341	0.19025	0	0
6	5	0.201	19.9005	0.0539801	0	0	0	0.3922	0	0
6	5	0.25895	23.1705	0.100792	3.86175	0	0	0.4984	1	0
6	5	0.15155	26.3939	0.0966678	0	0	0	0.5129	0	0
6	5	0.1658	24.1255	0.144753	0	0	0	0.6067	0	0
6	5	0.28825	24.2845	0.1634	3.46921	0	0	0.4407	1	0
6	5	0.25215	23.7954	0.115407	0	3.96589	0	0.4319	0	1
6	5	0.29825	23.4702	0.100084	0	0	0	2.0103	0	0
6	5	0.26105	22.9841	0.132925	3.83068	0	3.83068	0.1275	1	0
6	5	0.2155	23.2019	0.0918794	9.28074	0	0	0.3412	2	0
6	5	0.2602	23.0592	0.12279	0	0	3.8432	0.07435	0	0
6	5	0.2542	23.6035	0.162667	0	0	7.86782	0.0394	0	0
6	5	0.3337	23.9736	0.161822	0	0	5.99341	0.28285	0	0
6	5	0.20235	24.7097	0.116877	0	0	0	1.2656	0	0
6	5	0.2482	24.1741	0.154915	0	4.02901	4.02901	0.0002	0	1
6	5	0.18885	26.476	0.129997	0	0	0	0.46625	0	0
6	5	0.20295	24.6366	0.0973146	0	4.92732	0	0.23555	0	1
6	5	0.18445	27.1076	0.149092	0	0	5.42152	0.15905	0	0
6	5	0.2111	23.6855	0.117954	0	0	4.73709	0.20685	0	0
6	5	0.1914	26.1233	0.119122	0	10.4493	5.22466	0.161	0	2
6	5	0.1902	26.2881	0.0825447	0	0	10.5152	0.0183	0	0
6	5	0.2441	24.5801	0.137034	0	0	0	1.84825	0	0
6	5	0.208	24.0385	0.133413	0	0	0	2.88385	0	0
6	5	0.24025	24.974	0.105723	0	0	0	0.977	0	0
6	5	0.2443	24.56	0.113999	0	0	0	1.3892	0	0
6	5	0.1995	25.0627	0.117794	5.01253	0	0	1.24005	1	0
6	5	0.2031	24.6184	0.102413	0	0	0	0.75655	0	0
6	5	0.24165	24.8293	0.130561	0	0	0	1.12065	0	0
6	5	0.2956	23.6806	0.108931	0	0	3.38295	0.11525	0	0
6	5	0.2389	33.4868	0.14797	0	0	0	1.0805	0	0
6	5	0.25915	23.1526	0.109782	0	0	7.71754	0.1768	0	0
6	5	0.2167	32.3027	0.123904	0	0	0	4.33945	0	0
6	5	0.2341	25.6301	0.133704	0	0	0	0.8002	0	0
6	5	0.19045	26.2536	0.102652	0	0	5.25072	0.18085	0	0
6	5	0.14405	27.7681	0.0558834	0	0	0	1.01405	0	0
6	5	0.1922	26.0146	0.0978148	0	0	5.20291	0.1624	0	0
6	5	0.1934	25.8532	0.0990176	0	0	0	0.2828	0	0
6	5	0.2371	25.3058	0.128216	0	0	0	1.7492	0	0
6	5	0.23925	25.0784	0.110345	0	0	0	0.2445	0	0
6	5	0.24745	24.2473	0.0838553	0	0	0	0.84415	0	0
6	5	0.2473	24.262	0.110594	0	0	0	2.10225	0	0
6	5	0.20205	24.7463	0.121257	0	0	4.94927	0.19455	0	0
6	5	0.23505	25.5265	0.122102	0	0	4.25441	0.20675	0	0
6	5	0.18965	26.3644	0.131558	0	0	0	0.32855	0	0
6	5	0.25095	23.9091	0.0711297	0	3.98486	11.9546	0.079	0	1
6	5	0.2017	24.7893	0.113039	4.95786	0	0	1.4299	1	0
6	5	0.25055	23.9473	0.130513	3.99122	3.99122	0	0.2671	1	1
6	5	0.23825	25.1836	0.116474	0	0	4.19727	0.15345	0	0
6	5	0.27895	25.0941	0.124216	3.58487	0	0	1.1392	1	0
6	5	0.2535	23.6686	0.0911243	0	0	3.94477	0.084	0	0
6	5	0.24345	24.6457	0.122818	0	0	0	0.65585	0	0
6	5	0.2436	24.6305	0.140599	4.10509	0	0	0.90425	1	0
6	5	0.2466	24.3309	0.104217	4.05515	0	0	3.0576	1	0
6	5	0.2844	24.6132	0.103727	0	0	0	1.88615	0	0
6	5	0.28035	24.9688	0.0904227	0	0	0	0.65705	0	0
6	5	0.28895	24.2256	0.172694	0	0	0	0.3746	0	0
6	5	0.2001	24.9875	0.144428	0	0	0	4.1953	0	0
6	5	0.25095	23.9091	0.171947	0	0	0	2.63685	0	0
6	5	0.24025	24.974	0.136316	0	0	0	1.4467	0	0
6	5	0.2939	23.8176	0.106839	0	0	0	2.1171	0	0
6	5	0.29755	26.8862	0.134767	0	0	0	0.59465	0	0
6	5	0.19555	25.5689	0.111992	0	0	0	2.4237	0	0
6	5	0.23435	25.6027	0.135694	0	0	4.26712	0.1309	0	0
6	5	0.28855	24.2592	0.114365	0	0	0	0.4711	0	0
6	5	0.25835	27.095	0.126766	7.74144	0	3.87072	0.2192	2	0
6	5	0.205	24.3902	0.0990244	0	0	4.87805	0.11745	0	0
6	5	0.28805	24.3013	0.115952	0	0	0	0.5585	0	0
6	5	0.3002	23.3178	0.127748	0	0	0	2.60865	0	0
6	5	0.2428	24.7117	0.116969	0	0	0	1.1247	0	0
6	5	0.29225	23.9521	0.113601	0	3.42173	0	2.1691	0	1
6	5	0.29575	23.6686	0.1388	0	0	0	0.7696	0	0
6	5	0.3011	23.2481	0.161076	3.32116	0	0	1.14985	1	0
6	5	0.3264	24.5098	0.146752	3.06373	0	3.06373	0.2683	1	0
6	5	0.24155	24.8396	0.129994	8.27986	0	0	0.26665	2	0
6	5	0.2967	23.5929	0.141557	0	0	0	1.0508	0	0
6	5	0.2412	24.8756	0.146766	4.14594	0	0	1.39715	1	0
6	5	0.29	24.1379	0.181034	6.89655	3.44828	0	2.801	2	1
6	5	0.29575	23.6686	0.13153	0	0	0	0.8356	0	0
6	5	0.24255	24.7372	0.109462	0	4.12286	0	0.94175	0	1
6	5	0.25525	23.5064	0.107738	0	0	0	0.9936	0	0
6	5	0.2032	24.6063	0.155512	0	0	0	3.29045	0	0
6	5	0.29595	23.6526	0.124514	0	0	0	1.657	0	0
6	5	0.2462	24.3704	0.110885	4.06174	4.06174	0	0.3278	1	1
6	5	0.2546	23.5664	0.10762	0	0	0	0.7566	0	0
6	5	0.33535	23.8557	0.168928	2.98196	0	2.98196	0.1363	1	0
6	5	0.29815	23.4781	0.150595	3.35402	0	0	0.4289	1	0
6	5	0.33425	23.9342	0.111444	0	2.99177	0	3.58095	0	1
6	5	0.34095	23.4639	0.144743	0	0	0	1.794	0	0
6	5	0.2998	23.3489	0.153269	0	0	0	0.8166	0	0
6	5	0.25375	23.6453	0.171429	0	0	0	3.10135	0	0
6	5	0.2048	24.4141	0.160889	0	0	0	1.6353	0	0
6	5	0.25585	23.4512	0.125269	0	0	0	0.4439	0	0
6	5	0.26355	22.7661	0.144565	3.79435	0	0	2.47865	1	0
6	5	0.3013	23.2327	0.166114	0	0	0	1.1581	0	0
6	5	0.27005	22.2181	0.162933	0	3.70302	0	0.8301	0	1
6	5	0.3248	24.6305	0.145012	0	0	3.07882	0.1072	0	0
6	5	0.2986	23.4427	0.141661	0	0	0	2.09785	0	0
6	5	0.2423	24.7627	0.142798	0	0	0	0.3863	0	0
6	5	0.29255	23.9275	0.145274	0	0	3.41822	0.09145	0	0
[truncated: 1,168 more rows]

## Sheet: Pachon
Fish ID	Age (dpf)	Swim Duration (s)	Swim Frequency (Hz)	Swim Duty Cycle	Aff Spike Rate-pre	Aff Spike Rate-swim	Aff Spike Rate-post	Refractory Period (s)	Spike Number-pre	Spike Number-swim
5	5	0.13835	21.6841	0.0878207	0	0	0	0.03065	0	0
5	5	0.20575	19.4411	0.0986634	0	9.72053	9.72053	0.09275	0	2
5	5	0.2081	24.0269	0.0963479	4.80538	19.2215	9.61076	0.07525	1	4
5	5	0.4312	13.9147	0.0818646	9.27644	4.63822	9.27644	0.06975	4	2
5	5	0.27505	21.8142	0.115797	7.27141	10.9071	10.9071	0.13485	2	3
5	5	0.25865	19.3311	0.0945293	7.73246	3.86623	7.73246	0.24555	2	1
5	5	0.1779	22.4845	0.111017	5.62114	0	5.62114	0.05795	1	0
5	5	0.24845	20.1248	0.115516	8.04991	16.0998	4.02495	0.162	2	4
5	5	0.12085	24.8242	0.0417873	0	16.5494	8.27472	0.1105	0	2
5	5	0.13605	22.0507	0.0455715	7.35024	0	7.35024	0.0348	1	0
5	5	0.5296	15.1057	0.0467334	5.66465	5.66465	3.77644	0.04315	3	3
5	5	0.1978	20.2224	0.102629	5.05561	5.05561	0	0.3296	1	1
5	5	0.42455	18.8435	0.169945	7.06631	4.71087	7.06631	0.1166	3	2
5	5	0.1831	16.3845	0.00354997	5.4615	5.4615	5.4615	0.1621	1	1
5	5	0.2539	19.6928	0.206774	11.8157	11.8157	0	0.2719	3	3
5	5	0.656	19.8171	0.241997	6.09756	3.04878	6.09756	0.0523	4	2
5	5	0.08585	34.9447	0.137449	11.6482	0	0	0.13895	1	0
5	5	0.1462	27.3598	0.0714774	6.83995	6.83995	13.6799	0.02145	1	1
5	5	0.29845	20.1039	0.120623	6.70129	0	3.35064	0.0207	2	0
5	5	0.30225	16.5426	0.0489661	9.92556	9.92556	3.30852	0.0028	3	3
5	5	0.2922	13.6893	0.0408966	3.42231	3.42231	3.42231	0.0062	1	1
5	5	0.236	21.1864	0.100636	0	0	4.23729	0.17015	0	0
5	5	0.2319	12.9366	0.00237171	8.62441	8.62441	8.62441	0.09055	2	2
5	5	0.2684	22.3547	0.168033	7.45156	7.45156	3.72578	0.25365	2	2
5	5	0.2194	18.2315	0.194166	4.55789	4.55789	0	0.42015	1	1
5	5	0.40275	17.3805	0.149597	2.48293	2.48293	0	0.4836	1	1
5	5	0.31175	16.0385	0.194226	0	6.4154	3.2077	0.00565	0	2
5	5	0.76365	13.095	0.0783736	2.619	5.238	10.476	0.0078	2	4
5	5	0.30315	19.7922	0.208808	6.59739	6.59739	6.59739	0.15155	2	2
5	5	0.38915	20.5576	0.13825	12.8485	5.13941	10.2788	0.1267	5	2
5	5	0.97175	12.3489	0.0397222	7.2035	4.11629	4.11629	0.2395	7	4
5	5	0.26145	22.9489	0.158921	7.64965	0	7.64965	0.1675	2	0
5	5	0.3038	23.0415	0.0946346	3.29164	6.58328	13.1666	0.07095	1	2
5	5	0.52665	13.2916	0.103199	9.49397	7.59518	3.79759	0.01485	5	4
5	5	0.59205	20.2686	0.163584	5.06714	6.75619	6.75619	0.4179	3	4
5	5	0.1979	20.2122	0.125316	0	0	5.05306	0.19765	0	0
5	5	0.25215	19.8295	0.112631	0	0	11.8977	0.0043	0	0
5	5	0.12315	24.3605	0.0487211	8.12018	8.12018	8.12018	0.0909	1	1
5	5	0.20595	19.4222	0.143481	0	4.85555	4.85555	0.19305	0	1
5	5	0.2599	26.9334	0.119084	3.84763	3.84763	3.84763	0.0284	1	1
5	5	0.1993	20.0702	0.221525	5.01756	10.0351	5.01756	0.09465	1	2
5	5	0.25255	19.7981	0.189863	19.7981	7.91922	7.91922	0.13085	5	2
5	5	0.26545	18.8359	0.0996421	3.76719	11.3016	15.0688	0.0358	1	3
5	5	0.2182	22.9148	0.0703483	4.58295	9.1659	4.58295	0.14215	1	2
5	5	0.24625	20.3046	0.0911675	12.1827	4.06091	8.12183	0.01375	3	1
5	5	0.30375	19.7531	0.174156	3.29218	0	3.29218	0.1206	1	0
5	5	0.22925	21.8103	0.0512541	4.36205	0	4.36205	0.1571	1	0
5	5	0.5292	17.0068	0.137377	3.77929	3.77929	1.88964	0.14795	2	2
5	5	0.2154	23.2126	0.0879759	0	0	0	0.80665	0	0
5	5	0.29925	13.3668	0.0305764	0	0	3.34169	0.25835	0	0
5	5	0.17935	22.3028	0.132423	5.57569	5.57569	5.57569	0.00245	1	1
5	5	0.18405	21.7332	0.0201032	5.43331	5.43331	5.43331	0.01965	1	1
5	5	0.20415	19.5934	0.0629439	19.5934	9.79672	9.79672	0.01365	4	2
5	5	0.38235	20.9232	0.243363	0	5.23081	7.84621	0.08025	0	2
5	5	0.23845	20.9688	0.235479	4.19375	8.3875	8.3875	0.05455	1	2
5	5	0.17435	22.9424	0.191282	0	5.73559	0	0.28185	0	1
5	5	0.34115	20.5188	0.0951194	5.86252	2.93126	2.93126	0.1544	2	1
5	5	0.10485	28.6123	0.0104912	9.53743	9.53743	9.53743	0.0024	1	1
5	5	0.4022	17.4043	0.130408	2.48633	9.9453	9.9453	0.0542	1	4
5	5	0.34	17.6471	0.172647	8.82353	5.88235	2.94118	0.04045	3	2
5	5	0.64415	17.0768	0.246604	4.6573	3.10487	7.76217	0.04855	3	2
5	5	0.4971	14.0817	0.0876081	8.04667	4.02334	0	0.5137	4	2
5	5	0.2616	15.2905	0.0466361	0	3.82263	7.64526	0.1405	0	1
5	5	0.20565	19.4505	0.088743	9.72526	4.86263	4.86263	0.00425	2	1
5	5	0.19055	20.9919	0.0795067	0	5.24797	5.24797	0.18225	0	1
5	5	0.17315	17.326	0.0516893	0	11.5507	5.77534	0.03595	0	2
5	5	0.49035	14.2755	0.130111	6.11808	4.07872	10.1968	0.01885	3	2
5	5	0.1233	24.3309	0.0413625	16.2206	24.3309	8.1103	0.09765	2	3
5	5	0.25595	19.5351	0.102168	15.6281	23.4421	3.90701	0.0067	4	6
5	5	0.1726	23.175	0.0521437	17.3812	17.3812	11.5875	0.0227	3	3
5	5	0.20165	19.8364	0.0592611	4.95909	4.95909	9.91818	0.0298	1	1
5	5	0.1766	22.6501	0.0696489	0	11.325	0	0.36755	0	2
5	5	0.19155	20.8823	0.170452	10.4411	5.22057	0	0.19195	2	1
5	5	0.3332	15.006	0.0747299	6.0024	6.0024	9.0036	0.1404	2	2
5	5	0.59585	18.461	0.279265	8.39137	3.35655	6.7131	0.00745	5	2
5	5	0.2098	19.0658	0.0633937	4.76644	4.76644	0	0.23045	1	1
5	5	0.16515	18.1653	0.110203	6.0551	12.1102	12.1102	0.04765	1	2
5	5	0.10695	28.0505	0.0603086	9.35016	0	9.35016	0.0414	1	0
5	5	0.1095	27.3973	0.128311	9.13242	0	0	0.18345	1	0
5	5	0.18395	21.745	0.128568	5.43626	10.8725	10.8725	0.0688	1	2
5	5	0.1578	31.6857	0.116603	12.6743	0	6.33714	0.003	2	0
5	5	0.4113	14.5879	0.0656455	9.72526	7.29395	9.72526	0.0914	4	3
5	5	0.16725	23.9163	0.0481315	5.97907	0	11.9581	0.005	1	0
5	5	0.32215	18.6249	0.166537	9.31243	3.10414	3.10414	0.07455	3	1
5	5	0.1589	31.4663	0.0742605	6.29327	12.5865	12.5865	0.0289	1	2
5	5	0.1096	27.3723	0.0433394	0	9.12409	0	0.8076	0	1
5	5	0.29605	23.6447	0.109103	0	0	10.1334	0.0834	0	0
5	5	0.33105	18.1242	0.199064	6.04138	6.04138	3.02069	0.10675	2	2
5	5	0.30885	16.1891	0.0874211	0	12.9513	6.47564	0.05505	0	4
5	5	0.5554	21.606	0.205257	7.20202	5.40151	9.00252	0.06415	4	3
5	5	0.30845	12.9681	0.0588426	6.48403	9.72605	9.72605	0.2528	2	3
5	5	0.25925	19.2864	0.128447	3.85728	15.4291	11.5718	0.03035	1	4
5	5	0.11485	26.121	0.0413583	0	8.70701	8.70701	0.00735	0	1
5	5	0.2293	21.8055	0.153511	8.7222	8.7222	8.7222	0.1326	2	2
5	5	0.1912	20.9205	0.0933577	5.23013	5.23013	5.23013	0.1078	1	1
5	5	0.1213	24.7321	0.0482275	8.24402	0	8.24402	0.0066	1	0
5	5	0.3193	21.923	0.145788	15.6593	6.2637	15.6593	0.0471	5	2
5	5	0.224	22.3214	0.185714	8.92857	0	0	0.59195	2	0
5	5	0.48755	16.4086	0.112501	0	4.10214	2.05107	0.22405	0	2
5	5	0.22715	17.6095	0.0686771	4.40238	13.2071	8.80475	0.18035	1	3
5	5	0.26725	18.7091	0.126848	11.2254	7.48363	3.74181	0.1585	3	2
5	5	0.1757	22.7661	0.0278884	5.69152	11.383	0	0.22805	1	2
5	5	0.22375	17.8771	0.0909497	4.46927	8.93855	0	0.4314	1	2
5	5	0.20845	19.1893	0.0578076	9.59463	19.1893	9.59463	0.00525	2	4
5	5	0.1061	28.2752	0.0301602	0	9.42507	0	0.14315	0	1
5	5	0.1884	15.9236	0.0642251	0	15.9236	15.9236	0.034	0	3
5	5	0.1111	27.0027	0.180918	0	0	0	0.3354	0	0
5	5	0.39275	15.2769	0.0444303	2.54615	5.0923	10.1846	0.00285	1	2
5	5	0.122	24.5902	0.0897541	8.19672	16.3934	16.3934	0.02305	1	2
5	5	0.13995	21.4362	0.0657378	0	7.14541	14.2908	0.0237	0	1
5	5	1.72215	13.9361	0.17873	8.71004	7.5487	6.96803	0.05055	15	13
5	5	0.4456	22.4417	0.104915	6.7325	11.2208	4.48833	0.1554	3	5
5	5	0.3357	17.8731	0.159964	8.93655	2.97885	8.93655	0.0668	3	1
5	5	0.57045	15.777	0.145499	7.01201	7.01201	12.271	0.0115	4	4
5	5	0.1182	25.3807	0.0118443	8.46024	0	0	0.46515	1	0
5	5	0.3979	12.566	0.0513948	0	10.0528	10.0528	0.1689	0	4
5	5	0.4578	15.2905	0.0572302	6.55308	4.36872	13.1062	0.0581	3	2
5	5	0.4529	19.8719	0.118017	13.248	8.83197	17.6639	0.07015	6	4
5	5	0.169	23.6686	0.147337	11.8343	17.7515	17.7515	0.0287	2	3
5	5	0.1599	31.2695	0.115072	6.25391	12.5078	6.25391	0.07345	1	2
5	5	0.4795	16.684	0.0561001	12.513	4.17101	10.4275	0.1265	6	2
5	5	0.34965	20.02	0.11726	14.3	5.72001	8.58001	0.13155	5	2
5	5	0.4751	14.7337	0.0427278	8.41928	8.41928	6.31446	0.06205	4	4
5	5	0.19455	20.5603	0.0647648	10.2801	15.4202	0	0.33445	2	3
5	5	0.3252	15.3752	0.0816421	6.15006	3.07503	3.07503	0.14335	2	1
5	5	0.5399	16.6698	0.169568	1.85219	7.40878	9.26097	0.0452	1	4
5	5	0.26155	19.1168	0.128274	7.64672	7.64672	19.1168	0.0143	2	2
5	5	0.30145	23.2211	0.118262	9.9519	6.6346	13.2692	0.0842	3	2
5	5	0.3333	18.0018	0.0676568	15.0015	9.0009	12.0012	0.12985	5	3
5	5	0.5875	15.3191	0.144596	11.9149	15.3191	10.2128	0.06115	7	9
5	5	0.12795	23.4467	0.0125049	7.81555	0	7.81555	0.1269	1	0
5	5	0.07275	41.2371	0.0426117	13.7457	27.4914	0	0.08585	1	2
5	5	0.1939	20.6292	0.113203	10.3146	20.6292	25.7865	0.0359	2	4
5	5	0.5463	18.305	0.12484	18.305	16.4745	10.983	0.02	10	9
5	5	0.1838	21.7628	0.078346	10.8814	16.3221	21.7628	0.0459	2	3
5	5	0.50235	11.9439	0.0867921	11.9439	5.97193	17.9158	0.1017	6	3
5	5	0.70735	14.1373	0.0781084	7.06864	21.2059	19.7922	0.0362	5	15
5	5	0.12555	23.8949	0.0414178	15.9299	23.8949	23.8949	0.0072	2	3
5	5	0.41945	19.0726	0.112648	21.4567	14.3044	14.3044	0.06235	9	6
5	5	0.1808	27.6549	0.108131	16.5929	22.1239	16.5929	0.0799	3	4
5	5	0.20635	29.0768	0.165738	19.3845	9.69227	14.5384	0.02305	4	2
5	5	0.15325	19.5759	0.00261011	6.52529	0	0	0.29765	1	0
5	5	0.20725	19.3004	0.142823	14.4753	14.4753	4.82509	0.10725	3	3
5	5	0.45035	15.5435	0.111691	4.44099	11.1025	11.1025	0.14305	2	5
5	5	0.8057	17.3762	0.149373	11.1704	8.6881	8.6881	0.07075	9	7
5	5	0.3906	12.8008	0.0332821	7.68049	7.68049	25.6016	0.00145	3	3
5	5	0.2281	21.9202	0.163963	26.3043	17.5362	13.1521	0.10085	6	4
5	5	0.26125	19.1388	0.120574	15.311	7.6555	19.1388	0.02025	4	2
5	5	0.16955	23.5919	0.136538	17.6939	23.5919	17.6939	0.03555	3	4
5	5	0.25745	19.4212	0.140221	11.6527	11.6527	15.537	0.00215	3	3
5	5	0.19885	25.1446	0.143827	10.0578	15.0867	15.0867	0.04225	2	3
5	5	0.341	14.6628	0.064956	29.3255	26.393	8.79765	0.157	10	9
5	5	0.12135	24.7219	0.170581	24.7219	8.24063	8.24063	0.02865	3	1
5	5	0.4757	18.9195	0.129178	21.0217	14.7152	8.40866	0.1798	10	7
5	5	0.28035	21.4018	0.143392	24.9688	14.2679	21.4018	0.0197	7	4
5	5	0.25825	15.4889	0.0396902	7.74443	7.74443	15.4889	0.0604	2	2
5	5	0.1625	30.7692	0.122769	24.6154	18.4615	12.3077	0.01165	4	3
5	5	0.6148	17.892	0.124431	16.2655	17.892	13.0124	0.16165	10	11
5	5	0.16785	23.8308	0.0464701	17.8731	5.9577	11.9154	0.01895	3	1
5	5	0.30605	13.0698	0.0797255	19.6046	22.8721	13.0698	0.08225	6	7
5	5	0.2307	26.0078	0.0160381	8.66927	13.0039	30.3424	0.00395	2	3
5	5	0.1068	28.0899	0.0983146	37.4532	28.0899	18.7266	0.0371	4	3
5	5	0.33825	14.782	0.0823356	23.6511	20.6948	29.5639	0.0237	8	7
5	5	0.1719	23.2693	0.0823153	23.2693	34.904	23.2693	0.0763	4	6
5	5	0.0988	30.3644	0.204453	20.2429	30.3644	10.1215	0.01405	2	3
5	5	0.44145	18.1221	0.130706	33.9789	22.6526	15.8568	0.0274	15	10
5	5	0.86015	17.4388	0.283904	16.2762	20.9266	15.1136	0.07555	14	18
5	5	0.3499	20.0057	0.157045	14.2898	14.2898	28.5796	0.0433	5	5
5	5	0.19135	20.9041	0.0425921	15.6781	10.4521	20.9041	0.00175	3	2
5	5	0.25375	19.7044	0.130443	11.8227	19.7044	7.88177	0.0593	3	5
5	5	0.39625	20.1893	0.147382	15.142	25.2366	12.6183	0.0793	6	10
5	5	0.2306	21.6826	0.110581	21.6826	13.0095	21.6826	0.02555	5	3
5	5	0.49535	22.2065	0.168063	20.1877	14.1314	14.1314	0.0843	10	7
5	5	0.1055	28.436	0.143128	28.436	18.9573	37.9147	0.005	3	2
5	5	0.17075	29.2826	0.126501	35.1391	11.713	29.2826	0.01035	6	2
5	5	0.18765	21.3163	0.11644	15.9872	21.3163	10.6581	0.11775	3	4
5	5	0.26175	19.1022	0.0615091	19.1022	22.9226	15.2818	0.1016	5	6
5	5	0.392	20.4082	0.145281	22.9592	15.3061	17.8571	0.07685	9	6
5	5	0.17425	28.6944	0.0863702	22.9555	17.2166	11.4778	0.1213	4	3
5	5	0.23155	21.5936	0.136903	12.9562	12.9562	25.9123	0.0314	3	3
5	5	0.54065	16.6466	0.186997	18.4963	20.3459	14.797	0.02045	10	11
5	5	0.119	25.2101	0.0365546	33.6134	16.8067	16.8067	0.04185	4	2
5	5	0.12225	24.5399	0.0597137	16.3599	16.3599	24.5399	0.0092	2	2
5	5	0.55005	16.3621	0.123171	18.1802	12.7261	21.8162	0.05835	10	7
5	5	0.2594	23.1303	0.0994603	23.1303	23.1303	23.1303	0.07995	6	6
5	5	0.21205	18.8635	0.149493	14.1476	9.43174	18.8635	0.0826	3	2
5	5	0.72135	19.4081	0.165939	13.8629	16.6355	15.2492	0.11805	10	12
5	5	0.2955	16.9205	0.0962775	20.3046	27.0728	13.5364	0.08485	6	8
5	5	0.1033	29.0416	0.0634076	19.3611	9.68054	19.3611	0.0648	2	1
5	5	0.35205	19.8835	0.180372	28.4051	17.043	5.68101	0.0013	10	6
5	5	0.3944	15.213	0.0798682	7.60649	27.8905	20.284	0.0303	3	11
5	5	0.11625	25.8065	0.00387097	34.4086	34.4086	17.2043	0.00545	4	4
5	5	0.222	22.5225	0.115315	27.027	36.036	13.5135	0.1032	6	8
5	5	0.30435	16.4285	0.0570067	19.7141	22.9998	19.7141	0.09955	6	7
5	5	0.26135	19.1314	0.154773	30.6103	22.9577	22.9577	0.05105	8	6
5	5	0.157	25.4777	0.0748408	25.4777	6.36943	19.1083	0.05835	4	1
5	5	0.1876	15.9915	0.00426439	21.322	15.9915	15.9915	0.0516	4	3
5	5	0.3108	16.0875	0.228121	16.0875	9.65251	28.9575	0.0424	5	3
5	5	0.27745	18.0213	0.140746	32.4383	21.6255	21.6255	0.00165	9	6
5	5	0.11635	25.7843	0.0266437	42.9738	8.59476	34.379	0.001	5	1
5	5	0.19025	21.025	0.0575558	31.5375	21.025	26.2812	0.02735	6	4
5	5	0.42475	16.4803	0.290524	25.8976	18.8346	32.9606	0.01345	11	8
5	5	0.324	18.5185	0.116975	18.5185	27.7778	21.6049	0.01605	6	9
5	5	0.37525	18.6542	0.126049	15.9893	15.9893	13.3245	0.06515	6	6
5	5	0.4467	20.1478	0.129953	29.1023	26.8637	26.8637	0.0065	13	12
5	5	0.3257	15.3516	0.0638625	21.4922	21.4922	21.4922	0.01895	7	7
5	5	0.10475	28.6396	0.0572792	38.1862	19.0931	9.54654	0.0716	4	2
5	5	0.93345	17.1407	0.195779	16.0694	16.0694	20.3546	0.02705	15	15
5	5	0.1737	23.0282	0.100748	23.0282	5.75705	23.0282	0.01075	4	1
5	5	0.4176	11.9732	0.0167625	16.7625	23.9464	14.3678	0.0759	7	10
5	5	0.18045	22.1668	0.192574	11.0834	16.6251	5.5417	0.12165	2	3
5	5	0.38235	15.6924	0.0850007	10.4616	13.077	20.9232	0.0196	4	5
5	5	0.15915	25.1335	0.0659755	18.8501	37.7003	0	0.1863	3	6
5	5	0.06165	48.6618	0.0300081	0	0	16.2206	0.02435	0	0
5	5	0.9591	12.5117	0.0489521	13.5544	18.7676	18.7676	0.0107	13	18
5	5	0.3939	15.2323	0.0251333	17.771	20.3097	25.3872	0.00455	7	8
5	5	0.177	22.5989	0.0985876	22.5989	16.9492	33.8983	0.0069	4	3
5	5	0.33995	20.5913	0.0958965	23.5329	23.5329	20.5913	0.01805	8	8
5	5	0.12655	23.706	0.0703279	23.706	31.6081	15.804	0.04885	3	4
5	5	0.41515	16.8614	0.0706973	19.2701	14.4526	7.2263	0.1245	8	6
5	5	0.3755	13.3156	0.0280959	13.3156	10.6525	23.968	0.00565	5	4
5	5	0.15175	19.7694	0.0210873	19.7694	6.58979	13.1796	0.0776	3	1
5	5	0.12125	32.9897	0.126186	24.7423	24.7423	8.24742	0.07885	3	3
5	5	0.0985	30.4569	0.101015	20.3046	20.3046	10.1523	0.09155	2	2
5	5	0.12035	24.9273	0.0589946	24.9273	8.3091	24.9273	0.0015	3	1
5	5	0.2145	18.648	0.131235	13.986	13.986	32.634	0	3	3
5	5	0.12535	23.933	0.0889509	23.933	15.9553	23.933	0.01785	3	2
5	5	0.2344	17.0648	0.0676195	25.5973	17.0648	17.0648	0.02895	6	4
5	5	0.17995	22.2284	0.0814115	16.6713	22.2284	16.6713	0.10705	3	4
5	5	0.2998	20.0133	0.173949	33.3556	13.3422	20.0133	0.0329	10	4
5	5	0.27145	18.4196	0.209983	25.7874	22.1035	29.4714	0.00445	7	6
5	5	0.3992	15.0301	0.168211	22.5451	22.5451	22.5451	0.00845	9	9
5	5	0.2682	22.3714	0.201902	22.3714	14.9142	33.557	0.01965	6	4
5	5	0.3134	19.1449	0.136567	12.7632	15.9541	12.7632	0.0476	4	5
5	5	0.5627	17.7715	0.162609	21.3258	17.7715	14.2172	0.0876	12	10
5	5	0.56605	17.6663	0.135589	19.4329	17.6663	28.2661	0.0056	11	10
5	5	0.1301	23.0592	0.0422752	46.1184	23.0592	30.7456	0.01535	6	3
5	5	0.1112	26.9784	0.0503597	53.9568	17.9856	17.9856	0.01445	6	2
5	5	0.2062	19.3986	0.0133366	24.2483	19.3986	24.2483	0.03765	5	4
5	5	0.2238	22.3414	0.102547	31.2779	4.46828	13.4048	0.0429	7	1
5	5	0.3451	23.1817	0.161258	14.4886	14.4886	26.0794	0.03435	5	5
5	5	0.1059	28.3286	0.0646837	9.44287	9.44287	9.44287	0.0281	1	1
5	5	0.18785	21.2936	0.114719	26.617	31.9404	21.2936	0.01155	5	6
5	5	0.3785	18.4941	0.121136	26.4201	10.568	10.568	0.12755	10	4
5	5	0.34365	20.3696	0.113633	14.5497	23.2795	20.3696	0.02125	5	8
5	5	0.2218	22.5428	0.0437331	18.0343	36.0685	13.5257	0.05525	4	8
5	5	0.11465	26.1666	0.00479721	43.611	8.7222	34.8888	0.02015	5	1
5	5	1.0467	16.2415	0.157591	22.9292	16.2415	16.2415	0.08245	24	17
5	5	0.1249	24.0192	0.061249	32.0256	16.0128	24.0192	0.0102	4	2
5	5	0.3097	19.3736	0.0833064	19.3736	29.0604	6.45786	0.06065	6	9
5	5	0.9173	17.4425	0.146844	20.713	22.8933	19.6228	0.03325	19	21
5	5	0.17105	23.385	0.121602	17.5387	29.2312	17.5387	0.0418	3	5
5	5	0.19625	20.3822	0.0349045	5.09554	5.09554	15.2866	0.00985	1	1
5	5	0.1257	23.8663	0.120923	15.9109	31.8218	7.95545	0.08075	2	4
5	5	0.18145	22.0446	0.146046	22.0446	33.067	27.5558	0.0829	4	6
5	5	0.10625	28.2353	0.139765	28.2353	0	28.2353	0.063	3	0
5	5	0.29195	23.9767	0.127933	17.1262	10.2757	23.9767	0.02955	5	3
5	5	0.32125	24.9027	0.104747	15.5642	18.677	28.0156	0.0395	5	6
5	5	0.3691	21.6743	0.102682	29.8022	21.6743	10.8372	0.0714	11	8
5	5	0.0801	37.4532	0.10362	24.9688	12.4844	24.9688	0.00365	2	1
5	5	0.3379	23.6756	0.201983	23.6756	26.6351	32.554	0.0322	8	9
5	5	0.4303	18.5917	0.165815	23.2396	23.2396	25.5636	0.00105	10	10
5	5	0.3285	18.2648	0.0761035	24.3531	24.3531	24.3531	0.0387	8	8
5	5	0.1112	26.9784	0.0620504	26.9784	35.9712	26.9784	0.0056	3	4
5	5	0.1659	24.1109	0.0596745	24.1109	24.1109	18.0832	0.0156	4	4
5	5	0.14725	33.9559	0.0893039	20.3735	13.5823	6.79117	0.09835	3	2
5	5	0.09755	30.7535	0.00820092	10.2512	41.0046	10.2512	0.088	1	4
5	5	0.41515	19.2701	0.107431	21.6789	28.9052	12.0438	0.14025	9	12
5	5	0.1689	23.6827	0.0834813	23.6827	17.762	11.8413	0.0091	4	3
5	5	0.17325	23.088	0.0435786	17.316	23.088	17.316	0.0594	3	4
5	5	0.2186	22.8728	0.0494053	9.14913	18.2983	27.4474	0.00715	2	4
5	5	0.37415	18.7091	0.130429	18.7091	21.3818	18.7091	0.1324	7	8
5	5	0.10975	27.3349	0.0232346	18.2232	9.11162	36.4465	0.03715	2	1
5	5	0.26695	18.7301	0.0425173	18.7301	14.9841	26.2221	0.07625	5	4
5	5	0.1213	32.9761	0.0486397	32.9761	8.24402	24.7321	0.0338	4	1
5	5	0.1174	25.5537	0.0553663	17.0358	8.51789	25.5537	0.0294	2	1
5	5	0.1404	21.3675	0.0601852	28.49	14.245	14.245	0.0516	4	2
5	5	0.11405	26.3043	0.0762823	17.5362	17.5362	17.5362	0.0043	2	2
5	5	0.18695	32.0941	0.168762	16.0471	16.0471	26.7451	0.02075	3	3
5	5	0.1109	36.0685	0.230388	36.0685	27.0514	9.01713	0.0871	4	3
5	5	0.28705	13.9349	0.0282181	20.9023	31.3534	34.8371	0.0026	6	9
5	5	0.22555	22.168	0.230548	31.0352	22.168	4.43361	0.10895	7	5
5	5	0.4467	17.9091	0.183009	8.95456	22.3864	15.6705	0.07145	4	10
5	5	0.11105	27.0149	0.0936515	9.00495	27.0149	18.0099	0.01755	1	3
5	5	0.47185	21.1932	0.152697	25.4318	16.9545	14.8352	0.0344	12	8
5	5	0.30965	12.9178	0.0125949	19.3767	19.3767	9.68836	0.0345	6	6
5	5	0.40315	24.8047	0.303857	14.8828	22.3242	12.4023	0.04555	6	9
5	5	0.18075	22.13	0.145781	33.195	27.6625	11.065	0.03385	6	5
5	5	0.19145	20.8932	0.108122	15.6699	15.6699	15.6699	0.01875	3	3
5	5	0.1763	22.6886	0.0867839	34.0329	22.6886	34.0329	0.00245	6	4
5	5	0.2683	11.1815	0.00167723	11.1815	22.363	22.363	0.0111	3	6
5	5	0.23935	20.8899	0.102361	33.4239	16.7119	8.35596	0.062	8	4
5	5	0.5379	18.5908	0.141662	27.8862	24.1681	14.8727	0.06645	15	13
5	5	0.64865	16.9583	0.152316	15.4166	12.3333	26.2083	0.01155	10	8
5	5	0.23035	21.7061	0.049924	17.3649	13.0237	17.3649	0.0143	4	3
5	5	0.1215	32.9218	0.0617284	8.23045	16.4609	32.9218	0.02325	1	2
5	5	0.6984	20.0458	0.145189	20.0458	20.0458	18.614	0.021	14	14
5	5	0.2944	20.3804	0.102072	16.9837	20.3804	20.3804	0.008	5	6
5	5	0.4392	20.4918	0.212773	27.3224	11.3843	18.2149	0.04895	12	5
5	5	0.2952	20.3252	0.114329	27.1003	23.7127	20.3252	0.06755	8	7
5	5	0.1038	28.9017	0.0929672	19.2678	28.9017	28.9017	0.01805	2	3
5	5	0.54535	16.5032	0.12955	31.1726	31.1726	29.339	0.02905	17	17
5	5	0.3214	18.6683	0.202707	21.7797	15.5569	18.6683	0.0039	7	5
5	5	0.1137	26.3852	0.0879507	17.5901	8.79507	0	0.11865	2	1
5	5	0.2002	24.975	0.140609	19.98	4.995	24.975	0.04035	4	1
5	5	0.1884	15.9236	0.0204352	15.9236	26.5393	5.30786	0.1048	3	5
5	5	0.1419	21.1416	0.0894996	0	35.2361	42.2833	0.0155	0	5
5	5	0.4689	17.0612	0.101727	14.9286	27.7245	14.9286	0.02975	7	13
5	5	0.33325	15.0038	0.106527	15.0038	18.0045	12.003	0.00285	5	6
5	5	0.42475	18.8346	0.0912301	14.126	28.2519	32.9606	0.0089	6	12
5	5	0.25245	19.8059	0.117845	23.7671	51.4953	15.8447	0.1114	6	13
5	5	0.4702	17.014	0.0759251	25.5211	23.3943	23.3943	0.03435	12	11
5	5	0.09775	30.6905	0.150895	10.2302	30.6905	20.4604	0.00355	1	3
5	5	0.16105	24.837	0.0915865	24.837	18.6278	24.837	0.0108	4	3
5	5	0.1182	25.3807	0.0596447	25.3807	25.3807	16.9205	0.0238	3	3
5	5	0.105	28.5714	0.0547619	28.5714	9.52381	19.0476	0.0234	3	1
5	5	0.21335	14.0614	0.0206234	9.37427	23.4357	23.4357	0.0854	2	5
5	5	0.11155	26.8938	0.120126	17.9292	53.7875	44.8229	0.0382	2	6
5	5	0.27205	18.379	0.0898732	25.7306	25.7306	29.4064	0.0074	7	7
5	5	0.2052	19.4932	0.0606725	24.3665	14.6199	19.4932	0.08975	5	3
5	5	0.2261	22.1141	0.0833702	13.2685	13.2685	22.1141	0.00965	3	3
5	5	0.6042	18.2059	0.123717	38.0669	39.7219	23.1711	0.0279	23	24
5	5	0.12425	24.1449	0.11831	32.1932	16.0966	48.2897	0.00495	4	2
5	5	0.16385	24.4126	0.0711016	18.3094	42.722	42.722	0.03015	3	7
5	5	0.27945	21.4707	0.0896404	25.0492	17.8923	10.7354	0.14715	7	5
5	5	0.3371	14.8324	0.0510234	23.7318	20.7654	23.7318	0.01765	8	7
5	5	0.36285	13.7798	0.055946	19.2917	24.8036	8.26788	0.0017	7	9
5	5	0.2182	18.3318	0.0318515	9.1659	9.1659	9.1659	0.1537	2	2
5	5	0.14785	20.2908	0.0395671	6.76361	6.76361	0	0.15005	1	1
5	5	0.40115	14.957	0.101708	7.4785	0	7.4785	0.0234	3	0
5	5	0.19195	31.2581	0.233655	0	0	5.20969	0.08985	0	0
5	5	0.2704	18.4911	0.1152	11.0947	18.4911	36.9822	0.0163	3	5
5	5	0.2768	25.289	0.16763	14.4509	18.0636	18.0636	0.0272	4	5
5	5	0.11955	33.4588	0.178168	0	33.4588	16.7294	0.05095	0	4
5	5	0.25585	19.5427	0.117647	19.5427	11.7256	15.6342	0.03525	5	3
5	5	0.5462	20.1391	0.133559	18.3083	12.8158	21.97	0.04805	10	7
5	5	0.2932	23.8745	0.132333	17.0532	17.0532	20.4638	0.0068	5	5
5	5	0.27765	21.6099	0.075995	21.6099	32.4149	14.4066	0.1256	6	9
5	5	0.2565	19.4932	0.125341	7.79727	23.3918	23.3918	0.00865	2	6
5	5	0.3574	19.5859	0.106883	25.1819	22.3839	11.1919	0.0512	9	8
5	5	0.34755	23.0183	0.166882	11.5091	11.5091	14.3864	0.1431	4	4
5	5	0.33925	20.6338	0.145321	23.5814	29.4768	26.5291	0.0046	8	10
5	5	0.1608	24.8756	0.115983	6.21891	31.0945	31.0945	0.02135	1	5
5	5	0.21135	23.6574	0.158978	14.1945	18.926	33.1204	0.0475	3	4
5	5	0.4701	8.50883	0.0542438	29.7809	29.7809	31.9081	0.0871	14	14
5	5	0.2493	20.0562	0.0545527	24.0674	32.0899	28.0786	0.01175	6	8
5	5	0.10385	28.8878	0.052961	48.1464	9.62927	28.8878	0.02665	5	1
5	5	0.4253	18.8103	0.114625	16.459	18.8103	14.1077	0.0534	7	8
5	5	0.30865	16.1996	0.123279	16.1996	22.6794	16.1996	0.06655	5	7
5	5	0.2335	21.4133	0.106638	17.1306	25.6959	25.6959	0.05885	4	6
5	5	0.33465	20.9174	0.0776931	17.9292	23.9056	5.97639	0.1507	6	8
5	5	0.102	29.4118	0.0367647	0	39.2157	19.6078	0.04845	0	4
5	5	0.25445	11.7901	0.00334054	27.5103	19.6502	15.7202	0.0173	7	5
5	5	0.15625	19.2	0.04448	12.8	6.4	19.2	0.01575	2	1
5	5	0.162	30.8642	0.0777778	18.5185	12.3457	6.17284	0.13015	3	2
5	5	0.19855	20.1461	0.103752	20.1461	20.1461	15.1095	0.0245	4	4
5	5	0.17225	23.2221	0.0998549	17.4165	23.2221	17.4165	0.0088	3	4
5	5	0.73155	17.7705	0.152826	19.1374	12.3026	17.7705	0.02165	14	9
5	5	0.5122	15.6189	0.0897111	17.5713	17.5713	17.5713	0.01445	9	9
5	5	0.21465	23.2937	0.104589	23.2937	9.31749	23.2937	0.0001	5	2
5	5	0.2164	23.1054	0.104667	13.8632	18.4843	13.8632	0.0035	3	4
5	5	0.10555	28.4225	0.00710564	28.4225	9.47418	9.47418	0.09465	3	1
5	5	0.27175	14.7194	0.0774609	18.3993	22.0791	25.759	0.0442	5	6
5	5	0.93795	18.1246	0.148089	24.5216	17.0585	14.9262	0.001	23	16
5	5	0.49	20.4082	0.0978571	8.16327	22.449	20.4082	0.05525	4	11
5	5	0.22595	26.5545	0.0867449	26.5545	22.1288	8.85152	0.11575	6	5
5	5	0.48285	20.7104	0.133996	18.6393	18.6393	24.8524	0.00095	9	9
5	5	0.44295	20.3183	0.110961	22.5759	18.0607	15.8031	0.0245	10	8
5	5	0.26475	22.6629	0.146742	15.1086	18.8857	11.3314	0.01465	4	5
5	5	0.23	26.087	0.0736957	17.3913	21.7391	34.7826	0.0132	4	5
5	5	0.16795	23.8166	0.070259	17.8625	29.7708	35.7249	0.0169	3	5
5	5	0.2285	21.8818	0.0730853	26.2582	30.6346	17.5055	0.0913	6	7
5	5	0.26105	19.1534	0.0593756	19.1534	11.4921	22.9841	0.0376	5	3
5	5	0.22395	26.7917	0.0875195	22.3264	8.93056	17.8611	0.0125	5	2
5	5	0.16225	24.6533	0.0644068	18.49	43.1433	30.8166	0.0205	3	7
5	5	0.2872	20.8914	0.0903552	27.8552	13.9276	20.8914	0.03275	8	4
5	5	0.1665	24.024	0.0570571	18.018	24.024	18.018	0.00125	3	4
5	5	0.4536	22.0459	0.120481	26.455	24.2504	17.6367	0.033	12	11
5	5	0.4625	12.973	0.0331892	19.4595	19.4595	25.9459	0.04485	9	9
5	5	0.377	15.9151	0.0761273	31.8302	31.8302	23.8727	0.0833	12	12
5	5	0.23635	29.6171	0.134758	33.8481	12.693	25.3861	0.0364	8	3
5	5	0.1201	24.9792	0.133222	24.9792	16.6528	24.9792	0.01365	3	2
5	5	0.64855	12.3352	0.0875029	21.5866	27.7542	30.838	0.0085	14	18
5	5	0.29615	23.6367	0.138275	27.0133	37.1433	23.6367	0.0338	8	11
5	5	0.3042	19.7239	0.126397	23.0112	32.8731	23.0112	0.0014	7	10
5	5	0.25685	23.3599	0.127312	19.4666	15.5733	31.1466	0.0427	5	4
5	5	0.2589	19.3125	0.101584	27.0375	15.45	11.5875	0.0282	7	4
5	5	0.21655	23.0894	0.159547	23.0894	32.3251	13.8536	0.06195	5	7
5	5	0.52425	17.1674	0.086886	17.1674	19.0749	17.1674	0.00515	9	10
5	5	0.36455	21.9449	0.120148	13.7155	19.2018	19.2018	0.06025	5	7
5	5	0.2196	22.7687	0.115209	18.2149	36.4299	22.7687	0.06065	4	8
5	5	0.22025	22.7015	0.0794552	4.5403	18.1612	31.7821	0.01565	1	4
5	5	0.5404	18.5048	0.139341	16.6543	25.9067	20.3553	0.00685	9	14
5	5	0.2824	21.2465	0.0915368	21.2465	17.7054	17.7054	0.0677	6	5
5	5	0.6532	16.8402	0.125842	18.3711	21.4329	18.3711	0.0761	12	14
5	5	0.10475	28.6396	0.052506	28.6396	9.54654	57.2792	0.01055	3	1
5	5	0.2356	21.2224	0.189516	21.2224	12.7334	16.9779	0.05375	5	3
5	5	0.103	29.1262	0.0485437	0	19.4175	19.4175	0.0049	0	2
5	5	0.39525	17.7103	0.0753953	22.7704	15.1803	22.7704	0.0518	9	6
5	5	0.30185	13.2516	0.0114295	26.5032	19.8774	6.62581	0.0331	8	6
5	5	0.11195	26.7977	0.0424297	0	26.7977	0	0.1406	0	3
5	5	0.4241	14.1476	0.075336	18.8635	25.9373	18.8635	0.10745	8	11
5	5	0.18175	22.0083	0.195598	27.5103	27.5103	16.5062	0.0249	5	5
5	5	0.22985	21.7533	0.0978899	21.7533	17.4027	30.4546	0.01555	5	4
5	5	0.36845	16.2844	0.0743656	16.2844	37.997	24.4267	0.0356	6	14
5	5	0.1774	28.1849	0.114994	11.274	33.8219	45.0958	0.00155	2	6
5	5	0.16495	24.2498	0.102758	6.06244	18.1873	30.3122	0.00615	1	3
5	5	0.22425	26.7559	0.120178	8.91862	26.7559	31.2152	0.00905	2	6
5	5	0.29925	16.7084	0.0340852	20.0501	16.7084	26.7335	0.04895	6	5
5	5	0.5532	18.0766	0.105025	19.8843	10.846	19.8843	0.03585	11	6
5	5	0.43395	18.4353	0.175481	18.4353	16.1309	18.4353	0.00705	8	7
5	5	0.7705	22.0636	0.230759	16.8722	22.0636	28.5529	0.09285	13	17
5	5	0.18055	22.1545	0.0919413	22.1545	16.6159	11.0773	0.01125	4	3
5	5	0.11295	26.5604	0.0185923	35.4139	17.7069	8.85347	0.10005	4	2
5	5	0.1074	27.933	0.0689013	27.933	27.933	9.31099	0.014	3	3
5	5	0.11625	25.8065	0.0387097	8.60215	17.2043	17.2043	0.0351	1	2
5	5	0.21845	22.8885	0.110323	0	18.3108	18.3108	0.04375	0	4
5	5	0.15825	25.2765	0.0729858	25.2765	31.5956	25.2765	0.09025	4	5
5	5	0.24955	24.0433	0.09998	24.0433	16.0289	20.0361	0.0177	6	4
5	5	0.22055	27.2047	0.146452	31.7388	27.2047	9.06824	0.06585	7	6
5	5	0.154	25.974	0.0642857	25.974	19.4805	25.974	0.00965	4	3
5	5	0.2168	23.0627	0.117159	18.4502	27.6753	13.8376	0.02985	4	6
5	5	0.10695	28.0505	0.0392707	0	56.101	0	0.1341	0	6
5	5	0.4017	14.9365	0.120239	17.4259	24.8942	17.4259	0.0007	7	10
5	5	0.37515	18.6592	0.0817007	15.9936	18.6592	21.3248	0.0492	6	7
5	5	0.34805	14.3658	0.0543025	22.9852	31.6047	17.2389	0.13775	8	11
5	5	0.10585	28.342	0.0529051	37.7893	9.44733	56.684	0.03425	4	1
5	5	0.22255	22.4669	0.0975062	22.4669	22.4669	22.4669	0.03495	5	5
5	5	0.31585	12.6642	0.0289694	25.3285	18.9964	18.9964	0.0257	8	6
5	5	0.373	16.0858	0.0541555	18.7668	26.8097	26.8097	0.01305	7	10
5	5	0.1048	28.626	0.0682252	47.7099	19.084	9.54198	0.0458	5	2
5	5	0.94515	10.5803	0.0775538	21.1607	20.1026	34.9151	0.02985	20	19
5	5	0.1516	26.3852	0.109499	26.3852	32.9815	26.3852	0.08305	4	5
5	5	0.14975	20.0334	0.0644407	6.6778	26.7112	13.3556	0.09605	1	4
5	5	0.37305	21.4448	0.120091	8.04182	32.1673	24.1255	0.0143	3	12
5	5	0.27235	18.3587	0.0919772	25.7022	18.3587	14.687	0.0934	7	5
5	5	0.11455	26.1894	0.123963	26.1894	34.9192	34.9192	0.0074	3	4
5	5	0.1862	21.4823	0.108485	16.1117	16.1117	10.7411	0.08595	3	3
5	5	0.18795	26.6028	0.118117	21.2823	26.6028	21.2823	0.01935	4	5
5	5	0.43985	18.188	0.183472	18.188	20.4615	29.5555	0.05525	8	9
5	5	0.44765	20.105	0.112476	24.5728	15.6372	22.3389	0.02225	11	7
5	5	0.48325	18.6239	0.0602173	16.5546	16.5546	20.6932	0.0441	8	8
5	5	0.16625	24.0602	0.0911278	24.0602	18.0451	42.1053	0.00035	4	3
5	5	0.1704	23.4742	0.186033	17.6056	23.4742	5.86854	0.13905	3	4
5	5	0.326	18.4049	0.0555215	15.3374	12.2699	18.4049	0.02935	5	4
5	5	0.30835	19.4584	0.121129	19.4584	19.4584	16.2153	0.0091	6	6
5	5	0.5721	17.4795	0.0658102	26.2192	19.2274	15.7315	0.0241	15	11
5	5	0.82985	15.6655	0.10297	14.4604	18.0756	22.8957	0.13625	12	15
5	5	0.2859	20.9864	0.0764253	31.4795	27.9818	10.4932	0.05315	9	8
5	5	0.09545	31.4301	0.0209534	20.9534	52.3834	0	0.17315	2	5
5	5	0.2823	21.254	0.145058	7.08466	21.254	21.254	0.01375	2	6
5	5	0.6699	11.9421	0.0658307	17.9131	20.8986	13.4348	0.04795	12	14
5	5	0.21605	23.1428	0.166397	13.8857	13.8857	9.25712	0.00675	3	3
5	5	0.4506	15.5348	0.10364	17.7541	26.6312	11.0963	0.10025	8	12
5	5	0.5079	17.72	0.117838	15.7511	23.6267	27.5645	0.0194	8	12
5	5	0.31765	18.8887	0.118212	31.4812	15.7406	28.3331	0.0113	10	5
5	5	0.23225	21.5285	0.153283	17.2228	17.2228	12.9171	0.047	4	4
5	5	0.24355	24.6356	0.189694	36.9534	12.3178	16.4237	0.05455	9	3
5	5	0.24165	20.6911	0.0887647	33.1057	12.4146	20.6911	0.06045	8	3
5	5	0.33705	20.7684	0.0674974	14.8346	20.7684	17.8015	0.06145	5	7
5	5	0.2775	25.2252	0.136937	18.018	21.6216	10.8108	0.16905	5	6
5	5	0.2075	19.2771	0.155904	19.2771	19.2771	24.0964	0.025	4	4
5	5	0.29985	23.345	0.135901	33.35	10.005	23.345	0.0441	10	3
5	5	0.3322	27.0921	0.138621	21.0716	15.0512	30.1023	0.0046	7	5
5	5	0.1785	22.409	0.12493	22.409	28.0112	33.6134	0.0113	4	5
5	5	0.6343	17.342	0.194388	22.0716	33.1074	26.8012	0.01045	14	21
5	5	0.2706	11.0865	0.0545085	22.1729	22.1729	14.782	0.0227	6	6
5	5	0.22595	26.5545	0.143837	8.85152	17.703	17.703	0.0485	2	4
5	5	0.17585	22.7467	0.113449	11.3733	22.7467	28.4333	0.0304	2	4
5	5	0.10075	29.7767	0.0243176	19.8511	9.92556	19.8511	0.03615	2	1
5	5	0.3259	15.3421	0.0929733	21.479	27.6158	9.20528	0.1472	7	9
5	5	0.10265	29.2255	0.128105	19.4837	9.74184	29.2255	0.00225	2	1
5	5	0.14665	27.2758	0.127855	27.2758	13.6379	13.6379	0.0124	4	2
5	5	0.2672	18.7126	0.103855	14.9701	26.1976	29.9401	0.0145	4	7
5	5	0.1048	28.626	0.112118	9.54198	47.7099	0	0.14355	1	5
5	5	0.12445	24.1061	0.0827642	16.0707	24.1061	24.1061	0.0151	2	3
5	5	0.2914	24.022	0.0648593	30.8854	24.022	20.5903	0.0343	9	7
5	5	0.16825	23.7741	0.0463596	17.8306	29.7177	11.8871	0.07165	3	5
5	5	0.472	14.8305	0.0846398	23.3051	23.3051	23.3051	0.00985	11	11
5	5	0.5627	14.2172	0.0804159	21.3258	30.2115	23.1029	0.01815	12	17
5	5	0.37555	15.9766	0.108374	29.2904	13.3138	26.6276	0.09195	11	5
5	5	0.46095	19.5249	0.108255	23.8638	23.8638	19.5249	0.05145	11	11
5	5	0.15035	26.6046	0.0748254	26.6046	19.9534	13.3023	0.06005	4	3
5	5	0.09935	30.1963	0.141922	20.1309	0	10.0654	0.03405	2	0
5	5	0.16165	18.5586	0.0723786	30.931	6.1862	12.3724	0.0586	5	1
5	5	0.44665	20.15	0.124594	24.6278	22.3889	17.9111	0.05655	11	10
5	5	0.109	27.5229	0.0444954	18.3486	9.17431	18.3486	0.0173	2	1
5	5	0.36765	16.3199	0.0705834	16.3199	13.5999	21.7598	0.02995	6	5
5	5	0.22215	22.5073	0.064596	31.5102	27.0088	31.5102	0.02625	7	6
5	5	0.1683	23.7671	0.0953654	23.7671	17.8253	17.8253	0.0356	4	3
5	5	0.15865	25.2127	0.101481	12.6064	12.6064	31.5159	0.0374	2	2
5	5	0.2746	18.2083	0.142935	32.7749	25.4916	29.1333	0.0664	9	7
5	5	0.43985	15.9145	0.0437649	29.5555	31.829	27.282	0.0077	13	14
5	5	0.2416	20.6954	0.123965	16.5563	33.1126	33.1126	0.01295	4	8
5	5	0.18145	22.0446	0.0573161	33.067	22.0446	22.0446	0.0722	6	4
5	5	0.2518	23.8284	0.132844	19.857	15.8856	31.7712	0.04605	5	4
5	5	0.36075	13.86	0.0364518	27.72	22.176	16.632	0.01595	10	8
5	5	0.254	23.622	0.092126	11.811	7.87402	11.811	0.03045	3	2
5	5	0.1166	25.729	0.0488851	17.1527	0	17.1527	0.01695	2	0
5	5	0.1793	22.309	0.117401	22.309	16.7317	11.1545	0.04855	4	3
5	5	0.2528	23.7342	0.145174	35.6013	7.91139	11.8671	0.0122	9	2
5	5	0.18745	26.6738	0.104028	26.6738	26.6738	26.6738	0.05615	5	5
5	5	0.4452	13.4771	0.0545822	26.9542	33.6927	31.4465	0.00645	12	15
5	5	0.1869	26.7523	0.163456	37.4532	21.4018	16.0514	0.02255	7	4
5	5	0.24225	20.6398	0.145717	20.6398	24.7678	12.3839	0.03095	5	6
5	5	0.3366	20.7962	0.138146	20.7962	29.7089	32.6797	0.04335	7	10
5	5	0.25605	19.5274	0.237649	19.5274	19.5274	15.6219	0.03835	5	5
5	5	0.1088	27.5735	0.0615809	9.19118	27.5735	0	0.13515	1	3
5	5	0.33365	23.9772	0.174884	32.9687	11.9886	14.9858	0.0358	11	4
5	5	0.29865	20.0904	0.0882304	23.4388	20.0904	6.6968	0.1502	7	6
5	5	0.17495	22.8637	0.0703058	28.5796	17.1478	22.8637	0.0491	5	3
5	5	0.2384	20.9732	0.123951	25.1678	20.9732	12.5839	0.0655	6	5
5	5	0.2985	20.1005	0.129648	33.5008	6.70017	10.0503	0.0148	10	2
5	5	0.165	24.2424	0.136364	6.06061	12.1212	24.2424	0.00465	1	2
5	5	0.11645	25.7621	0.0472306	25.7621	17.1748	8.58738	0.03415	3	2
5	5	0.3192	18.797	0.0786341	15.6642	18.797	18.797	0.0242	5	6
5	5	0.1656	24.1546	0.106884	12.0773	30.1932	18.1159	0.00205	2	5
5	5	0.2734	21.9459	0.0927213	18.2882	18.2882	21.9459	0.01515	5	5
5	5	0.11475	26.1438	0.0901961	52.2876	8.7146	8.7146	0.0246	6	1
5	5	0.12045	24.9066	0.105438	8.3022	24.9066	16.6044	0.0133	1	3
5	5	0.34045	20.561	0.192246	20.561	17.6237	8.81187	0.0542	7	6
5	5	0.17885	22.3651	0.0559128	22.3651	16.7738	22.3651	0.04325	4	3
5	5	0.16845	23.7459	0.0899377	11.873	17.8094	5.93648	0.11685	2	3
5	5	0.3222	15.5183	0.00946617	12.4146	18.622	18.622	0.0191	4	6
5	5	0.1037	28.9296	0.045323	19.2864	28.9296	9.6432	0.0027	2	3
5	5	0.1012	29.6443	0.127964	0	9.88142	9.88142	0.06655	0	1
5	5	0.1051	28.5442	0.0547098	9.51475	9.51475	19.0295	0.01445	1	1
5	5	0.17955	22.2779	0.102478	22.2779	16.7084	11.139	0.00805	4	3
5	5	0.10235	39.0816	0.135809	19.5408	9.7704	29.3112	0.0098	2	1
5	5	0.1037	28.9296	0.051109	38.5728	19.2864	28.9296	0.01655	4	2
5	5	0.16025	18.7207	0.0212168	12.4805	18.7207	18.7207	0.0922	2	3
5	5	0.26265	19.0367	0.0683419	22.8441	34.2661	19.0367	0.0635	6	9
5	5	0.2301	21.7297	0.0988701	30.4216	21.7297	17.3837	0.0944	7	5
5	5	0.2525	23.7624	0.151683	19.802	23.7624	11.8812	0.13045	5	6
5	5	0.3169	22.089	0.110603	25.2446	31.5557	18.9334	0.00885	8	10
5	5	0.53305	16.884	0.119032	16.884	18.76	28.1399	0.0091	9	10
5	5	0.32705	18.3458	0.0937166	24.4611	27.5187	12.2305	0.08425	8	9
5	5	0.3292	18.226	0.12986	39.4897	24.3013	18.226	0.00075	13	8
5	5	0.3582	19.5422	0.152848	16.7504	22.3339	22.3339	0.0269	6	8
5	5	0.34255	20.435	0.10378	8.75785	20.435	17.5157	0.0013	3	7
5	5	0.30095	19.9369	0.103339	29.9053	16.6141	9.96843	0.1092	9	5
5	5	0.34955	22.8866	0.135746	14.3041	14.3041	8.58246	0.01595	5	5
5	5	0.2868	20.9205	0.12622	6.9735	20.9205	24.4073	0.01455	2	6
5	5	0.22575	22.1484	0.0334441	17.7187	17.7187	17.7187	0.042	4	4
5	5	0.1045	28.7081	0.100478	38.2775	19.1388	0	0.1205	4	2
5	5	0.156	25.641	0.0522436	19.2308	19.2308	19.2308	0.0546	3	3
5	5	0.1739	23.0017	0.0580794	17.2513	23.0017	11.5009	0.01115	3	4
5	5	0.4309	13.9243	0.0675331	20.8865	23.2072	23.2072	0.08175	9	10
5	5	0.38685	12.9249	0.0529921	20.6799	20.6799	23.2648	0.0002	8	8
5	5	0.15825	25.2765	0.0625592	25.2765	0	25.2765	0.0406	4	0
5	5	0.2688	22.3214	0.159226	29.7619	11.1607	14.881	0.0313	8	3
5	5	0.2587	19.3274	0.0918052	19.3274	19.3274	19.3274	0.0943	5	5
5	5	0.2117	23.6183	0.125886	18.8947	14.171	14.171	0.1034	4	3
5	5	0.3296	24.2718	0.167324	15.1699	30.3398	18.2039	0.0175	5	10
5	5	0.28535	24.5313	0.11372	31.5402	21.0268	10.5134	0.11235	9	6
5	5	0.1221	24.57	0.110565	8.19001	16.38	32.76	0.01945	1	2
5	5	0.0983	30.5188	0.0503561	20.3459	20.3459	10.1729	0.0635	2	2
5	5	0.33715	20.7623	0.194424	32.6264	26.6943	20.7623	0.024	11	9
5	5	0.3362	11.8977	0.0392623	29.7442	17.8465	29.7442	0.00845	10	6
5	5	0.0942	31.8471	0.0801486	21.2314	0	53.0786	0.01585	2	0
5	5	0.18495	21.6275	0.0364964	21.6275	16.2206	16.2206	0.0093	4	3
5	5	0.2778	21.5983	0.12545	21.5983	28.7977	21.5983	0.00835	6	8
5	5	0.2813	21.3295	0.113047	24.8845	21.3295	14.2197	0.06965	7	6
5	5	0.1587	25.2048	0.141777	31.506	25.2048	31.506	0.0821	5	4
5	5	0.1039	28.8739	0.053898	28.8739	38.4986	9.62464	0.0254	3	4
5	5	0.1141	26.2927	0.086766	26.2927	35.057	35.057	0.0237	3	4
5	5	0.2993	13.3645	0.0459405	23.3879	23.3879	13.3645	0.0214	7	7
5	5	0.1598	25.0313	0.119212	18.7735	12.5156	25.0313	0.0307	3	2
5	5	0.22	22.7273	0.164091	31.8182	9.09091	22.7273	0.0871	7	2
5	5	0.17195	23.2626	0.23408	11.6313	23.2626	11.6313	0.02035	2	4
5	5	0.22285	22.4366	0.156159	17.9493	4.48732	26.9239	0.001	4	1
5	5	0.1295	23.166	0.011583	30.888	23.166	38.61	0.00505	4	3
5	5	0.34245	14.6007	0.0389838	23.3611	20.4409	14.6007	0.0409	8	7
5	5	0.16175	24.7295	0.0615147	18.5471	30.9119	24.7295	0.0189	3	5
5	5	0.115	26.087	0.0669565	26.087	34.7826	26.087	0.01615	3	4
5	5	0.29475	20.3562	0.128753	30.5344	16.9635	27.1416	0.00935	9	5
5	5	0.50765	17.7288	0.132572	19.6986	21.6685	13.789	0.0296	10	11
5	5	0.3997	20.015	0.127346	12.5094	20.015	20.015	0.0368	5	8
5	5	0.6749	16.2987	0.111646	20.7438	22.2255	16.2987	0.02655	14	15
5	5	0.28245	21.2427	0.0922287	10.6213	21.2427	28.3236	0.0686	3	6
5	5	0.32015	18.7412	0.116039	18.7412	12.4941	15.6177	0.04735	6	4
5	5	0.36325	22.0234	0.119339	19.2705	33.0351	13.7646	0.14975	7	12
5	5	0.7575	14.5215	0.0883828	22.4422	21.1221	14.5215	0.0243	17	16
5	5	0.46725	21.4018	0.094168	10.7009	19.2616	21.4018	0.05355	5	9
5	5	0.4334	23.0734	0.133133	18.4587	20.766	23.0734	0.00665	8	9
5	5	0.39655	20.174	0.146892	27.7393	12.6088	12.6088	0.1803	11	5
5	5	0.6942	17.2861	0.119346	14.4051	18.7266	18.7266	0.07875	10	13
5	5	0.2618	22.9183	0.0699007	30.5577	11.4591	22.9183	0.0078	8	3
5	5	0.29105	17.1792	0.0572067	13.7433	13.7433	17.1792	0.0079	4	4
5	5	0.2771	18.044	0.081559	14.4352	21.6528	25.2616	0.08855	4	6
5	5	0.27925	17.9051	0.0685765	21.4861	21.4861	21.4861	0.04415	6	6
5	5	0.16685	17.9802	0.0137848	17.9802	5.99341	11.9868	0.0305	3	1
5	5	0.36545	13.6818	0.0370776	13.6818	13.6818	8.20906	0.0607	5	5
5	5	0.24635	24.3556	0.134565	20.2963	16.2371	12.1778	0.09515	5	4
5	5	0.3772	18.5578	0.0831124	13.2556	21.2089	21.2089	0.0557	5	8
5	5	0.32235	18.6133	0.0697999	15.5111	12.4089	9.30665	0.0407	5	4
5	5	0.2345	21.322	0.0897655	21.322	8.52878	21.322	0.0455	5	2
5	5	0.22905	21.8293	0.114167	13.0976	21.8293	13.0976	0.08285	3	5
5	5	0.2225	22.4719	0.101348	22.4719	4.49438	17.9775	0.03945	5	1
5	5	0.3655	10.9439	0.0767442	10.9439	32.8317	24.6238	0.0315	4	12
5	5	0.6627	16.5988	0.128791	25.6526	27.1616	21.1257	0.007	17	18
5	5	0.41665	19.2008	0.101884	26.4011	14.4006	12.0005	0.0776	11	6
5	5	0.2949	16.9549	0.140895	16.9549	13.5639	6.78196	0.00875	5	4
5	5	0.29925	20.0501	0.139181	10.0251	23.3918	20.0501	0.0398	3	7
5	5	0.2999	23.3411	0.137212	20.0067	26.6756	23.3411	0.003	6	8
5	5	0.29425	20.3908	0.0630416	30.5862	16.9924	20.3908	0.0184	9	5
5	5	0.16635	24.0457	0.0282537	18.0343	24.0457	18.0343	0.0341	3	4
5	5	0.28615	20.968	0.116198	31.452	20.968	31.452	0.0139	9	6
5	5	0.20745	24.1022	0.0711015	4.82044	33.7431	24.1022	0.00075	1	7
5	5	0.2296	21.777	0.108667	26.1324	30.4878	21.777	0.00995	6	7
5	5	0.36725	21.7835	0.0758339	21.7835	27.2294	21.7835	0.13695	8	10
5	5	0.1269	23.6407	0.0760441	0	15.7604	31.5209	0.01215	0	2
5	5	0.1017	29.4985	0.123402	9.83284	19.6657	29.4985	0.05545	1	2
5	5	0.34975	20.0143	0.0730522	20.0143	11.4367	11.4367	0.1971	7	4
5	5	0.18865	26.5041	0.0991254	15.9025	15.9025	15.9025	0.01835	3	3
5	5	0.264	22.7273	0.145455	15.1515	15.1515	30.303	0.02	4	4
5	5	0.1648	30.3398	0.17415	24.2718	24.2718	6.06796	0.09575	4	4
5	5	0.1179	25.4453	0.0839695	8.48176	42.4088	16.9635	0.0494	1	5
5	5	0.49425	16.1861	0.0990389	16.1861	26.3025	8.09307	0.0786	8	13
5	5	0.19515	20.4971	0.0363823	15.3728	20.4971	20.4971	0.0136	3	4
5	5	0.15945	25.0862	0.0771402	6.27156	25.0862	31.3578	0.0307	1	4
5	5	0.1571	25.4615	0.0951623	19.0961	6.36537	12.7307	0.052	3	1
5	5	0.0684	43.8596	0.0935673	14.6199	43.8596	29.2398	0.0095	1	3
5	5	0.2153	23.2234	0.0601486	27.8681	9.28936	18.5787	0.04005	6	2
5	5	0.16985	23.5502	0.100677	23.5502	5.88755	11.7751	0.08125	4	1
5	5	0.48565	22.6501	0.119428	16.4728	24.7092	14.4137	0.11535	8	12
5	5	0.26935	22.2758	0.0662707	18.5632	22.2758	22.2758	0.05775	5	6
5	5	0.1665	18.018	0.0282282	36.036	18.018	36.036	0.0183	6	3
5	5	0.2143	23.3318	0.0475968	27.9981	13.9991	18.6654	0.02065	6	3
5	5	0.2864	20.9497	0.060405	24.4413	20.9497	20.9497	0.0482	7	6
5	5	0.1079	27.8035	0.107044	18.5357	55.607	27.8035	0.035	2	6
5	5	0.1098	27.3224	0.079235	36.4299	27.3224	18.2149	0.0492	4	3
5	5	0.10285	29.1687	0.0481283	29.1687	38.8916	19.4458	0.0675	3	4
5	5	0.10805	27.7649	0.0596946	55.5298	27.7649	9.25497	0.06905	6	3
5	5	0.26435	15.1315	0.0508795	26.48	18.9143	26.48	0.00405	7	5
5	5	0.11145	26.9179	0.0686406	8.97263	26.9179	44.8632	0.01295	1	3
5	5	0.1049	28.5987	0.124881	19.0658	28.5987	38.1316	0.024	2	3
5	5	0.18695	21.3961	0.0885263	42.7922	32.0941	32.0941	0.02285	8	6
5	5	0.2658	18.8111	0.20015	48.909	26.3356	26.3356	0.0249	13	7
5	5	0.58005	13.7919	0.0953366	29.3078	31.0318	24.1359	0.00995	17	18
5	5	0.2955	20.3046	0.121658	23.6887	16.9205	20.3046	0.0496	7	5
5	5	0.271	22.1402	0.100185	18.4502	14.7601	11.0701	0.0038	5	4
5	5	0.45575	21.9419	0.119473	15.3593	19.7477	6.58256	0.1067	7	9
5	5	0.42565	21.1441	0.116998	7.04804	16.4454	23.4935	0.008	3	7
5	5	0.4009	17.4607	0.0688451	22.4495	14.9663	22.4495	0.00035	9	6
5	5	0.17535	22.8115	0.103222	39.9202	17.1086	28.5144	0.00345	7	3
5	5	0.33875	14.7601	0.0708487	5.90406	20.6642	41.3284	0.03895	2	7
5	5	0.4022	19.8906	0.137121	29.8359	24.8633	27.3496	0.0107	12	10
5	5	0.2806	21.3828	0.147719	17.819	21.3828	17.819	0.1088	5	6
5	5	0.18115	22.0811	0.0264974	22.0811	22.0811	22.0811	0.0561	4	4
5	5	0.32055	24.9571	0.0664483	12.4786	24.9571	18.7178	0.03275	4	8
5	5	0.48495	18.5586	0.0888751	18.5586	20.6207	24.7448	0.0521	9	10
5	5	0.39935	20.0326	0.130212	27.5448	17.5285	22.5366	0.03225	11	7
5	5	0.2168	23.0627	0.164899	27.6753	18.4502	23.0627	0.01965	6	4
5	5	0.5783	19.0213	0.141017	25.9381	22.4797	22.4797	0.04985	15	13
5	5	0.23315	21.4454	0.0765602	25.7345	8.57817	25.7345	0.01735	6	2
5	5	0.28655	20.9388	0.111499	27.9183	20.9388	13.9592	0.02365	8	6
5	5	0.56335	15.9759	0.055028	17.751	21.3011	21.3011	0.06785	10	12
5	5	0.16335	30.6091	0.0994796	24.4873	18.3655	24.4873	0.03305	4	3
5	5	0.2698	22.2387	0.0997035	25.9451	14.8258	22.2387	0.02095	7	4
5	5	0.21795	22.941	0.0649231	18.3528	41.2939	27.5292	0.0084	4	9
5	5	0.57655	19.079	0.103287	32.9546	22.5479	22.5479	0.0286	19	13
5	5	0.3574	19.5859	0.0879966	19.5859	19.5859	19.5859	0.0568	7	7
5	5	0.16595	24.1036	0.105152	24.1036	36.1555	30.1296	0.02515	4	6
5	5	0.4451	20.2202	0.113682	22.4669	29.2069	20.2202	0.0028	10	13
5	5	0.22325	22.3964	0.0530795	26.8757	26.8757	31.355	0.0206	6	6
5	5	0.42335	23.6211	0.180702	33.0696	28.3453	23.6211	0.00625	14	12
5	5	0.3068	22.8162	0.129889	26.0756	35.854	29.3351	0.0145	8	11
5	5	0.5266	18.9897	0.131029	28.4846	22.7877	22.7877	0.0073	15	12
5	5	0.27425	21.8778	0.130902	25.5242	29.1705	14.5852	0.09795	7	8
5	5	0.2869	20.9132	0.13855	27.8843	27.8843	27.8843	0.00745	8	8
5	5	0.2979	23.4978	0.098523	20.141	20.141	30.2115	0.01205	6	6
5	5	0.24115	20.734	0.115696	20.734	33.1744	29.0276	0.00875	5	8
5	5	0.27785	17.9953	0.107972	14.3963	10.7972	21.5944	0.0114	4	3
5	5	0.405	14.8148	0.10284	19.7531	19.7531	17.284	0.09565	8	8
5	5	0.31775	15.7356	0.0305271	18.8828	28.3242	34.6184	0.07825	6	9
5	5	0.2489	24.1061	0.0803536	44.1945	24.1061	20.0884	0.09045	11	6
5	5	0.3551	22.5289	0.102366	14.0805	16.8966	8.44832	0.08085	5	6
5	5	0.28965	13.8098	0.0291731	6.90489	13.8098	27.6195	0.0215	2	4
5	5	0.1131	26.5252	0.0778073	17.6835	35.3669	0	0.1174	2	4
5	5	0.11025	27.2109	0.0825397	27.2109	27.2109	18.1406	0.0441	3	3
5	5	0.11735	25.5646	0.117597	25.5646	17.043	25.5646	0.0347	3	2
5	5	0.24955	24.0433	0.103386	16.0289	40.0721	24.0433	0.02975	4	10
5	5	0.2964	20.2429	0.0610661	30.3644	13.4953	23.6167	0.01245	9	4
5	5	0.11425	35.0109	0.0809628	8.75274	17.5055	26.2582	0.0668	1	2
5	5	0.40865	14.6825	0.109752	19.5767	29.365	24.4708	0.0473	8	12
5	5	0.269	18.5874	0.0799257	26.0223	18.5874	22.3048	0.00215	7	5
5	5	0.3967	20.1664	0.11873	27.7288	25.208	20.1664	0.0049	11	10
5	5	0.20955	23.8607	0.115008	38.177	28.6328	28.6328	0.01265	8	6
5	5	0.28435	21.1008	0.102866	21.1008	31.6511	17.584	0.08765	6	9
5	5	0.12325	24.3408	0.0421907	24.3408	40.568	0	0.12755	3	5
5	5	0.15315	26.1182	0.106758	26.1182	19.5886	13.0591	0.0175	4	3
5	5	0.33005	18.1791	0.103015	27.2686	27.2686	27.2686	0.001	9	9
5	5	0.15505	25.7981	0.109642	32.2477	25.7981	19.3486	0.0007	5	4
5	5	0.31555	15.8453	0.0451592	25.3526	28.5216	34.8598	0.0076	8	9
5	5	0.2611	19.1498	0.0760245	22.9797	30.6396	38.2995	0.00655	6	8
5	5	0.28965	13.8098	0.0341792	34.5244	24.1671	24.1671	0.0121	10	7
5	5	0.1674	23.8949	0.0501792	23.8949	35.8423	17.9211	0.0106	4	6
5	5	0.113	26.5487	0.0455752	35.3982	44.2478	17.6991	0.0334	4	5
5	5	0.11185	35.7622	0.0500671	0	26.8216	17.8811	0.02475	0	3
5	5	0.155	25.8065	0.0441935	38.7097	19.3548	25.8065	0.0408	6	3
5	5	0.11385	26.3505	0.10628	52.7009	26.3505	35.1339	0.03725	6	3
5	5	0.1525	26.2295	0.225574	19.6721	39.3443	19.6721	0.00425	3	6
5	5	0.1683	23.7671	0.247475	17.8253	17.8253	29.7089	0.00895	3	3
5	5	0.14715	27.1831	0.155624	40.7747	47.5705	33.9789	0.1178	6	7
5	5	0.2299	21.7486	0.151805	21.7486	13.0492	34.7977	0.0127	5	3
5	5	0.10415	28.8046	0.150264	19.2031	48.0077	9.60154	0.07175	2	5
5	5	0.15825	25.2765	0.0246445	31.5956	31.5956	12.6382	0.0379	5	5
5	5	0.17645	28.3366	0.0731085	28.3366	28.3366	5.66733	0.0083	5	5
5	5	0.18445	21.6861	0.106804	21.6861	5.42152	16.2646	0.02925	4	1
5	5	0.1186	25.2951	0.0484823	33.7268	16.8634	42.1585	0.0369	4	2
5	5	0.3478	23.0017	0.145917	23.0017	17.2513	17.2513	0.0687	8	6
5	5	0.11985	25.0313	0.104297	16.6875	16.6875	16.6875	0.03685	2	2
5	5	0.68435	11.6899	0.0397457	20.4574	23.3798	24.8411	0.0166	14	16
5	5	0.4434	11.2765	0.0385656	20.2977	31.5742	27.0636	0.0404	9	14
5	5	0.306	16.3399	0.102778	22.8758	26.1438	16.3399	0.0006	7	8
5	5	0.2293	21.8055	0.0937636	34.8888	30.5277	30.5277	0.04015	8	7
5	5	0.179	22.3464	0.143855	16.7598	27.933	22.3464	0.06085	3	5
5	5	0.2449	24.4998	0.127399	20.4165	8.1666	24.4998	0.03815	5	2
5	5	0.204	19.6078	0.0666667	9.80392	9.80392	19.6078	0.05875	2	2
5	5	0.13155	22.805	0.115165	15.2033	22.805	30.4067	0.03985	2	3
5	5	0.30865	19.4395	0.0970355	22.6794	22.6794	19.4395	0.0963	7	7
5	5	0.18795	21.2823	0.0718276	21.2823	26.6028	26.6028	0.01735	4	5
5	5	0.2339	25.652	0.0722531	25.652	29.9273	29.9273	0.0002	6	7
5	5	0.23865	20.9512	0.0611775	37.7121	20.9512	12.5707	0.03305	9	5
5	5	0.23885	20.9336	0.232363	12.5602	25.1204	12.5602	0.0383	3	6
5	5	0.21205	28.2952	0.051403	28.2952	9.43174	18.8635	0.00695	6	2
5	5	0.39565	22.7474	0.169215	12.6374	27.8024	20.2199	0.00525	5	11
5	5	0.22475	22.2469	0.0743048	22.2469	40.0445	22.2469	0.0621	5	9
5	5	0.1095	27.3973	0.147489	27.3973	18.2648	27.3973	0.02975	3	2
5	5	0.2126	23.5183	0.104657	14.111	18.8147	23.5183	0.00645	3	4
5	5	0.16345	18.3542	0.0140716	18.3542	36.7085	18.3542	0.00095	3	6
5	5	0.3028	13.21	0.0285667	19.8151	23.1176	23.1176	0.0716	6	7
5	5	0.1618	24.7219	0.026885	37.0828	30.9023	30.9023	0.0095	6	5
5	5	0.275	21.8182	0.100364	32.7273	29.0909	21.8182	0.0301	9	8
5	5	0.4382	18.2565	0.100525	22.8206	25.1027	22.8206	0.02075	10	11
5	5	0.3336	23.9808	0.161271	23.9808	26.9784	26.9784	0.035	8	9
5	5	0.2964	20.2429	0.181174	23.6167	20.2429	26.9906	0.03405	7	6
5	5	0.3187	21.9642	0.15422	18.8265	15.6887	18.8265	0.00055	6	5
5	5	0.1435	27.8746	0.0108014	13.9373	34.8432	20.9059	0.097	2	5
5	5	0.23295	21.4638	0.110539	12.8783	21.4638	30.0494	0.02375	3	5
5	5	0.64735	15.4476	0.117556	18.5371	21.6266	32.4399	0.0148	12	14
5	5	0.39355	20.3278	0.106086	38.1146	25.4097	20.3278	0.0737	15	10
5	5	0.21355	23.4137	0.0697729	42.1447	32.7792	18.731	0.02785	9	7
5	5	0.17655	22.6565	0.0951572	16.9924	5.66412	22.6565	0.00165	3	1
5	5	0.18845	15.9193	0.0130008	26.5322	21.2258	21.2258	0.0253	5	4
5	5	0.31175	19.2462	0.143865	25.6616	12.8308	12.8308	0.0196	8	4
5	5	0.3073	13.0166	0.0214774	13.0166	26.0332	19.5249	0.02085	4	8
5	5	0.3449	17.3963	0.0771238	17.3963	23.1951	26.0945	0.0592	6	8
5	5	0.36755	13.6036	0.0733234	29.9279	24.4865	13.6036	0.0574	11	9
5	5	0.26625	22.5352	0.208451	15.0235	37.5587	18.7793	0.0079	4	10
5	5	0.50365	17.8696	0.124789	25.8116	21.8406	19.8551	0.06665	13	11
5	5	0.29925	20.0501	0.10259	20.0501	16.7084	23.3918	0.07145	6	5
5	5	0.10655	28.1558	0.15908	0	9.38527	28.1558	0.01145	0	1
5	5	0.4538	15.4253	0.0491406	30.8506	24.2398	33.0542	0.00335	14	11
5	5	0.17175	23.2897	0.0608443	29.1121	23.2897	23.2897	0.05825	5	4
5	5	0.1017	29.4985	0.0821042	9.83284	39.3314	29.4985	0.0076	1	4
5	5	0.20735	24.1138	0.112129	33.7593	28.9366	24.1138	0.00775	7	6
5	5	0.2387	25.1362	0.0890239	12.5681	37.7042	16.7574	0.0243	3	9
5	5	0.1587	25.2048	0.142407	18.9036	12.6024	12.6024	0.0153	3	2
5	5	0.22195	22.5276	0.16738	4.50552	27.0331	22.5276	0.0704	1	6
5	5	0.4168	14.3954	0.0394674	16.7946	23.9923	9.59693	0.129	7	10
5	5	0.1596	31.3283	0.109023	12.5313	43.8596	18.797	0.1164	2	7
5	5	0.0997	30.0903	0.0942828	10.0301	30.0903	20.0602	0.013	1	3
5	5	0.10535	28.4765	0.081158	28.4765	0	18.9843	0.0038	3	0
5	5	0.31415	15.916	0.0526818	22.2823	22.2823	9.54958	0.11495	7	7
5	5	0.19415	15.452	0.0100438	10.3013	10.3013	0	0.26445	2	2
5	5	0.1054	28.463	0.0322581	18.9753	18.9753	18.9753	0.02495	2	2
5	5	0.31485	19.0567	0.148325	22.2328	19.0567	28.585	0.00085	7	6
5	5	0.2801	21.4209	0.133345	21.4209	14.2806	21.4209	0.0015	6	4
5	5	0.22145	22.5785	0.0903138	27.0942	27.0942	18.0628	0.1003	6	6
5	5	0.15365	26.0332	0.0423039	26.0332	13.0166	13.0166	0.00555	4	2
5	5	0.2124	14.1243	0.0480226	23.5405	28.2486	28.2486	0.03255	5	6
5	5	0.1669	23.9664	0.0674056	23.9664	29.9581	5.99161	0.075	4	5
5	5	0.22265	22.4568	0.0496295	35.9308	31.4395	17.9654	0.1163	8	7
5	5	0.1164	25.7732	0.0957904	8.59107	25.7732	34.3643	0.00335	1	3
5	5	0.0944	31.7797	0.0561441	42.3729	10.5932	42.3729	0.0351	4	1
5	5	0.1	30	0.103	30	10	30	0.02365	3	1
5	5	0.2357	12.728	0.0188799	12.728	33.9415	21.2134	0.00075	3	8
5	5	0.23545	21.2359	0.186027	12.7416	29.7303	12.7416	0.0243	3	7
5	5	0.3167	25.2605	0.119672	18.9454	28.4181	18.9454	0.08295	6	9
5	5	0.21635	23.1107	0.0767275	18.4886	27.7328	23.1107	0.0527	4	6
5	5	0.21865	27.4411	0.118225	27.4411	22.8676	22.8676	0.08895	6	5
5	5	0.20835	19.1985	0.112311	28.7977	19.1985	4.79962	0.1253	6	4
5	5	0.117	34.188	0.143162	8.54701	59.8291	8.54701	0.05715	1	7
5	5	0.16585	24.1182	0.12451	24.1182	12.0591	24.1182	0.01035	4	2
5	5	0.30795	16.2364	0.0449748	19.4837	25.9782	22.731	-5e-05	6	8
5	5	0.2118	23.6072	0.107413	28.3286	33.05	23.6072	0.008	6	7
5	5	0.1534	26.0756	0.0511734	19.5567	13.0378	13.0378	0.0515	3	2
5	5	0.14835	26.9633	0.185709	40.4449	40.4449	33.7041	0.0016	6	6
5	5	0.17285	17.3561	0.08302	46.2829	28.9268	28.9268	0.00845	8	5
5	5	0.14315	20.957	0.00523926	27.9427	13.9714	27.9427	0.0365	4	2
5	5	0.2115	23.6407	0.145626	14.1844	23.6407	14.1844	0.05835	3	5
5	5	0.15195	26.3244	0.0612043	19.7433	26.3244	19.7433	0.00785	3	4
5	5	0.59975	13.3389	0.0791163	18.341	18.341	23.3431	0.0573	11	11
5	5	0.3657	19.1414	0.0943396	24.6103	19.1414	27.3448	0.0291	9	7
5	5	0.47675	14.6827	0.107708	23.0729	12.5852	16.7803	0.0212	11	6
5	5	0.39005	28.2015	0.186258	17.9464	20.5102	17.9464	0.03945	7	8
5	5	0.2203	27.2356	0.203586	27.2356	27.2356	18.1571	0.0169	6	6
5	5	0.3485	25.825	0.17604	20.0861	20.0861	25.825	0.0404	7	7
5	5	0.2069	28.9995	0.0688739	19.333	9.66651	14.4998	0.00215	4	2
5	5	0.21425	28.0047	0.171062	18.6698	32.6721	32.6721	0.0476	4	7
5	5	0.33285	15.0218	0.072405	18.0261	21.0305	18.0261	0.05655	6	7
5	5	0.23105	21.6403	0.114694	21.6403	25.9684	12.9842	0.05835	5	6
5	5	0.16615	24.0746	0.0565754	12.0373	6.01866	24.0746	0.0478	2	1
5	5	0.33075	21.164	0.158881	15.1172	21.164	27.2109	0.00285	5	7
5	5	0.29825	20.1174	0.0734283	23.4702	40.2347	30.176	0.024	7	12
5	5	0.24655	24.3358	0.140945	16.2239	12.1679	12.1679	0.006	4	3
5	5	0.3912	17.8937	0.123466	23.0061	15.3374	28.1186	0.00355	9	6
5	5	0.4692	14.919	0.0773657	23.4442	23.4442	27.7067	0.0177	11	11
5	5	0.1305	22.9885	0.0793103	22.9885	38.3142	7.66284	0.0325	3	5
5	5	0.169	23.6686	0.108876	17.7515	17.7515	29.5858	0.0205	3	3
5	5	0.1439	27.7971	0.0371786	27.7971	13.8985	6.94927	0.0144	4	2
5	5	0.24535	24.4549	0.136743	28.5307	16.3032	20.3791	0.05275	7	4
5	5	0.28355	21.1603	0.124493	17.6336	38.7939	7.05343	0.1936	5	11
5	5	0.38465	20.7981	0.134278	18.1984	20.7981	15.5986	0.0006	7	8
5	5	0.83405	16.7856	0.110485	19.1835	21.5814	19.1835	0.00835	16	18
5	5	0.2971	20.1952	0.187311	20.1952	26.927	16.8294	0.0601	6	8
5	5	0.292	20.5479	0.184247	27.3973	23.9726	20.5479	0.0077	8	7
5	5	0.23775	25.2366	0.13102	33.6488	29.4427	12.6183	0.1093	8	7
5	5	0.23035	21.7061	0.170393	30.3885	26.0473	30.3885	0.02415	7	6
5	5	0.272	22.0588	0.175	25.7353	33.0882	29.4118	0.02075	7	9
5	5	0.3502	17.1331	0.124786	31.4106	14.2776	11.422	0.06925	11	5
5	5	0.10415	28.8046	0.0547288	38.4061	28.8046	0	0.1367	4	3
5	5	0.1011	29.6736	0.0534125	29.6736	19.7824	49.456	0.0117	3	2
5	5	0.09775	30.6905	0.121739	20.4604	10.2302	61.3811	0.0023	2	1
5	5	0.3793	18.455	0.133667	18.455	10.5457	23.7279	0.0653	7	4
5	5	0.11385	26.3505	0.108476	8.78349	26.3505	35.1339	0.00395	1	3
5	5	0.1875	16	0.0805333	21.3333	21.3333	10.6667	0.0759	4	4
5	5	0.1004	29.8805	0.106076	19.9203	19.9203	9.96016	0.0488	2	2
5	5	0.3588	13.9353	0.0487737	11.1483	16.7224	27.8707	0.0123	4	6
5	5	0.29565	13.5295	0.0840521	20.2943	16.9119	20.2943	0.04685	6	5
5	5	0.36485	19.186	0.0815404	21.9268	24.6677	13.7043	0.04885	8	9
5	5	0.1507	26.5428	0.142336	13.2714	26.5428	6.6357	0.00955	2	4
5	5	0.3652	16.4294	0.115005	24.644	21.9058	16.4294	0.0447	9	8
5	5	0.25935	23.1348	0.0867553	11.5674	19.279	19.279	0.0555	3	5
5	5	0.29215	20.5374	0.0607565	13.6916	20.5374	17.1145	0.1476	4	6
5	5	0.1907	26.2192	0.0964866	15.7315	15.7315	10.4877	0.07995	3	3
5	5	0.2166	23.084	0.120729	13.8504	18.4672	23.084	0.01455	3	4
5	5	0.0957	41.7973	0.132706	20.8986	20.8986	41.7973	0.00635	2	2
5	5	0.66055	15.1389	0.137234	21.1945	22.7083	22.7083	0.04165	14	15
5	5	0.1118	26.8336	0.0339893	17.8891	35.7782	8.94454	0.104	2	4
5	5	0.08455	35.482	0.0212892	0	23.6546	23.6546	0.01195	0	2
5	5	0.2318	21.5703	0.181838	17.2563	8.62813	17.2563	0.0855	4	2
5	5	0.192	26.0417	0.235156	26.0417	20.8333	20.8333	0.03105	5	4
5	5	0.298	16.7785	0.0921141	30.2013	10.0671	16.7785	0.10215	9	3
5	5	0.28785	20.8442	0.138614	20.8442	13.8961	20.8442	0.0043	6	4
5	5	0.16105	24.837	0.0720273	18.6278	12.4185	37.2555	0.0072	3	2
5	5	0.1539	25.9909	0.207927	19.4932	19.4932	12.9955	0.05195	3	3
5	5	0.11925	25.1572	0.0243187	25.1572	33.543	25.1572	0.0166	3	4
5	5	0.17615	17.0309	0.043145	17.0309	28.3849	17.0309	0.05685	3	5
5	5	0.0929	32.2928	0.146932	10.7643	0	10.7643	0.01835	1	0
5	5	0.29995	13.3356	0.0641774	16.6694	23.3372	26.6711	0.00805	5	7
5	5	0.23305	17.1637	0.0478438	12.8728	17.1637	21.4546	0.0027	3	4
5	5	0.16995	17.6523	0.0550162	23.5363	35.3045	23.5363	0.00885	4	6
5	5	0.12425	24.1449	0.049497	24.1449	16.0966	32.1932	0.0443	3	2
5	5	0.2087	19.1663	0.0836128	19.1663	14.3747	19.1663	0.02365	4	3
5	5	0.10045	29.8656	0.15779	0	29.8656	9.9552	0.0652	0	3
5	5	0.06865	43.6999	0.0415149	14.5666	43.6999	29.1333	0.0039	1	3
5	5	0.23485	21.2902	0.10709	34.0643	38.3223	34.0643	0.0939	8	9
5	5	0.2304	21.7014	0.169054	17.3611	17.3611	34.7222	0.0039	4	4
5	5	0.31945	21.9127	0.133354	28.1734	31.3038	18.7823	0.01595	9	10
5	5	0.28705	17.4186	0.0297858	17.4186	27.8697	34.8371	0.0414	5	8
5	5	0.39885	17.5505	0.0857465	12.536	32.5937	22.5649	0.0036	5	13
5	5	0.16255	24.6078	0.0784374	18.4559	18.4559	18.4559	0.02535	3	3
5	5	0.2403	20.8073	0.132543	8.32293	41.6146	20.8073	0.0655	2	10
5	5	0.1042	28.7908	0.162668	19.1939	28.7908	19.1939	0.0012	2	3
5	5	0.2908	13.7552	0.0316369	13.7552	24.0715	30.9491	0.0304	4	7
5	5	0.306	22.8758	0.131046	16.3399	26.1438	26.1438	0.0417	5	8
5	5	0.393	10.1781	0.033715	33.0789	17.8117	25.4453	0.0326	13	7
5	5	0.5067	15.7884	0.103809	21.7091	19.7355	33.5504	0.0191	11	10
5	5	0.3025	16.5289	0.104298	42.9752	26.4463	19.8347	0.0232	13	8
5	5	0.13345	29.9738	0.10828	14.9869	22.4803	14.9869	0.01305	2	3
5	5	0.1498	26.7023	0.0640854	0	26.7023	13.3511	0.03385	0	4
5	5	0.2585	19.3424	0.0359768	23.2108	30.9478	23.2108	0.02255	6	8
5	5	0.16355	24.4574	0.0773464	18.343	30.5717	18.343	0.03185	3	5
5	5	0.14795	27.0362	0.0963163	27.0362	13.5181	20.2771	0.0165	4	2
5	5	0.09945	30.1659	0.0744093	30.1659	30.1659	30.1659	0.02335	3	3
5	5	0.2078	24.0616	0.0972089	14.437	24.0616	38.4986	0.028	3	5
5	5	0.50635	15.7993	0.130345	25.6739	41.4733	27.6489	0.01625	13	21
5	5	0.23505	21.2721	0.103382	17.0177	29.7809	29.7809	0.0577	4	7
5	5	0.2461	20.3169	0.151361	16.2536	28.4437	28.4437	0.0466	4	7
5	5	0.23595	21.1909	0.0909091	25.4291	21.1909	16.9527	0.096	6	5
5	5	0.33475	20.9111	0.208215	20.9111	14.9365	26.8857	0.00145	7	5
5	5	0.3263	15.3233	0.0272755	21.4527	18.388	27.582	0.058	7	6
5	5	0.19215	20.8171	0.0447567	20.8171	15.6128	15.6128	0.03185	4	3
5	5	0.40945	17.0961	0.0802296	21.9807	19.5384	21.9807	0.0229	9	8
5	5	0.1553	19.3175	0.0701867	32.1958	25.7566	32.1958	0.07135	5	4
5	5	0.1021	29.383	0.13761	39.1773	19.5886	19.5886	0.0632	4	2
5	5	0.3869	18.0925	0.0739209	33.6004	25.8465	23.2618	0.07015	13	10
5	5	0.20795	24.0442	0.218803	19.2354	14.4265	14.4265	0.10345	4	3
5	5	0.16035	24.9454	0.0726536	18.7091	24.9454	24.9454	0.04515	3	4
5	5	0.3316	18.0941	0.13073	15.0784	24.1255	21.1098	0.0399	5	8
5	5	0.2809	14.2399	0.0587398	21.3599	10.68	21.3599	0.07995	6	3
5	5	0.2826	21.2314	0.128804	31.8471	17.6929	10.6157	0.03235	9	5
5	5	0.2878	20.8478	0.145066	24.3224	13.8985	20.8478	0.05775	7	4
5	5	0.1596	25.0627	0.123747	12.5313	31.3283	31.3283	0.06075	2	5
5	5	0.36165	22.1208	0.122771	16.5906	30.4161	13.8255	0.0797	6	11
5	5	0.22535	26.6252	0.154205	8.87508	13.3126	4.43754	0.0404	2	3
5	5	0.1389	21.5983	0.0367171	14.3988	14.3988	14.3988	0.0988	2	2
5	5	0.2694	25.9837	0.0855605	22.2717	22.2717	29.6956	0.0062	6	6
5	5	0.17105	23.385	0.111663	11.6925	40.9237	5.84624	0.069	2	7
5	5	0.1701	29.3945	0.0999412	35.2734	29.3945	11.7578	0.01615	6	5
5	5	0.45785	17.473	0.0770995	21.8412	15.2889	24.0253	0.0849	10	7
5	5	0.31595	9.49517	0.00205729	28.4855	18.9903	25.3205	0.04465	9	6
5	5	0.1218	24.6305	0.10468	16.4204	16.4204	24.6305	0.0051	2	2
5	5	0.21425	23.3372	0.162194	14.0023	14.0023	32.6721	0.0001	3	3
5	5	0.2873	20.8841	0.144796	17.4034	6.96136	24.3648	0.036	5	2
5	5	0.26135	15.3051	0.0774823	22.9577	7.65257	7.65257	0.04705	6	2
5	5	0.3736	13.3833	0.0364026	16.06	16.06	24.0899	0.0218	6	6
5	5	0.0987	30.3951	0.0886525	40.5268	30.3951	10.1317	0.00385	4	3
5	5	0.11005	27.2603	0.100409	27.2603	18.1736	18.1736	0.0519	3	2
5	5	0.1658	24.1255	0.0805187	36.1882	18.0941	18.0941	0.0042	6	3
5	5	0.14575	27.4443	0.152316	34.3053	13.7221	13.7221	0.0757	5	2
5	5	0.16045	18.6974	0.04799	31.1624	18.6974	12.4649	0.07305	5	3
5	5	0.1745	22.9226	0.106017	40.1146	11.4613	17.192	0.1485	7	2
5	5	0.0831	36.1011	0.00481348	12.0337	0	24.0674	0.01825	1	0
5	5	0.1583	25.2685	0.0660139	18.9514	18.9514	18.9514	0.0034	3	3
5	5	0.22215	18.0059	0.0695476	18.0059	27.0088	9.00293	0.1511	4	6
5	5	0.15915	31.4169	0.103676	31.4169	18.8501	37.7003	0.02705	5	3
5	5	0.16875	23.7037	0.127407	17.7778	11.8519	47.4074	5e-05	3	2
5	5	0.24745	20.2061	0.156799	24.2473	24.2473	12.1237	0.03975	6	6
5	5	0.38705	18.0855	0.122723	18.0855	15.5019	25.8365	0.02785	7	6
5	5	0.2926	20.5058	0.13961	27.3411	20.5058	13.6705	0.115	8	6
5	5	0.3081	25.9656	0.141999	12.9828	29.2113	12.9828	0.1176	4	9
5	5	0.17955	22.2779	0.134781	22.2779	16.7084	16.7084	0.0416	4	3
5	5	0.26525	22.6202	0.113101	26.3902	15.0801	22.6202	0.0296	7	4
5	5	0.23655	21.1372	0.168463	16.9097	16.9097	25.3646	0.01845	4	4
5	5	0.14685	27.2387	0.102486	13.6193	13.6193	20.429	0.0877	2	2
5	5	0.21235	23.546	0.229103	14.1276	18.8368	28.2552	0.0047	3	4
5	5	0.29245	20.5163	0.117969	20.5163	13.6776	17.0969	0.00575	6	4
5	5	0.5769	17.334	0.0821633	15.6006	17.334	20.8008	0.09955	9	10
5	5	0.38645	18.1136	0.13417	20.7013	20.7013	23.2889	0.0311	8	8
5	5	0.1029	38.8727	0.139456	48.5909	9.71817	38.8727	0.0098	5	1
5	5	0.4498	15.5625	0.0877056	13.3393	13.3393	22.2321	0.0396	6	6
5	5	0.23445	21.3265	0.0801877	21.3265	25.5918	34.1224	0.0224	5	6
5	5	0.21975	27.3038	0.141297	36.405	18.2025	13.6519	0.05985	8	4
5	5	0.09665	41.3864	0.187274	20.6932	10.3466	31.0398	0.0108	2	1
5	5	0.1164	25.7732	0.0283505	17.1821	17.1821	42.9553	0.0044	2	2
5	5	0.45435	19.8085	0.121492	26.4114	17.6076	28.6123	0.0181	12	8
5	5	0.21545	32.4901	0.167788	27.8487	13.9243	13.9243	0.01065	6	3
5	5	0.54725	16.4459	0.108908	29.2371	12.7912	23.7551	0.08225	16	7
5	5	0.286	24.4755	0.234091	24.4755	6.99301	17.4825	0.0672	7	2
5	5	0.57315	13.958	0.0889819	19.1922	20.9369	19.1922	0.04015	11	12
5	5	0.47275	16.9223	0.113802	23.2681	19.0375	21.1528	0.0757	11	9
5	5	0.1727	23.1616	0.128836	40.5327	11.5808	23.1616	0.0472	7	2
5	5	0.1495	26.7559	0.0759197	33.4448	26.7559	13.3779	0.06635	5	4
5	5	0.4065	14.7601	0.0915129	27.0603	14.7601	22.1402	0.10755	11	6
5	5	0.18595	21.5112	0.048669	26.8889	21.5112	26.8889	0.02325	5	4
5	5	0.309	9.70874	0.0205502	22.6537	29.1262	29.1262	0.0803	7	9
5	5	0.33175	21.1002	0.105049	30.1432	30.1432	24.1145	0.0498	10	10
5	5	0.22865	26.241	0.0736934	21.8675	17.494	8.74699	0.06475	5	4
5	5	0.4313	16.23	0.0994667	23.1857	11.5929	20.8671	0.0362	10	5
5	5	0.21675	23.0681	0.0768166	23.0681	13.8408	9.22722	0.0584	5	3
5	5	0.1998	20.02	0.0703203	20.02	20.02	15.015	0.01455	4	4
5	5	0.11875	25.2632	0.0501053	16.8421	8.42105	0	0.15775	2	1
5	5	0.4133	14.5173	0.136826	16.9368	24.1955	19.3564	0.05145	7	10
5	5	0.305	22.9508	0.127213	16.3934	29.5082	22.9508	0.00775	5	9
5	5	0.33515	20.8862	0.0993585	20.8862	26.8536	17.9024	0.03615	7	9
5	5	0.33505	20.8924	0.111327	17.9078	20.8924	14.9231	0.0506	6	7
5	5	0.15135	26.4288	0.0267592	19.8216	19.8216	26.4288	0.01445	3	3
5	5	0.2571	23.3372	0.138662	11.6686	19.4477	31.1163	0.0694	3	5
5	5	0.2308	21.6638	0.117851	17.331	30.3293	8.66551	0.0372	4	7
5	5	0.15515	19.3361	0.0592975	6.44538	32.2269	19.3361	0.0159	1	5
5	5	0.15315	32.6477	0.203069	19.5886	13.0591	19.5886	0.04595	3	2
5	5	0.25	20	0.0574	20	12	20	0.00975	5	3
5	5	0.32485	21.5484	0.0997383	27.7051	18.4701	21.5484	0.0242	9	6
5	5	0.29025	20.6718	0.126787	24.1171	24.1171	27.5624	0.01165	7	7
5	5	0.22155	22.5683	0.148725	18.0546	36.1092	27.0819	0.03135	4	8
5	5	0.32395	21.6083	0.0889026	24.6952	24.6952	21.6083	0.04535	8	8
5	5	0.1585	25.2366	0.0968454	25.2366	31.5457	6.30915	0.10465	4	5
5	5	0.13595	29.4226	0.0974623	44.1339	22.0669	22.0669	0.011	6	3
5	5	0.45105	17.7364	0.0872409	24.3875	19.9534	19.9534	0.02625	11	9
5	5	0.31055	22.5407	0.254548	19.3206	22.5407	19.3206	0.0716	6	7
5	5	0.2066	24.2014	0.128993	19.3611	29.0416	19.3611	0.01215	4	6
5	5	0.22235	22.4871	0.149764	13.4922	13.4922	22.4871	0.00155	3	3
5	5	0.41425	14.484	0.0766445	28.968	31.382	7.242	0.07255	12	13
5	5	0.26935	22.2758	0.13217	18.5632	18.5632	22.2758	0.0062	5	5
5	5	0.17485	22.8768	0.077209	28.5959	22.8768	28.5959	0.03155	5	4
5	5	0.293	23.8908	0.140785	23.8908	27.3038	30.7167	0.06245	7	8
5	5	0.27235	22.0305	0.152561	18.3587	18.3587	14.687	0.0147	5	5
5	5	0.22465	22.2568	0.109281	22.2568	22.2568	13.3541	0.00265	5	5
5	5	0.22655	22.0702	0.217391	26.4842	22.0702	22.0702	0.01625	6	5
5	5	0.2117	23.6183	0.144072	28.342	33.0657	23.6183	0.04415	6	7
5	5	0.3921	17.8526	0.0952563	25.5037	28.0541	20.403	0.0529	10	11
5	5	0.27555	21.7746	0.17583	32.6619	10.8873	18.1455	0.02065	9	3
4	5	0.297	16.835	0.0617845	0	20.202	0	0.1131	0	6
4	5	0.35945	22.2562	0.137015	22.2562	22.2562	16.6922	0.0027	8	8
4	5	0.2496	24.0385	0.132212	16.0256	8.01282	16.0256	-0.0002	4	2
4	5	0.36245	22.072	0.164712	16.554	16.554	13.795	0.0126	6	6
4	5	0.3061	22.8683	0.0859196	13.0676	19.6014	9.80072	0.1531	4	6
4	5	0.46115	17.3479	0.0659222	8.67397	17.3479	15.1794	0.035	4	8
4	5	0.25735	23.3146	0.0656693	19.4288	23.3146	19.4288	0.11015	5	6
4	5	0.40105	22.4411	0.0941279	7.48036	17.4542	12.4673	0.00235	3	7
4	5	0.403	22.3325	0.120223	7.44417	19.8511	9.92556	0.01865	3	8
4	5	0.3988	20.0602	0.0980441	30.0903	12.5376	15.0451	0.0196	12	5
4	5	0.2634	22.779	0.0647304	11.3895	15.186	11.3895	0.0307	3	4
4	5	0.45825	21.8221	0.113257	15.2755	15.2755	17.4577	0.01225	7	7
4	5	0.39015	20.5049	0.0558759	25.6312	12.8156	23.0681	0.10245	10	5
4	5	0.2679	26.1292	0.196155	11.1982	18.6637	22.3964	0.0278	3	5
4	5	0.5376	20.4613	0.117187	13.0208	16.7411	14.881	0.0131	7	9
4	5	0.25125	19.9005	0.125572	19.9005	11.9403	19.9005	0.02365	5	3
4	5	0.15385	25.9994	0.0848229	19.4995	6.49984	19.4995	0.00875	3	1
4	5	0.28835	20.808	0.0929426	13.872	17.34	27.7441	0.01475	4	5
4	5	0.254	23.622	0.10689	23.622	23.622	11.811	0.13705	6	6
4	5	0.35445	22.5702	0.129073	14.1064	16.9276	22.5702	0.01105	5	6
4	5	0.41325	19.3587	0.0865094	19.3587	14.5191	9.67937	0.0576	8	6
4	5	0.24925	24.0722	0.145035	20.0602	16.0481	16.0481	0.10295	5	4
4	5	0.14715	27.1831	0.0866463	6.79579	20.3874	20.3874	0.05265	1	3
4	5	0.3042	23.0112	0.0857988	6.57462	16.4366	23.0112	0.05435	2	5
4	5	0.246	28.4553	0.141667	20.3252	20.3252	8.13008	0.20765	5	5
4	5	0.30195	23.1826	0.103163	13.2472	9.93542	16.559	0.0269	4	3
4	5	0.31495	19.0506	0.0587395	15.8755	6.35021	15.8755	0.041	5	2
4	5	0.2972	23.5532	0.0548452	13.459	16.8237	20.1884	0.0035	4	5
4	5	0.27955	21.4631	0.084958	10.7315	10.7315	14.3087	0.08535	3	3
4	5	0.2397	25.0313	0.166249	8.34376	16.6875	12.5156	0.0049	2	4
4	5	0.3126	22.3928	0.0980486	9.59693	12.7959	22.3928	0.0434	3	4
4	5	0.1996	25.0501	0.158567	15.0301	15.0301	10.02	0.0124	3	3
4	5	0.2524	23.7718	0.0493265	11.8859	15.8479	15.8479	0.0807	3	4
4	5	0.34025	23.5121	0.154592	14.6951	23.5121	11.7561	0.00405	5	8
4	5	0.3578	19.564	0.113471	16.7691	11.1794	22.3589	0.0233	6	4
4	5	0.29605	23.6447	0.174633	6.75562	13.5112	20.2668	0.0156	2	4
4	5	0.3129	19.1755	0.0329179	15.9795	9.58773	3.19591	0.2191	5	3
4	5	0.26295	22.818	0.0832858	26.621	15.212	15.212	0.07165	7	4
4	5	0.1982	20.1816	0.0835015	20.1816	20.1816	20.1816	0.003	4	4
4	5	0.2536	27.6025	0.164629	27.6025	27.6025	11.8297	0.1138	7	7
4	5	0.1866	26.7953	0.056538	32.1543	21.4362	21.4362	0.0072	6	4
4	5	0.24855	24.14	0.11728	12.07	20.1167	16.0933	0.02715	3	5
4	5	0.16205	24.6837	0.0826905	18.5128	30.8547	6.17093	0.1534	3	5
4	5	0.2387	25.1362	0.0909091	16.7574	16.7574	16.7574	0.08285	4	4
4	5	0.26385	22.7402	0.171499	22.7402	18.9502	11.3701	0.1367	6	5
4	5	0.2506	23.9425	0.136073	11.9713	7.98085	23.9425	0.01455	3	2
4	5	0.24985	24.0144	0.130879	0	8.0048	4.0024	0.15425	0	2
4	5	0.2109	23.7079	0.151731	14.2248	14.2248	23.7079	0.02675	3	3
4	5	0.20635	24.2307	0.102738	14.5384	14.5384	14.5384	0.06555	3	3
4	5	0.28535	24.5313	0.0930436	24.5313	14.0179	14.0179	0.048	7	4
4	5	0.24765	28.2657	0.0932768	8.07591	24.2277	8.07591	0.0879	2	6
4	5	0.24875	20.1005	0.081809	24.1206	16.0804	8.0402	0.09585	6	4
4	5	0.2482	28.2031	0.13054	16.116	20.145	24.1741	0.05225	4	5
4	5	0.2391	25.0941	0.0895023	12.5471	12.5471	12.5471	0.12745	3	3
4	5	0.19925	25.0941	0.0843162	15.0565	15.0565	10.0376	0.0617	3	3
4	5	0.3172	22.0681	0.096942	18.9155	25.2207	15.7629	0.0464	6	8
4	5	0.23445	25.5918	0.168053	8.5306	12.7959	17.0612	0.0403	2	3
4	5	0.3421	23.385	0.0961707	17.5387	11.6925	11.6925	0.2065	6	4
4	5	0.2959	23.6566	0.0532274	16.8976	10.1386	20.2771	0.05585	5	3
4	5	0.7132	18.2277	0.120373	15.4234	19.6298	18.2277	0.013	11	14
4	5	0.24995	20.004	0.0784157	24.0048	8.0016	16.0032	0.09895	6	2
4	5	0.2493	20.0562	0.121139	36.1011	32.0899	36.1011	0.08255	9	8
4	5	0.2602	23.0592	0.0643736	34.5888	15.3728	23.0592	0.11855	9	4
4	5	0.297	23.569	0.127441	20.202	6.73401	3.367	0.2515	6	2
4	5	0.20775	14.4404	0.0257521	19.2539	24.0674	24.0674	0.0402	4	5
4	5	0.20525	24.3605	0.10475	4.87211	9.74421	14.6163	0.04135	1	2
4	5	0.2569	27.248	0.0850525	15.5703	3.89257	15.5703	0.07505	4	1
4	5	0.13995	28.5816	0.194712	21.4362	7.14541	7.14541	0.0405	3	1
4	5	0.29365	23.8379	0.164652	20.4325	13.6217	13.6217	0.06215	6	4
4	5	0.2351	25.5211	0.143131	12.7605	21.2675	21.2675	0.01915	3	5
4	5	0.2045	24.4499	0.16846	9.77995	24.4499	19.5599	0.00115	2	5
4	5	0.2588	27.0479	0.114954	15.456	19.3199	15.456	0.00075	4	5
4	5	0.2495	24.0481	0.143687	28.0561	20.0401	24.0481	0.0893	7	5
4	5	0.2124	23.5405	0.179849	4.7081	14.1243	23.5405	0.00805	1	3
4	5	0.30285	23.1138	0.152881	16.5098	23.1138	9.90589	0.0881	5	7
4	5	0.1999	20.01	0.0355178	10.005	10.005	45.0225	0.1081	2	2
4	5	0.2524	23.7718	0.0554675	15.8479	23.7718	15.8479	0.089	4	6
4	5	0.302	23.1788	0.124503	16.5563	26.4901	36.4238	0.02355	5	8
4	5	0.30955	25.844	0.13665	16.1525	22.6135	16.1525	0.0269	5	7
4	5	0.19415	25.7533	0.0870461	10.3013	20.6026	10.3013	0.02585	2	4
4	5	0.24815	24.1789	0.119081	16.1193	8.05964	16.1193	0.01345	4	2
4	5	0.3537	19.7908	0.0891999	19.7908	19.7908	16.9635	0.01705	7	7
4	5	0.18885	26.476	0.0799576	15.8856	15.8856	5.29521	0.1374	3	3
4	5	0.3388	23.6128	0.0826446	8.85478	20.6612	8.85478	0.09515	3	7
4	5	0.341	23.4604	0.184018	20.5279	17.5953	14.6628	0.0667	7	6
4	5	0.1918	26.0688	0.126955	26.0688	15.6413	15.6413	0.1205	5	3
4	5	0.266	22.5564	0.0943609	18.797	18.797	33.8346	0.0039	5	5
4	5	0.3637	21.9962	0.074512	16.4971	13.7476	2.74952	0.16	6	5
4	5	0.25455	23.571	0.0986054	15.714	7.857	27.4995	0.02905	4	2
4	5	0.29605	23.6447	0.159095	6.75562	16.889	13.5112	0.07725	2	5
4	5	0.2364	25.3807	0.140228	8.46024	21.1506	42.3012	0.00895	2	5
4	5	0.0811	36.9914	0.0160296	0	0	24.6609	0.0021	0	0
4	5	0.14525	27.5387	0.101893	13.7694	13.7694	27.5387	0.09385	2	2
4	5	0.34205	23.3884	0.0999854	14.6177	17.5413	20.4648	0.04545	5	6
4	5	0.3325	24.0602	0.124962	12.0301	12.0301	21.0526	0.00215	4	4
4	5	0.25005	23.9952	0.130974	15.9968	19.996	31.9936	0.01595	4	5
4	5	0.24895	24.1012	0.13577	0	16.0675	16.0675	0.09415	0	4
4	5	0.19585	25.5297	0.128415	15.3178	25.5297	20.4238	0.1176	3	5
4	5	0.3082	22.7125	0.12573	12.9786	22.7125	29.2018	0.00025	4	7
4	5	0.2975	23.5294	0.0556303	20.1681	13.4454	26.8908	0.0345	6	4
4	5	0.29425	23.7893	0.0944775	23.7893	10.1954	23.7893	0.062	7	3
4	5	0.29095	24.0591	0.0520708	13.7481	17.1851	6.87403	0.1386	4	5
4	5	0.2387	25.1362	0.107876	16.7574	16.7574	20.9468	0.01965	4	4
4	5	0.2315	25.9179	0.0725702	17.2786	17.2786	8.63931	0.095	4	4
4	5	0.2521	23.8001	0.122372	11.9	27.7668	15.8667	0.1015	3	7
4	5	0.23585	25.4399	0.132711	29.6799	12.7199	33.9199	0.0062	7	3
4	5	0.28945	24.1838	0.126101	24.1838	24.1838	17.2741	0.09975	7	7
4	5	0.23385	25.6575	0.16207	21.3812	25.6575	21.3812	0.0094	5	6
4	5	0.35185	22.737	0.164132	17.0527	17.0527	5.68424	0.1559	6	6
4	5	0.357	22.409	0.106162	22.409	16.8067	16.8067	0.0102	8	6
4	5	0.4333	23.0787	0.100969	13.8472	11.5393	13.8472	0.0036	6	5
4	5	0.3757	23.9553	0.125632	15.9702	7.98509	15.9702	0.0282	6	3
4	5	0.28815	24.2929	0.139684	24.2929	13.8817	24.2929	0.032	7	4
4	5	0.24975	24.024	0.104505	24.024	4.004	16.016	0.02295	6	1
4	5	0.28965	24.1671	0.100811	20.7147	13.8098	17.2622	0.0108	6	4
4	5	0.30045	23.2984	0.111167	23.2984	16.6417	9.98502	0.0997	7	5
4	5	0.296	27.027	0.106081	10.1351	13.5135	20.2703	0.00625	3	4
4	5	0.38975	20.526	0.113406	10.263	23.0917	10.263	0.04565	4	9
4	5	0.3581	22.3401	0.131109	11.1701	16.7551	11.1701	0.08405	4	6
4	5	0.399	22.5564	0.0893484	7.5188	15.0376	15.0376	0.04305	3	6
4	5	0.14705	27.2016	0.113567	20.4012	20.4012	13.6008	0.02325	3	3
4	5	0.21345	23.4247	0.134692	18.7398	9.36988	9.36988	0.0097	4	2
4	5	0.19605	15.3022	0.0119867	15.3022	25.5037	20.403	0.02975	3	5
4	5	0.23325	25.7235	0.117685	21.4362	8.57449	4.28725	0.15665	5	2
4	5	0.2704	29.5858	0.0931953	14.7929	33.284	33.284	0.0365	4	9
4	5	0.2673	22.4467	0.115039	33.67	11.2233	22.4467	0.0888	9	3
4	5	0.2444	24.5499	0.13707	20.4583	24.5499	20.4583	0.0525	5	6
4	5	0.23555	25.4723	0.0808745	29.7177	16.9815	25.4723	0.0747	7	4
4	5	0.48845	16.3783	0.0842461	30.7094	18.4256	24.5675	0.0028	15	9
4	5	0.2885	20.7972	0.0764298	27.7296	10.3986	27.7296	0.16095	8	3
4	5	0.29015	24.1255	0.132345	20.679	6.89299	31.0184	0	6	2
4	5	0.24305	24.6863	0.140095	12.3431	12.3431	24.6863	0.02865	3	3
4	5	0.2987	23.4349	0.119518	20.087	23.4349	26.7827	0.0144	6	7
4	5	0.3365	23.7741	0.0995542	29.7177	17.8306	17.8306	0.00455	10	6
4	5	0.24285	24.7066	0.137122	24.7066	16.4711	20.5888	0.01155	6	4
4	5	0.29015	24.1255	0.126659	13.786	17.2325	20.679	0.0286	4	5
4	5	0.3457	23.1415	0.0986404	11.5707	14.4634	14.4634	0.0641	4	5
4	5	0.28535	21.0268	0.0730682	10.5134	3.50447	21.0268	0.02435	3	1
4	5	0.2707	25.8589	0.120613	7.38825	7.38825	18.4706	0.0735	2	2
4	5	0.19635	25.4647	0.0443086	10.1859	10.1859	25.4647	0.03675	2	2
4	5	0.24345	24.6457	0.107003	16.4305	16.4305	16.4305	0.0812	4	4
4	5	0.37825	23.7938	0.0871117	18.5063	10.575	13.2188	0.0352	7	4
4	5	0.2907	24.0798	0.0773994	13.7599	10.3199	10.3199	0.01495	4	3
4	5	0.24155	24.8396	0.196233	12.4198	20.6996	16.5597	0.0181	3	5
4	5	0.25065	23.9378	0.10772	15.9585	11.9689	11.9689	0.13715	4	3
4	5	0.1894	31.679	0.127244	26.3992	15.8395	15.8395	0.0165	5	3
4	5	0.18785	26.617	0.186053	5.3234	0	21.2936	0.0283	1	0
4	5	0.2031	24.6184	0.105613	19.6947	4.92368	24.6184	0.01025	4	1
4	5	0.19035	31.5209	0.0598897	21.0139	5.25348	31.5209	0.06705	4	1
4	5	0.28475	24.583	0.176471	17.5593	21.0711	14.0474	0.06465	5	6
4	5	0.27795	25.1844	0.127181	7.19554	10.7933	7.19554	0.00735	2	3
4	5	0.28685	20.9169	0.11574	6.97229	17.4307	10.4584	0.00345	2	5
4	5	0.32575	24.5587	0.130622	15.3492	21.4889	24.5587	0.07005	5	7
4	5	0.2871	24.3817	0.117381	17.4155	20.8986	10.4493	0.0949	5	6
4	5	0.33805	23.6651	0.124982	11.8326	26.6233	20.707	0.0206	4	9
4	5	0.28925	24.2005	0.128954	31.115	10.3717	10.3717	0.0186	9	3
4	5	0.3875	23.2258	0.128774	7.74194	5.16129	15.4839	0.07075	3	2
4	5	0.3763	21.2596	0.119851	15.9447	15.9447	18.6022	0.0082	6	6
4	5	0.23415	25.6246	0.136665	12.8123	17.0831	4.27077	0.16755	3	4
4	5	0.24465	24.5248	0.0803188	20.4374	12.2624	12.2624	0.04285	5	3
4	5	0.3324	21.059	0.101685	9.02527	21.059	12.0337	0.057	3	7
4	5	0.20015	24.9813	0.109418	14.9888	14.9888	24.9813	0.0126	3	3
4	5	0.24135	20.7168	0.0965403	20.7168	24.8602	8.28672	0.1022	5	6
4	5	0.1874	26.6809	0.100587	21.3447	21.3447	16.0085	0.00285	4	4
4	5	0.29095	27.4961	0.122701	6.87403	37.8072	17.1851	0.04825	2	11
4	5	0.24015	24.9844	0.157402	12.4922	16.6563	20.8203	0.0768	3	4
4	5	0.2413	24.8653	0.037298	8.28844	16.5769	16.5769	0.0593	2	4
4	5	0.23815	25.1942	0.0877598	12.5971	29.3932	8.39807	0.04075	3	7
4	5	0.30255	26.4419	0.167576	19.8314	23.1367	16.5262	0.016	6	7
4	5	0.24065	20.7771	0.0945356	12.4662	24.9325	12.4662	0.0043	3	6
4	5	0.2514	19.8886	0.0745823	7.95545	7.95545	7.95545	0.1272	2	2
4	5	0.23825	25.1836	0.150892	12.5918	12.5918	4.19727	0.04545	3	3
4	5	0.27035	25.8924	0.147402	7.39782	11.0967	22.1935	0.0366	2	3
4	5	0.24495	24.4948	0.162482	12.2474	8.16493	16.3299	0.12115	3	2
4	5	0.24475	24.5148	0.167314	8.1716	20.429	16.3432	0.0137	2	5
4	5	0.25015	23.9856	0.124126	11.9928	3.9976	19.988	0.0424	3	1
4	5	0.24515	24.4748	0.165409	16.3165	16.3165	20.3957	0.1065	4	4
4	5	0.3451	23.1817	0.125471	8.69313	17.3863	28.9771	0.0165	3	6
4	5	0.29405	23.8055	0.118687	27.2063	17.0039	17.0039	0.00985	8	5
4	5	0.29705	23.5651	0.208382	13.4657	16.8322	13.4657	0.00445	4	5
4	5	0.2221	27.0149	0.115714	27.0149	27.0149	18.0099	0.03335	6	6
4	5	0.4296	23.2775	0.110568	13.9665	18.622	4.65549	0.12615	6	8
4	5	0.2323	25.8287	0.13474	17.2191	4.30478	8.60956	0.03005	4	1
4	5	0.2435	24.6407	0.116016	24.6407	28.7474	20.5339	0.0993	6	7
4	5	0.33235	24.071	0.0878592	12.0355	27.0799	15.0444	0.00405	4	9
4	5	0.28305	24.7306	0.168698	17.6647	14.1318	21.1977	0.0059	5	4
4	5	0.47465	21.0682	0.106078	10.5341	12.6409	16.8545	0.0358	5	6
4	5	0.57075	19.2729	0.0868156	8.7604	17.5208	8.7604	0.1724	5	10
4	5	0.2869	20.9132	0.0838271	20.9132	20.9132	17.4277	0.03015	6	6
4	5	0.32175	24.864	0.0952603	12.432	9.32401	12.432	0.0199	4	3
4	5	0.28165	21.303	0.113971	10.6515	21.303	14.202	0.0388	3	6
4	5	0.24205	24.7883	0.117744	20.6569	28.9196	20.6569	0.00405	5	7
4	5	0.4246	18.8413	0.120937	35.3274	30.6171	14.1309	0.00135	15	13
4	5	0.24775	24.218	0.0875883	24.218	16.1453	8.07265	0.0163	6	4
4	5	0.28735	24.3605	0.152949	20.8805	17.4004	20.8805	0.08265	6	5
4	5	0.2281	17.5362	0.0589654	17.5362	26.3043	13.1521	0.0314	4	6
4	5	0.24065	24.9325	0.0968211	12.4662	16.6216	12.4662	0.06255	3	4
4	5	0.31865	25.1059	0.188294	12.553	15.6912	3.13824	0.24365	4	5
4	5	0.2852	24.5442	0.124123	14.0252	17.5316	17.5316	0.0033	4	5
4	5	0.1425	28.0702	0.187719	14.0351	0	21.0526	0.03765	2	0
4	5	0.33985	20.5973	0.128586	14.7124	29.4247	14.7124	0.13035	5	10
4	5	0.33455	23.9127	0.178897	17.9345	17.9345	14.9454	0.01655	6	6
4	5	0.29285	23.903	0.108076	17.0736	20.4883	13.6589	0.08705	5	6
4	5	0.6118	17.9797	0.0843413	17.9797	16.3452	17.9797	0.0284	11	10
4	5	0.32825	24.3717	0.107235	18.2788	12.1858	15.2323	0.0648	6	4
4	5	0.1973	25.3421	0.0899645	20.2737	20.2737	30.4105	0.0319	4	4
4	5	0.29935	23.384	0.126107	23.384	13.3623	10.0217	0.1009	7	4
4	5	0.255	23.5294	0.142941	19.6078	19.6078	11.7647	0.11985	5	5
4	5	0.3362	23.7954	0.183373	23.7954	20.8209	26.7698	0.038	8	7
4	5	0.52385	19.0894	0.0763577	28.6342	19.0894	20.9984	0.1421	15	10
4	5	0.38065	21.0167	0.134901	13.1354	21.0167	10.5083	0.05675	5	8
4	5	0.17665	28.3046	0.131333	22.6436	16.9827	16.9827	0.0468	4	3
4	5	0.2411	24.8859	0.145998	24.8859	16.5906	16.5906	0.0118	6	4
4	5	0.39	23.0769	0.141282	15.3846	10.2564	17.9487	0.00075	6	4
4	5	0.1957	20.4394	0.163771	15.3296	5.10986	10.2197	0.05	3	1
4	5	0.27635	25.3302	0.117424	14.4744	18.093	18.093	0.01075	4	5
4	5	0.15015	26.64	0.139194	13.32	13.32	13.32	0.0123	2	2
4	5	0.36325	19.2705	0.0864418	30.2822	11.0117	13.7646	0.00325	11	4
4	5	0.21455	18.6437	0.0766721	9.32184	0	4.66092	0.02825	2	0
4	5	0.2647	26.445	0.17227	15.1114	15.1114	15.1114	0.0663	4	4
4	5	0.2822	28.3487	0.176116	7.08717	14.1743	14.1743	0.1486	2	4
4	5	0.2548	23.5479	0.224882	15.6986	15.6986	19.6232	0.11445	4	4
4	5	0.30675	22.8199	0.239935	19.5599	13.0399	19.5599	0.01945	6	4
4	5	0.2873	20.8841	0.15315	3.48068	17.4034	3.48068	0.18485	1	5
4	5	0.2422	24.7729	0.0679191	8.25764	12.3865	8.25764	0.0119	2	3
4	5	0.1917	26.0824	0.13276	10.433	10.433	10.433	0.1558	2	2
4	5	0.4169	23.9866	0.0915088	11.9933	9.59463	9.59463	0.06355	5	4
4	5	0.37485	24.0096	0.103641	10.6709	10.6709	8.0032	0.04735	4	4
4	5	0.24405	24.5851	0.113706	16.3901	8.19504	12.2926	0.04085	4	2
4	5	0.33385	23.9629	0.169837	8.98607	14.9768	11.9814	0.05475	3	5
4	5	0.3428	20.4201	0.0752625	11.6686	8.75146	14.5858	0.0594	4	3
4	5	0.2846	24.5959	0.141251	17.5685	7.02741	14.0548	0.027	5	2
4	5	0.3301	24.2351	0.0646774	12.1175	9.08816	15.1469	0.0594	4	3
4	5	0.4146	24.1196	0.144959	21.7077	19.2957	19.2957	0.0329	9	8
4	5	0.24075	24.9221	0.121911	12.4611	12.4611	12.4611	0.04035	3	3
4	5	0.2467	24.321	0.12728	8.10701	12.1605	24.321	0.0109	2	3
4	5	0.2812	21.3371	0.107219	14.2248	17.7809	14.2248	0.02655	4	5
4	5	0.2936	20.436	0.0688011	13.624	10.218	27.248	0.0246	4	3
4	5	0.09655	31.072	0.0046608	10.3573	0	10.3573	0.0675	1	0
4	5	0.18065	27.6778	0.0738998	22.1423	11.0711	11.0711	0.05495	4	2
4	5	0.2235	22.3714	0.0892617	22.3714	8.94855	17.8971	0.09245	5	2
4	5	0.48115	16.6268	0.0613114	12.4701	16.6268	12.4701	0.0653	6	8
4	5	0.28505	21.0489	0.0901596	7.01631	14.0326	21.0489	0.00725	2	4
4	5	0.2608	23.0061	0.101994	19.1718	11.5031	11.5031	0.06025	5	3
4	5	0.24045	24.9532	0.0939904	4.15887	8.31774	16.6355	0.0038	1	2
4	5	0.25755	19.4137	0.0617356	11.6482	27.1792	3.88274	0.0203	3	7
4	5	0.18825	26.5604	0.0916335	5.31208	5.31208	21.2483	0.0663	1	1
4	5	0.3201	24.9922	0.138707	9.37207	9.37207	21.8682	0.0137	3	3
4	5	0.23545	25.4831	0.114462	21.2359	16.9887	8.49437	0.11495	5	4
4	5	0.32045	21.8443	0.116399	15.6031	12.4824	9.36183	0.11925	5	4
4	5	0.33605	20.8302	0.0284184	11.903	5.9515	11.903	0.1195	4	2
4	5	0.38265	20.9068	0.0611525	20.9068	7.84006	10.4534	0.0331	8	3
4	5	0.24075	24.9221	0.162201	12.4611	8.30737	8.30737	0.08285	3	2
4	5	0.44	22.7273	0.123295	13.6364	11.3636	13.6364	0.0087	6	5
4	5	0.4165	24.0096	0.133733	16.8067	12.0048	14.4058	0.0254	7	5
4	5	0.42915	23.3019	0.129209	9.32075	16.3113	11.6509	0.0964	4	7
4	5	0.32845	24.3568	0.138225	12.1784	21.3122	6.08921	0.1477	4	7
4	5	0.226	26.5487	0.0811947	8.84956	8.84956	8.84956	0.0043	2	2
4	5	0.35835	25.1151	0.104925	11.1623	8.3717	19.534	0.11375	4	3
4	5	0.2813	24.8845	0.109669	17.7746	10.6648	10.6648	0.1181	5	3
4	5	0.21875	27.4286	0.118171	4.57143	4.57143	18.2857	0.03975	1	1
4	5	0.2354	25.4885	0.0875106	16.9924	12.7443	8.49618	0.12165	4	3
4	5	0.32965	24.2682	0.153799	9.10056	15.1676	9.10056	0.0354	3	5
4	5	0.37155	18.84	0.088548	10.7657	2.69143	18.84	0.00265	4	1
4	5	0.327	27.5229	0.174312	15.2905	12.2324	18.3486	0.0703	5	4
4	5	0.2767	25.2982	0.114926	14.4561	21.6841	3.61402	0.0953	4	6
4	5	0.1295	30.888	0.0872587	15.444	7.72201	23.166	0.037	2	1
4	5	0.27905	25.0851	0.149436	0	10.7508	14.3343	0.01745	0	3
4	5	0.3724	24.1676	0.126477	2.68528	10.7411	16.1117	0.0888	1	4
4	5	0.37565	21.2964	0.0879808	15.9723	2.66205	5.3241	0.0481	6	1
4	5	0.28155	24.8624	0.126798	14.2071	7.10353	14.2071	0.0843	4	2
4	5	0.3362	23.7954	0.0928019	0	0	5.94884	0.0253	0	0
4	5	0.18775	26.6312	0.0623169	5.32623	10.6525	10.6525	0.1313	1	2
4	5	0.32575	21.4889	0.0621642	12.2794	9.20952	9.20952	0.06135	4	3
4	5	0.57525	17.3837	0.0682312	8.69187	8.69187	5.21512	0.0061	5	5
4	5	0.22535	26.6252	0.172177	8.87508	8.87508	4.43754	0.14115	2	2
4	5	0.14165	28.2386	0.121426	0	0	0	0.15065	0	0
4	5	0.25255	27.7173	0.214017	7.91922	0	3.95961	0.20315	2	0
4	5	0.33895	23.6023	0.17687	8.85086	0	2.95029	0.2247	3	0
4	5	0.2787	25.1166	0.112666	10.7643	3.58809	7.17618	0.15075	3	1
4	5	0.29785	23.5018	0.154104	10.0722	6.71479	26.8592	0.00535	3	2
4	5	0.2867	24.4158	0.164981	0	10.4639	3.48797	0.24775	0	3
4	5	0.2675	26.1682	0.124112	11.215	3.73832	14.9533	0.0172	3	1
4	5	0.29025	24.1171	0.134022	17.2265	10.3359	13.7812	0.10425	5	3
4	5	0.37935	23.7248	0.11177	10.5444	13.1804	10.5444	0.14965	4	5
4	5	0.31955	21.9058	0.114067	18.7764	15.647	15.647	0.0412	6	5
4	5	0.4203	19.034	0.0747085	23.7925	7.13776	2.37925	0.03	10	3
4	5	0.2841	24.6392	0.111228	17.5994	7.03977	7.03977	0.1193	5	2
4	5	0.3343	23.9306	0.135058	8.97398	11.9653	11.9653	0.0501	3	4
4	5	0.19095	26.1849	0.0940037	10.4739	15.7109	31.4218	0.02035	2	3
4	5	0.2964	23.6167	0.106107	16.8691	23.6167	10.1215	0.1148	5	7
4	5	0.3852	25.9605	0.195872	18.1724	7.78816	2.59605	0.26335	7	3
4	5	0.2841	24.6392	0.135516	10.5597	7.03977	14.0795	0.01885	3	2
4	5	0.2689	26.032	0.142246	14.8754	14.8754	18.5943	0.05135	4	4
4	5	0.27615	25.3485	0.1673	14.4849	10.8637	7.24244	0.09835	4	3
4	5	0.2698	25.9451	0.137509	11.1193	11.1193	14.8258	0.01725	3	3
4	5	0.236	29.661	0.114619	16.9492	4.23729	29.661	0.0034	4	1
4	5	0.29275	27.3271	0.200171	6.83177	23.9112	13.6635	0.07545	2	7
4	5	0.3142	28.6442	0.125239	12.7307	22.2788	12.7307	0.09285	4	7
4	5	0.4095	21.978	0.164835	9.76801	9.76801	12.21	0.11545	4	4
4	5	0.46865	21.3379	0.128347	17.0703	12.8027	12.8027	0.14525	8	6
4	5	0.26045	26.8766	0.143022	3.83951	11.5185	7.67902	0.1123	1	3
4	5	0.2691	26.0126	0.141769	18.5805	18.5805	11.1483	0.01655	5	5
4	5	0.32445	24.6571	0.124364	21.575	21.575	12.3286	0.1054	7	7
4	5	0.3724	24.1676	0.131445	16.1117	16.1117	18.797	0.0113	6	6
4	5	0.23775	25.2366	0.191377	21.0305	16.8244	16.8244	0.0183	5	4
4	5	0.2687	29.773	0.130629	7.44325	3.72162	14.8865	0.05415	2	1
4	5	0.3184	21.9849	0.111652	9.42211	9.42211	12.5628	0.0443	3	3
4	5	0.30275	23.1214	0.106193	16.5153	19.8183	16.5153	0.1237	5	6
4	5	0.2834	28.2287	0.150847	17.6429	24.7001	14.1143	0.00595	5	7
4	5	0.30735	22.7753	0.124776	16.2681	13.0145	16.2681	0.04515	5	4
4	5	0.28185	24.8359	0.12826	10.644	10.644	28.3839	0.0023	3	3
4	5	0.2803	24.9732	0.150375	14.2704	10.7028	24.9732	0.03365	4	3
4	5	0.2815	24.8668	0.112433	14.2096	17.762	28.4192	0.0236	4	5
4	5	0.2649	26.4251	0.172518	18.875	7.55002	7.55002	0.05935	5	2
4	5	0.37445	24.0353	0.111096	10.6823	21.3647	13.3529	0.0516	4	8
4	5	0.2739	25.5568	0.135086	7.30194	14.6039	25.5568	0.05065	2	4
4	5	0.27565	25.3945	0.119717	18.1389	18.1389	25.3945	0.07265	5	5
4	5	0.3219	24.8524	0.129077	27.959	18.6393	12.4262	0.01135	9	6
4	5	0.6368	15.7035	0.0583386	15.7035	17.2739	7.85176	0.0831	10	11
4	5	0.19815	30.2801	0.219531	5.04668	15.14	10.0934	0.02025	1	3
4	5	0.23855	25.152	0.152379	4.19199	4.19199	12.576	0.0185	1	1
4	5	0.27095	22.1443	0.1611	14.7629	18.4536	14.7629	0.0878	4	5
4	5	0.2398	25.0209	0.131776	16.6806	0	16.6806	0.0033	4	0
4	5	0.3195	21.9092	0.111737	12.5196	25.0391	15.6495	0.0918	4	8
4	5	0.2866	20.9351	0.0382066	13.9567	6.97837	13.9567	0.0662	4	2
4	5	0.3838	20.8442	0.0969255	10.4221	10.4221	7.81657	0.0607	4	4
4	5	0.19985	25.0188	0.11934	15.0113	15.0113	10.0075	0.02605	3	3
4	5	0.2242	26.7618	0.120874	17.8412	17.8412	22.3015	0.00275	4	4
4	5	0.22485	26.6845	0.117856	13.3422	8.89482	13.3422	0.01455	3	2
4	5	0.6536	18.3599	0.134945	13.7699	6.11995	12.2399	0.0707	9	4
3	5	0.31685	18.9364	0.0681711	28.4046	25.2485	0	0.0095	9	8
3	5	0.1168	34.2466	0.0706336	25.6849	42.8082	34.2466	0.01065	3	5
3	5	0.1253	23.9425	0.00399042	39.9042	31.9234	55.8659	0.00425	5	4
3	5	0.0778	38.5604	0.120823	77.1208	115.681	64.2674	0.00515	6	9
3	5	0.3495	11.4449	0.0344778	25.7511	20.0286	34.3348	0.048	9	7
3	5	0.17875	22.3776	0.0142657	11.1888	33.5664	27.972	0.0126	2	6
3	5	0.552	16.3043	0.0424819	32.6087	27.1739	18.1159	0.04275	18	15
3	5	0.78825	12.6863	0.0790993	27.9099	27.9099	30.4472	0.00925	22	22
3	5	0.62085	12.8856	0.0645083	25.7711	32.2139	25.7711	0.0406	16	20
3	5	0.03455	86.8307	0.0115774	28.9436	0	28.9436	0.0328	1	0
3	5	0.12235	32.6931	0.0866367	49.0396	49.0396	57.2129	0.01735	6	6
3	5	0.4517	15.497	0.0202568	26.5663	28.7802	30.994	0.0263	12	13
3	5	0.3377	11.8448	0.0435298	29.6121	38.4957	23.6897	0.0087	10	13
3	5	0.1824	16.4474	0.00328947	54.8246	32.8947	21.9298	0.029	10	6
3	5	0.1635	24.4648	0.228135	42.8135	24.4648	24.4648	0.0497	7	4
3	5	0.11305	26.5369	0.0207873	8.84564	53.0739	26.5369	0.0488	1	6
3	5	0.4146	14.4718	0.0346117	33.7675	31.3555	24.1196	0.05675	14	13
3	5	0.1287	23.31	0.0606061	62.1601	15.54	38.85	0.0061	8	2
3	5	0.2902	27.5672	0.115093	37.9049	31.0131	37.9049	0.01095	11	9
3	5	0.32425	24.6723	0.0898998	43.1766	24.6723	27.7564	0.0491	14	8
3	5	0.3146	15.8932	0.0642085	28.6078	25.4291	28.6078	0.0207	9	8
3	5	0.217	13.8249	0.0417051	18.4332	32.2581	36.8664	0.01535	4	7
3	5	0.11095	36.0523	0.0919333	27.0392	45.0653	45.0653	0.00655	3	5
3	5	0.3445	11.611	0.0433962	46.4441	49.3469	34.8331	0.02055	16	17
3	5	0.4399	15.9127	0.0516026	43.1916	34.0987	31.8254	0.00385	19	15
3	5	0.27585	18.1258	0.0487584	39.8767	29.0013	32.6264	0.08195	11	8
3	5	0.2546	15.7109	0.00530244	27.4941	23.5664	23.5664	0.0112	7	6
3	5	0.17725	16.9252	0.00366714	45.134	33.8505	22.567	0.0247	8	6
3	5	0.32	12.5	0.0564062	25	25	25	0.0362	8	8
3	5	0.2366	12.6796	0.00253593	29.5858	38.0389	8.45309	0.03575	7	9
3	5	0.3972	12.5881	0.0177492	27.6939	35.2467	40.282	0.0202	11	14
3	5	0.2155	18.5615	0.0204176	46.4037	18.5615	23.2019	0.04665	10	4
3	5	0.3604	22.1976	0.0699223	33.2963	38.8457	22.1976	0.03005	12	14
3	5	0.0795	37.7358	0.149057	25.1572	25.1572	50.3145	0.00615	2	2
3	5	0.15145	26.4114	0.0891383	33.0142	26.4114	13.2057	0.0927	5	4
3	5	0.3388	14.758	0.0687721	32.4675	26.5643	29.5159	0.01215	11	9
3	5	0.07425	40.404	0.0673401	26.936	53.8721	13.468	0.0614	2	4
3	5	0.0779	38.5109	0.204108	25.6739	25.6739	25.6739	0.01665	2	2
3	5	0.11015	27.2356	0.0163414	9.07853	54.4712	18.1571	0.0302	1	6
3	5	0.2094	14.3266	0.0570678	23.8777	19.1022	23.8777	0.0179	5	4
3	5	0.4128	12.1124	0.0700097	21.8023	24.2248	14.5349	0.03755	9	10
3	5	0.1396	21.49	0.0318768	28.6533	35.8166	14.3266	0.0439	4	5
3	5	0.1625	18.4615	0.00276923	24.6154	18.4615	6.15385	0.0913	4	3
3	5	0.1417	21.1715	0.0705716	28.2287	7.05716	42.343	0.02085	4	1
3	5	0.1305	22.9885	0.00804598	15.3257	38.3142	30.6513	0.0111	2	5
3	5	0.24685	12.1531	0.0222807	32.4083	20.2552	32.4083	0.05585	8	5
3	5	0.24555	16.29	0.0366524	12.2175	12.2175	36.6524	0.0015	3	3
3	5	0.2935	10.2215	0.0223169	10.2215	34.0716	23.8501	0.01745	3	10
3	5	0.18135	16.5426	0.00303281	44.1136	22.0568	27.571	0.00105	8	4
3	5	0.409	24.4499	0.0739609	22.0049	29.3399	26.8949	0.03285	9	12
3	5	0.5115	15.6403	0.0904203	27.3705	27.3705	25.4154	0.016	14	14
3	5	0.1308	22.9358	0.0940367	53.5168	38.2263	22.9358	0.0148	7	5
3	5	0.29095	24.0591	0.0573982	30.9332	24.0591	17.1851	0.0267	9	7
3	5	0.29365	27.2433	0.113571	13.6217	30.6487	30.6487	0.1013	4	9
3	5	0.3948	17.7305	0.127153	32.9281	32.9281	35.461	0.00215	13	13
3	5	0.2861	13.9811	0.00401957	34.9528	31.4575	27.9623	0.0255	10	9
3	5	0.27275	21.9982	0.0456462	40.33	25.6645	18.3318	0.14815	11	7
3	5	0.22955	21.7817	0.0612067	43.5635	30.4944	60.9889	0.01605	10	7
3	5	0.3715	18.8425	0.104711	29.6097	29.6097	32.3015	0.00715	11	11
3	5	0.3914	20.4394	0.0504599	33.2141	40.8789	22.9944	0.02255	13	16
3	5	0.21815	27.504	0.106349	32.088	18.336	18.336	0.00495	7	4
3	5	0.26815	18.6463	0.0738393	26.1048	18.6463	22.3755	0.0109	7	5
3	5	0.18625	16.1074	0.100403	21.4765	16.1074	37.5839	0.0128	4	3
3	5	0.3082	16.2232	0.0627839	38.9358	32.4465	38.9358	0.04935	12	10
3	5	0.3722	21.4938	0.0624664	37.6142	26.8673	32.2407	0.02905	14	10
3	5	0.3674	19.0528	0.0465433	13.6091	16.331	29.9401	0.007	5	6
3	5	0.40785	17.1632	0.0700012	36.7782	24.5188	22.0669	0.04015	15	10
3	5	0.16665	36.0036	0.136514	12.0012	6.0006	24.0024	0.09885	2	1
3	5	0.26805	18.6532	0.111733	29.8452	29.8452	11.1919	0.02915	8	8
3	5	0.32835	21.3187	0.0927364	27.4098	21.3187	30.4553	0.00305	9	7
3	5	0.278	14.3885	0.0169065	39.5683	17.9856	43.1655	0.01575	11	5
3	5	0.11855	33.741	0.157318	8.43526	16.8705	25.3058	0.0226	1	2
3	5	0.18735	26.688	0.0221511	16.0128	21.3504	42.7008	0.00185	3	4
3	5	0.4308	9.28505	0.0162488	32.4977	34.8189	32.4977	0.0005	14	15
3	5	0.1355	36.9004	0.0232472	36.9004	44.2804	7.38007	0.1345	5	6
3	5	0.2047	14.6556	0.0400586	29.3112	24.426	14.6556	0.02435	6	5
3	5	0.16335	18.3655	0.0400979	30.6091	18.3655	30.6091	0.00485	5	3
3	5	0.151	19.8675	0.0377483	33.1126	26.4901	33.1126	0.03835	5	4
3	5	0.2467	28.3745	0.208958	32.4281	16.214	36.4816	0.00025	8	4
3	5	0.30975	9.68523	0.00112994	29.0557	41.9693	54.883	0.00845	9	13
3	5	0.18345	16.3532	0.0343418	49.0597	10.9022	21.8043	0.026	9	2
3	5	0.2739	10.9529	0.0213582	36.5097	43.8116	29.2077	0.0134	10	12
3	5	0.3382	17.741	0.0554406	47.3093	35.482	53.2229	0.0175	16	12
3	5	0.1618	18.5414	0.0386279	55.6242	43.2633	67.9852	0.0349	9	7
3	5	0.2949	13.5639	0.0103425	44.0827	40.6918	27.1278	0.02995	13	12
3	5	0.41095	9.73354	0.0277406	31.634	24.3339	36.5008	0.004	13	10
3	5	0.3457	8.67804	0.0157651	28.9268	23.1415	31.8195	0.02415	10	8
3	5	0.18525	16.1943	0.0785425	26.9906	48.583	21.5924	0.0262	5	9
3	5	0.78405	10.2034	0.0190039	33.1612	31.8857	24.2331	0.02955	26	25
3	5	0.3714	10.7701	0.0399838	24.2326	32.3102	24.2326	0.02795	9	12
3	5	0.21385	14.0285	0.0411503	37.4094	32.7332	18.7047	0.074	8	7
3	5	0.2715	18.4162	0.0953959	18.4162	11.0497	22.0994	0.01265	5	3
3	5	0.26025	19.2123	0.102786	23.0548	38.4246	15.3698	0.0207	6	10
3	5	0.3438	26.178	0.13409	40.7213	34.904	23.2693	0.03055	14	12
3	5	0.37745	15.8961	0.0717976	26.4936	18.5455	23.8442	0.03455	10	7
3	5	0.3873	30.9837	0.103666	25.8198	28.4018	36.1477	0.0708	10	11
3	5	0.37545	26.6347	0.153416	29.2982	29.2982	21.3078	0.0783	11	11
3	5	0.37605	21.2738	0.119133	23.933	37.2291	23.933	0.00045	9	14
3	5	0.2983	23.4663	0.249078	33.5233	20.114	20.114	0.06135	10	6
3	5	0.1664	30.0481	0.106671	36.0577	24.0385	18.0288	0.08405	6	4
3	5	0.3671	24.5165	0.112231	32.6886	21.7924	32.6886	0.0347	12	8
3	5	0.2749	25.4638	0.223536	36.3769	21.8261	47.2899	0.0017	10	6
3	5	0.0623	48.1541	0.00722311	32.1027	0	16.0514	0.03825	2	0
3	5	0.4224	9.4697	0.0398911	28.4091	9.4697	40.2462	0.0375	12	4
3	5	0.28605	17.4795	0.0571578	41.9507	20.9754	20.9754	0.01015	12	6
3	5	0.11815	33.8553	0.0715193	16.9276	0	25.3915	0.02115	2	0
3	5	0.349	14.3266	0.0468481	22.9226	20.0573	20.0573	0.03615	8	7
3	5	0.31985	12.5059	0.0131312	43.7705	25.0117	25.0117	0.00765	14	8
3	5	0.0925	32.4324	0.00702703	43.2432	32.4324	10.8108	0.0164	4	3
3	5	0.0455	65.9341	0.0637363	65.9341	43.956	0	0.04945	3	2
3	5	0.43405	9.21553	0.00161272	20.7349	27.6466	20.7349	0.0081	9	12
3	5	0.27975	14.2985	0.0357462	21.4477	28.597	25.0223	0.04005	6	8
3	5	0.2421	16.5221	0.0580339	37.1747	24.7831	16.5221	0.10105	9	6
3	5	0.0994	30.1811	0.115694	30.1811	30.1811	30.1811	0.0047	3	3
3	5	0.70195	8.54762	0.0258565	21.369	25.6429	21.369	0.0837	15	18
3	5	0.5955	10.0756	0.0418136	23.5097	18.4719	16.7926	0.19145	14	11
3	5	0.14335	20.9278	0.0505755	13.9519	13.9519	27.9037	0.03595	2	2
3	5	0.12545	23.9139	0.0350737	0	31.8852	31.8852	0.0078	0	4
3	5	0.36105	8.3091	0.00138485	36.0061	44.3152	22.1576	0.00605	13	16
3	5	0.3163	9.48467	0.0085362	18.9693	15.8078	34.7771	0.01585	6	5
3	5	0.11485	26.121	0.11232	0	8.70701	17.414	0.0864	0	1
3	5	0.2111	14.2113	0.00189484	33.1596	37.8967	28.4225	0.0691	7	8
3	5	0.31725	12.6084	0.0272656	28.3688	12.6084	18.9125	0.124	9	4
3	5	0.1607	18.6683	0.0706285	12.4456	43.5594	18.6683	0.0017	2	7
3	5	0.25725	11.6618	0.00116618	23.3236	23.3236	27.2109	0.0621	6	6
3	5	0.47475	18.9573	0.190837	42.1274	25.2765	21.0637	0.0161	20	12
3	5	0.43055	20.9035	0.208803	27.8713	34.8392	27.8713	0.0777	12	15
3	5	0.5159	21.322	0.0900368	31.0138	19.3836	32.9521	0.0518	16	10
3	5	0.4172	16.7785	0.185163	31.1601	19.1755	23.9693	0.0307	13	8
3	5	0.3394	23.571	0.167796	26.5174	20.6246	20.6246	0.0079	9	7
3	5	0.443	27.088	0.237472	31.6027	18.0587	20.316	0.04745	14	8
3	5	0.35345	19.8048	0.0932239	14.1463	25.4633	39.6096	0.01125	5	9
3	5	0.3974	20.1309	0.115752	12.5818	22.6472	27.6799	0.0276	5	9
3	5	0.48245	16.582	0.130273	26.9458	20.7275	24.873	0.02485	13	10
3	5	0.21255	28.2287	0.162785	14.1143	9.40955	9.40955	0.0092	3	2
3	5	0.51845	19.2883	0.106182	27.0036	23.1459	32.79	0.03705	14	12
3	5	0.4611	26.0247	0.0851225	43.3745	21.6873	30.3622	0.00125	20	10
3	5	0.4518	19.9203	0.0537849	26.5604	26.5604	30.9872	0.0006	12	12
3	5	0.50235	19.9064	0.110182	31.8503	19.9064	35.8316	0.03635	16	10
3	5	0.258	27.1318	0.117054	27.1318	27.1318	15.5039	0.03125	7	7
3	5	0.2327	25.7843	0.144822	47.2712	34.379	30.0817	0.0266	11	8
3	5	0.29965	20.0234	0.0367095	36.7095	23.3606	36.7095	0.01725	11	7
3	5	0.2764	25.3256	0.230282	39.7974	18.0897	18.0897	0.0901	11	5
3	5	0.3338	23.9664	0.0624626	8.98742	26.9623	26.9623	0.091	3	9
3	5	0.3345	14.9477	0.07713	29.8954	41.8535	23.9163	0.047	10	14
3	5	0.5306	18.8466	0.125989	30.1545	32.0392	26.3852	0.0067	16	17
3	5	0.53795	16.7302	0.0900641	35.3193	24.1658	13.0124	0.01485	19	13
3	5	0.434	25.3456	0.10841	18.4332	11.5207	23.0415	0.0224	8	5
3	5	0.41495	28.9191	0.170984	19.2794	26.5092	26.5092	0.01825	8	11
3	5	0.30525	16.38	0.0647011	22.932	19.656	32.76	0.0223	7	6
3	5	0.06885	43.573	0.0043573	29.0487	0	29.0487	0.03425	2	0
3	5	1.0566	15.1429	0.0949271	30.2858	29.3394	28.393	0.0581	32	31
3	5	0.3294	24.2866	0.0626897	36.4299	24.2866	27.3224	0.02385	12	8
3	5	0.502	15.9363	0.0940239	45.8167	29.8805	25.8964	0.07435	23	15
3	5	0.45	17.7778	0.0428889	26.6667	26.6667	35.5556	0.0612	12	12
3	5	0.2605	15.3551	0.0767754	26.8714	23.0326	19.1939	0.03435	7	6
3	5	0.34825	17.229	0.0465183	22.972	34.458	31.5865	0.08695	8	12
3	5	0.20435	19.5743	0.0291167	34.255	24.4678	14.6807	0.0141	7	5
3	5	0.24665	16.2173	0.0385161	32.4346	28.3803	12.163	0.22685	8	7
3	5	0.27915	17.9115	0.150636	39.4053	25.0761	10.7469	0.03025	11	7
3	5	0.265	11.3208	0.00188679	60.3774	33.9623	52.8302	0.00505	16	9
3	5	0.75815	14.509	0.0529579	35.613	27.699	31.656	0.0063	27	21
3	5	0.72305	16.5964	0.0683908	30.4267	24.8945	19.3624	0.062	22	18
3	5	0.5017	15.9458	0.096472	31.8916	13.9526	31.8916	0.0006	16	7
3	5	0.33465	26.8938	0.160018	23.9056	20.9174	23.9056	0.0049	8	7
3	5	0.32575	15.3492	0.134305	30.6984	21.4889	39.9079	0.01865	10	7
3	5	0.39605	20.1995	0.179397	35.3491	35.3491	35.3491	0.0138	14	14
3	5	0.2825	28.3186	0.0615929	38.9381	17.6991	17.6991	0.03565	11	5
3	5	0.4663	23.59	0.0833155	25.7345	21.4454	42.8908	0.08465	12	10
3	5	0.6639	18.075	0.172842	37.6563	18.075	24.1	0.0746	25	12
3	5	0.15615	19.2123	0.0634006	6.4041	38.4246	25.6164	0.00765	1	6
3	5	0.431	13.9211	0.114849	16.2413	16.2413	53.3643	0.01995	7	7
3	5	0.4189	16.7104	0.0895202	35.8081	26.2593	19.0976	0.11405	15	11
3	5	0.311	28.9389	0.187621	38.5852	19.2926	22.508	0.07705	12	6
3	5	0.2568	15.5763	0.0449766	38.9408	35.0467	11.6822	0.0045	10	9
3	5	0.47315	21.1349	0.131988	35.9294	16.908	21.1349	0.0513	17	8
3	5	0.4021	19.8955	0.168366	39.7911	22.3825	24.8694	0.04795	16	9
3	5	0.5197	15.3935	0.0880316	28.8628	15.3935	32.7112	0.03005	15	8
3	5	0.5254	19.0331	0.18129	17.1298	30.453	41.8729	0.0127	9	16
3	5	0.4205	16.6468	0.060761	28.5375	23.7812	23.7812	0.0109	12	10
3	5	0.3231	12.3801	0.0386877	24.7601	24.7601	18.5701	0.0319	8	8
3	5	0.18485	16.2294	0.052475	43.2783	32.4588	21.6392	0.0119	8	6
3	5	0.3383	17.7357	0.0233521	32.5155	32.5155	20.6917	0.0116	11	11
3	5	0.32875	18.251	0.0170342	24.3346	30.4183	30.4183	0.01755	8	10
3	5	0.1817	22.0143	0.0726472	44.0286	16.5107	33.0215	0.03375	8	3
3	5	0.11445	26.2123	0.071647	17.4749	17.4749	17.4749	0.0365	2	2
3	5	0.4252	11.7592	0.0129351	14.111	21.1665	25.8702	0.01	6	9
3	5	0.85805	6.9926	0.0267467	25.6395	29.1358	32.6321	0.00395	22	25
3	5	0.41655	12.0034	0.0601368	36.0101	21.606	38.4108	0.00435	15	9
3	5	0.1712	23.3645	0.0119743	5.84112	29.2056	11.6822	0.08395	1	5
3	5	0.28715	24.3775	0.109351	13.93	20.895	27.86	0.07685	4	6
3	5	0.1028	38.9105	0.130837	29.1829	29.1829	58.3658	0.01735	3	3
3	5	0.62975	9.52759	0.0296943	15.8793	39.6983	26.9948	0.04095	10	25
3	5	0.46185	10.826	0.024142	17.3216	19.4868	28.1477	0.05705	8	9
3	5	0.38985	7.69527	0.00102604	17.9556	15.3905	28.216	0.0265	7	6
3	5	0.2955	16.9205	0.0680203	33.8409	23.6887	20.3046	0.03265	10	7
3	5	0.4729	10.5731	0.0342567	16.9169	16.9169	25.3753	0.0512	8	8
3	5	0.487	12.3203	0.0713552	22.5873	24.6407	22.5873	0.0041	11	12
3	5	0.3373	17.7883	0.0674474	20.753	41.5061	35.5766	0.00775	7	14
3	5	0.29475	16.9635	0.0454623	30.5344	13.5708	3.39271	0.1853	9	4
3	5	0.2959	13.5181	0.0615073	16.8976	13.5181	33.7952	0.0294	5	4
3	5	0.35705	11.2029	0.0259067	22.4058	30.808	25.2066	0.0051	8	11
3	5	0.27065	11.0844	0.0110844	22.1689	29.5585	11.0844	0.0342	6	8
3	5	0.2415	12.4224	0.0325052	20.7039	28.9855	16.5631	0.07935	5	7
3	5	0.41015	14.6288	0.0680239	26.8195	19.5051	21.9432	0.01755	11	8
3	5	0.2678	14.9365	0.0724421	26.1389	18.6706	41.0754	0.04495	7	5
3	5	1.14655	11.3384	0.0365008	33.1429	25.2933	25.2933	0.01625	38	29
3	5	0.30175	13.256	0.0122618	33.14	23.198	16.57	0.01155	10	7
3	5	0.27205	22.0548	0.0575262	14.7032	25.7306	18.379	0.02675	4	7
3	5	0.3185	18.8383	0.0695447	15.6986	21.978	34.5369	0.01795	5	7
3	5	0.2119	14.1576	0.0257197	28.3152	37.7537	18.8768	0.0775	6	8
3	5	0.7977	20.0577	0.141156	28.8329	33.8473	18.8041	0.04105	23	27
3	5	0.36425	19.2176	0.136719	19.2176	19.2176	24.7083	0.0723	7	7
3	5	0.2033	19.6754	0.0693556	24.5942	34.4319	14.7565	0.00575	5	7
3	5	0.36535	30.1081	0.303271	24.6339	24.6339	24.6339	0.0368	9	9
3	5	0.35205	25.5646	0.209061	25.5646	22.724	28.4051	0.0659	9	8
3	5	0.31555	34.8598	0.18856	31.6907	15.8453	19.0144	0.0162	10	5
3	5	0.45635	21.913	0.228662	17.5304	30.6782	19.7217	0.0445	8	14
3	5	0.4121	21.8394	0.123271	26.6926	26.6926	26.6926	0.00885	11	11
3	5	0.1995	35.0877	0.114035	15.0376	25.0627	45.1128	0.0114	3	5
3	5	0.0658	45.5927	0.0174772	30.3951	30.3951	45.5927	0.02955	2	2
3	5	0.5032	21.8601	0.144376	19.8728	15.8983	19.8728	0.06965	10	8
3	5	0.36315	27.5368	0.161366	30.2905	16.5221	24.7831	0.0072	11	6
3	5	0.3504	11.4155	0.0342466	22.8311	25.6849	25.6849	0.0208	8	9
3	5	0.6063	18.1428	0.11999	24.7402	19.7922	24.7402	0.0158	15	12
3	5	0.46295	17.2805	0.102711	28.0808	17.2805	21.6006	0.02735	13	8
3	5	0.414	21.7391	0.214855	21.7391	14.4928	14.4928	0.09915	9	6
3	5	0.3946	25.3421	0.0965535	20.2737	17.7395	25.3421	0.0029	8	7
3	5	0.88635	9.02578	0.0237491	20.308	14.6669	20.308	0.07935	18	13
3	5	0.47615	8.40071	0.012076	16.8014	25.2021	29.4025	0.0176	8	12
3	5	0.45325	19.8566	0.198235	28.6817	28.6817	26.4755	0.01455	13	13
3	5	0.62125	14.4869	0.109698	28.9738	22.5352	28.9738	0.08515	18	14
3	5	0.2829	17.6741	0.0567338	38.883	21.2089	28.2785	0.0066	11	6
3	5	0.4393	15.9344	0.110631	18.2108	27.3162	34.1452	0.08505	8	12
3	5	0.35885	30.6535	0.257768	39.0135	13.9334	30.6535	0.016	14	5
3	5	0.9834	13.2194	0.112111	24.4051	24.4051	20.3376	0.0125	24	24
3	5	0.34985	20.0086	0.0581678	20.0086	22.8669	20.0086	0.01965	7	8
3	5	0.48925	20.4394	0.108227	22.4834	24.5273	28.6152	0.0159	11	12
3	5	1.00465	16.9213	0.10118	25.8797	13.9352	24.8843	0.0068	26	14
3	5	0.69605	18.6768	0.100208	24.4235	22.9869	20.1135	0.02045	17	16
3	5	0.7237	19.345	0.169407	23.4904	23.4904	17.9632	0.08045	17	17
3	5	0.4109	24.3368	0.156607	24.3368	26.7705	38.9389	0.0409	10	11
3	5	0.36935	24.3671	0.144714	35.197	27.0746	40.6119	0.01315	13	10
3	5	0.4119	24.2777	0.157927	48.5555	29.1333	24.2777	0.0804	20	12
3	5	0.4671	17.127	0.0880968	34.2539	29.9722	27.8313	0.0034	16	14
3	5	0.2477	16.1486	0.0662091	16.1486	32.2971	20.1857	0.03195	4	8
3	5	0.28705	20.9023	0.140219	31.3534	38.3209	24.386	0.0171	9	11
3	5	0.2206	22.6655	0.0981414	40.7978	9.06618	18.1324	0.029	9	2
3	5	1.0379	16.3792	0.121206	25.0506	24.0871	17.3427	0.13515	26	25
3	5	0.7263	15.1453	0.0782734	24.7831	17.8989	20.6526	0.00175	18	13
3	5	0.3666	21.8221	0.128205	27.2777	19.0944	21.8221	0.04485	10	7
3	5	0.6162	21.097	0.123742	22.7199	22.7199	30.8341	0.0035	14	14
3	5	0.17425	28.6944	0.236729	22.9555	34.4333	40.1722	0.0089	4	6
3	5	0.40985	21.9593	0.149323	21.9593	12.1996	26.8391	0.0528	9	5
3	5	0.289	27.6817	0.134948	27.6817	20.7612	20.7612	0.0954	8	6
3	5	0.44515	24.7108	0.165674	15.725	15.725	15.725	0.02875	7	7
3	5	0.55675	23.3498	0.150965	16.1652	14.3691	17.9614	0.0225	9	8
3	5	0.23385	21.3812	0.171264	21.3812	12.8287	4.27625	0.1948	5	3
3	5	0.2423	12.3813	0.00639703	4.12712	16.5085	16.5085	0.0037	1	4
3	5	0.6482	16.9701	0.0574668	10.7991	20.0555	20.0555	0.07435	7	13
3	5	1.0815	16.6436	0.093435	14.7943	21.2668	16.6436	0.11125	16	23
3	5	0.41225	16.98	0.0718011	14.5543	16.98	21.8314	0.03465	6	7
3	5	0.2338	17.1086	0.00320787	12.8315	34.2173	25.663	0.0334	3	8
3	5	0.14355	27.8649	0.0442355	20.8986	6.96621	34.8311	0.00675	3	1
3	5	0.15885	18.8857	0.0100724	44.0667	37.7715	25.181	0.05925	7	6
3	5	0.939	14.9095	0.0716187	28.754	26.6241	24.4941	0.00605	27	25
3	5	0.3108	25.74	0.0540541	22.5225	19.305	19.305	0.0458	7	6
3	5	0.35295	14.1663	0.0429239	25.4994	22.6661	22.6661	0.011	9	8
3	5	1.23465	12.9591	0.0783218	23.4884	23.4884	18.6288	0	29	29
3	5	0.24595	12.1976	0.00284611	16.2635	28.4611	12.1976	0.03415	4	7
3	5	0.45335	15.4406	0.0732326	19.8522	22.058	22.058	0.04355	9	10
3	5	0.98685	11.1466	0.100725	21.2798	22.2932	25.3331	0.0342	21	22
3	5	1.32215	10.5888	0.0535491	24.203	30.2538	22.6903	0.05055	32	40
3	5	0.05	60	0.127	20	60	20	0.0356	1	3
3	5	0.2454	24.4499	0.0817033	8.14996	24.4499	24.4499	0.0401	2	6
3	5	0.48395	12.398	0.0376072	24.7959	20.6633	20.6633	0.0166	12	10
3	5	0.5811	12.0461	0.0557563	24.0922	18.9296	30.9757	0.0666	14	11
3	5	0.21895	18.269	0.123544	27.4035	41.1053	27.4035	0.02425	6	9
3	5	0.31645	15.8003	0.0401327	25.2805	25.2805	18.9603	0.06335	8	8
3	5	0.2195	18.2232	0.0471526	18.2232	22.779	45.5581	0.02505	4	5
3	5	1.10855	10.825	0.0853818	24.3561	24.3561	19.8457	0.09685	27	27
3	5	0.41315	14.5226	0.0413893	19.3634	19.3634	19.3634	0.0627	8	8
3	5	0.90395	15.4876	0.0540959	16.5938	19.9126	27.6564	0.06935	15	18
3	5	0.62455	12.8092	0.0470739	16.0115	30.4219	24.0173	0.0077	10	19
3	5	0.8108	13.5668	0.0996547	32.0671	18.5002	23.4336	0.03325	26	15
3	5	0.46125	15.1762	0.0289431	19.5122	17.3442	19.5122	0.0167	9	8
3	5	0.6522	9.19963	0.0350353	16.866	22.9991	22.9991	0.0108	11	15
3	5	0.757	15.852	0.0570013	23.7781	21.1361	23.7781	0.02835	18	16
3	5	1.08435	13.8332	0.0504911	23.9775	23.0553	23.0553	0.09875	26	25
3	5	1.54895	11.6208	0.06088	21.9504	23.8871	24.5327	0.0164	34	37
3	5	0.57375	17.4292	0.194423	24.4009	24.4009	26.1438	0.0327	14	14
3	5	0.1347	22.2717	0.00519673	14.8478	29.6956	14.8478	0.04865	2	4
3	5	0.39385	10.1562	0.0200584	20.3123	15.2342	22.8513	0.0026	8	6
3	5	0.94715	11.6138	0.0362139	17.9486	17.9486	11.6138	0.0003	17	17
3	5	0.5648	15.9348	0.0586933	10.6232	10.6232	23.017	0.0568	6	6
3	5	0.2665	15.0094	0.0491557	11.257	33.7711	30.0188	0.05595	3	9
3	5	1.65455	13.9011	0.0604092	22.3626	25.9889	23.5714	0.0053	37	43
3	5	0.19555	20.4551	0.0299156	35.7965	15.3413	30.6827	0.03845	7	3
3	5	0.1995	15.0376	0.0947368	20.0501	25.0627	5.01253	0.03415	4	5
3	5	1.4978	15.3559	0.0758112	20.0294	26.7058	24.0353	0.0298	30	40
3	5	1.3887	13.6819	0.0969612	21.6029	27.3637	24.4833	0.0121	30	38
3	5	0.44875	11.1421	0.0994986	22.2841	20.0557	20.0557	0.19655	10	9
3	5	0.16805	23.8024	0.0606962	29.753	29.753	65.4567	0.0059	5	5
3	5	0.16695	17.9695	0.0401318	41.9287	17.9695	29.9491	0.00615	7	3
3	5	0.20135	14.8994	0.0173827	29.7989	29.7989	29.7989	0.0489	6	6
3	5	1.0701	11.2139	0.116484	28.9693	26.1658	28.9693	0.011	31	28
3	5	0.2987	16.7392	0.0758286	26.7827	26.7827	20.087	0.1323	8	8
3	5	0.35155	11.3782	0.0560375	25.6009	28.4455	25.6009	0.0314	9	10
3	5	0.23395	21.3721	0.0376149	25.6465	38.4698	25.6465	0.01895	6	9
3	5	0.44705	15.6582	0.049547	33.5533	29.0795	17.8951	0.037	15	13
3	5	1.06075	11.3128	0.0457695	28.2819	28.2819	24.511	0.00965	30	30
3	5	0.7932	12.6072	0.0667549	27.7358	23.9536	31.5179	0.095	22	19
3	5	0.84945	12.9496	0.0841721	24.7219	32.9625	38.8487	0.04385	21	28
3	5	0.8222	12.1625	0.103016	38.92	41.3525	30.4062	0.0611	32	34
3	5	0.76455	14.3875	0.0632398	31.391	28.7751	30.0831	0.01335	24	22
3	5	0.85625	11.6788	0.0510949	25.6934	31.5328	40.8759	0.0546	22	27
3	5	0.6583	13.6716	0.074738	30.3813	37.9766	37.9766	0.02185	20	25
3	5	0.4825	18.6528	0.086943	33.1606	33.1606	31.0881	0.0196	16	16
3	5	0.7156	16.7691	0.0491895	33.5383	30.7434	32.1409	0.0123	24	22
3	5	0.89375	16.7832	0.104448	36.9231	29.0909	35.8042	0.046	33	26
3	5	0.59385	10.1036	0.0661783	33.6785	31.9946	33.6785	0.01295	20	19
3	5	1.84715	12.993	0.0656146	31.3997	30.317	32.4825	0.0206	58	56
3	5	0.5339	11.2381	0.0438284	29.9682	37.4602	33.7142	0.0087	16	20
3	5	1.1227	12.4699	0.0711232	37.4098	20.4863	29.3934	0.0591	42	23
3	5	0.12535	23.933	0.115676	15.9553	23.933	15.9553	0.0039	2	3
3	5	0.38625	12.945	0.0513916	41.4239	28.479	36.246	0.0032	16	11
3	5	0.969	18.5759	0.135655	31.9917	33.0237	28.8958	0.0003	31	32
3	5	0.63255	22.1326	0.214133	47.4271	26.8753	36.3608	0.0469	30	17
3	5	0.0894	44.7427	0.165548	33.557	11.1857	67.1141	0.0016	3	1
3	5	0.314	19.1083	0.0450637	41.4013	44.586	25.4777	0.0594	13	14
3	5	0.39525	10.1202	0.029728	40.4807	27.8305	32.8906	0.00255	16	11
3	5	0.4242	14.1443	0.0731966	30.6459	33.0033	28.2885	0.00835	13	14
3	5	0.2374	12.6369	0.0389638	37.9107	21.0615	33.6984	0.01275	9	5
3	5	0.67545	10.3635	0.0165815	28.1294	17.7659	29.6099	0.00705	19	12
3	5	0.49075	12.2262	0.0419766	14.2639	34.6409	44.8293	0.03565	7	17
3	5	1.09905	13.6482	0.103908	34.5753	35.4852	30.9358	0.00285	38	39
3	5	0.2543	19.6618	0.0896579	19.6618	27.5265	39.3236	0.08025	5	7
3	5	0.31565	12.6723	0.05655	34.8487	34.8487	38.0168	0.0018	11	11
3	5	0.79225	11.3601	0.0508047	34.0802	27.769	37.8668	0.00465	27	22
3	5	0.27315	10.983	0.0274574	25.6269	47.5929	36.6099	0.02035	7	13
3	5	0.36455	13.7155	0.0395008	41.1466	38.4035	30.1742	0.01645	15	14
3	5	0.1827	16.4204	0.0205255	16.4204	38.3142	16.4204	0.0288	3	7
3	5	1.05635	14.1998	0.0569887	30.293	35.9729	35.0263	0.01165	32	38
3	5	0.59565	15.1095	0.0933434	41.971	30.2191	55.4017	0.00345	25	18
3	5	0.96365	17.6413	0.102527	40.4711	40.4711	34.2448	0.0177	39	39
3	5	0.73755	13.5584	0.041082	32.5402	32.5402	36.6077	0.0309	24	24
3	5	1.1372	20.2251	0.0971245	33.4154	30.7773	25.5012	0.00685	38	35
3	5	0.285	17.5439	0.0629825	21.0526	21.0526	28.0702	0.0212	6	6
3	5	0.26945	11.1338	0.00686584	25.9788	55.669	18.5563	0.0424	7	15
3	5	1.9729	14.1923	0.0791474	28.3846	27.3709	35.9876	0.0198	56	54
3	5	0.92115	13.0272	0.0676329	29.3112	39.0816	34.7392	0.0265	27	36
3	5	0.99375	13.0818	0.0737107	41.2579	26.1635	30.1887	0.01535	41	26
3	5	0.35495	14.0865	0.043809	16.9038	42.2595	36.6249	0.0187	6	15
3	5	0.16515	18.1653	0.0214956	30.2755	42.3857	42.3857	0.02895	5	7
3	5	0.74105	12.1449	0.0777275	37.7842	33.7359	40.4831	0.0298	28	25
3	5	0.2832	17.6554	0.127648	52.9661	42.3729	31.7797	0.0406	15	12
3	5	0.4933	16.2173	0.0642611	38.5161	28.3803	36.489	0.01755	19	14
3	5	1.13215	17.6655	0.110586	32.6812	37.9808	28.2648	0.0219	37	43
3	5	0.91325	12.0449	0.0513551	28.4698	31.7547	29.5647	0.002	26	29
3	5	0.26655	15.0066	0.0992309	30.0131	30.0131	18.7582	0.08555	8	8
3	5	0.86455	13.8801	0.0812561	28.9168	38.1701	31.2301	0.0801	25	33
3	5	0.91405	13.1284	0.0989005	31.7269	33.915	36.1031	0.03085	29	31
3	5	0.44065	18.155	0.0620674	34.0406	36.31	45.3875	0.0163	15	16
3	5	0.54585	18.3201	0.0281213	38.4721	27.4801	31.1441	0.0131	21	15
3	5	0.54735	12.7889	0.0791998	31.0587	43.8476	43.8476	0.00675	17	24
3	5	0.24745	16.1649	0.0202061	16.1649	32.3298	48.4946	0.02185	4	8
3	5	0.6193	16.1473	0.0592605	37.1387	40.3682	35.524	0.0661	23	25
3	5	0.27935	25.0582	0.124396	42.9569	32.2176	42.9569	0.05575	12	9
3	5	1.5279	13.0899	0.0570718	34.0336	39.2696	37.3061	0.0005	52	60
3	5	0.6859	11.6635	0.0774894	37.9064	34.9905	37.9064	0.028	26	24
3	5	0.61435	11.3942	0.0726784	34.1825	32.5547	24.416	0.0089	21	20
3	5	1.4377	12.52	0.0792585	29.9089	29.9089	20.1711	0.135	43	43
3	5	0.83815	20.2828	0.0913321	28.6345	17.8966	26.2483	0.10255	24	15
3	5	1.50395	13.2983	0.0880348	22.6071	29.2563	28.5914	0.0536	34	44
3	5	0.49145	20.3479	0.11405	26.4523	34.5915	26.4523	0.0053	13	17
3	5	0.8103	17.2776	0.0950882	32.0869	25.9163	22.214	0.0294	26	21
3	5	0.37515	18.6592	0.147541	31.9872	29.3216	13.328	0.1106	12	11
3	5	2.67095	11.232	0.061963	26.2079	35.9423	15.7247	0.0136	70	96
3	5	0.31985	12.5059	0.0983273	37.5176	21.8853	18.7588	0.0402	12	7
3	5	0.25025	11.988	0.0351648	23.976	15.984	19.98	0.0819	6	4
2	6	0.21645	23.1	0.130284	23.1	18.48	0	0.1485	5	4
2	6	0.10415	28.8046	0.0638502	28.8046	9.60154	0	0.1542	3	1
2	6	0.20105	19.8955	0.106192	14.9217	4.97389	4.97389	0.12565	3	1
2	6	0.14195	28.1789	0.110955	14.0895	21.1342	7.04473	0.12285	2	3
2	6	0.15615	25.6164	0.107589	19.2123	12.8082	0	0.347	3	2
2	6	0.15255	26.2209	0.0871845	26.2209	6.55523	13.1105	0.02975	4	1
2	6	0.1796	22.2717	0.0999443	11.1359	11.1359	0	0.25405	2	2
2	6	0.40165	14.9384	0.0639861	12.4486	7.46919	22.4076	0.00345	5	3
2	6	0.15735	25.421	0.170639	19.0658	19.0658	6.35526	0.1252	3	3
2	6	0.1248	32.0513	0.24399	24.0385	8.01282	16.0256	0.00345	3	1
2	6	0.2333	17.1453	0.0443635	17.1453	8.57265	12.859	0.115	4	2
2	6	0.16435	24.3383	0.0851841	30.4229	30.4229	12.1692	0.09025	5	5
2	6	0.35665	14.0193	0.0419178	19.6271	14.0193	36.4503	0.04995	7	5
2	6	0.3644	13.7212	0.095225	32.9308	13.7212	30.1866	0.0473	12	5
2	6	0.2208	22.6449	0.109375	36.2319	27.1739	27.1739	0.0852	8	6
2	6	0.11305	26.5369	0.0672269	26.5369	0	8.84564	0.0547	3	0
2	6	0.1044	28.7356	0.0454981	9.57854	9.57854	9.57854	0.07235	1	1
2	6	0.1123	26.7142	0.0601069	44.5236	0	17.8094	0.0483	5	0
2	6	0.11635	25.7843	0.115599	17.1895	25.7843	17.1895	0.01005	2	3
2	6	0.17165	23.3032	0.116807	23.3032	11.6516	23.3032	0.01165	4	2
2	6	0.11365	26.3968	0.0448746	17.5979	26.3968	17.5979	0.02695	2	3
2	6	0.3488	14.3349	0.0587729	34.4037	2.86697	20.0688	0.0364	12	1
2	6	0.2455	24.4399	0.0855397	32.5866	16.2933	24.4399	0.08035	8	4
2	6	0.11815	33.8553	0.0749048	8.46382	16.9276	16.9276	0.0782	1	2
2	6	0.10485	28.6123	0.0677158	38.1497	19.0749	0	0.11295	4	2
2	6	0.2968	16.8464	0.0594677	23.5849	13.4771	10.1078	0.1491	7	4
2	6	0.31405	12.7368	0.0447381	28.6579	15.921	19.1052	0.11935	9	5
2	6	0.16775	17.8838	0.0459016	23.845	17.8838	11.9225	0.04025	4	3
2	6	0.16455	30.3859	0.108174	30.3859	6.07718	24.3087	0.055	5	1
2	6	0.1514	26.4201	0.0980845	19.8151	13.21	0	0.29845	3	2
2	6	0.1507	26.5428	0.10783	33.1785	0	19.9071	0.00495	5	0
2	6	0.43925	13.6596	0.0379055	11.383	13.6596	11.383	0.18445	5	6
2	6	0.1091	27.4977	0.0444546	0	0	9.1659	0.10735	0	0
2	6	0.21315	23.4577	0.0872625	28.1492	0	9.38306	0.08615	6	0
2	6	0.11545	25.9853	0.0814205	0	8.66176	0	0.3653	0	1
2	6	0.18685	16.0557	0.0417447	10.7038	5.35189	10.7038	0.16055	2	1
2	6	0.117	34.188	0.0854701	25.641	8.54701	25.641	0.08385	3	1
2	6	0.5351	11.2129	0.0656887	16.8193	13.0817	22.4257	0.0278	9	7
2	6	0.162	24.6914	0.0700617	30.8642	18.5185	30.8642	0.0831	5	3
2	6	0.18375	21.7687	0.148027	16.3265	0	5.44218	0.03815	3	0
2	6	0.09265	32.3799	0.0895845	10.7933	10.7933	0	0.19945	1	1
2	6	0.1614	24.7831	0.113693	6.19579	12.3916	18.5874	0.0185	1	2
2	6	0.34115	14.6563	0.0663931	14.6563	2.93126	8.79379	0.08065	5	1
2	6	0.2486	16.0901	0.0641593	4.02253	8.04505	12.0676	0.01905	1	2
2	6	0.3871	12.9166	0.0446913	15.4999	12.9166	18.0832	0.1214	6	5
2	6	0.17255	17.3863	0.0756303	23.1817	28.9771	23.1817	0.0082	4	5
2	6	0.11075	36.1174	0.0568849	27.088	18.0587	0	0.11515	3	2
2	6	0.11415	26.2812	0.0919842	17.5208	8.7604	8.7604	0.092	2	1
2	6	0.1663	24.0529	0.137703	36.0794	6.01323	6.01323	0.0108	6	1
2	6	0.1899	21.0637	0.0787256	5.26593	5.26593	0	0.2121	1	1
2	6	0.23955	12.5235	0.0233772	25.047	4.17449	12.5235	0.00385	6	1
2	6	0.16505	24.2351	0.0799758	6.05877	6.05877	6.05877	0.0088	1	1
2	6	0.11195	26.7977	0.073247	8.93256	0	0	0.2786	1	0
2	6	0.06805	44.0852	0.0124908	14.6951	29.3902	0	0.2791	1	2
2	6	0.11825	25.37	0.0718816	0	8.45666	0	0.21645	0	1
2	6	0.1105	27.1493	0.0678733	0	9.04977	0	0.11125	0	1
2	6	0.24575	12.2075	0.00223805	28.4842	8.13835	8.13835	0.0484	7	2
2	6	0.11235	26.7023	0.17312	17.8015	8.90076	0	0.3496	2	1
2	6	0.111	27.027	0.0630631	0	9.00901	9.00901	0.0205	0	1
2	6	0.28445	14.0622	0.0311127	3.51556	14.0622	10.5467	0.1397	1	4
2	6	0.11495	26.0983	0.0361027	17.3989	0	0	0.2188	2	0
2	6	0.3178	15.7332	0.0921963	12.5865	3.14663	18.8798	0.0366	4	1
2	6	0.1113	26.9542	0.0880503	8.98473	0	0	0.1637	1	0
2	6	0.22055	22.6706	0.112673	18.1365	4.53412	13.6024	0.15265	4	1
2	6	0.1212	24.7525	0.00618812	8.25083	24.7525	8.25083	0.09575	1	3
2	6	0.1178	25.4669	0.0831919	25.4669	8.48896	16.9779	0.1073	3	1
2	6	0.10295	29.1404	0.077222	19.4269	19.4269	9.71345	0.03555	2	2
2	6	0.10055	29.8359	0.0890104	19.8906	9.9453	9.9453	0.0763	2	1
2	6	0.1084	27.6753	0.0811808	9.22509	0	0	0.18015	1	0
2	6	0.17215	23.2356	0.196921	11.6178	5.80889	5.80889	0.14	2	1
2	6	0.1093	27.4474	0.120769	18.2983	0	9.14913	0.00055	2	0
2	6	0.1122	26.738	0.0445633	17.8253	0	8.91266	0.0276	2	0
2	6	0.1117	26.8577	0.0886303	8.95255	0	17.9051	0.01345	1	0
2	6	0.18085	22.1178	0.109483	0	0	16.5883	0.0539	0	0
2	6	0.176	22.7273	0.107386	22.7273	5.68182	28.4091	5e-05	4	1
2	6	0.11315	26.5135	0.0503756	0	0	0	0.3716	0	0
2	6	0.16765	23.8592	0.125559	11.9296	0	11.9296	0.0399	2	0
2	6	0.0997	30.0903	0.114845	0	0	0	0.10775	0	0
2	6	0.17935	22.3028	0.044048	22.3028	16.7271	5.57569	0.16335	4	3
2	6	0.11585	25.8956	0.149763	17.2637	8.63185	0	0.18695	2	1
2	6	0.11755	25.5211	0.0880476	8.50702	0	25.5211	0.0335	1	0
2	6	0.0955	41.8848	0.0842932	0	20.9424	0	0.15055	0	2
2	6	0.27915	14.3292	0.0648397	10.7469	3.5823	10.7469	0.0121	3	1
2	6	0.29155	13.7198	0.0173212	6.85989	3.42994	10.2898	0.16585	2	1
2	6	0.24655	20.2799	0.0831474	16.2239	12.1679	8.11194	0.0219	4	3
2	6	0.1358	22.0913	0.0452872	14.7275	0	0	0.19835	2	0
2	6	0.1068	28.0899	0.10206	18.7266	9.3633	0	0.2706	2	1
2	6	0.10575	28.3688	0.0595745	9.45626	18.9125	0	0.12075	1	2
2	6	0.26235	11.4351	0.00362112	3.8117	22.8702	7.6234	0.01875	1	6
2	6	0.108	27.7778	0.087963	9.25926	0	18.5185	0.0721	1	0
2	6	0.1073	27.959	0.0778192	18.6393	18.6393	0	0.14	2	2
2	6	0.1109	27.0514	0.0432822	0	9.01713	9.01713	0.10335	0	1
2	6	0.11095	27.0392	0.0838215	27.0392	0	18.0261	0.00485	3	0
2	6	0.457	15.3173	0.0736324	19.6937	26.2582	21.8818	0.1044	9	12
2	6	0.24075	16.6147	0.0606438	41.5369	4.15369	4.15369	0.0108	10	1
2	6	0.14955	26.7469	0.0558342	26.7469	13.3735	13.3735	0.04465	4	2
2	6	0.16305	24.5324	0.0680773	30.6654	0	12.2662	0.07625	5	0
2	6	0.1053	28.49	0.167616	9.49668	9.49668	9.49668	0.05545	1	1
2	6	0.11355	26.4201	0.0409511	8.80669	8.80669	17.6134	0.0777	1	1
2	6	0.15325	26.1011	0.161827	26.1011	6.52529	6.52529	0.1174	4	1
2	6	0.10265	29.2255	0.0506576	9.74184	29.2255	9.74184	0.0021	1	3
2	6	0.1005	29.8507	0.00447761	39.801	19.9005	0	0.1084	4	2
2	6	0.1081	27.7521	0.0476411	9.25069	9.25069	18.5014	0.0172	1	1
2	6	0.11465	26.1666	0.0641082	34.8888	8.7222	17.4444	0.02345	4	1
2	6	0.11195	26.7977	0.0464493	17.8651	0	0	0.13765	2	0
2	6	0.12075	41.4079	0.144513	16.5631	8.28157	0	0.16125	2	1
2	6	0.2775	18.018	0.0805405	18.018	18.018	18.018	0.08865	5	5
2	6	0.1662	24.0674	0.0968712	18.0505	18.0505	18.0505	0.0442	3	3
2	6	0.1607	24.8911	0.15308	37.3367	18.6683	18.6683	0.02915	6	3
2	6	0.21005	23.8039	0.0564151	28.5646	4.76077	14.2823	0.02155	6	1
2	6	0.19715	25.3614	0.186406	20.2891	10.1446	20.2891	0.0702	4	2
2	6	0.0951	31.5457	0.0946372	21.0305	0	42.061	0.01125	2	0
2	6	0.11475	26.1438	0.0588235	34.8584	8.7146	17.4292	0.02555	4	1
2	6	0.2172	23.0203	0.052256	18.4162	4.60405	9.2081	0.16185	4	1
2	6	0.1076	27.881	0.0715613	0	0	9.29368	0.0012	0	0
2	6	0.1197	25.0627	0.0438596	0	0	8.35422	0.0456	0	0
2	6	0.1487	20.1748	0.00403497	13.4499	6.72495	6.72495	0.05645	2	1
2	6	0.1013	29.615	0.0261599	19.7433	9.87167	0	0.15955	2	1
2	6	0.2629	11.4112	0.017307	22.8224	22.8224	22.8224	0.00175	6	6
2	6	0.3904	10.2459	0.0321465	30.7377	20.4918	23.0533	0.0247	12	8
2	6	0.11115	26.9906	0.108412	17.9937	17.9937	0	0.27805	2	2
2	6	0.1484	26.9542	0.0953504	33.6927	0	20.2156	0.02125	5	0
2	6	0.1126	26.643	0.0599467	8.88099	17.762	0	0.1323	1	2
2	6	0.1151	26.0643	0.0382276	17.3762	17.3762	26.0643	0.0032	2	2
2	6	0.1668	23.9808	0.0770384	23.9808	5.9952	11.9904	0.07275	4	1
2	6	0.14845	26.9451	0.171101	26.9451	6.73627	13.4725	0.01365	4	1
2	6	0.11045	27.1616	0.130828	54.3232	9.05387	9.05387	0.06	6	1
2	6	0.51465	11.6584	0.0629554	27.203	21.3737	13.6015	0.20005	14	11
2	6	0.16135	24.7908	0.16176	6.19771	0	18.5931	0.01185	1	0
2	6	0.16655	30.021	0.12789	24.0168	6.0042	18.0126	0.00145	4	1
2	6	0.1211	24.7729	0.0363336	0	8.25764	8.25764	0.0819	0	1
2	6	0.36895	13.552	0.114379	10.8416	13.552	21.6832	0.00685	4	5
2	6	0.1789	22.3589	0.126328	22.3589	11.1794	22.3589	0.01055	4	2
2	6	0.1055	28.436	0.0691943	0	18.9573	9.47867	0.08165	0	2
2	6	0.16565	24.1473	0.164202	30.1841	12.0736	6.03682	0.13165	5	2
2	6	0.1104	27.1739	0.084692	9.05797	0	9.05797	0.0006	1	0
2	6	0.09425	31.8302	0.0732095	10.6101	0	10.6101	0.0723	1	0
2	6	0.1084	27.6753	0.0576568	27.6753	9.22509	27.6753	0.00465	3	1
2	6	0.11285	26.584	0.0762074	17.7226	8.86132	44.3066	0.01535	2	1
2	6	0.21005	19.0431	0.0785527	19.0431	9.52154	14.2823	0.00055	4	2
2	6	0.2865	17.452	0.0397906	17.452	6.9808	27.9232	0.0653	5	2
2	6	0.0589	50.9338	0.150255	0	0	50.9338	0.03745	0	0
2	6	0.1899	21.0637	0.0179042	15.7978	10.5319	10.5319	0.0299	3	2
2	6	0.0971	30.896	0.0422245	10.2987	10.2987	0	0.1138	1	1
2	6	0.11615	25.8287	0.0581145	8.60956	0	25.8287	0.0127	1	0
2	6	0.1213	32.9761	0.126134	0	16.488	41.2201	0.07195	0	2
2	6	0.1816	27.533	0.0669053	22.0264	22.0264	11.0132	0.15055	4	4
2	6	0.1076	27.881	0.0622677	18.5874	0	0	0.1215	2	0
2	6	0.24925	16.0481	0.0457372	40.1204	8.02407	12.0361	0.06955	10	2
2	6	0.253	15.8103	0.00948617	11.8577	7.90514	15.8103	0.02745	3	2
2	6	0.11395	26.3273	0.0530935	43.8789	8.77578	0	0.39405	5	1
2	6	0.11335	26.4667	0.0074989	8.82223	8.82223	17.6445	0.0143	1	1
2	6	0.1083	27.7008	0.0350877	27.7008	27.7008	18.4672	0.0871	3	3
2	6	0.1072	27.9851	0.0471082	9.32836	9.32836	18.6567	0.03105	1	1
2	6	0.11645	25.7621	0.0601116	25.7621	0	8.58738	0.05025	3	0
2	6	0.33275	18.0316	0.0401202	15.0263	3.00526	6.01052	0.02	5	1
2	6	0.1486	26.9179	0.0457604	20.1884	20.1884	13.459	0.0927	3	3
2	6	0.239	20.9205	0.102092	8.3682	16.7364	25.1046	0.01105	2	4
2	6	0.24525	12.2324	0.0169215	8.15494	16.3099	12.2324	0.00625	2	4
2	6	0.1618	24.7219	0.0818912	6.18047	30.9023	24.7219	0.04855	1	5
2	6	0.2018	24.777	0.120664	4.9554	0	14.8662	0.14545	1	0
2	6	0.1628	30.7125	0.18059	6.14251	18.4275	0	0.25455	1	3
2	6	0.11275	26.6075	0.0363636	35.4767	17.7384	8.86918	0.07695	4	2
2	6	0.14955	26.7469	0.156804	46.8071	20.0602	0	0.2537	7	3
2	6	0.11465	26.1666	0.0815526	26.1666	0	0	0.2222	3	0
2	6	0.16145	24.7755	0.0257046	18.5816	6.19387	0	0.17295	3	1
2	6	0.1335	29.9625	0.144569	14.9813	7.49064	7.49064	0.11195	2	1
2	6	0.09655	31.072	0.0207147	10.3573	10.3573	10.3573	0.01925	1	1
2	6	0.1082	27.7264	0.0110906	0	9.24214	0	0.11305	0	1
2	6	0.1486	26.9179	0.0726783	20.1884	0	13.459	0.07485	3	0
2	6	0.25695	15.5672	0.0319128	11.6754	3.89181	15.5672	0.1597	3	1
2	6	0.0892	33.6323	0.05213	22.4215	0	22.4215	0.0489	2	0
2	6	0.10475	28.6396	0.00429594	9.54654	9.54654	38.1862	0.01415	1	1
2	6	0.09975	30.0752	0.0521303	10.0251	0	10.0251	0.02345	1	0
2	6	0.2266	26.4784	0.0823036	17.6523	4.41306	26.4784	0.0375	4	1
2	6	0.20195	24.7586	0.218866	19.8069	9.90344	4.95172	0.1486	4	2
2	6	0.16305	30.6654	0.147194	30.6654	30.6654	24.5324	0.02835	5	5
2	6	0.15765	19.0295	0.0196638	19.0295	38.059	12.6863	0.0242	3	6
2	6	0.24105	20.7426	0.0864966	12.4456	16.5941	8.29703	0.204	3	4
2	6	0.1748	22.8833	0.116133	40.0458	11.4416	22.8833	0.047	7	2
2	6	0.10745	27.92	0.0828292	9.30665	9.30665	9.30665	0.0366	1	1
2	6	0.31285	15.9821	0.101327	28.7678	31.9642	28.7678	0.0141	9	10
2	6	0.41745	9.58199	0.056893	26.3505	14.373	28.746	0.0351	11	6
2	6	0.18205	21.972	0.0823949	27.465	10.986	5.493	0.03785	5	2
2	6	0.23985	20.8464	0.0871378	8.33854	8.33854	12.5078	0.0693	2	2
2	6	0.3048	13.1234	0.023294	19.685	29.5276	22.9659	0.0301	6	9
2	6	0.10715	27.9981	0.0583294	9.33271	18.6654	0	0.1548	1	2
2	6	0.12955	23.1571	0.0602084	7.71903	38.5951	15.4381	0.00455	1	5
2	6	0.16855	23.7318	0.0139425	23.7318	17.7989	23.7318	0.02045	4	3
2	6	0.212	23.5849	0.143868	33.0189	23.5849	28.3019	0.00635	7	5
2	6	0.1798	22.2469	0.0597887	16.6852	22.2469	38.9321	0.01545	3	4
2	6	0.1536	26.0417	0.0572917	39.0625	6.51042	13.0208	0.01985	6	1
2	6	0.20135	19.8659	0.108766	39.7318	0	34.7653	0.0336	8	0
2	6	0.26135	15.3051	0.0734647	26.784	19.1314	19.1314	0.122	7	5
2	6	0.2453	20.3832	0.0334285	16.3066	8.15328	12.2299	0.0638	4	2
2	6	0.11895	25.2207	0.0533838	16.8138	16.8138	0	0.1329	2	2
2	6	0.16065	31.1236	0.121382	12.4494	6.22471	24.8988	0.02025	2	1
2	6	0.2148	23.2775	0.0574953	27.933	23.2775	32.5885	0.0123	6	5
2	6	0.1086	27.6243	0.0497238	0	9.2081	9.2081	0.0649	0	1
2	6	0.1545	25.89	0.0634304	12.945	6.47249	6.47249	0.13775	2	1
2	6	0.14965	26.729	0.0791848	46.7758	6.68226	20.0468	0.03865	7	1
2	6	0.18145	27.5558	0.0484982	5.51116	11.0223	16.5335	0.0643	1	2
2	6	0.1378	29.0276	0.126996	43.5414	7.25689	36.2845	0.0424	6	1
2	6	0.15975	25.0391	0.0713615	18.7793	12.5196	18.7793	0.01655	3	2
2	6	0.2176	18.3824	0.0282629	13.7868	4.59559	27.5735	0.09855	3	1
2	6	0.1548	25.8398	0.0736434	19.3798	19.3798	6.45995	0.14325	3	3
2	6	0.1033	29.0416	0.129719	9.68054	29.0416	0	0.162	1	3
2	6	0.1028	29.1829	0.0398833	19.4553	9.72763	9.72763	0.03195	2	1
2	6	0.0952	31.5126	0.042542	21.0084	10.5042	0	0.1261	2	1
2	6	0.18645	26.8168	0.069992	37.5436	21.4535	16.0901	0.0431	7	4
2	6	0.1558	25.6739	0.210526	12.837	0	6.41849	0.0464	2	0
2	6	0.107	28.0374	0.0995327	37.3832	9.34579	0	0.11415	4	1
2	6	0.21805	22.9305	0.0509058	32.1027	18.3444	22.9305	0.07455	7	4
2	6	0.3462	14.4425	0.090699	31.7735	14.4425	2.8885	0.10145	11	5
2	6	0.10615	37.6825	0.103627	0	0	0	0.10705	0	0
2	6	0.1042	28.7908	0.0465451	0	0	19.1939	0.04405	0	0
2	6	0.16165	24.7448	0.0906279	18.5586	6.1862	6.1862	0.0971	3	1
2	6	0.4366	13.7426	0.037563	18.3234	22.9043	29.7755	0.04185	8	10
2	6	0.1674	23.8949	0.078853	11.9474	11.9474	17.9211	0.07985	2	2
2	6	0.1017	29.4985	0.053589	9.83284	0	19.6657	0.0844	1	0
2	6	0.11245	26.6785	0.0551356	0	0	17.7857	0.01865	0	0
2	6	0.1631	24.5248	0.0652974	12.2624	24.5248	0	0.20245	2	4
2	6	0.1691	23.6546	0.0916617	5.91366	17.741	17.741	0.11075	1	3
2	6	0.1459	27.416	0.121659	13.708	6.85401	27.416	0.071	2	1
2	6	0.11005	27.2603	0.0649705	9.08678	36.3471	0	0.1902	1	4
2	6	0.1161	25.8398	0.0465116	25.8398	0	17.2265	0.01835	3	0
2	6	0.1644	24.3309	0.128041	6.08273	0	0	0.24805	1	0
2	6	0.1128	26.5957	0.0243794	8.86525	17.7305	8.86525	0.0257	1	2
2	6	0.28055	14.2577	0.0192479	21.3866	10.6933	32.0798	0.01405	6	3
2	6	0.1015	29.5567	0.107882	9.85222	0	0	0.11345	1	0
2	6	0.2607	15.3433	0.0373993	15.3433	11.5075	23.015	0.01965	4	3
2	6	0.1093	27.4474	0.0699909	18.2983	9.14913	0	0.15545	2	1
2	6	0.11615	25.8287	0.120103	8.60956	8.60956	0	0.1827	1	1
2	6	0.1045	28.7081	0.0473684	9.56938	28.7081	28.7081	0.01845	1	3
2	6	0.3956	15.1668	0.0548534	32.8615	12.639	20.2224	0.09695	13	5
2	6	0.1821	21.966	0.0464031	16.4745	0	5.49149	0.0146	3	0
2	6	0.1683	23.7671	0.142008	23.7671	5.94177	29.7089	0.0598	4	1
2	6	0.10475	28.6396	0.105012	9.54654	19.0931	28.6396	0.00625	1	2
2	6	0.16905	29.577	0.143744	17.7462	17.7462	17.7462	0.0053	3	3
2	6	0.1669	23.9664	0.158778	11.9832	11.9832	17.9748	0.05715	2	2
2	6	0.1599	25.0156	0.109443	25.0156	0	31.2695	0.00555	4	0
2	6	0.16295	24.5474	0.0699601	24.5474	0	30.6843	0.00755	4	0
2	6	0.0461	65.0759	0.0357918	21.692	0	43.3839	0.01805	1	0
2	6	0.1128	26.5957	0.0301418	35.461	17.7305	17.7305	0.00595	4	2
2	6	0.1137	26.3852	0.12577	43.9754	8.79507	8.79507	0.0485	5	1
2	6	0.1068	28.0899	0.106273	46.8165	18.7266	9.3633	0.0026	5	2
2	6	0.11455	34.9192	0.093409	8.72981	0	0	0.18765	1	0
2	6	0.10805	27.7649	0.0518279	18.5099	0	0	0.1565	2	0
2	6	0.0961	31.2175	0.0312175	41.6233	20.8117	0	0.11405	4	2
2	6	0.08415	47.5342	0.0540701	11.8835	0	0	0.14555	1	0
2	6	0.10025	29.9252	0.036409	9.97506	9.97506	0	0.25155	1	1
2	6	0.3146	15.8932	0.0325811	22.2505	15.8932	28.6078	0.0609	7	5
2	6	0.1082	27.7264	0.0314233	9.24214	0	9.24214	0.0424	1	0
2	6	0.09845	30.4723	0.0705942	10.1574	10.1574	20.3149	0.0888	1	1
2	6	0.18165	16.5153	0.0170658	11.0102	16.5153	16.5153	0.04745	2	3
2	6	0.2454	16.2999	0.0582722	24.4499	8.14996	12.2249	0.0834	6	2
2	6	0.0873	34.3643	0.0166094	0	11.4548	34.3643	0.01415	0	1
2	6	0.36	13.8889	0.0359722	22.2222	13.8889	22.2222	0.04355	8	5
2	6	0.1102	27.2232	0.0272232	9.07441	9.07441	18.1488	0.03435	1	1
2	6	0.1159	25.8844	0.00819672	8.62813	0	43.1406	0.00985	1	0
2	6	0.1443	20.79	0.0544006	6.93001	0	0	0.16395	1	0
2	6	0.10485	28.6123	0.0329041	9.53743	9.53743	0	0.1431	1	1
2	6	0.1686	23.7248	0.155101	17.7936	17.7936	29.656	0.104	3	3
2	6	0.10335	29.0276	0.0827286	29.0276	19.3517	9.67586	0.0918	3	2
2	6	0.1052	28.5171	0.00665399	9.5057	0	0	0.1879	1	0
2	6	0.1598	25.0313	0.089174	18.7735	18.7735	0	0.2632	3	3
2	6	0.3128	15.9847	0.0207801	6.39386	25.5754	12.7877	0.14475	2	8
2	6	0.22695	17.625	0.0251157	26.4375	8.81251	4.40626	0.04045	6	2
2	6	0.15975	25.0391	0.0463224	18.7793	18.7793	12.5196	0.06075	3	3
2	6	0.0557	53.86	0.016158	0	17.9533	17.9533	0.04555	0	1
2	6	0.1561	25.6246	0.13581	12.8123	0	19.2184	0.024	2	0
2	6	0.10775	27.8422	0.0645012	18.5615	9.28074	0	0.1929	2	1
2	6	0.10475	28.6396	0.0673031	28.6396	28.6396	19.0931	0.0228	3	3
2	6	0.16785	23.8308	0.0759607	17.8731	5.9577	11.9154	0.13565	3	1
2	6	0.32895	18.2399	0.0814713	12.1599	12.1599	18.2399	0.00725	4	4
2	6	0.0935	32.0856	0.0780749	64.1711	10.6952	10.6952	0.0391	6	1
2	6	0.1112	26.9784	0.0458633	8.99281	8.99281	17.9856	0.00405	1	1
2	6	0.17135	23.344	0.0323898	11.672	23.344	5.83601	0.0998	2	4
2	6	0.1137	26.3852	0.058927	26.3852	8.79507	0	0.24845	3	1
2	6	0.1082	27.7264	0.00924214	9.24214	9.24214	27.7264	0.05715	1	1
2	6	0.33565	14.8965	0.0388798	5.95859	20.8551	17.8758	0.05355	2	7
2	6	0.15215	26.2898	0.0177456	39.4348	13.1449	13.1449	0.053	6	2
2	6	0.1098	27.3224	0.0409836	18.2149	0	18.2149	0.0582	2	0
2	6	0.15545	32.1647	0.0231586	25.7317	6.43294	12.8659	0.03315	4	1
2	6	0.11225	26.7261	0.0160356	44.5434	17.8174	8.90869	0.1079	5	2
2	6	0.1685	23.7389	0.0982196	17.8042	5.93472	17.8042	0.13765	3	1
2	6	0.42385	9.4373	0.0425858	16.5153	21.2339	28.3119	0.0102	7	9
2	6	0.10815	27.7393	0.118816	9.24642	18.4928	27.7393	0.00725	1	2
2	6	0.32345	18.55	0.090895	15.4583	9.275	21.6417	0.0144	5	3
2	6	0.0669	44.843	0.109118	0	0	0	0.22925	0	0
2	6	0.11135	26.9421	0.00987876	8.98069	8.98069	26.9421	0.05485	1	1
2	6	0.1037	28.9296	0.0106075	0	0	19.2864	0.0651	0	0
2	6	0.11855	25.3058	0.00295234	16.8705	8.43526	8.43526	0.0533	2	1
2	6	0.16995	29.4204	0.0803177	17.6523	17.6523	17.6523	0.0252	3	3
2	6	0.11085	27.0636	0.0577357	0	9.0212	0	0.211	0	1
2	6	0.18305	16.389	0.0114723	27.3149	0	5.46299	0.14895	5	0
2	6	0.12805	31.2378	0.125342	31.2378	7.80945	0	0.2307	4	1
2	6	0.1063	28.222	0.0456256	9.40734	9.40734	9.40734	0.07355	1	1
2	6	0.1042	28.7908	0.0551823	38.3877	9.59693	28.7908	0.04355	4	1
2	6	0.1508	26.5252	0.117706	13.2626	0	6.6313	0.1328	2	0
2	6	0.174	22.9885	0.0752874	22.9885	17.2414	17.2414	0.01965	4	3
2	6	0.159	31.4465	0.133648	31.4465	6.28931	6.28931	0.03045	5	1
[truncated: 613 more rows]

## Sheet: Molino
Fish ID	Age (dpf)	Swim Duration (s)	Swim Frequency (Hz)	Swim Duty Cycle	Aff Spike Rate-pre	Aff Spike Rate-swim	Aff Spike Rate-post	Refractory Period (s)	Spike Number-pre	Spike Number-swim
8	6	0.0701	42.796	0.00713267	0	0	0	2.28615	0	0
8	6	0.1731	23.108	0.0878105	0	0	0	0.9233	0	0
8	6	0.37055	18.8908	0.0862232	0	5.39738	2.69869	0.0771	0	2
8	6	0.64855	15.419	0.0764783	1.5419	4.6257	7.70951	0.1246	1	3
8	6	0.5279	17.0487	0.0681	1.8943	0	3.7886	0.11785	1	0
8	6	0.29185	20.5585	0.142025	3.42642	6.85284	3.42642	0.09315	1	2
8	6	0.29225	13.6869	0.0598802	0	6.84346	3.42173	0.28365	0	2
8	6	0.114	26.3158	0.00482456	0	8.77193	0	0.20765	0	1
8	6	0.5766	13.8744	0.0700659	3.46861	1.7343	3.46861	0.1845	2	1
8	6	0.1215	24.6914	0.0477366	8.23045	8.23045	0	0.13285	1	1
8	6	0.18245	21.9238	0.0931762	5.48095	0	10.9619	0.02585	1	0
8	6	0.17305	17.336	0.0283155	0	11.5574	0	0.1814	0	2
8	6	0.1758	17.0648	0.0292947	5.68828	5.68828	0	0.24185	1	1
8	6	0.83965	16.6736	0.0794974	3.57292	4.76389	7.14583	0.1883	3	4
8	6	1.1558	15.5736	0.0981139	6.92161	2.5956	6.92161	0.0398	8	3
8	6	0.3754	18.6468	0.135056	2.66383	2.66383	2.66383	0.15315	1	1
8	6	0.26935	18.5632	0.0775942	7.42528	3.71264	3.71264	0.0641	2	1
8	6	0.1708	23.4192	0.0588407	0	5.8548	5.8548	0.0913	0	1
8	6	0.29585	23.6606	0.0885584	6.76018	10.1403	6.76018	0.03415	2	3
8	6	1.6395	16.4684	0.114974	7.3193	7.3193	4.87954	0.01455	12	12
8	6	0.21905	18.2607	0.0648254	9.13034	0	9.13034	0.0139	2	0
8	6	2.2165	13.986	0.0972705	5.8651	4.51162	6.76743	0.01605	13	10
8	6	0.31445	19.0809	0.081889	9.54047	6.36031	3.18016	0.06195	3	2
8	6	0.58815	15.3022	0.117147	3.40049	5.10074	10.2015	0.05035	2	3
8	6	0.115	26.087	0.0804348	0	8.69565	8.69565	0.05165	0	1
8	6	0.24815	20.1491	0.118678	8.05964	0	8.05964	0.0445	2	0
8	6	0.2496	20.0321	0.0594952	8.01282	8.01282	8.01282	0.15735	2	2
8	6	1.15195	12.1533	0.107774	7.81284	5.20856	6.94475	0.09635	9	6
8	6	0.23765	21.0393	0.0452346	12.6236	4.20787	4.20787	0.06365	3	1
8	6	0.3425	23.3577	0.0745985	0	8.75912	0	0.362	0	3
8	6	0.11595	25.8732	0.0849504	0	8.62441	0	0.12925	0	1
8	6	0.1724	23.2019	0.0867169	5.80046	11.6009	0	0.1967	1	2
8	6	0.18135	16.5426	0.0410808	5.5142	11.0284	0	0.28535	1	2
8	6	0.2535	19.7239	0.090927	3.94477	11.8343	7.88955	0.12925	1	3
8	6	0.3224	18.6104	0.142215	6.20347	3.10174	9.30521	0.0174	2	1
8	6	1.0861	15.6523	0.123009	4.60363	2.76218	7.3658	0.12865	5	3
8	6	0.11965	25.0731	0.083995	0	8.35771	8.35771	0.01515	0	1
8	6	0.22065	22.6603	0.0484931	4.53206	0	4.53206	0.05715	1	0
8	6	0.2396	20.8681	0.0926544	0	0	8.34725	0.11785	0	0
8	6	0.1816	22.0264	0.0528634	5.50661	5.50661	0	0.1836	1	1
8	6	0.24515	16.3165	0.0371201	4.07914	0	0	0.3483	1	0
8	6	0.2741	18.2415	0.11328	3.6483	7.29661	7.29661	0.057	1	2
8	6	1.45485	15.1218	0.139224	4.81149	5.49885	5.49885	0.2619	7	8
8	6	0.1762	22.7015	0.0783201	5.67537	5.67537	11.3507	0.0289	1	1
8	6	0.22135	18.0709	0.0646036	13.5532	4.51773	4.51773	0.1694	3	1
8	6	0.17735	16.9157	0.0363688	0	0	11.2771	0.049	0	0
8	6	0.29205	20.5444	0.084917	0	0	6.84814	0.183	0	0
8	6	0.29105	20.615	0.137777	3.43584	0	6.87167	0.0711	1	0
8	6	0.2972	20.1884	0.0497981	6.72948	10.0942	3.36474	0.2486	2	3
8	6	0.28735	20.8805	0.106838	3.48008	6.96015	6.96015	0.0707	1	2
8	6	0.29845	20.1039	0.085609	6.70129	10.0519	10.0519	0.1281	2	3
8	6	0.8878	14.6429	0.0902793	5.6319	3.37914	5.6319	0.1968	5	3
8	6	0.36255	19.3077	0.100952	5.51648	11.033	5.51648	0.1588	2	4
8	6	0.11465	26.1666	0.0828609	8.7222	0	8.7222	0.0755	1	0
8	6	0.1125	26.6667	0.0466667	8.88889	8.88889	8.88889	0.02395	1	1
8	6	0.33665	20.7931	0.137086	5.94089	2.97044	5.94089	0.03635	2	1
8	6	0.3628	19.2944	0.0864112	8.26902	8.26902	11.0254	0.02965	3	3
8	6	0.24295	20.5804	0.088084	8.23215	0	8.23215	0.01745	2	0
8	6	0.1668	23.9808	0.08753	5.9952	0	11.9904	0.0036	1	0
8	6	0.23535	21.245	0.0639473	12.747	4.24899	16.996	0.00695	3	1
8	6	0.3681	19.0166	0.091687	13.5833	2.71665	2.71665	0.12235	5	1
8	6	0.1782	22.4467	0.0572391	0	5.61167	5.61167	0.05365	0	1
8	6	0.2302	21.7202	0.0738488	8.6881	0	8.6881	0.0972	2	0
8	6	0.54115	12.9354	0.0635683	5.54375	5.54375	5.54375	0.1151	3	3
8	6	0.87915	13.6495	0.0886652	5.68731	6.82477	6.82477	0.11765	5	6
8	6	0.16965	23.578	0.0533451	5.89449	5.89449	5.89449	0.10145	1	1
8	6	0.2241	22.3115	0.105979	4.46229	4.46229	13.3869	0.03605	1	1
8	6	0.183	16.3934	0.0248634	0	10.929	5.46448	0.0037	0	2
8	6	0.28445	21.0933	0.077518	7.03111	3.51556	3.51556	0.15835	2	1
8	6	0.1184	25.3378	0.0498311	0	8.44595	16.8919	0.01215	0	1
8	6	0.2763	18.0963	0.0613464	7.23851	0	3.61925	0.23735	2	0
8	6	0.4692	14.919	0.12809	6.39386	4.26257	4.26257	0.15415	3	2
8	6	0.47255	16.9294	0.0943815	4.23236	8.46471	2.11618	0.21135	2	4
8	6	0.36895	13.552	0.099336	5.42079	5.42079	2.71039	0.03845	2	2
8	6	0.92455	17.3057	0.120816	6.48964	4.32643	6.48964	0.15495	6	4
8	6	0.51205	15.6235	0.0995996	7.81174	5.8588	11.7176	0.0001	4	3
8	6	0.2279	21.9394	0.121325	4.38789	4.38789	4.38789	0.11095	1	1
8	6	0.11485	26.121	0.0404876	0	0	0	0.1394	0	0
8	6	0.17875	22.3776	0.088951	5.59441	11.1888	0	0.24745	1	2
8	6	0.37145	21.5372	0.0690537	5.3843	0	10.7686	0.15675	2	0
8	6	0.21615	23.1321	0.0659264	4.62642	4.62642	4.62642	0.13155	1	1
8	6	0.1201	24.9792	0.0757702	0	0	8.32639	0.0426	0	0
8	6	0.1721	17.4317	0.0380593	5.81058	5.81058	0	0.29975	1	1
8	6	0.6526	15.3233	0.0936255	4.597	4.597	6.12933	0.15185	3	3
8	6	0.30715	19.5344	0.103858	9.76721	3.25574	6.51148	0.04885	3	1
8	6	0.22785	21.9443	0.0493746	0	8.7777	13.1666	0.05405	0	2
8	6	0.2571	23.3372	0.0964605	3.88954	3.88954	7.77907	0.069	1	1
8	6	0.12245	24.4998	0.0342997	0	16.3332	8.1666	0.0509	0	2
8	6	0.11125	26.9663	0.0413483	0	17.9775	8.98876	0.10405	0	2
8	6	0.2454	20.3749	0.124287	4.07498	0	8.14996	0.00765	1	0
8	6	0.27245	22.0224	0.145348	3.6704	7.3408	3.6704	0.0001	1	2
8	6	0.4661	19.3092	0.168848	4.29092	4.29092	4.29092	0.2983	2	2
8	6	0.1738	17.2612	0.0287687	5.75374	0	0	0.47075	1	0
8	6	0.177	22.5989	0.0774011	11.2994	5.64972	5.64972	0.05285	2	1
8	6	0.24385	20.5044	0.120566	8.20176	4.10088	12.3026	0.101	2	1
8	6	0.23095	21.6497	0.125568	4.32994	4.32994	4.32994	0.0499	1	1
8	6	0.3684	19.0011	0.108713	8.14332	5.42888	2.71444	0.2608	3	2
8	6	0.177	22.5989	0.114689	0	5.64972	11.2994	0.00865	0	1
8	6	0.17045	23.4673	0.104723	11.7336	5.86682	11.7336	0.07935	2	1
8	6	0.12625	23.7624	0.0360396	0	0	0	0.16495	0	0
8	6	0.22085	22.6398	0.131084	0	4.52796	9.05592	0.00825	0	1
8	6	0.11485	26.121	0.0391815	17.414	0	17.414	0.01075	2	0
8	6	0.2364	21.1506	0.0901015	8.46024	0	16.9205	0.0059	2	0
8	6	0.23205	21.5471	0.102564	8.61883	8.61883	0	0.4177	2	2
8	6	0.35505	19.7155	0.165188	5.63301	5.63301	5.63301	0.0325	2	2
8	6	0.3513	19.926	0.175064	0	5.69314	5.69314	0.21035	0	2
8	6	0.34645	25.9778	0.193246	5.77284	5.77284	11.5457	0.0592	2	2
8	6	0.3266	21.4329	0.141611	3.06185	3.06185	3.06185	0.0965	1	1
8	6	0.16415	24.368	0.088943	0	0	12.184	0.0315	0	0
8	6	0.1382	21.7077	0.0824891	7.23589	0	7.23589	0.0469	1	0
8	6	0.22215	22.5073	0.106685	4.50146	4.50146	0	0.4194	1	1
8	6	0.1788	22.3714	0.067953	11.1857	5.59284	5.59284	0.0759	2	1
8	6	0.1644	24.3309	0.0927616	6.08273	6.08273	0	0.1883	1	1
8	6	0.60525	16.5221	0.0997109	1.65221	1.65221	6.60884	0.04045	1	1
8	6	0.3704	16.1987	0.0580454	8.09935	2.69978	8.09935	0.0022	3	1
8	6	0.18095	22.1056	0.155292	5.52639	0	0	0.26595	1	0
8	6	0.1789	22.3589	0.122135	0	5.58971	11.1794	0.06835	0	1
8	6	0.36	19.4444	0.17	2.77778	5.55556	2.77778	0.27055	1	2
8	6	0.2262	22.1043	0.147436	4.42087	4.42087	4.42087	0.08985	1	1
8	6	0.6184	19.4049	0.179576	3.23415	1.61708	6.46831	0.26455	2	1
8	6	0.227	22.0264	0.142291	8.81057	0	8.81057	0.14535	2	0
8	6	0.1238	24.2326	0.0472536	8.07754	0	0	0.3496	1	0
8	6	0.23555	21.2269	0.11229	12.7361	8.49077	8.49077	0.08755	3	2
8	6	0.48405	12.3954	0.0708604	8.26361	4.1318	4.1318	0.0652	4	2
8	6	0.1187	25.2738	0.0480202	8.4246	8.4246	0	0.12175	1	1
8	6	0.8392	17.8742	0.109688	7.14967	5.95806	3.57483	0.4316	6	5
8	6	0.2189	22.8415	0.112152	4.5683	4.5683	9.13659	0.1329	1	1
8	6	0.23495	21.2811	0.117046	8.51245	4.25622	4.25622	0.1938	2	1
8	6	0.2442	20.475	0.0995086	8.19001	0	0	0.55905	2	0
8	6	0.29295	20.4813	0.0865335	0	3.41355	6.8271	0.1457	0	1
8	6	0.25165	19.8689	0.0466918	0	3.97377	11.9213	0.08275	0	1
8	6	1.1918	15.1032	0.118938	5.0344	6.71254	4.19533	0.0827	6	8
8	6	0.16465	18.2205	0.0258123	0	0	0	0.1718	0	0
8	6	0.1247	24.0577	0.0761828	0	0	8.01925	0.1079	0	0
8	6	0.16175	24.7295	0.0602782	0	0	0	0.5979	0	0
8	6	0.36095	13.8523	0.0953041	2.77047	0	2.77047	0.1169	1	0
8	6	0.4309	18.5658	0.0746113	2.32072	4.64145	6.96217	0.07375	1	2
8	6	0.2209	27.1616	0.0966501	4.52694	0	4.52694	0.05125	1	0
8	6	1.11165	16.1921	0.105024	1.79913	5.39738	4.49782	0.23675	2	6
8	6	0.1575	25.3968	0.0904762	6.34921	0	6.34921	0.0748	1	0
8	6	0.1668	17.9856	0.0821343	0	0	5.9952	0.0427	0	0
8	6	0.5896	18.6567	0.158412	1.69607	1.69607	6.78426	0.1314	1	1
8	6	0.81915	14.6493	0.0673259	3.66233	4.88311	7.32467	0.01425	3	4
8	6	0.30855	19.4458	0.0993356	9.7229	6.48193	3.24097	0.0475	3	2
8	6	0.2174	22.9991	0.191352	0	9.19963	4.59982	0.1945	0	2
8	6	0.10735	27.946	0.0442478	0	9.31532	0	0.2536	0	1
8	6	0.2333	21.4316	0.0726532	4.28633	0	4.28633	0.12995	1	0
8	6	1.42155	16.883	0.136963	3.51729	4.22074	4.9242	0.231	5	6
8	6	0.16675	17.991	0.0341829	5.997	0	0	0.46405	1	0
8	6	0.21805	22.9305	0.165788	0	0	0	0.7777	0	0
8	6	0.39615	15.1458	0.0569229	0	5.04859	2.5243	0.06345	0	2
8	6	0.21855	18.3024	0.174788	0	4.57561	9.15122	0.0164	0	1
8	6	0.23145	17.2824	0.0931087	4.32059	4.32059	0	0.32205	1	1
8	6	0.12145	24.7015	0.00411692	0	0	8.23384	0.0044	0	0
8	6	0.1686	17.7936	0.0554567	5.9312	5.9312	0	0.3581	1	1
8	6	0.24325	20.555	0.141624	0	0	4.111	0.10325	0	0
8	6	0.30905	19.4143	0.108558	0	0	3.23572	0.1831	0	0
8	6	1.20795	12.4177	0.0967755	2.48355	4.13924	3.3114	0.08765	3	5
8	6	0.28025	21.4095	0.080107	3.56824	0	3.56824	0.18315	1	0
8	6	0.3725	16.1074	0.103221	5.36913	0	5.36913	0.20535	2	0
8	6	0.39205	20.4056	0.0841729	5.10139	2.5507	2.5507	0.08945	2	1
8	6	0.75725	18.4879	0.178277	2.64114	2.64114	5.28227	0.02225	2	2
8	6	0.09415	31.864	0.070632	0	0	0	0.15695	0	0
8	6	0.21235	18.8368	0.0713445	4.70921	9.41841	9.41841	0.05375	1	2
8	6	0.1034	29.0135	0.0618956	9.67118	9.67118	0	1.07485	1	1
8	6	0.2766	14.4613	0.0432032	3.61533	3.61533	0	0.7883	1	1
8	6	0.30555	19.6367	0.135493	6.54557	0	0	0.72865	2	0
8	6	0.4356	13.7741	0.0433884	4.59137	2.29568	4.59137	0.0279	2	1
8	6	0.4968	14.0902	0.0877617	4.02576	6.03865	4.02576	0.1011	2	3
8	6	0.3628	16.538	0.0428611	5.51268	0	11.0254	0.07055	2	0
8	6	0.34755	20.141	0.0474752	2.87728	5.75457	0	0.7217	1	2
8	6	0.34825	20.1005	0.130653	2.8715	5.743	2.8715	0.24485	1	2
8	6	0.26055	19.1902	0.108616	0	3.83803	3.83803	0.07135	0	1
8	6	0.384	18.2292	0.144661	0	5.20833	10.4167	0.03745	0	2
8	6	1.2205	15.5674	0.0968046	4.91602	2.45801	4.91602	0.3066	6	3
8	6	0.12015	24.9688	0.116521	0	0	0	0.3638	0	0
8	6	0.169	23.6686	0.0816568	0	5.91716	0	0.49915	0	1
8	6	0.39835	15.0621	0.0710431	0	5.02071	5.02071	0.053	0	2
8	6	0.1052	28.5171	0.00427757	9.5057	0	0	1.1373	1	0
8	6	0.40095	14.9645	0.144781	2.49408	7.48223	7.48223	0.0267	1	3
8	6	0.30485	19.6818	0.0844678	9.84091	0	9.84091	0.00535	3	0
8	6	0.3984	17.5703	0.174322	7.53012	2.51004	2.51004	0.20295	3	1
8	6	0.23705	21.0926	0.0729804	0	0	0	0.32595	0	0
8	6	0.75395	15.9162	0.110485	5.30539	3.97904	3.97904	0.017	4	3
8	6	0.53615	14.9212	0.107712	1.86515	1.86515	3.7303	0.2201	1	1
8	6	0.2368	21.1149	0.104307	0	4.22297	8.44595	0.0411	0	1
8	6	0.1689	23.6827	0.0748964	0	0	0	0.25315	0	0
8	6	0.81135	16.0227	0.089727	3.69754	2.46503	1.23251	0.13855	3	2
8	6	0.2904	20.6612	0.1052	0	0	3.44353	0.24935	0	0
8	6	0.1847	21.6567	0.13373	0	0	10.8284	0.0138	0	0
8	6	0.23105	21.6403	0.10171	0	0	0	0.7632	0	0
8	6	0.13065	22.9621	0.0451588	0	0	0	0.50305	0	0
8	6	0.3004	19.9734	0.141478	3.32889	3.32889	3.32889	0.03615	1	1
8	6	0.53895	14.8437	0.0458299	5.56638	1.85546	1.85546	0.1435	3	1
8	6	0.1385	21.6606	0.0422383	0	0	0	0.45195	0	0
8	6	1.39315	15.0738	0.118293	2.15339	3.58899	3.58899	0.4492	3	5
8	6	0.4382	13.6924	0.0668644	2.28206	4.56413	2.28206	0.05175	1	2
8	6	0.26365	22.7574	0.161767	3.79291	3.79291	3.79291	0.22915	1	1
8	6	0.2459	20.3335	0.0583571	0	4.06669	12.2001	0.06545	0	1
8	6	0.2911	10.3057	0.0121951	3.43525	6.87049	3.43525	0.27075	1	2
8	6	0.1187	25.2738	0.0631845	8.4246	0	0	0.2277	1	0
8	6	0.29975	16.6806	0.0722269	6.67223	6.67223	0	0.37435	2	2
8	6	0.40125	14.9533	0.140935	7.47664	4.98442	4.98442	0.1137	3	2
8	6	0.3077	19.4995	0.0820604	9.74976	6.49984	3.24992	0.1581	3	2
8	6	1.32575	15.8401	0.111861	5.28003	2.26287	6.03432	0.2173	7	3
8	6	0.1605	18.6916	0.0753894	6.23053	6.23053	6.23053	0.0317	1	1
8	6	0.37105	18.8654	0.0828729	0	0	8.08516	0.05695	0	0
8	6	0.29895	20.0702	0.140826	0	0	10.0351	0.08285	0	0
8	6	0.4359	20.6469	0.122849	11.4705	6.88231	2.2941	0.39675	5	3
8	6	0.62375	22.4449	0.207455	1.60321	3.20641	4.80962	0.153	1	2
8	6	0.2939	10.2076	0.00680504	6.80504	6.80504	10.2076	0.1107	2	2
8	6	0.2349	25.5428	0.102597	4.25713	0	8.51426	0.01035	1	0
8	6	0.1692	23.6407	0.11909	0	0	5.91017	0.1414	0	0
7	6	0.2946	20.3666	0.0960625	50.9165	33.9443	0	0.00245	15	10
7	6	0.1859	21.5169	0.0957504	32.2754	53.7924	37.6547	0.0131	6	10
7	6	0.34835	20.0947	0.171092	51.6722	45.9308	45.9308	0.0007	18	16
7	6	0.2525	19.802	0.127723	43.5644	23.7624	55.4455	0.0037	11	6
7	6	0.2478	20.1776	0.118442	40.3551	36.3196	36.3196	0.0168	10	9
7	6	0.44885	15.5954	0.0935725	40.1025	49.0141	35.6467	0.03455	18	22
7	6	0.30075	19.9501	0.12286	49.8753	56.5254	23.2751	0.0097	15	17
7	6	0.3821	18.3198	0.152447	41.8739	47.1081	52.3423	0.0166	16	18
7	6	0.3595	19.4715	0.119054	36.1613	47.2879	41.7246	0.03355	13	17
7	6	0.3281	18.2871	0.0976836	45.7178	36.5742	48.7656	0.0041	15	12
7	6	0.29515	20.3286	0.0921565	60.9859	44.0454	54.2097	0.0113	18	13
7	6	0.3725	13.4228	0.0849664	53.6913	51.0067	45.6376	0.0031	20	19
7	6	0.19225	20.8062	0.113394	41.6125	52.0156	46.814	0.02155	8	10
7	6	0.35675	16.8185	0.132866	44.8493	53.2586	50.4555	0.0118	16	19
7	6	0.77065	18.1665	0.158113	48.0114	41.5234	38.9282	0.034	37	32
7	6	0.3584	19.5312	0.113421	39.0625	47.433	44.6429	0.00535	14	17
7	6	0.3047	19.6915	0.123564	52.5107	36.1011	32.8192	0.01205	16	11
7	6	0.2536	23.6593	0.133281	59.1483	31.5457	47.3186	0.0062	15	8
7	6	0.3624	19.3157	0.142246	38.6313	24.8344	35.872	0.00195	14	9
7	6	0.306	19.6078	0.136765	52.2876	52.2876	39.2157	0.0031	16	16
7	6	0.5608	17.8317	0.108862	44.5792	46.3623	49.9287	0.01195	25	26
7	6	0.78295	17.8811	0.117313	47.2572	43.4255	49.8116	0	37	34
7	6	0.19435	20.5814	0.113712	46.3082	51.4536	51.4536	0.02125	9	10
7	6	0.20145	19.856	0.0734674	64.5321	64.5321	39.7121	0.07195	13	13
7	6	0.2224	22.482	0.0953237	49.4604	49.4604	49.4604	0.0081	11	11
7	6	0.3556	22.4972	0.127531	33.7458	33.7458	39.3701	0.0246	12	12
7	6	0.28525	21.0342	0.0673094	42.0684	38.5627	42.0684	0.0018	12	11
7	6	0.73405	16.3477	0.108508	40.8692	46.3184	36.7822	0.0214	30	34
7	6	0.3817	18.339	0.0974587	49.7773	55.017	47.1575	0.0074	19	21
7	6	0.31635	18.9663	0.130552	47.4158	50.5769	50.5769	0.0034	15	16
7	6	0.6756	16.2818	0.089254	45.8851	39.9645	48.8455	0.01455	31	27
7	6	0.3685	18.9959	0.133243	43.4193	46.133	43.4193	0.0037	16	17
7	6	0.144	20.8333	0.00694444	62.5	48.6111	48.6111	0.0498	9	7
7	6	0.3085	19.4489	0.106645	48.6224	45.3809	48.6224	0.0241	15	14
7	6	0.36555	19.1492	0.145397	43.7697	43.7697	51.9765	0.01175	16	16
7	6	0.8764	17.1155	0.131789	54.7695	45.6413	51.3464	0.00475	48	40
7	6	0.181	22.0994	0.0364641	38.674	38.674	66.2983	0.0021	7	7
7	6	0.24695	20.247	0.108322	44.5434	36.4446	32.3952	0.04015	11	9
7	6	0.18685	21.4075	0.101151	48.167	42.8151	53.5189	0.04015	9	8
7	6	0.18505	21.6158	0.102405	54.0394	54.0394	43.2316	0.01575	10	10
7	6	0.366	19.1257	0.123497	49.1803	38.2514	46.4481	0.00225	18	14
7	6	0.24375	24.6154	0.0276923	49.2308	36.9231	41.0256	0.01835	12	9
7	6	0.18255	21.9118	0.0991509	60.2575	49.3016	54.7795	0.01185	11	9
7	6	0.31295	19.1724	0.0929861	44.7356	54.3218	38.3448	0.0825	14	17
7	6	0.42035	19.0318	0.126561	47.5794	40.4425	38.0635	0.00355	20	17
7	6	0.73535	14.9589	0.103216	39.437	44.8766	48.9563	0.03145	29	33
7	6	0.30335	19.7791	0.0441734	46.1513	42.8548	49.4478	0.00855	14	13
7	6	0.42505	18.8213	0.137631	47.0533	49.406	47.0533	0.08965	20	21
7	6	0.29965	20.0234	0.103621	46.7212	46.7212	36.7095	0.0348	14	14
7	6	0.54385	18.3874	0.157304	40.4523	45.9686	49.646	0.00745	22	25
7	6	1.16675	17.9987	0.116906	47.1395	44.5682	41.1399	0.031	55	52
7	6	0.2934	20.4499	0.088105	51.1247	47.7164	47.7164	0.00065	15	14
7	6	0.24355	20.5297	0.119277	57.4831	57.4831	49.2712	0.00595	14	14
7	6	0.31195	19.2339	0.0865523	32.0564	48.0846	35.2621	0.0901	10	15
7	6	1.0215	18.6001	0.144542	37.2002	46.0108	35.2423	0.0009	38	47
7	6	0.25055	19.9561	0.138296	63.8595	31.9298	47.8946	0.03705	16	8
7	6	0.36625	19.1126	0.112765	46.4164	46.4164	51.8771	0.02975	17	17
7	6	0.40215	19.8931	0.106304	44.7594	47.2461	34.8129	0.008	18	19
7	6	0.2437	20.517	0.0874025	32.8272	53.3443	41.0341	0.00825	8	13
7	6	0.99625	17.064	0.128381	42.1581	40.1506	46.1731	0.03365	42	40
7	6	0.37995	18.4235	0.108699	47.3747	47.3747	52.6385	0.0338	18	18
7	6	0.2938	20.4221	0.100238	37.4404	30.6331	40.8441	0.00355	11	9
7	6	0.5518	19.9348	0.129485	50.743	39.8695	45.3063	0.0118	28	22
7	6	0.2636	18.9681	0.0868741	41.7299	53.1108	26.5554	0.00385	11	14
7	6	0.3232	18.5644	0.0792079	43.3168	49.505	34.0347	0.0273	14	16
7	6	0.3201	18.7441	0.119338	43.7363	37.4883	43.7363	0.0093	14	12
7	6	0.34895	20.0602	0.149448	37.2546	37.2546	28.6574	0.0016	13	13
7	6	0.6565	19.802	0.120335	35.0343	44.1736	39.604	0.0156	23	29
7	6	0.1371	21.8818	0.0594457	43.7637	36.4697	21.8818	0.00555	6	5
7	6	0.3606	19.4121	0.111204	27.7316	44.3705	36.051	0.02595	10	16
7	6	0.25295	19.7668	0.166831	35.5802	59.3003	51.3936	0.0061	9	15
7	6	1.0793	16.6775	0.122857	45.3998	43.5467	42.6202	0.00165	49	47
7	6	0.2507	19.9442	0.0931392	51.8548	43.8771	35.8995	0.09485	13	11
7	6	0.3644	19.2097	0.155873	35.6751	49.3963	21.9539	0.01855	13	18
7	6	0.3747	16.0128	0.134908	29.3568	42.7008	56.0448	0.04545	11	16
7	6	0.2966	20.2293	0.108395	26.9724	40.4585	53.9447	0.0203	8	12
7	6	0.3329	21.0273	0.126765	39.0508	45.0586	18.0234	0.0602	13	15
7	6	0.7337	17.7184	0.148221	31.348	42.2516	38.1627	0.00515	23	31
7	6	0.5223	19.1461	0.119663	30.6337	45.9506	38.2922	0.01505	16	24
7	6	0.8212	18.266	0.11471	40.1851	36.5319	43.8383	0.01685	33	30
7	6	0.186	21.5054	0.125269	37.6344	26.8817	32.2581	0.0025	7	5
7	6	0.1866	21.4362	0.0969989	37.5134	58.9496	42.8725	0.03165	7	11
7	6	0.3549	19.7239	0.112849	39.4477	61.9893	42.2654	0.05205	14	22
7	6	0.3655	19.1518	0.118741	35.5677	49.2476	43.7756	0.04755	13	18
7	6	0.1225	24.4898	0.0077551	48.9796	48.9796	32.6531	0.00445	6	6
7	6	0.18445	16.2646	0.0474383	59.6368	43.3722	16.2646	0.07665	11	8
7	6	0.36375	19.244	0.0867354	38.488	30.2405	43.9863	0.00245	14	11
7	6	0.1371	21.8818	0.0685631	43.7637	21.8818	43.7637	0.0032	6	3
7	6	0.5811	17.2087	0.11418	32.6966	32.6966	37.8592	0.00425	19	19
7	6	0.2655	18.8324	0.0845574	52.7307	33.8983	37.6648	0.0084	14	9
7	6	0.18295	21.8639	0.0696912	38.2618	38.2618	21.8639	0.09935	7	7
7	6	0.30525	16.38	0.0768223	29.484	32.76	45.864	0.0307	9	10
7	6	0.1426	21.0379	0.0147265	56.101	42.0757	21.0379	0.05605	8	6
7	6	0.4062	19.6947	0.123092	29.5421	27.0803	27.0803	0.02695	12	11
7	6	0.4421	15.8335	0.13515	27.1432	27.1432	36.1909	0.0043	12	12
7	6	0.24625	20.3046	0.115127	24.3655	32.4873	20.3046	0.0859	6	8
7	6	0.721	18.0305	0.136755	45.7698	37.448	42.9958	0.0123	33	27
7	6	0.24535	20.3791	0.15753	36.6823	28.5307	44.8339	0.0379	9	7
7	6	0.54405	18.3807	0.147321	33.0852	23.8949	33.0852	0.0233	18	13
7	6	0.33995	20.5913	0.145168	41.1825	41.1825	26.4745	0.0994	14	14
7	6	0.2432	20.5592	0.11616	32.8947	32.8947	32.8947	0.1072	8	8
7	6	0.3304	12.1065	0.0503935	33.293	30.2663	24.2131	0.0189	11	10
7	6	0.54045	16.6528	0.118235	33.3056	35.1559	33.3056	0.01115	18	19
7	6	0.2533	19.7394	0.109554	39.4789	35.531	35.531	0.00155	10	9
7	6	0.22695	22.0313	0.148931	52.8751	39.6563	26.4375	0.09235	12	9
7	6	0.30555	19.6367	0.0993291	39.2734	29.4551	32.7279	0.02025	12	9
7	6	0.198	20.202	0.0959596	30.303	25.2525	40.404	0.0539	6	5
7	6	0.1942	20.5973	0.11174	20.5973	51.4933	20.5973	0.103	4	10
7	6	0.24935	20.0521	0.0767997	32.0834	32.0834	40.1043	0.00015	8	8
7	6	0.30865	19.4395	0.113883	35.6391	25.9193	32.3992	0.06355	11	8
7	6	0.31145	19.2647	0.122331	38.5295	25.6863	25.6863	0.04805	12	8
7	6	0.1798	22.2469	0.0428254	55.6174	38.9321	50.0556	0.00415	10	7
7	6	0.32	21.875	0.128594	28.125	34.375	34.375	0.03765	9	11
7	6	0.22595	22.1288	0.11684	35.4061	48.6833	26.5545	0.0024	8	11
7	6	0.24165	24.8293	0.13801	28.9675	37.2439	8.27643	0.0348	7	9
7	6	0.11785	25.4561	0.0971574	33.9415	33.9415	76.3683	0.0035	4	4
7	6	0.2379	21.0172	0.116646	37.831	42.0345	37.831	0.01945	9	10
7	6	0.2467	20.2675	0.118565	40.5351	32.4281	32.4281	0.0015	10	8
7	6	0.31575	19.0024	0.152811	34.8377	28.5036	28.5036	0.0239	11	9
7	6	0.4787	18.8009	0.175162	31.3349	33.4239	25.0679	0.01135	15	16
7	6	0.8036	16.1772	0.122325	31.11	31.11	34.8432	0.04725	25	25
7	6	0.25335	19.7355	0.127689	43.4182	27.6298	35.524	0.009	11	7
7	6	0.2426	20.6101	0.145919	41.2201	32.9761	32.9761	0.0079	10	8
7	6	0.24115	20.734	0.141613	37.3212	24.8808	41.468	0.0056	9	6
7	6	0.4041	19.7971	0.12831	32.1703	27.221	32.1703	0.0137	13	11
7	6	0.2954	20.3114	0.114929	30.4672	33.8524	27.0819	0.0134	9	10
7	6	0.6058	18.1578	0.125289	24.7606	34.6649	37.9663	0.0278	15	21
7	6	0.1912	20.9205	0.0800209	26.1506	31.3808	31.3808	0.03085	5	6
7	6	0.3029	19.8085	0.0921096	29.7128	29.7128	33.0142	0.061	9	9
7	6	0.498	16.0643	0.113153	30.1205	28.1124	34.1365	0.06275	15	14
7	6	0.24465	20.4374	0.0586552	28.6123	36.7872	36.7872	0.0778	7	9
7	6	0.1849	21.6333	0.0803137	43.2666	37.8583	21.6333	0.0013	8	7
7	6	0.24485	20.4207	0.0969982	32.6731	40.8413	36.7572	0.0245	8	10
7	6	0.506	17.7866	0.121146	39.5257	25.6917	27.668	0.00295	20	13
7	6	0.33835	14.7776	0.0718191	44.3328	32.5107	23.6442	0.06635	15	11
7	6	0.30115	19.9236	0.121368	29.8854	29.8854	29.8854	0.0503	9	9
7	6	0.17925	22.3152	0.0945607	33.4728	27.894	55.788	0.01435	6	5
7	6	0.47145	19.09	0.1436	36.059	42.4223	29.6956	0.01365	17	20
7	6	0.4599	19.5695	0.143401	36.9646	43.4877	34.7902	0.01385	17	20
7	6	0.68425	16.076	0.118159	37.9978	20.4604	29.2291	0.01295	26	14
7	6	0.3673	19.058	0.166213	21.7806	35.3934	24.5031	0.0411	8	13
7	6	0.6435	18.648	0.13512	38.85	27.972	35.742	0.0282	25	18
7	6	0.24385	20.5044	0.11626	36.9079	45.1097	32.8071	0.0363	9	11
7	6	0.69915	18.594	0.138311	41.4789	35.7577	34.3274	0.0002	29	25
7	6	0.37915	18.4623	0.140446	31.6497	29.0123	31.6497	0.01685	12	11
7	6	1.0832	17.5406	0.125785	34.1581	34.1581	31.3885	0.02615	37	37
7	6	0.12205	24.5801	0.0848013	32.7735	32.7735	8.19336	0.06335	4	4
7	6	0.244	20.4918	0.119467	28.6885	20.4918	20.4918	0.0436	7	5
7	6	0.30565	19.6303	0.0691968	45.804	39.2606	42.5323	0.00065	14	12
7	6	0.34615	20.2224	0.167991	26.0003	31.7781	31.7781	0.0172	9	11
7	6	0.2927	20.4988	0.146908	37.5811	30.7482	37.5811	0.01805	11	9
7	6	0.2598	26.9438	0.0856428	30.7929	30.7929	30.7929	0.03225	8	8
7	6	0.24995	20.004	0.14963	40.008	32.0064	32.0064	5e-05	10	8
7	6	0.245	20.4082	0.0783673	28.5714	44.898	24.4898	0.0036	7	11
7	6	0.34785	14.374	0.0866753	40.2472	28.748	37.3724	0.0168	14	10
7	6	0.89805	21.157	0.19598	33.4057	40.0869	33.4057	0.0094	30	36
7	6	0.1107	27.1003	0.0397471	54.2005	45.1671	27.1003	0.00825	6	5
7	6	0.31015	19.3455	0.116395	29.0182	32.2425	41.9152	0.01605	9	10
7	6	0.644	18.6335	0.136102	40.3727	41.9255	35.7143	0.0173	26	27
7	6	0.30895	19.4206	0.0767114	48.5515	38.8412	48.5515	0.05285	15	12
7	6	0.3918	20.4186	0.166411	38.2848	30.6279	43.3895	0.00535	15	12
7	6	0.24515	20.3957	0.0501734	36.7122	32.6331	36.7122	0	9	8
7	6	0.49615	20.1552	0.11045	40.3104	32.2483	46.3569	0.01565	20	16
7	6	0.49925	22.033	0.117376	46.0691	34.0511	40.0601	0.0015	23	17
7	6	0.17845	22.4152	0.119641	16.8114	44.8305	16.8114	0.0104	3	8
7	6	0.23735	21.0659	0.143459	42.1319	37.9187	33.7055	0.01525	10	9
7	6	0.18385	21.7569	0.0726135	43.5137	43.5137	27.1961	0.02715	8	8
7	6	0.2504	19.9681	0.0834665	19.9681	31.9489	35.9425	0.00115	5	8
7	6	0.28335	21.1752	0.16799	35.292	17.646	35.292	0.00375	10	5
7	6	0.4124	19.3986	0.157008	21.8235	26.6731	21.8235	0.03845	9	11
7	6	0.3173	18.9095	0.101639	40.9707	34.6675	28.3643	0.057	13	11
7	6	0.1837	21.7746	0.128198	16.331	43.5493	43.5493	0.0195	3	8
7	6	0.37535	15.9851	0.102971	34.6343	37.2985	31.9702	0.0095	13	14
7	6	0.29525	20.3218	0.123793	30.4826	33.8696	33.8696	0.01295	9	10
7	6	0.89705	16.7215	0.105568	35.6725	33.443	36.7872	0.01045	32	30
7	6	0.13065	22.9621	0.0547264	22.9621	22.9621	30.6162	0.00765	3	3
7	6	0.2475	20.202	0.131717	40.404	32.3232	20.202	0.04765	10	8
7	6	0.31545	19.0204	0.12601	31.7007	31.7007	31.7007	0.0146	10	10
7	6	0.31005	22.577	0.1174	29.0276	29.0276	32.2529	0.009	9	9
7	6	0.35115	19.9345	0.107219	28.4779	34.1734	19.9345	0.0318	10	12
7	6	0.2871	20.8986	0.129223	31.348	34.8311	31.348	0.0151	9	10
7	6	0.76605	18.2756	0.13896	26.108	28.7188	30.0241	0.0042	20	22
7	6	0.48615	18.5128	0.109945	28.7977	39.0826	26.7407	0.0081	14	19
7	6	0.12775	23.4834	0.0641879	39.1389	23.4834	54.7945	0.00305	5	3
7	6	0.2549	19.6155	0.140055	47.0773	35.308	35.308	0.01165	12	9
7	6	0.3497	20.0172	0.134687	34.3151	34.3151	34.3151	0.0041	12	12
7	6	0.78005	17.9476	0.125248	30.7673	37.1771	34.6132	0.05205	24	29
7	6	0.24225	20.6398	0.0827657	37.1517	53.6636	33.0237	0.02345	9	13
7	6	0.3727	16.0987	0.0757982	34.8806	34.8806	34.8806	0.0362	13	13
7	6	0.27375	21.9178	0.12621	25.5708	40.1826	29.2237	0.00545	7	11
7	6	0.71845	15.3107	0.115944	33.4052	34.7971	40.3647	0.04075	24	25
7	6	0.1857	21.5401	0.0616586	26.9251	43.0802	32.3102	0.03385	5	8
7	6	0.1793	27.8862	0.0412716	27.8862	33.4635	39.0407	0.0118	5	6
7	6	0.30385	23.0377	0.128024	29.6199	42.7843	36.2021	0.0601	9	13
7	6	0.3021	23.1711	0.0645482	36.4118	36.4118	29.7915	0.0151	11	11
7	6	0.48675	18.49	0.165999	36.98	45.1977	41.0889	0.0897	18	22
7	6	0.31335	19.1479	0.118558	51.0611	35.1045	35.1045	0.03935	16	11
7	6	0.839	19.0703	0.158284	38.1406	38.1406	33.3731	0.0336	32	32
7	6	0.2452	24.4698	0.140294	20.3915	24.4698	32.6264	0.0161	5	6
7	6	0.35815	19.5449	0.15259	33.5055	36.2976	30.7134	0.0627	12	13
7	6	0.46575	19.3237	0.121095	34.3532	27.912	25.7649	0.03395	16	13
7	6	0.2628	22.8311	0.137557	38.0518	41.8569	38.0518	0.00265	10	11
7	6	0.3089	19.4238	0.0772095	29.1356	35.6102	38.8475	0.0415	9	11
7	6	0.1306	22.9709	0.06049	53.5988	7.65697	53.5988	0.02745	7	1
7	6	0.13395	22.3964	0.0227697	22.3964	22.3964	44.7928	0.01635	3	3
7	6	0.2891	20.7541	0.137669	20.7541	24.2131	31.1311	0.00835	6	7
7	6	0.23055	13.0124	0.0399046	34.6996	30.3622	30.3622	0.10025	8	7
7	6	0.3403	20.5701	0.215692	23.5087	20.5701	32.3244	0.0154	8	7
7	6	0.7468	18.7467	0.148433	29.459	22.7638	22.7638	0.0046	22	17
7	6	0.28755	20.8659	0.132846	27.8212	24.3436	17.3883	0.0204	8	7
7	6	0.1148	26.1324	0.0222125	34.8432	43.554	34.8432	0.0422	4	5
7	6	0.193	20.7254	0.105181	31.0881	10.3627	25.9067	0.0295	6	2
7	6	0.48415	14.4583	0.132294	20.6548	30.9821	33.0476	0.0215	10	15
7	6	0.64695	18.5486	0.152485	35.5514	29.3686	27.8229	0.0426	23	19
7	6	0.33975	23.5467	0.102134	23.5467	23.5467	26.4901	0.00815	8	8
7	6	0.1291	23.2378	0.00503486	23.2378	38.7297	30.9837	0.05485	3	5
7	6	0.2577	19.4024	0.104967	27.1634	27.1634	23.2829	0.0134	7	7
7	6	0.1892	21.1416	0.120243	36.9979	21.1416	42.2833	0.0106	7	4
7	6	0.3696	18.9394	0.106466	18.9394	27.0563	37.8788	0.00205	7	10
7	6	0.19195	20.8388	0.117999	31.2581	36.4678	31.2581	0.0146	6	7
7	6	0.29605	20.2668	0.0915386	30.4003	37.1559	33.7781	0.07105	9	11
7	6	0.9885	19.221	0.151998	29.3374	26.3025	31.3606	0.0029	29	26
7	6	0.234	21.3675	0.102564	21.3675	29.9145	42.735	0.0152	5	7
7	6	0.29265	20.5023	0.103024	34.1705	23.9194	30.7535	0.05625	10	7
7	6	0.35125	19.9288	0.0855516	31.3167	22.7758	31.3167	0.02565	11	8
7	6	0.47825	18.8186	0.104339	31.3643	31.3643	25.0915	0.0884	15	15
7	6	0.42675	18.7463	0.0762742	23.4329	25.7762	30.4628	0.0051	10	11
7	6	0.2204	22.686	0.130898	22.686	31.7604	27.2232	0.0039	5	7
7	6	0.6681	19.4582	0.122961	29.9356	28.4389	31.4324	0.0297	20	19
7	6	0.3053	19.6528	0.121684	32.7547	22.9283	36.0301	0.0359	10	7
7	6	0.30045	19.97	0.120486	16.6417	23.2984	36.6117	0.00175	5	7
7	6	0.34215	20.4589	0.185299	26.3043	23.3816	35.0723	0.0833	9	8
7	6	1.1335	14.9978	0.128805	27.3489	24.7022	27.3489	0.03795	31	28
7	6	0.46805	19.2287	0.150091	32.0479	29.9113	38.4574	0.0124	15	14
7	6	0.5747	17.4004	0.0824778	29.5807	29.5807	36.5408	0.0017	17	17
7	6	0.3493	20.0401	0.139708	14.3143	25.7658	28.6287	0.01205	5	9
7	6	0.68365	19.0156	0.133987	29.2547	26.3293	30.7175	0.02545	20	18
7	6	0.41275	21.805	0.116535	24.2277	19.3822	21.805	0.0407	10	8
7	6	0.2949	20.3459	0.144456	23.7369	20.3459	30.5188	0.03485	7	6
7	6	0.30115	19.9236	0.147435	19.9236	23.2442	23.2442	0.048	6	7
7	6	0.48205	18.6703	0.136397	29.0426	26.9682	20.7447	0.08325	14	13
7	6	0.35785	13.9723	0.116529	27.9447	33.5336	30.7391	0.02635	10	12
7	6	0.29265	20.5023	0.147104	30.7535	27.3364	20.5023	0.01225	9	8
7	6	0.29355	23.846	0.130301	34.0657	17.0329	20.4394	0.0123	10	5
7	6	0.2344	21.3311	0.139078	34.1297	17.0648	25.5973	0.008	8	4
7	6	0.2909	20.6256	0.129598	30.9385	27.5009	30.9385	0.01365	9	8
7	6	0.2462	20.3087	0.125508	32.4939	32.4939	32.4939	0.0316	8	8
7	6	0.63225	17.3982	0.138474	30.0514	26.8881	26.8881	0.00135	19	17
7	6	0.2357	21.2134	0.126644	25.4561	25.4561	16.9707	0.0424	6	6
7	6	0.35575	19.6767	0.123823	25.2987	30.9206	22.4877	0.06085	9	11
7	6	0.3062	19.595	0.090627	16.3292	26.1267	39.1901	0.03675	5	8
7	6	0.46135	15.1729	0.108378	34.6808	32.5133	32.5133	0.02045	16	15
7	6	0.16985	23.5502	0.0836032	23.5502	29.4377	35.3253	0.0073	4	5
7	6	0.4033	19.8364	0.130424	29.7545	22.3159	24.7954	0.01695	12	9
7	6	0.41615	19.2238	0.104169	36.0447	36.0447	26.4328	0.0345	15	15
7	6	0.28075	21.3713	0.0539626	24.9332	28.4951	42.7427	0.00995	7	8
7	6	1.14295	17.4986	0.13522	33.2473	25.3729	24.498	0.01835	38	29
7	6	0.4195	16.6865	0.0891538	28.6055	28.6055	28.6055	0.04125	12	12
7	6	0.17565	22.7726	0.159693	28.4657	17.0794	39.852	0.01235	5	3
7	6	0.5064	17.7725	0.142279	25.6714	25.6714	23.6967	0.0638	13	13
7	6	0.23685	21.1104	0.123285	16.8883	25.3325	46.4429	0.00445	4	6
7	6	0.3514	19.9203	0.104582	28.4576	39.8406	25.6118	0.00825	10	14
7	6	0.6211	20.9306	0.176461	27.3708	28.9808	22.5407	0.0643	17	18
7	6	0.11115	26.9906	0.0719748	35.9874	17.9937	17.9937	0.0197	4	2
7	6	0.17395	22.9951	0.202644	40.2414	28.7439	28.7439	0.05505	7	5
7	6	0.4146	19.2957	0.148939	28.9436	26.5316	24.1196	0.07975	12	11
7	6	0.37395	16.0449	0.0691269	26.7415	32.0899	29.4157	0.09555	10	12
7	6	0.1796	22.2717	0.079343	22.2717	5.56793	27.8396	0.01015	4	1
7	6	0.33765	20.7315	0.142307	26.6548	14.8082	29.6165	0.0071	9	5
7	6	0.2791	21.4977	0.150484	25.0806	28.6636	39.4124	0.00585	7	8
7	6	0.2427	20.6016	0.0968274	24.7219	41.2031	24.7219	0.04305	6	10
7	6	0.23965	20.8638	0.138535	25.0365	20.8638	33.382	0.01345	6	5
7	6	0.1235	24.2915	0.0870445	16.1943	0	24.2915	0.0151	2	0
7	6	0.4305	13.9373	0.0713124	27.8746	23.2288	30.1974	0.0098	12	10
7	6	0.23055	26.0247	0.110171	17.3498	26.0247	17.3498	0.01785	4	6
7	6	0.16795	23.8166	0.0913962	35.7249	23.8166	11.9083	0.06405	6	4
7	6	0.2643	18.9179	0.107643	30.2686	30.2686	15.1343	0.02705	8	8
7	6	0.18395	21.745	0.107366	38.0538	10.8725	21.745	0.0035	7	2
7	6	0.55015	18.1769	0.139871	25.4476	23.6299	25.4476	0.00425	14	13
7	6	0.1834	21.8103	0.113686	32.7154	21.8103	38.1679	0.00385	6	4
7	6	0.11925	25.1572	0.0763103	25.1572	8.38574	33.543	0.01275	3	1
7	6	0.3079	19.4868	0.123254	29.2303	19.4868	29.2303	0.027	9	6
7	6	0.2899	20.6968	0.135736	17.2473	24.1463	17.2473	0.01055	5	7
7	6	0.4345	20.7135	0.119793	27.618	18.412	25.3165	0.01625	12	8
7	6	0.317	22.082	0.106625	28.3912	28.3912	28.3912	0.0443	9	9
7	6	0.1115	26.9058	0.117489	62.7803	0	62.7803	0.01255	7	0
7	6	0.49075	18.3393	0.122466	36.6786	26.4901	34.6409	0.04695	18	13
7	6	0.2289	21.8436	0.151813	21.8436	30.581	26.2123	0.0307	5	7
7	6	0.23545	21.2359	0.0673179	33.9775	33.9775	33.9775	0.05445	8	8
7	6	0.2793	21.4823	0.12048	42.9646	25.0627	28.643	0.0595	12	7
7	6	0.4637	21.5657	0.134785	38.8182	23.7222	23.7222	0.06445	18	11
7	6	0.11715	25.6082	0.0887751	34.1443	17.0721	42.6803	0.00635	4	2
7	6	0.2446	20.4415	0.0934178	20.4415	32.7065	16.3532	0.1166	5	8
7	6	0.2956	23.6806	0.107747	13.5318	23.6806	30.4465	0.0109	4	7
7	6	0.30455	19.7012	0.124118	36.1189	22.9847	32.8353	0.0068	11	7
7	6	0.29325	20.4604	0.0970162	23.8704	40.9207	20.4604	0.0564	7	12
7	6	0.29335	20.4534	0.127493	34.089	27.2712	23.8623	0.04605	10	8
7	6	0.53295	18.7635	0.121963	30.0216	26.2689	31.8979	0.02165	16	14
7	6	0.2382	20.9908	0.106633	37.7834	29.3871	33.5852	0.05035	9	7
7	6	0.22905	21.8293	0.0857891	13.0976	17.4634	26.1952	0.0107	3	4
7	6	0.3426	20.432	0.173526	20.432	26.2697	32.1074	0.01465	7	9
7	6	0.3769	21.2258	0.165826	29.1855	34.4919	29.1855	0.0306	11	13
7	6	0.29015	20.679	0.126486	27.5719	34.4649	41.3579	0.0039	8	10
7	6	0.92275	17.3395	0.133839	21.6743	26.0092	26.0092	0.0621	20	24
7	6	0.2386	20.9556	0.154443	20.9556	16.7645	33.5289	0.0033	5	4
7	6	0.4009	19.9551	0.140309	29.9327	27.4383	27.4383	0.02045	12	11
7	6	0.2556	23.4742	0.220657	27.3865	43.036	19.5618	0.0522	7	11
7	6	0.3798	23.6967	0.156661	26.3296	31.5956	23.6967	0.0321	10	12
7	6	0.3793	21.0915	0.145004	23.7279	23.7279	23.7279	0.02085	9	9
7	6	0.799	18.7735	0.133229	26.2829	26.2829	27.5344	0.00045	21	21
7	6	0.23035	26.0473	0.0968092	26.0473	26.0473	39.071	0.0257	6	6
7	6	0.34095	20.5309	0.112187	26.3968	29.3298	29.3298	0.0215	9	10
7	6	0.6023	18.2633	0.135564	31.5457	21.5839	18.2633	0.0497	19	13
7	6	0.158	25.3165	0.0537975	18.9873	31.6456	31.6456	0.0364	3	5
7	6	0.1163	34.3938	0.00902837	17.1969	25.7954	42.9923	0.01405	2	3
7	6	0.21765	22.9727	0.076499	18.3781	22.9727	27.5672	0.01725	4	5
7	6	0.5362	20.5147	0.160108	29.8396	26.1097	27.9746	0.0142	16	14
7	6	0.17905	22.3401	0.106116	22.3401	27.9252	27.9252	0.0279	4	5
7	6	0.5526	19.9059	0.136355	34.3829	34.3829	28.954	0.04605	19	19
7	6	0.2152	23.2342	0.100372	23.2342	32.5279	27.881	0.0191	5	7
7	6	0.25125	23.8806	0.174129	23.8806	23.8806	31.8408	0.00635	6	6
7	6	0.27265	22.0062	0.172382	25.6739	36.6771	29.3416	0.02785	7	10
7	6	0.17105	23.385	0.140602	29.2312	11.6925	23.385	0.00735	5	2
7	6	0.39925	20.0376	0.150657	25.047	35.0657	30.0564	0.08125	10	14
7	6	0.3164	22.1239	0.135114	15.8028	47.4083	28.445	0.06805	5	15
7	6	0.7676	19.5414	0.186295	32.569	22.147	24.7525	0.0259	25	17
7	6	0.12425	24.1449	0.0519115	24.1449	32.1932	40.2414	0.00815	3	4
7	6	0.29415	20.3978	0.132415	23.7974	23.7974	23.7974	0.02835	7	7
7	6	0.59135	20.2926	0.161664	25.3657	27.0567	32.1299	0.0428	15	16
7	6	0.37095	18.8705	0.119288	32.3494	32.3494	26.9578	0.0003	12	12
7	6	1.0778	15.7729	0.0982557	24.1232	34.3292	25.051	0.05415	26	37
7	6	0.2147	23.2883	0.140429	32.6036	13.973	32.6036	0.01415	7	3
7	6	0.6048	19.8413	0.157573	29.7619	29.7619	29.7619	0.05275	18	18
7	6	0.37145	21.5372	0.127608	26.9215	24.2294	16.1529	0.10885	10	9
7	6	0.45565	19.752	0.149676	24.1413	28.5307	35.1147	0.01955	11	13
7	6	0.378	21.164	0.146032	29.1005	23.8095	23.8095	0.05125	11	9
7	6	0.2303	21.7108	0.0896657	56.4481	26.053	26.053	0.0081	13	6
7	6	0.4894	16.3465	0.0575194	14.3032	26.5631	34.7364	0.00225	7	13
6	6	0.49465	20.2163	0.181846	12.1298	16.1731	0	0.0095	6	8
6	6	0.2361	21.1775	0.159678	12.7065	21.1775	12.7065	0.0607	3	5
6	6	0.99365	17.1086	0.258995	12.0767	13.0831	10.0639	0.17545	12	13
6	6	0.2874	20.8768	0.193111	17.3974	27.8358	13.9179	0.0066	5	8
6	6	0.25545	19.5733	0.0598943	11.744	15.6586	23.488	0.01425	3	4
6	6	0.7411	14.8428	0.174066	31.0349	22.9389	24.2882	0.0425	23	17
6	6	0.1189	25.2313	0.105971	33.6417	25.2313	16.8209	0.01875	4	3
6	6	1.63755	18.9307	0.125004	22.5947	18.3201	17.0987	0.05265	37	30
6	6	0.1242	24.1546	0.0547504	24.1546	40.2576	24.1546	0.0441	3	5
6	6	0.44785	20.096	0.117673	15.6302	20.096	22.3289	0.0512	7	9
6	6	0.6852	18.9726	0.132005	13.1349	14.5943	11.6754	0.0009	9	10
6	6	0.6877	18.9036	0.146285	13.0871	17.4495	15.9953	0.1497	9	12
6	6	1.1503	19.1254	0.104016	13.0401	25.2108	9.56272	0.00215	15	29
6	6	0.43735	20.5785	0.163599	16.0055	2.2865	6.85949	0.08885	7	1
6	6	0.10555	28.4225	0.0232117	0	28.4225	37.8967	0.0177	0	3
6	6	0.26725	18.7091	0.161272	18.7091	7.48363	22.4509	0.037	5	2
6	6	0.1673	17.9319	0.0170353	17.9319	5.97729	5.97729	0.0093	3	1
6	6	0.3505	19.9715	0.15592	14.2653	8.5592	17.1184	0.0026	5	3
6	6	0.5297	18.8786	0.123277	16.9907	15.1029	9.43931	0.0728	9	8
6	6	0.63075	15.8541	0.161395	11.0979	9.51249	12.6833	0.08975	7	6
6	6	0.4771	18.864	0.149549	8.38399	12.576	8.38399	0.0497	4	6
6	6	0.60065	19.9784	0.138766	8.32432	11.654	8.32432	0.0123	5	7
6	6	1.01825	18.6595	0.159244	10.8028	7.85662	12.767	0.08155	11	8
6	6	0.20915	19.125	0.0382501	14.3438	19.125	0	0.25345	3	4
6	6	0.2183	22.9043	0.0453504	9.1617	9.1617	13.7426	0.01675	2	2
6	6	0.2078	24.0616	0.0738691	14.437	4.81232	19.2493	0.0296	3	1
6	6	0.2693	22.28	0.119941	11.14	3.71333	18.5667	0.0191	3	1
6	6	0.2121	23.5738	0.0664781	9.42951	9.42951	9.42951	0.0799	2	2
6	6	0.35635	19.6436	0.141855	8.41869	8.41869	8.41869	0.0131	3	3
6	6	0.18075	27.6625	0.0630705	33.195	16.5975	5.5325	0.00155	6	3
6	6	0.61995	16.1303	0.323171	8.06517	9.6782	12.9043	0.0154	5	6
6	6	0.28775	20.8514	0.178975	6.95048	10.4257	13.901	0.0177	2	3
6	6	0.25945	19.2715	0.267103	0	3.85431	7.70861	0.06055	0	1
6	6	0.24405	20.4876	0.0930137	4.09752	4.09752	12.2926	0.0194	1	1
6	6	1.003	17.9462	0.271934	8.97308	11.9641	11.9641	0.04875	9	12
6	6	0.23365	21.3995	0.136529	12.8397	21.3995	21.3995	0.0277	3	5
6	6	0.14395	20.8406	0.0316082	13.8937	0	20.8406	0.0657	2	0
6	6	0.29015	20.679	0.21868	13.786	13.786	13.786	0.05225	4	4
6	6	0.11045	27.1616	0.00316885	9.05387	9.05387	18.1077	0.0721	1	1
6	6	0.118	25.4237	0.0733051	25.4237	0	16.9492	0.07485	3	0
6	6	0.3715	18.8425	0.119246	16.1507	10.7672	13.459	0.0068	6	4
6	6	0.4147	19.2911	0.197733	16.8797	12.0569	9.64553	0.0826	7	5
6	6	0.43375	20.7493	0.158386	13.8329	2.30548	13.8329	0.14045	6	1
6	6	0.52375	17.1838	0.133842	15.2745	17.1838	24.821	0.001	8	9
6	6	0.2359	21.1954	0.17677	12.7173	21.1954	16.9563	0.0167	3	5
6	6	0.47595	18.9095	0.166509	10.5053	12.6064	14.7074	0.0963	5	6
6	6	0.35515	19.71	0.205406	11.2628	19.71	11.2628	0.086	4	7
6	6	0.3338	20.9706	0.146195	11.9832	14.979	14.979	0.0098	4	5
6	6	0.2093	19.1113	0.0360726	14.3335	9.55566	9.55566	0.01985	3	2
6	6	0.2786	21.5363	0.123833	17.9469	10.7681	14.3575	0.048	5	3
6	6	0.24475	16.3432	0.0114402	8.1716	16.3432	8.1716	0.0444	2	4
6	6	0.1541	19.4679	0.00324465	12.9786	25.9572	6.48929	0.14615	2	4
6	6	0.26575	22.5776	0.106679	3.76294	3.76294	7.52587	0.03265	1	1
6	6	0.1539	25.9909	0.0204678	0	12.9955	12.9955	0.07075	0	2
6	6	0.22385	22.3364	0.0641054	13.4018	17.8691	13.4018	0.0291	3	4
6	6	0.4162	19.2215	0.182605	12.0135	12.0135	9.61076	0.12	5	5
6	6	0.71935	16.6817	0.289497	12.5113	9.73101	6.95072	0.0257	9	7
6	6	0.38695	20.6745	0.194986	10.3373	10.3373	12.9216	0.1627	4	4
6	6	0.28965	20.7147	0.189021	17.2622	10.3573	10.3573	0.096	5	3
6	6	0.2207	22.6552	0.152016	13.5931	9.06208	0	0.5755	3	2
6	6	0.5004	19.984	0.185052	7.99361	13.9888	9.99201	0.0476	4	7
6	6	0.41395	16.9103	0.120546	14.4945	12.0788	14.4945	0.09085	6	5
6	6	0.2947	20.3597	0.155582	13.5731	13.5731	10.1798	0.03615	4	4
6	6	0.2046	24.4379	0.061828	9.77517	9.77517	4.88759	0.12245	2	2
6	6	0.15705	25.4696	0.147087	6.3674	12.7348	12.7348	0.08135	1	2
6	6	0.2025	24.6914	0.0375309	4.93827	14.8148	4.93827	0.0549	1	3
6	6	0.3449	17.3963	0.153668	23.1951	8.69817	17.3963	0.07835	8	3
6	6	0.17905	22.3401	0.0801452	0	0	0	0.63575	0	0
6	6	0.18805	21.2709	0.10795	0	0	0	0.22985	0	0
6	6	0.3637	19.2466	0.105032	0	0	2.74952	0.32525	0	0
6	6	0.4362	16.0477	0.0347318	2.29253	4.58505	0	0.7103	1	2
6	6	0.1728	17.3611	0.0474537	11.5741	5.78704	11.5741	0.0773	2	1
6	6	0.1296	23.1481	0.00810185	7.71605	0	0	0.2333	1	0
6	6	0.3044	22.9961	0.122865	3.28515	0	3.28515	0.0376	1	0
6	6	0.4056	19.7239	0.169995	0	9.86193	19.7239	0.048	0	4
6	6	0.28515	21.0416	0.158864	14.0277	10.5208	14.0277	0.04235	4	3
6	6	0.2957	20.2908	0.156747	0	10.1454	13.5272	0.02845	0	3
6	6	0.33405	20.9549	0.123485	5.98713	2.99356	5.98713	0.12275	2	1
6	6	0.1749	22.8702	0.067753	5.71755	0	17.1527	0.0659	1	0
6	6	0.27875	21.5247	0.090583	7.17489	10.7623	17.9372	0.0382	2	3
6	6	0.18485	21.6392	0.064647	16.2294	10.8196	5.40979	0.1828	3	2
6	6	0.31395	19.1113	0.11849	12.7409	19.1113	9.55566	0.0868	4	6
6	6	0.2882	20.8189	0.100278	6.93963	17.3491	13.8793	0.047	2	5
6	6	0.45765	19.6657	0.111002	4.37015	10.9254	10.9254	0.1463	2	5
6	6	0.17065	17.5798	0.0322297	11.7199	17.5798	5.85995	0.0575	2	3
6	6	0.29565	20.2943	0.127685	10.1471	6.76476	3.38238	0.21495	3	2
6	6	0.40385	17.3332	0.22496	2.47617	7.4285	9.90467	0.1225	1	3
6	6	0.9687	16.517	0.292144	9.2908	12.3877	10.3231	0.04945	9	12
6	6	0.32395	21.6083	0.0892113	9.26069	6.17379	3.0869	0.20875	3	2
6	6	0.2333	21.4316	0.0293613	0	8.57265	4.28633	0.11725	0	2
6	6	1.15985	15.5192	0.255507	6.89744	10.3462	7.75962	0.0694	8	12
6	6	0.276	21.7391	0.0893116	7.24638	10.8696	10.8696	0.0467	2	3
6	6	0.1186	25.2951	0.0632378	16.8634	0	0	0.1758	2	0
6	6	0.1166	25.729	0.0591767	25.729	0	0	0.185	3	0
6	6	0.28205	21.2728	0.107428	0	7.09094	10.6364	0.0938	0	2
6	6	0.2972	20.1884	0.142328	10.0942	0	13.459	0.0068	3	0
6	6	0.3055	22.9133	0.155319	6.54664	3.27332	3.27332	0.0801	2	1
6	6	0.47075	19.1184	0.112268	2.12427	8.49708	4.24854	0.3029	1	4
6	6	0.38155	18.3462	0.17193	5.24178	15.7253	0	0.42465	2	6
6	6	0.28555	17.5101	0.116617	0	7.00403	3.50201	0.27455	0	2
6	6	0.17565	22.7726	0.0859664	5.69314	11.3863	11.3863	0.0361	1	2
6	6	0.18545	21.5692	0.0773793	0	16.1769	10.7846	0.1406	0	3
6	6	0.26395	18.943	0.129949	15.1544	7.57719	11.3658	0.07165	4	2
6	6	0.2391	16.7294	0.0430782	12.5471	8.3647	16.7294	0.00655	3	2
6	6	0.4888	16.3666	0.220949	4.09165	4.09165	8.18331	0.01655	2	2
6	6	0.6605	16.654	0.206435	9.08403	7.57002	3.02801	0.34155	6	5
6	6	0.32605	18.4021	0.131728	3.06701	3.06701	15.3351	0.0699	1	1
6	6	0.4388	20.5105	0.13366	4.55789	6.83683	6.83683	0.18975	2	3
6	6	0.1242	24.1546	0.162641	8.05153	8.05153	8.05153	0.0753	1	1
6	6	0.62595	17.5733	0.204569	6.39029	11.183	9.58543	0.11205	4	7
6	6	0.96905	16.511	0.156287	9.28745	8.25551	8.25551	0.00605	9	8
6	6	0.27395	21.9018	0.103121	18.2515	10.9509	10.9509	0.0837	5	3
6	6	0.14625	20.5128	0.00683761	13.6752	0	6.83761	0.09775	2	0
6	6	0.8393	15.4891	0.101156	7.14881	8.34028	7.14881	0.0407	6	7
6	6	0.43075	18.5723	0.105978	13.9292	11.6077	9.28613	0.04125	6	5
6	6	0.4084	19.5886	0.112512	2.44858	9.79432	9.79432	0.00995	1	4
6	6	0.51875	19.2771	0.153928	15.4217	5.78313	9.63855	0.007	8	3
6	6	0.47655	20.9842	0.0854055	4.19683	8.39366	8.39366	0.2055	2	4
6	6	0.40975	19.5241	0.130079	9.76205	7.32154	2.44051	0.1908	4	3
6	6	0.16785	23.8308	0.134644	0	5.9577	11.9154	0.0284	0	1
6	6	0.10835	27.688	0.00323027	9.22935	0	27.688	0.02835	1	0
6	6	0.78715	19.0561	0.120117	12.7041	5.08162	5.08162	0.2043	10	4
6	6	0.10925	27.46	0.0196796	9.15332	9.15332	18.3066	0.02725	1	1
6	6	0.33315	18.0099	0.0556806	9.00495	3.00165	3.00165	0.1745	3	1
6	6	0.17675	16.9731	0.0381895	5.65771	22.6308	5.65771	0.0883	1	4
6	6	0.2994	20.0401	0.0544422	3.34001	3.34001	6.68003	0.118	1	1
6	6	0.1658	24.1255	0.103136	6.03136	12.0627	24.1255	0.0005	1	2
6	6	0.788	15.2284	0.128426	2.53807	8.88325	3.80711	0.5803	2	7
6	6	0.74175	17.5261	0.138052	2.69633	4.04449	6.74082	0.0373	2	3
6	6	0.4352	20.6801	0.127528	13.7868	4.59559	16.0846	0.01445	6	2
6	6	0.1151	26.0643	0.0086881	0	17.3762	8.6881	0.0017	0	2
6	6	0.23585	21.1999	0.0549078	8.47997	16.9599	12.7199	0.01585	2	4
6	6	0.5447	18.3587	0.150542	7.34349	11.0152	12.8511	0.06325	4	6
6	6	0.61325	17.9372	0.141704	3.26131	14.6759	11.4146	0.0719	2	9
6	6	0.29785	20.1444	0.112473	13.4296	13.4296	6.71479	0.13465	4	4
6	6	0.534	18.7266	0.103464	7.49064	7.49064	5.61798	0.0387	4	4
6	6	0.47875	18.799	0.145274	10.4439	8.35509	6.26632	0.07475	5	4
6	6	0.1804	22.1729	0.0884146	0	11.0865	11.0865	0.052	0	2
6	6	0.21995	22.7324	0.0545579	18.186	4.54649	4.54649	0.05805	4	1
6	6	0.26485	22.6543	0.0556919	11.3272	11.3272	11.3272	0.1519	3	3
6	6	0.1137	26.3852	0.0637643	8.79507	8.79507	17.5901	0.0463	1	1
6	6	0.2614	19.1278	0.149197	11.4767	7.65111	0	0.30845	3	2
6	6	0.46385	19.4028	0.14218	10.7793	12.9352	19.4028	0.0073	5	6
6	6	0.71	16.9014	0.289648	7.04225	9.85915	5.6338	0.17715	5	7
6	6	0.91635	16.3693	0.270748	8.73029	10.9129	5.45643	0.06645	8	10
6	6	0.18895	21.1696	0.0235512	0	10.5848	10.5848	0.0732	0	2
6	6	0.3366	20.7962	0.099079	5.94177	2.97089	11.8835	0.04545	2	1
6	6	0.10095	29.7177	0.0307083	0	9.90589	0	0.68955	0	1
6	6	0.28255	21.2352	0.154309	10.6176	10.6176	14.1568	0.03775	3	3
6	6	0.10205	29.3974	0.0372366	39.1965	0	9.79912	0.0607	4	0
6	6	0.29465	23.757	0.0767012	10.1816	13.5754	3.39386	0.2015	3	4
6	6	0.4787	20.8899	0.241278	6.26697	18.8009	10.445	0.01325	3	9
6	6	0.2645	18.9036	0.026087	11.3422	3.78072	7.56144	0.07595	3	1
6	6	0.27195	22.0629	0.0963412	3.67715	11.0314	11.0314	0.03415	1	3
6	6	0.1102	27.2232	0.0272232	27.2232	9.07441	9.07441	0.0923	3	1
6	6	0.2533	19.7394	0.133439	0	15.7916	7.89578	0.03275	0	4
6	6	0.11315	26.5135	0.0190013	0	17.6757	0	0.23445	0	2
6	6	0.4272	16.3858	0.174977	14.0449	16.3858	11.7041	0.00845	6	7
6	6	1.04165	18.2403	0.251092	10.5602	5.76009	9.60015	0.0715	11	6
6	6	0.1791	22.3339	0.0728643	0	5.58347	5.58347	0.0008	0	1
6	6	0.43545	18.3718	0.0394994	2.29647	9.1859	13.7788	0.01485	1	4
6	6	0.2356	21.2224	0.0789474	4.24448	12.7334	0	0.24325	1	3
6	6	0.26375	22.7488	0.055545	11.3744	7.58294	15.1659	0.04285	3	2
6	6	0.3798	21.0637	0.0635861	10.5319	5.26593	7.89889	0.2969	4	2
6	6	0.22325	22.3964	0.136618	0	22.3964	17.9171	0.0561	0	5
6	6	0.3902	23.0651	0.109431	10.2512	10.2512	5.12558	0.1235	4	4
6	6	0.29075	20.6363	0.132932	3.43938	6.87876	17.1969	0.0617	1	2
6	6	0.55085	18.1538	0.183807	16.3384	10.8923	14.523	0.0196	9	6
6	6	0.711	18.2841	0.274613	12.6582	12.6582	15.4712	0.0287	9	9
6	6	0.86835	17.2741	0.173029	14.9709	5.75805	10.3645	0.1678	13	5
6	6	0.36365	19.2493	0.151382	10.9996	13.7495	10.9996	0.01065	4	5
6	6	0.36405	19.2281	0.166323	16.4813	16.4813	10.9875	0.11195	6	6
6	6	0.3244	18.4957	0.209309	12.3305	12.3305	6.16523	0.22745	4	4
6	6	0.2894	20.7326	0.131824	10.3663	17.2771	20.7326	0.00275	3	5
6	6	0.2904	20.6612	0.16064	3.44353	10.3306	6.88705	0.1696	1	3
6	6	0.1793	22.309	0.0786392	16.7317	11.1545	0	0.1809	3	2
6	6	0.8283	16.9021	0.238501	21.7313	16.9021	14.4875	0.0043	18	14
6	6	0.31925	15.6617	0.130932	18.794	12.5294	15.6617	0.0141	6	4
6	6	0.3466	20.1962	0.0927582	14.4259	8.65551	14.4259	0.01535	5	3
6	6	0.3728	18.7768	0.0895923	8.04721	13.412	18.7768	0.18755	3	5
6	6	0.6771	17.7226	0.0982868	16.2458	8.86132	8.86132	0.0096	11	6
6	6	0.2302	21.7202	0.0473501	13.0321	21.7202	13.0321	0.0151	3	5
6	6	0.5555	19.802	0.0845185	14.4014	9.0009	19.802	0.03885	8	5
6	6	0.36455	19.2018	0.198875	5.48622	16.4586	10.9724	0.03905	2	6
6	6	0.22415	22.3065	0.0794111	8.9226	13.3839	17.8452	0.0396	2	3
6	6	0.16365	18.3318	0.00641613	12.2212	0	30.553	0.03715	2	0
5	6	0.20945	19.0976	0.00477441	23.872	14.3232	0	0.00085	5	3
5	6	0.34535	17.3737	0.0845519	23.1649	11.5825	23.1649	-0.0001	8	4
5	6	1.33965	16.4222	0.0914791	17.1687	19.4081	23.8868	0.19945	23	26
5	6	0.1922	15.6087	0.00260146	15.6087	36.4204	31.2175	0.04125	3	7
5	6	0.27015	18.5082	0.0303535	11.1049	40.7181	51.8231	0.00045	3	11
5	6	0.12885	23.2829	0.0473419	7.76096	31.0438	23.2829	0.01465	1	4
5	6	0.37	13.5135	0.0340541	27.027	5.40541	27.027	0.01775	10	2
5	6	0.33785	20.7193	0.140595	50.3182	38.4786	20.7193	0.03745	17	13
5	6	0.37635	18.5997	0.129932	13.2855	31.8852	15.9426	0.11405	5	12
5	6	1.58765	17.0063	0.158536	23.9347	23.9347	27.0841	0.05465	38	38
5	6	0.1296	23.1481	0.0524691	46.2963	7.71605	23.1481	0.03375	6	1
5	6	0.1253	23.9425	0.00399042	23.9425	15.9617	7.98085	0.0909	3	2
5	6	0.6184	9.70246	0.0306436	25.8732	38.8098	17.7878	0.0747	16	24
5	6	0.30335	19.7791	0.0629636	16.4826	16.4826	23.0757	0.0142	5	5
5	6	0.7686	13.0107	0.0500911	18.2149	22.1181	19.516	0.05135	14	17
5	6	0.8923	12.3277	0.0740222	24.6554	26.8968	32.5003	0.01225	22	24
5	6	0.2437	20.517	0.0303652	8.20681	12.3102	41.0341	0.00785	2	3
5	6	0.1093	27.4474	0.00457457	36.5965	9.14913	0	0.14595	4	1
5	6	0.4061	14.7747	0.0174834	39.3992	32.0118	22.162	0.0373	16	13
5	6	1.78755	13.9856	0.088473	26.8524	28.5307	30.2089	0.0097	48	51
5	6	0.81855	14.6601	0.0619999	41.5369	19.5468	28.0985	0.0552	34	16
5	6	0.54435	12.8594	0.0451915	29.3929	18.3705	25.7187	0.0095	16	10
5	6	0.20605	19.4128	0.00461053	9.70638	29.1191	24.266	0.02075	2	6
5	6	0.3991	17.5395	0.0791782	32.5733	27.562	30.0677	0.0053	13	11
5	6	1.5552	13.5031	0.0967078	27.6492	25.7202	24.4342	0.0862	43	40
5	6	0.45275	17.6698	0.0416345	19.8785	19.8785	22.0872	0.02945	9	9
5	6	0.23365	21.3995	0.0560668	38.5192	25.6794	42.7991	0.0044	9	6
5	6	0.1237	24.2522	0.00404204	48.5044	16.1681	24.2522	0.08385	6	2
5	6	0.25045	15.9713	0.0325414	3.99281	11.9784	47.9138	0.03675	1	3
5	6	0.36385	16.4903	0.0809399	38.4774	30.2322	10.9935	0.0441	14	11
5	6	0.1796	22.2717	0.0453786	38.9755	16.7038	27.8396	0.03235	7	3
5	6	0.5783	15.5629	0.0788518	34.5841	20.7505	25.9381	0.0279	20	12
5	6	1.24865	16.8182	0.134225	30.4329	26.4285	29.632	0.03	38	33
5	6	0.3158	18.9994	0.0604813	22.1659	34.8322	34.8322	0.06275	7	11
5	6	1.06005	16.037	0.0813169	31.1306	26.4138	21.6971	0.0563	33	28
5	6	0.62185	14.4729	0.0240412	25.7297	19.2973	12.8648	0.0466	16	12
5	6	0.5282	13.2526	0.0423135	30.2916	22.7187	32.1848	0.0652	16	12
5	6	0.1372	21.8659	0.00364431	43.7318	36.4431	14.5773	0.02905	6	5
5	6	2.40745	13.7074	0.0753494	24.9226	21.1842	25.338	0.0168	60	51
5	6	0.2775	14.4144	0.0252252	18.018	14.4144	14.4144	0.06275	5	4
5	6	0.13995	21.4362	0.052876	21.4362	14.2908	21.4362	0.0229	3	2
5	6	0.2852	14.0252	0.0715288	24.5442	28.0505	14.0252	0.0617	7	8
5	6	0.28935	13.8241	0.033869	38.0162	24.1922	31.1042	0.0005	11	7
5	6	0.3435	11.6448	0.0163028	17.4672	26.2009	20.3785	0.02165	6	9
5	6	0.43385	16.1346	0.0670739	27.6593	13.8297	18.4396	0.0646	12	6
5	6	0.59905	13.3545	0.0575912	15.0238	20.0317	23.3703	0.0132	9	12
5	6	0.26505	15.0915	0.0514997	18.8644	26.4101	22.6372	0.0382	5	7
5	6	0.9177	16.3452	0.0755694	19.6143	29.4214	25.0627	0.01625	18	27
5	6	2.0151	12.9026	0.0669942	27.7902	22.3314	28.7827	0.0257	56	45
5	6	0.1738	23.015	0.0362486	5.75374	17.2612	17.2612	0.07505	1	3
5	6	0.3509	17.0989	0.00569963	19.9487	25.6483	14.2491	0.02285	7	9
5	6	1.2045	13.2835	0.0748858	28.2275	21.5857	24.9066	0.00195	34	26
5	6	1.68945	12.4301	0.0789606	24.2683	21.9006	18.9411	0.0794	41	37
5	6	0.5571	16.1551	0.0540298	21.5401	16.1551	19.7451	0.09155	12	9
5	6	0.1137	26.3852	0.00439754	17.5901	17.5901	8.79507	0.0128	2	2
5	6	0.23505	17.0177	0.00446713	17.0177	17.0177	21.2721	0.01785	4	4
5	6	0.64035	14.0548	0.0473179	14.0548	23.4247	28.1096	0.0076	9	15
5	6	4.12585	14.7848	0.0790383	21.8137	25.2069	25.4493	0.0146	90	104
5	6	0.23335	12.8562	0.00299979	0	21.427	51.4249	0.04725	0	5
5	6	0.3057	13.0847	0.00343474	45.7965	29.4406	16.3559	0.0024	14	9
5	6	1.057	11.3529	0.0340587	19.8675	20.8136	20.8136	0.02325	21	22
5	6	1.5584	14.117	0.0763925	19.2505	25.6674	28.2341	5e-05	30	40
5	6	0.1865	21.4477	0.145845	85.7909	101.877	85.7909	0.0039	16	19
5	6	0.2028	19.7239	0.0517751	34.5168	29.5858	19.7239	0.0617	7	6
5	6	0.4859	14.4063	0.0595802	26.7545	30.8705	39.1027	0.04035	13	15
5	6	0.1283	23.3827	0.0775526	46.7654	38.9712	23.3827	0.00595	6	5
5	6	0.3197	18.7676	0.0523929	18.7676	28.1514	25.0235	0.04035	6	9
5	6	0.1364	21.9941	0.0417889	21.9941	7.33138	14.6628	0.03575	3	1
5	6	0.84995	14.1185	0.0684158	20.0012	22.3543	30.59	0.01785	17	19
5	6	0.445	17.9775	0.0183146	24.7191	15.7303	24.7191	0.0277	11	7
5	6	2.3522	12.754	0.0656407	26.3583	21.6818	30.1845	0.01135	62	51
5	6	0.2049	19.5217	0.033919	14.6413	29.2826	24.4021	0.0121	3	6
5	6	0.3925	12.7389	0.0433121	25.4777	17.8344	30.5732	0.06985	10	7
5	6	0.9784	12.2649	0.0663839	20.4415	23.5078	16.3532	0.0202	20	23
5	6	0.60705	19.7677	0.120007	28.0043	13.1785	24.7097	0.10885	17	8
5	6	0.45795	17.4692	0.0764276	19.6528	21.8364	30.571	0.0283	9	10
5	6	0.5566	16.1696	0.109145	26.9493	25.1527	32.3392	0.05065	15	14
5	6	1.7532	14.83	0.0848163	27.3785	25.097	34.2231	0.0909	48	44
5	6	0.9442	13.7683	0.0733955	27.5365	15.8865	31.7729	0.0204	26	15
5	6	0.40715	9.82439	0.00233329	31.9293	39.2976	46.6658	0.01485	13	16
5	6	0.8039	14.9272	0.0495708	38.562	27.3666	43.5378	0.00855	31	22
5	6	2.17125	15.1986	0.108578	34.5423	22.5676	26.2522	0.02155	75	49
5	6	0.16725	23.9163	0.00597907	29.8954	17.9372	23.9163	0.08695	5	3
5	6	0.32635	15.321	0.0615903	18.3852	27.5778	33.7061	0.0245	6	9
5	6	0.7037	15.6317	0.0761688	25.5791	36.9476	22.737	0.0457	18	26
5	6	1.1747	16.1743	0.106282	34.0512	32.3487	26.3897	0.0429	40	38
5	6	1.8083	16.0372	0.119587	29.3093	33.7333	29.3093	0.0793	53	61
5	6	0.14065	21.3295	0.0387487	21.3295	0	21.3295	0.0024	3	0
5	6	0.4107	17.0441	0.0678111	14.6092	17.0441	34.0881	0.00265	6	7
5	6	0.6099	14.7565	0.0784555	21.315	31.1526	27.8734	0.0047	13	19
5	6	0.61125	16.3599	0.076319	16.3599	29.4479	32.7198	0.0269	10	18
5	6	0.8646	12.7226	0.0475943	28.9151	25.4453	35.8547	0.0132	25	22
5	6	0.17995	22.2284	0.10753	27.7855	22.2284	27.7855	0.10715	5	4
5	6	0.37005	18.9164	0.0367518	24.321	21.6187	24.321	0.0589	9	8
5	6	0.96655	13.4499	0.0910455	24.8306	16.5537	20.6922	0.0061	24	16
5	6	2.5784	14.7378	0.0879227	25.9851	25.9851	28.3121	0.05945	67	67
5	6	0.24835	20.1329	0.109926	8.05315	12.0797	12.0797	0.04975	2	3
5	6	0.97405	14.373	0.0474822	33.8792	25.666	32.8525	0.08745	33	25
5	6	0.26055	19.1902	0.104203	19.1902	23.0282	42.2184	0.0057	5	6
5	6	0.1827	21.8938	0.0793651	27.3673	27.3673	21.8938	0.0857	5	5
5	6	0.2221	18.0099	0.00427735	31.5173	45.0248	22.5124	0.0417	7	10
5	6	3.38655	17.1266	0.134429	30.4144	24.5087	28.3474	0.01605	103	83
4	7	0.28555	28.0161	0.129925	7.00403	3.50201	0	0.0731	2	1
4	7	0.2829	24.7437	0.0546129	7.06964	3.53482	7.06964	0.13745	2	1
4	7	0.8375	17.9104	0.0640597	4.77612	4.77612	5.97015	0.0704	4	4
4	7	0.1746	28.6369	0.029496	11.4548	0	5.72738	0.13705	2	0
4	7	0.41245	19.3963	0.0892229	9.69815	2.42454	4.84907	0.0013	4	1
4	7	0.22805	21.925	0.050866	4.385	4.385	4.385	0.13325	1	1
4	7	0.09665	31.0398	0.00465598	0	0	10.3466	0.0733	0	0
4	7	0.8283	21.7313	0.169564	9.65834	8.45104	9.65834	0.0147	8	7
4	7	0.3303	21.1929	0.0740236	3.02755	3.02755	6.0551	0.17345	1	1
4	7	0.3249	24.623	0.114805	9.23361	9.23361	9.23361	0.073	3	3
4	7	0.27905	25.0851	0.0885146	3.58359	3.58359	7.16717	0.0625	1	1
4	7	0.7762	21.9016	0.162651	5.15331	5.15331	6.44164	0.12125	4	4
4	7	0.2955	20.3046	0.00575296	3.38409	3.38409	10.1523	0.0512	1	1
4	7	0.5545	19.8377	0.153832	7.21371	5.41028	5.41028	0.0302	4	3
4	7	0.24885	20.0924	0.087603	4.01849	0	0	0.0862	1	0
4	7	0.18315	21.84	0.0685231	0	0	5.46001	0.1604	0	0
4	7	0.13115	22.8746	0.00304994	0	0	0	0.3846	0	0
4	7	0.18015	22.2037	0.0480155	0	5.55093	5.55093	0.0357	0	1
4	7	0.1945	20.5656	0.0365039	0	5.14139	0	0.5149	0	1
4	7	0.24355	20.5297	0.134675	0	0	4.10593	0.0526	0	0
4	7	0.1174	25.5537	0.0285349	0	0	0	1.88065	0	0
4	7	0.13255	22.633	0.0396077	0	7.54432	0	0.2787	0	1
4	7	0.1991	25.113	0.061778	0	5.0226	0	0.208	0	1
4	7	0.11145	26.9179	0.00403769	0	8.97263	0	0.2534	0	1
4	7	0.11425	26.2582	0.0450766	0	17.5055	0	0.3253	0	2
4	7	0.119	25.2101	0.0365546	8.40336	8.40336	8.40336	0.0753	1	1
4	7	0.1344	22.3214	0.00297619	0	7.44048	0	0.23145	0	1
4	7	0.1827	21.8938	0.129995	5.47345	5.47345	16.4204	0.09725	1	1
4	7	0.12025	24.948	0.0490644	8.31601	0	8.31601	0.11935	1	0
4	7	0.1811	22.0872	0.0789619	5.52181	5.52181	5.52181	0.03945	1	1
4	7	0.1085	27.6498	0.0645161	9.21659	0	0	0.42975	1	0
4	7	0.1204	24.9169	0.0211794	0	8.30565	8.30565	0.10335	0	1
4	7	0.1117	26.8577	0.112802	0	0	8.95255	0.03565	0	0
4	7	0.22375	17.8771	0.0145251	4.46927	4.46927	0	0.70425	1	1
4	7	0.1842	27.1444	0.0627036	10.8578	0	5.42888	0.0662	2	0
4	7	0.194	20.6186	0.0837629	10.3093	5.15464	10.3093	0.08705	2	1
4	7	0.15705	25.4696	0.0900987	12.7348	6.3674	0	0.2547	2	1
4	7	0.13345	22.4803	0.0363432	7.49344	0	7.49344	0.0119	1	0
4	7	0.12675	23.6686	0.0035503	7.88955	0	0	0.15755	1	0
4	7	0.1125	26.6667	0.0631111	8.88889	17.7778	0	0.1635	1	2
4	7	0.1069	28.0636	0.0664172	9.35454	9.35454	0	0.29005	1	1
4	7	0.17085	23.4124	0.0927714	5.85309	5.85309	11.7062	0.0532	1	1
4	7	0.2244	22.2816	0.0666221	4.45633	4.45633	4.45633	0.04325	1	1
4	7	0.2583	19.3573	0.0776229	3.87147	7.74293	7.74293	0.11695	1	2
4	7	0.1226	24.4698	0.0534258	8.15661	0	8.15661	0.0734	1	0
4	7	0.24415	24.5751	0.0505837	4.09584	8.19169	16.3834	0.07275	1	2
4	7	0.2084	19.1939	0.0710173	0	14.3954	4.79846	0.0431	0	3
4	7	0.3429	17.4978	0.0898221	5.8326	2.9163	0	0.4993	2	1
4	7	0.2297	21.7675	0.0877231	0	0	8.70701	0.1328	0	0
4	7	0.5424	16.5929	0.103614	5.53097	3.68732	1.84366	0.0523	3	2
4	7	0.182	21.978	0.0274725	10.989	10.989	0	0.2412	2	2
4	7	0.39225	17.8458	0.0628426	12.747	7.64818	10.1976	0.0402	5	3
4	7	0.1756	22.779	0.0726082	5.69476	0	5.69476	0.1731	1	0
4	7	0.29125	17.1674	0.106094	6.86695	6.86695	6.86695	0.0913	2	2
4	7	0.3077	19.4995	0.0851479	6.49984	6.49984	0	0.43165	2	2
4	7	0.49775	18.0814	0.0977398	2.00904	0	2.00904	0.09215	1	0
4	7	0.41785	16.7524	0.0768218	9.57281	14.3592	7.17961	0.0612	4	6
4	7	0.47825	16.7277	0.060115	6.27287	4.18191	8.36383	0.034	3	2
4	7	0.34595	14.453	0.103483	5.78118	5.78118	8.67177	0.0448	2	2
4	7	0.18615	21.488	0.0333065	5.37201	10.744	5.37201	0.1138	1	2
4	7	0.47895	14.6153	0.0865435	8.3516	4.1758	4.1758	0.0736	4	2
4	7	0.1553	25.7566	0.00998068	19.3175	12.8783	12.8783	0.04405	3	2
4	7	0.28555	21.0121	0.0374715	10.506	14.0081	3.50201	0.1252	3	4
4	7	0.41875	16.7164	0.134567	9.55224	14.3284	14.3284	0.02965	4	6
4	7	0.34685	17.2985	0.0203258	8.64927	25.9478	5.76618	0.04625	3	9
4	7	0.22285	22.4366	0.070451	0	0	13.462	0.01515	0	0
4	7	0.43205	16.2018	0.107626	11.5727	13.8873	6.94364	0.05175	5	6
4	7	0.3306	24.1984	0.11706	9.07441	6.04961	3.0248	0.09155	3	2
4	7	0.3741	18.7116	0.0653569	2.67308	10.6923	10.6923	0.1759	1	4
4	7	0.29825	16.7645	0.0335289	10.0587	0	10.0587	0.0186	3	0
4	7	0.39685	17.6389	0.107093	5.03969	0	5.03969	0.0598	2	0
4	7	0.25035	23.9664	0.108248	11.9832	0	7.98882	0.02455	3	0
4	7	0.1191	25.1889	0.0843829	8.39631	8.39631	16.7926	0.0119	1	1
4	7	0.1237	24.2522	0.104689	8.08407	0	16.1681	0.06065	1	0
4	7	0.2503	19.976	0.104075	3.99521	3.99521	11.9856	0.0142	1	1
4	7	0.16235	24.6381	0.0517401	6.15953	6.15953	6.15953	0.039	1	1
4	7	0.2381	16.7997	0.0201596	4.19992	16.7997	12.5997	0.0345	1	4
4	7	0.279	17.9211	0.0682796	10.7527	3.58423	3.58423	0.1206	3	1
4	7	0.1652	24.2131	0.0590194	12.1065	6.05327	0	0.1712	2	1
4	7	0.40105	14.9607	0.0243112	17.4542	4.98691	12.4673	0.019	7	2
4	7	0.3583	16.7457	0.0400502	11.1638	8.37287	5.58191	0.16385	4	3
4	7	0.18945	21.1138	0.112431	10.5569	5.27844	10.5569	0.00955	2	1
4	7	0.32495	18.4644	0.0698569	9.23219	9.23219	9.23219	0.0289	3	3
4	7	0.3438	17.452	0.0715532	8.726	11.6347	8.726	0.1046	3	4
4	7	0.4315	13.905	0.0821553	9.26999	6.95249	6.95249	0.17955	4	3
4	7	0.16985	23.5502	0.0135414	17.6626	11.7751	5.88755	0.02335	3	2
4	7	0.47455	18.9653	0.0926141	8.42904	4.21452	12.6436	0.01175	4	2
4	7	0.1797	22.2593	0.0570395	16.6945	11.1297	11.1297	0.0702	3	2
3	5	0.65015	19.9954	0.320695	19.9954	18.4573	0	0.03075	13	12
3	5	0.10075	29.7767	0.0406948	19.8511	19.8511	9.92556	0.014	2	2
3	5	0.73175	17.7656	0.160916	16.399	8.19952	8.19952	0.00785	12	6
3	5	0.49555	16.1437	0.122692	16.1437	16.1437	10.0898	0.0177	8	8
3	5	0.15465	25.8649	0.0695118	19.3986	19.3986	12.9324	0.0398	3	3
3	5	0.7416	17.5297	0.126753	18.8781	18.8781	14.8328	0.13915	14	14
3	5	0.2948	23.7449	0.181309	13.5685	13.5685	16.9607	0.03085	4	4
3	5	0.72915	19.2004	0.3825	20.5719	13.7146	17.829	0.0403	15	10
3	5	0.9928	20.145	0.19868	16.116	17.1233	19.1378	0.00535	16	17
3	5	0.17975	27.8164	0.106537	5.56328	22.2531	16.6898	0.08625	1	4
3	5	0.2486	24.1352	0.214602	28.1577	20.1126	16.0901	0.0244	7	5
3	5	1.13535	20.2581	0.167702	22.9004	13.2118	14.9734	0.06155	26	15
3	5	0.1028	29.1829	0.0671206	19.4553	9.72763	19.4553	0.04645	2	1
3	5	0.2162	23.1267	0.100139	9.25069	27.7521	18.5014	0.0351	2	6
3	5	0.28915	20.7505	0.224451	17.2921	13.8337	20.7505	0.01735	5	4
3	5	1.12145	18.7258	0.162022	19.6175	15.1589	15.1589	0.0632	22	17
3	5	0.36345	22.0113	0.245976	16.5085	11.0056	19.2599	0.01145	6	4
3	5	0.81885	20.7608	0.209562	10.991	12.2122	14.6547	0.05145	9	10
3	5	0.44025	22.7144	0.169222	18.1715	13.6286	13.6286	0.0007	8	6
3	5	0.7736	18.0972	0.128555	18.0972	18.0972	14.2192	0.07485	14	14
3	5	1.1827	21.1381	0.276824	11.8373	11.8373	10.1463	0.14905	14	14
3	5	0.99075	17.1587	0.299319	9.08403	13.1214	18.1681	0.07805	9	13
3	5	0.71395	19.6092	0.154843	16.8079	16.8079	18.2086	0.1022	12	12
3	5	0.50515	19.7961	0.32426	17.8165	19.7961	13.8573	0.0115	9	10
3	5	0.99995	20.001	0.268613	10.0005	18.0009	14.0007	0.0947	10	18
3	5	0.4774	20.9468	0.178676	12.5681	10.4734	10.4734	0.08085	6	5
3	5	0.68195	19.063	0.15331	16.1302	11.7311	8.7983	0.0792	11	8
3	5	0.35585	22.4814	0.137839	14.0509	8.43052	5.62035	0.0166	5	3
3	5	0.98915	19.2084	0.367791	12.1316	19.2084	15.1645	0.0038	12	19
3	5	0.39905	22.5536	0.253853	10.0238	15.0357	17.5417	0.0315	4	6
3	5	1.1725	18.7633	0.300938	13.6461	15.3518	11.9403	0.0289	16	18
3	5	0.1491	26.8276	0.126761	13.4138	20.1207	0	0.19155	2	3
3	5	0.45435	19.8085	0.118521	8.80379	11.0047	11.0047	0.15325	4	5
3	5	1.06915	20.5771	0.188842	14.0298	17.7711	13.0945	0.00345	15	19
3	5	1.0146	17.741	0.216785	14.7842	9.8561	16.7554	0.0705	15	10
3	5	0.25025	23.976	0.0883117	15.984	15.984	11.988	0.0179	4	4
3	5	0.7413	20.2347	0.213139	8.09389	16.1878	9.44287	0.17045	6	12
3	5	0.40895	22.0076	0.176794	12.2264	14.6717	14.6717	0.1001	5	6
3	5	0.36725	21.7835	0.149489	13.6147	16.3376	13.6147	0.0154	5	6
3	5	0.31685	22.0925	0.143285	12.6243	15.7803	12.6243	0.1012	4	5
3	5	1.09065	21.0883	0.175079	12.8364	13.7533	15.587	0.10385	14	15
3	5	0.1286	31.1042	0.132193	15.5521	15.5521	0	0.1877	2	2
3	5	0.3821	20.9369	0.139754	7.85135	10.4685	15.7027	0.0052	3	4
3	5	0.2641	22.7187	0.198788	3.78644	15.1458	15.1458	0.12605	1	4
3	5	0.1326	30.1659	0.0395928	7.54148	7.54148	15.083	0.041	1	1
3	5	0.39385	22.8513	0.215691	10.1562	10.1562	10.1562	0.2044	4	4
3	5	0.3004	23.3023	0.155126	13.3156	16.6445	9.98668	0.035	4	5
3	5	1.39515	20.0695	0.190051	13.6186	15.0521	15.7689	0.04035	19	21
3	5	0.09625	31.1688	0.0831169	20.7792	0	10.3896	0.0869	2	0
3	5	0.39335	22.8804	0.200585	17.7959	15.2536	7.6268	0.0965	7	6
3	5	0.3885	20.592	0.14157	7.72201	18.018	12.87	0.0248	3	7
3	5	0.2958	23.6646	0.144692	13.5227	30.426	13.5227	0.0592	4	9
3	5	0.3513	22.7726	0.180615	8.53971	14.2328	8.53971	0.035	3	5
3	5	1.43035	19.5756	0.181424	11.1861	13.9826	13.9826	0.0777	16	20
3	5	0.0923	32.5027	0.0839653	21.6685	21.6685	10.8342	0.063	2	2
3	5	0.3475	23.0216	0.195108	17.2662	25.8993	17.2662	0.07435	6	9
3	5	0.5803	20.679	0.189557	15.5092	10.3395	12.0627	0.02125	9	6
3	5	1.2434	17.6934	0.166841	12.8679	12.8679	17.6934	0.1756	16	16
3	5	0.4444	20.252	0.202183	11.2511	15.7516	22.5023	0.15635	5	7
3	5	0.39205	20.4056	0.12677	12.7535	15.3042	12.7535	0.0747	5	6
3	5	0.30145	23.2211	0.118262	9.9519	13.2692	13.2692	0.1529	3	4
3	5	0.4257	23.4907	0.184637	16.4435	11.7454	11.7454	0.08195	7	5
3	5	0.34955	20.0257	0.143899	8.58246	14.3041	2.86082	0.2449	3	5
3	5	0.4456	22.4417	0.182563	4.48833	8.97666	11.2208	0.03635	2	4
3	5	0.5155	21.3385	0.277886	15.5189	13.579	7.75946	0.01325	8	7
3	5	0.27095	22.1443	0.123455	11.0722	11.0722	22.1443	0.0854	3	3
3	5	0.7792	19.2505	0.155031	17.9671	7.70021	14.117	0.02525	14	6
3	5	0.25045	23.9569	0.18307	15.9713	11.9784	15.9713	0.06585	4	3
3	5	0.18455	21.6743	0.179897	5.41859	5.41859	0	0.11995	1	1
3	5	0.9199	17.3932	0.102239	14.132	15.219	16.3061	0.13455	13	14
3	5	0.2554	15.6617	0.027408	19.5771	23.4926	27.408	0.02415	5	6
3	5	0.5005	15.984	0.107293	11.988	19.98	17.982	0.09485	6	10
3	5	0.42695	14.0532	0.0681579	16.3954	16.3954	16.3954	0.0115	7	7
3	5	0.2679	22.3964	0.18645	11.1982	18.6637	7.46547	0.184	3	5
3	5	0.72615	16.5255	0.11437	16.5255	22.034	17.9026	0.05765	12	16
3	5	0.15875	25.1969	0.0579528	18.8976	25.1969	31.4961	0.00545	3	4
3	5	0.3323	18.056	0.0452904	21.0653	18.056	12.0373	0.1284	7	6
3	5	0.3401	20.5822	0.19656	23.5225	11.7612	26.4628	0.0212	8	4
3	5	0.1649	24.2571	0.0936931	12.1286	12.1286	18.1928	0.0169	2	2
3	5	0.43555	16.0716	0.0258294	11.4797	22.9595	16.0716	0.10355	5	10
3	5	0.2845	17.5747	0.0940246	7.02988	28.1195	10.5448	0.02425	2	8
3	5	0.25645	19.497	0.152271	19.497	11.6982	27.2958	0.02205	5	3
3	5	0.5626	17.7746	0.147174	19.5521	12.4422	21.3295	0.0215	11	7
3	5	0.2765	18.0832	0.0282098	14.4665	10.8499	18.0832	0.0287	4	3
3	5	1.1022	14.5164	0.0811105	19.9601	14.5164	16.331	0.0747	22	16
3	5	0.11395	26.3273	0.00877578	8.77578	0	26.3273	0.0469	1	0
3	5	0.1059	28.3286	0.0354108	18.8857	9.44287	18.8857	0.00035	2	1
3	5	0.1542	25.9403	0.0823606	12.9702	25.9403	12.9702	0.052	2	4
3	5	0.2135	14.0515	0.00210773	23.4192	14.0515	14.0515	0.03185	5	3
3	5	0.35165	19.9062	0.17944	11.3749	11.3749	17.0624	0.03065	4	4
3	5	1.0304	15.528	0.0843847	16.4984	13.587	9.70497	0.00465	17	14
3	5	1.3852	16.6041	0.0943907	14.4383	14.4383	16.6041	0.0098	20	20
3	5	0.45515	15.3795	0.15819	21.9708	13.1825	17.5766	0.03185	10	6
3	5	0.61685	17.8325	0.132609	17.8325	16.2114	12.9691	0.1043	11	10
3	5	0.13185	22.7531	0.143345	15.1688	22.7531	7.58438	0.10845	2	3
3	5	0.4306	18.5787	0.176962	9.28936	11.6117	11.6117	0.0263	4	5
3	5	0.1867	21.4247	0.15399	16.0686	10.7124	21.4247	0.03945	3	2
3	5	0.92515	12.9709	0.0806356	16.2136	18.3754	16.2136	0.0389	15	17
3	5	0.5601	16.0686	0.0894483	16.0686	14.2832	14.2832	0.03415	9	8
3	5	0.2999	20.0067	0.0830277	13.3378	13.3378	13.3378	0.0149	4	4
3	5	0.1196	25.0836	0.00376254	8.3612	25.0836	16.7224	0.08305	1	3
3	5	0.19035	21.0139	0.0764381	10.507	21.0139	26.2674	0.01275	2	4
3	5	0.72045	16.6563	0.110764	16.6563	20.8203	16.6563	0.0418	12	15
3	5	1.12535	16.8836	0.115875	16.8836	15.995	16.8836	0.0533	19	18
3	5	0.59765	15.059	0.146741	15.059	10.0393	13.3858	0.07815	9	6
3	5	0.30685	26.0714	0.125306	13.0357	16.2946	6.51784	0.1889	4	5
3	5	0.20055	14.9589	0.0902518	14.9589	0	19.9452	0.07595	3	0
3	5	0.11195	26.7977	0.109424	8.93256	17.8651	17.8651	0.00975	1	2
3	5	0.5937	16.8435	0.121526	21.8966	13.4748	16.8435	0.0072	13	8
3	5	0.2205	18.1406	0.268934	22.6757	18.1406	9.07029	0.14655	5	4
3	5	0.30825	22.7088	0.0916464	12.9765	19.4647	12.9765	0.15085	4	6
3	5	0.68105	19.0882	0.138536	16.1515	22.0248	17.6199	0.01715	11	15
3	5	0.3039	23.0339	0.154163	19.7433	16.4528	9.87167	0.06665	6	5
3	5	0.11165	26.8697	0.0344828	8.95656	26.8697	17.9131	0.0412	1	3
3	5	0.18065	16.6067	0.00719624	11.0711	11.0711	27.6778	0.02595	2	2
3	5	0.4363	16.044	0.104286	18.336	18.336	18.336	0.01285	8	8
3	5	1.40455	14.2394	0.0869674	15.6634	15.6634	15.6634	0.0002	22	22
3	5	0.21865	22.8676	0.105877	13.7206	13.7206	9.14704	0.0404	3	3
3	5	0.7624	14.4281	0.0499082	11.8048	10.4932	17.0514	0.01355	9	8
3	5	0.30095	23.2597	0.0488453	6.64562	19.9369	9.96843	0.0735	2	6
3	5	0.82045	18.2826	0.0848924	14.6261	18.2826	12.1884	0.0568	12	15
3	5	0.2785	21.544	0.0491921	14.3627	7.18133	14.3627	0.037	4	2
3	5	0.6815	16.1409	0.295525	16.1409	13.2062	13.2062	0.1864	11	9
3	5	0.1215	24.6914	0.0868313	16.4609	24.6914	16.4609	0.00135	2	3
3	5	0.4248	18.8324	0.173964	14.1243	16.4783	18.8324	0.03815	6	7
3	5	0.3546	16.9205	0.210096	11.2803	16.9205	14.1004	0.00845	4	6
3	5	0.63395	17.3515	0.0997713	7.88706	12.6193	18.9289	0.14485	5	8
3	5	0.2629	19.0186	0.159186	15.2149	11.4112	22.8224	0.0152	4	3
3	5	0.5131	19.4894	0.0993958	13.6426	27.2851	15.5915	0.0124	7	14
3	5	0.15035	26.6046	0.0379115	19.9534	19.9534	19.9534	0.03795	3	3
3	5	0.24435	20.4625	0.254758	20.4625	20.4625	8.18498	0.13775	5	5
3	5	0.3436	20.3725	0.273865	11.6414	17.4622	17.4622	0.0304	4	6
3	5	0.22225	26.9966	0.146457	8.99888	13.4983	22.4972	0.0048	2	3
3	5	0.09875	30.3797	0.00405063	20.2532	10.1266	20.2532	0.02875	2	1
3	5	0.8075	17.3375	0.112074	11.1455	16.0991	12.3839	0.02225	9	13
3	5	0.4391	20.4965	0.0917786	9.10954	9.10954	2.27739	0.26485	4	4
3	5	0.34455	20.3164	0.0393267	11.6093	8.70701	11.6093	0.04035	4	3
3	5	0.45075	19.9667	0.0582363	11.0926	8.8741	4.43705	0.1308	5	4
3	5	0.1491	20.1207	0.00301811	20.1207	13.4138	13.4138	0.0697	3	2
3	5	0.2044	19.5695	0.0420744	9.78474	14.6771	14.6771	0.0724	2	3
3	5	0.61345	14.6711	0.0805282	11.4109	17.9314	17.9314	-0.0001	7	11
3	5	0.1973	20.2737	0.218702	10.1368	25.3421	15.2053	0.01145	2	5
3	5	0.29945	16.6973	0.0609451	6.67891	16.6973	23.3762	0.0808	2	5
3	5	0.2612	19.1424	0.26474	22.9709	7.65697	11.4855	0.09585	6	2
3	5	0.4981	14.0534	0.0822124	10.0381	20.0763	20.0763	0.00155	5	10
3	5	0.21395	18.696	0.0397289	14.022	9.34798	9.34798	0.0818	3	2
3	5	0.2624	19.0549	0.21189	11.4329	22.8659	15.2439	0.10425	3	6
3	5	0.29175	17.138	0.0796915	10.2828	20.5656	13.7104	0.0073	3	6
3	5	0.1408	21.3068	0.0791903	21.3068	21.3068	7.10227	0.1188	3	3
3	5	0.3825	18.3007	0.0854902	13.0719	10.4575	15.6863	0.03085	5	4
3	5	0.10935	27.4348	0.0763603	9.14495	36.5798	0	0.1124	1	4
3	5	0.1491	20.1207	0.0278337	0	26.8276	26.8276	0.0029	0	4
3	5	0.90645	13.2385	0.0612279	13.2385	16.5481	7.72243	0.01445	12	15
3	5	0.271	18.4502	0.0654982	11.0701	22.1402	18.4502	0.0739	3	6
3	5	0.27075	22.1607	0.120222	18.4672	18.4672	18.4672	0.0536	5	5
2	5	0.46325	23.7453	0.169347	0	30.2213	0	0.0054	0	14
2	5	0.95155	22.0693	0.221533	40.9858	22.0693	25.222	0.0516	39	21
2	5	1.2355	23.4723	0.274261	21.8535	24.2817	29.9474	0.0239	27	30
2	5	0.5035	23.8332	0.18719	33.7637	15.8888	39.7219	0.0092	17	8
2	5	1.06155	23.5505	0.224248	26.3765	27.3185	45.2169	0.001	28	29
2	5	0.75235	23.925	0.194059	46.5209	26.5834	42.5334	0.002	35	20
2	5	0.8192	23.1934	0.174988	30.5176	29.2969	45.166	0.012	25	24
2	5	0.633	23.6967	0.179068	48.9731	22.1169	33.1754	0.0005	31	14
2	5	1.5075	23.2172	0.209386	29.1874	27.1973	44.4444	0.02015	44	41
2	5	0.19145	26.1165	0.137895	57.4563	15.6699	20.8932	0.0768	11	3
2	5	0.1994	25.0752	0.139669	30.0903	30.0903	60.1805	0.0144	6	6
2	5	2.02875	23.6599	0.278028	37.4615	27.6032	39.4331	0.0165	76	56
2	5	0.2818	24.8403	0.285131	31.9375	14.1945	46.132	0.0115	9	4
2	5	0.5295	20.7743	0.198584	26.44	32.1058	43.4372	0.0231	14	17
2	5	0.58445	23.9541	0.253572	42.7753	30.7982	35.9312	0.04555	25	18
2	5	0.635	23.622	0.256142	33.0709	22.0472	39.3701	0.02545	21	14
2	5	0.71305	23.8412	0.178879	54.6946	28.0485	40.6704	0.00725	39	20
2	5	0.13515	29.5967	0.128746	36.9959	14.7984	44.3951	0.0112	5	2
2	5	0.22695	26.4375	0.0771095	44.0626	35.2501	52.8751	0.0212	10	8
2	5	0.54305	23.9389	0.158181	44.1948	31.3047	40.5119	0.02375	24	17
2	5	0.54135	24.014	0.166713	29.5557	20.3196	33.2502	0.079	16	11
2	5	0.3871	23.2498	0.166107	38.7497	12.9166	23.2498	0.05235	15	5
2	5	1.21805	22.9876	0.217971	27.0925	24.6295	32.8394	0.0174	33	30
2	5	0.52735	24.6516	0.169622	32.2367	28.4441	30.3404	0.0253	17	15
2	5	0.27905	25.0851	0.174879	35.8359	35.8359	32.2523	0.0311	10	10
2	5	0.3463	23.1014	0.216431	31.7644	14.4383	28.8767	0.03835	11	5
2	5	0.54485	23.8598	0.228779	27.5305	16.5183	25.6951	0.0382	15	9
2	5	0.4307	20.8962	0.155677	30.1834	34.827	25.5398	0.00385	13	15
2	5	0.5564	23.3645	0.178828	32.3508	23.3645	44.9317	0.00825	18	13
2	5	0.6948	23.0282	0.208621	44.6172	18.7104	43.1779	0.01435	31	13
2	5	0.50885	23.5826	0.19829	31.4435	31.4435	37.3391	0.04875	16	16
2	5	0.12145	24.7015	0.0395224	24.7015	41.1692	24.7015	0.0807	3	5
2	5	0.7559	25.1356	0.266702	18.521	25.1356	26.4585	0.03775	14	19
2	5	0.26805	29.8452	0.149226	33.5758	26.1145	22.3839	0.0103	9	7
2	5	1.3942	25.104	0.271338	25.104	19.3659	28.6903	0.00335	35	27
2	5	0.50505	25.74	0.1782	25.74	15.84	21.78	0.1241	13	8
2	5	0.79625	25.1177	0.189262	21.3501	23.8619	20.0942	0.01365	17	19
2	5	0.65735	21.2976	0.203621	30.4252	18.2551	22.8189	0.11225	20	12
2	5	0.2647	26.445	0.107858	41.5565	22.6672	22.6672	0.10125	11	6
2	5	0.68735	24.7327	0.200917	16.0035	7.27431	30.5521	0.00165	11	5
2	5	0.3657	27.3448	0.141509	35.5483	8.20345	27.3448	0.02745	13	3
2	5	0.48465	26.8235	0.219643	24.7601	10.3167	24.7601	0.1261	12	5
2	5	1.0927	24.7094	0.252174	21.0488	18.3033	21.0488	0.06545	23	20
2	5	0.38495	25.9774	0.14898	15.5864	12.9887	18.1842	0.13855	6	5
2	5	1.5629	24.3138	0.291029	15.9959	17.2756	24.3138	0.0024	25	27
2	5	0.42645	23.4494	0.154883	25.7943	16.4146	21.1045	0.0629	11	7
2	5	0.96195	23.9098	0.217215	29.1075	17.6724	30.1471	-0.00015	28	17
2	5	0.35595	25.2845	0.174744	33.7126	19.6657	19.6657	0.03315	12	7
2	5	0.7353	24.4798	0.197062	17.6799	9.51992	24.4798	0.03815	13	7
2	5	0.4249	28.2419	0.15486	25.8884	16.4745	16.4745	0.01315	11	7
2	5	0.3918	25.5232	0.208652	22.9709	22.9709	28.0755	0.15545	9	9
2	5	0.4471	24.603	0.165176	26.8396	4.47327	29.0763	0.00615	12	2
2	5	1.25475	26.3001	0.301454	15.9394	15.9394	31.8789	0.03825	20	20
2	5	0.4537	24.2451	0.246639	35.2656	15.4287	24.2451	0.0126	16	7
2	5	1.0921	24.723	0.32671	20.1447	18.3133	21.976	0.1172	22	20
2	5	0.2775	25.2252	0.172613	7.20721	7.20721	50.4505	0.0094	2	2
2	5	0.56245	24.8911	0.253089	26.669	26.669	30.2249	0.0155	15	15
2	5	0.98685	26.3465	0.296702	27.3598	19.2532	33.4397	0.02335	27	19
2	5	0.402	24.8756	0.224876	27.3632	19.9005	29.8507	0.06075	11	8
2	5	0.2335	29.9786	0.0837259	29.9786	21.4133	29.9786	0.0573	7	5
2	5	0.2939	23.8176	0.093229	23.8176	20.4151	20.4151	0.00075	7	6
2	5	0.63255	23.7135	0.220299	18.9708	33.199	34.7799	0.0778	12	21
2	5	1.4233	23.8881	0.228588	28.8063	13.3493	25.9959	0.00655	41	19
2	5	0.85005	25.8808	0.192459	17.646	19.9988	23.528	0.02625	15	17
2	5	0.4684	19.2143	0.149338	21.3493	17.0794	21.3493	0.03275	10	8
2	5	1.32125	24.2195	0.27894	20.4352	31.0312	35.5724	0.0196	27	41
2	5	0.49015	26.5225	0.206059	38.7636	22.4421	36.7235	0.02515	19	11
2	5	0.31085	25.7359	0.183207	22.5189	12.8679	48.2548	0.0679	7	4
2	5	0.63235	22.1396	0.158694	18.9768	25.3024	33.2095	0.04305	12	16
2	5	0.60135	24.9439	0.181425	34.9214	24.9439	31.5956	0.01975	21	15
2	5	0.3201	24.9922	0.180569	15.6201	12.4961	15.6201	0.14465	5	4
2	5	0.4452	24.708	0.202156	11.2309	17.9695	15.7233	0.1119	5	8
2	5	0.5908	23.6967	0.226473	22.0041	11.8483	15.2336	0.0593	13	7
2	5	0.3415	26.3543	0.166764	20.4978	8.78477	11.713	0.1135	7	3
2	5	1.3562	23.5953	0.327717	9.58561	9.58561	19.9086	0.02485	13	13
2	5	0.38545	18.1606	0.162408	15.5662	15.5662	15.5662	0.1309	6	6
2	5	0.191	31.4136	0.0942408	15.7068	5.2356	15.7068	0.07505	3	1
2	5	0.5065	23.692	0.17157	7.89733	3.94867	5.923	0.1385	4	2
2	5	1.46155	25.3156	0.290856	10.9473	10.9473	13.6841	0.0488	16	16
2	5	0.7633	23.5818	0.219835	13.101	9.17071	20.9616	0.07	10	7
2	5	0.1717	34.9447	0.0867793	11.6482	17.4723	5.82411	0.01975	2	3
2	5	1.244	24.9196	0.282235	16.881	10.4502	26.5273	0.01125	21	13
2	5	1.52955	26.1515	0.270831	24.1901	11.1144	24.1901	0.00155	37	17
2	5	1.3254	24.8981	0.220764	20.3712	10.5628	18.8622	0.05245	27	14
2	5	0.75635	23.7985	0.20989	19.8321	10.5771	18.5099	0.05035	15	8
2	5	0.5099	23.534	0.185134	17.6505	9.80584	21.5729	0.01895	9	5
2	5	0.3478	25.8769	0.225992	14.3761	11.5009	17.2513	0.0822	5	4
2	5	1.39755	24.3283	0.299775	15.0263	14.3108	16.4574	0.02825	21	20
2	5	0.42185	26.0756	0.191182	11.8526	7.11153	16.5936	0.0604	5	3
2	5	0.33015	27.2603	0.154778	24.2314	9.08678	21.2025	0.00115	8	3
2	5	0.6709	25.3391	0.204874	19.377	10.4337	20.8675	0.04705	13	7
2	5	1.37995	24.6386	0.311605	16.6673	10.1453	21.7399	0.00815	23	14
2	5	0.42285	28.3789	0.233771	14.1894	9.45962	21.2841	0.0185	6	4
2	5	0.23295	30.0494	0.0822065	12.8783	8.58553	25.7566	0.012	3	2
2	5	0.39325	25.4291	0.184107	10.1716	10.1716	12.7146	0.2182	4	4
2	5	0.0973	30.8325	0.004111	20.555	0	0	0.0966	2	0
2	5	0.10125	29.6296	0.0883951	9.87654	9.87654	9.87654	0.0086	1	1
2	5	0.1979	25.2653	0.0972713	10.1061	10.1061	20.2122	0.0491	2	2
2	5	0.1165	25.7511	0.109871	34.3348	0	17.1674	0.023	4	0
2	5	0.30565	19.6303	0.0703419	3.27172	22.902	6.54343	0.0651	1	7
2	5	0.2622	22.8833	0.1373	15.2555	15.2555	11.4416	0.0142	4	4
2	5	0.456	15.3509	0.0411184	32.8947	26.3158	24.1228	0.0322	15	12
2	5	0.2124	23.5405	0.0567326	32.9567	9.4162	28.2486	0.10815	7	2
2	5	0.1587	25.2048	0.153749	0	0	0	0.27215	0	0
2	5	0.11175	26.8456	0.0872483	0	0	0	0.3698	0	0
2	5	0.16595	24.1036	0.0415788	6.02591	12.0518	6.02591	0.085	1	2
2	5	0.26355	22.7661	0.150446	0	0	0	0.9386	0	0
2	5	0.16275	24.5776	0.0439324	6.14439	0	6.14439	0.08275	1	0
2	5	0.23765	16.8315	0.00378708	4.20787	8.41574	0	0.28635	1	2
2	5	0.15585	25.6657	0.0535772	6.41643	0	0	0.65745	1	0
2	5	0.26015	23.0636	0.0774553	3.84394	0	0	1.2408	1	0
2	5	0.2065	24.2131	0.0878935	0	0	0	0.259	0	0
2	5	0.10305	29.1121	0.0494905	0	0	0	0.20735	0	0
2	5	0.26055	23.0282	0.124544	0	0	7.67607	0.1848	0	0
2	5	0.16535	24.1911	0.102812	0	6.04778	6.04778	0.06435	0	1
2	5	0.15795	25.3245	0.0449509	12.6622	6.33112	0	0.2039	2	1
2	5	0.19765	25.2972	0.055148	0	5.05945	10.1189	0.0431	0	1
2	5	0.1563	19.1939	0.0447857	6.39795	6.39795	6.39795	0.1545	1	1
2	5	0.22115	22.6091	0.0764187	9.04364	0	4.52182	0.12405	2	0
2	5	0.8894	15.7409	0.0973128	5.62177	6.74612	7.87047	0.08525	5	6
2	5	0.1562	25.6082	0.0672215	19.2061	0	25.6082	0.1224	3	0
2	5	0.2224	22.482	0.0658723	0	4.4964	13.4892	0.00455	0	1
2	5	0.16585	24.1182	0.0711486	0	0	12.0591	0.0547	0	0
2	5	0.10195	29.4262	0.102011	9.80873	9.80873	39.2349	0.0059	1	1
2	5	0.209	23.9234	0.0684211	4.78469	4.78469	9.56938	0.026	1	1
2	5	0.2123	23.5516	0.0372115	14.1309	0	0	0.31495	3	0
2	5	0.1019	29.4406	0.00441609	0	0	29.4406	0.0058	0	0
2	5	0.25635	23.4055	0.0981081	7.80183	3.90092	7.80183	0.1795	2	1
2	5	0.1544	25.9067	0.0463083	12.9534	0	12.9534	0.1128	2	0
2	5	0.37615	21.2681	0.0816164	7.97554	18.6096	5.31703	0.04795	3	7
2	5	1.11765	17	0.0837471	7.15788	8.05261	8.05261	0.0722	8	9
2	5	0.8161	17.1548	0.0721725	11.0281	7.35204	7.35204	0.14825	9	6
2	5	0.20395	24.5158	0.11694	14.7095	0	9.80633	0.09435	3	0
2	5	0.152	26.3158	0.0746711	13.1579	13.1579	6.57895	0.12295	2	2
2	5	0.1578	25.3485	0.0567174	6.33714	12.6743	0	0.72085	1	2
2	5	0.3661	21.852	0.0592734	8.19448	5.46299	5.46299	0.0901	3	2
2	5	0.2214	18.0668	0.0115176	4.51671	18.0668	9.03342	0.0337	1	4
2	5	0.3299	21.2186	0.136102	9.09366	12.1249	9.09366	0.11425	3	4
2	5	0.22275	17.9574	0.0958474	4.48934	8.97868	4.48934	0.04135	1	2
2	5	0.36	16.6667	0.04	0	13.8889	11.1111	0.03535	0	5
2	5	0.3146	22.2505	0.0656389	6.35728	3.17864	9.53592	0.01505	2	1
2	5	0.3182	21.9987	0.0828096	15.7134	6.28536	6.28536	0.13685	5	2
2	5	0.1509	26.5076	0.0387674	6.62691	6.62691	0	0.165	1	1
2	5	0.18935	26.4061	0.114603	10.5625	0	0	0.19825	2	0
2	5	0.4046	19.7726	0.068957	2.47158	2.47158	7.41473	0.1102	1	1
2	5	0.16475	24.2792	0.0940819	6.0698	0	6.0698	0.06895	1	0
2	5	0.22255	22.4669	0.148281	8.98674	4.49337	0	0.41835	2	1
2	5	0.46755	17.1105	0.0934659	8.55523	4.27762	4.27762	0.1611	4	2
2	5	0.26735	22.4425	0.100991	0	7.48083	3.74042	0.0898	0	2
2	5	0.0941	31.881	0.0053135	21.254	10.627	0	0.2557	2	1
2	5	0.16555	24.1619	0.0881909	6.04047	6.04047	12.0809	0.09465	1	1
2	5	0.1525	26.2295	0.027541	19.6721	6.55738	0	0.44865	3	1
2	5	0.4602	17.3837	0.0607345	6.5189	2.17297	6.5189	0.15655	3	1
2	5	0.14915	26.8186	0.128059	0	0	6.70466	0.05805	0	0
2	5	0.2081	24.0269	0.0538203	0	4.80538	4.80538	0.05415	0	1
2	5	0.15145	26.4114	0.0630571	0	6.60284	0	0.20005	0	1
2	5	0.0903	33.2226	0.0669989	0	0	11.0742	0.0245	0	0
2	5	0.19855	25.1826	0.044825	10.073	5.03651	5.03651	0.15885	2	1
2	5	0.17295	23.1281	0.0503036	0	5.78202	5.78202	0.1183	0	1
2	5	0.30755	22.7605	0.122257	3.2515	6.50301	3.2515	0.00955	1	2
2	5	0.5514	16.3221	0.0774392	5.4407	3.62713	7.25426	0.4172	3	2
2	5	0.1448	27.6243	0.0963398	6.90608	6.90608	0	0.608	1	1
2	5	0.1523	26.264	0.0912672	0	0	13.132	0.09565	0	0
2	5	0.25835	23.2243	0.104316	3.87072	11.6122	3.87072	0.2087	1	3
2	5	0.1077	27.8552	0.0538533	9.28505	0	9.28505	0.0597	1	0
2	5	0.21515	23.2396	0.120846	13.9438	4.64792	18.5917	0.0198	3	1
2	5	0.3297	15.1653	0.0602062	3.03306	9.09918	3.03306	0.06835	1	3
2	5	0.2694	22.2717	0.0592056	3.71195	0	3.71195	0.0166	1	0
2	5	0.1385	21.6606	0.0032491	21.6606	0	14.4404	0.0147	3	0
2	5	0.1677	23.8521	0.0679785	5.96303	5.96303	5.96303	0.035	1	1
2	5	0.4501	17.7738	0.0675405	2.22173	2.22173	6.66519	0.2815	1	1
2	5	0.33795	20.7131	0.112295	0	8.87705	2.95902	0.2164	0	3
2	5	0.47795	14.6459	0.0394393	8.36908	8.36908	4.18454	0.0704	4	4
2	5	0.159	25.1572	0.0908805	0	6.28931	12.5786	0.1049	0	1
2	5	0.10175	29.484	0.200983	9.82801	0	0	0.3097	1	0
2	5	0.15555	25.7152	0.168113	0	0	0	0.29645	0	0
2	5	0.5661	19.4312	0.117824	5.29942	3.53294	1.76647	0.09755	3	2
2	5	0.22195	22.5276	0.203424	4.50552	0	4.50552	0.1756	1	0
2	5	0.09825	30.5344	0.0447837	0	0	0	0.14925	0	0
2	5	0.1614	24.7831	0.0712515	0	0	12.3916	0.0382	0	0
2	5	0.33605	17.8545	0.0843624	5.9515	2.97575	14.8787	0.1303	2	1
2	5	0.15535	25.7483	0.10074	0	0	6.43708	0.05915	0	0
2	5	0.1514	26.4201	0.0805812	6.60502	6.60502	13.21	0.05965	1	1
2	5	0.10075	29.7767	0.0704715	0	19.8511	29.7767	0.03	0	2
2	5	0.1565	25.5591	0.226198	0	0	0	0.5022	0	0
2	5	0.15675	25.5183	0.0663477	12.7592	6.37959	0	0.4096	2	1
2	5	0.29705	20.1986	0.048645	3.36644	3.36644	6.73287	0.0229	1	1
2	5	0.09715	30.8801	0.0180134	0	0	0	0.3499	0	0
2	5	0.46685	19.2781	0.187962	2.14202	0	0	0.86955	1	0
2	5	0.16085	24.8679	0.106621	12.4339	6.21697	0	0.2295	2	1
2	5	0.1098	27.3224	0.0733151	9.10747	9.10747	9.10747	0.10485	1	1
2	5	0.16335	24.4873	0.0853994	12.2436	18.3655	24.4873	0.0175	2	3
2	5	0.1555	25.7235	0.100965	32.1543	32.1543	38.5852	0.01575	5	5
2	5	0.13065	30.6162	0.00727134	15.3081	15.3081	0	0.1588	2	2
2	5	0.1605	24.9221	0.0937695	37.3832	12.4611	43.6137	0.0147	6	2
2	5	0.86255	16.2309	0.375456	25.5058	22.0277	20.8684	0.00855	22	19
2	5	0.1518	26.3505	0.136034	13.1752	19.7628	6.58762	0.02885	2	3
2	5	0.14015	28.5408	0.0984659	7.13521	14.2704	7.13521	0.02745	1	2
2	5	0.2002	24.975	0.134366	24.975	14.985	29.97	0.01115	5	3
2	5	0.1525	26.2295	0.0760656	26.2295	32.7869	32.7869	0.0035	4	5
2	5	0.0924	32.4675	0.0551948	10.8225	32.4675	10.8225	0.01425	1	3
2	5	0.1488	26.8817	0.108871	20.1613	13.4409	0	0.173	3	2
2	5	0.62555	17.5845	0.106067	12.7887	12.7887	17.5845	0.0538	8	8
2	5	0.21825	22.9095	0.0957617	18.3276	9.1638	22.9095	0.03825	4	2
2	5	0.1307	30.6044	0.010329	53.5578	22.9533	22.9533	0.0056	7	3
2	5	0.1599	25.0156	0.101939	18.7617	18.7617	18.7617	0.0049	3	3
2	5	0.1446	27.6625	0.0103734	13.8313	13.8313	20.7469	0.00245	2	2
2	5	0.16055	24.9144	0.0582373	31.1429	12.4572	31.1429	0.0148	5	2
2	5	0.1128	26.5957	0.0616135	26.5957	26.5957	17.7305	0.0298	3	3
2	5	0.1643	24.3457	0.0885575	24.3457	12.1729	30.4321	5e-05	4	2
2	5	0.41555	19.2516	0.163639	36.0967	26.4709	33.6903	0.00555	15	11
2	5	0.15165	26.3765	0.148698	19.7824	6.59413	13.1883	0.05385	3	1
2	5	0.16215	24.6685	0.0909652	0	43.1699	18.5014	0.11465	0	7
2	5	0.20885	23.9406	0.113	9.57625	4.78813	23.9406	0.0003	2	1
2	5	0.11015	27.2356	0.00408534	18.1571	9.07853	9.07853	0.1079	2	1
2	5	0.1049	28.5987	0.0815062	9.53289	0	19.0658	0.03225	1	0
2	5	0.2021	24.7402	0.0796635	9.89609	9.89609	9.89609	0.1134	2	2
2	5	0.0989	30.3337	0.0470172	0	10.1112	0	0.09895	0	1
2	5	0.11895	33.6276	0.0416141	8.40689	33.6276	0	0.16965	1	4
2	5	0.2983	20.114	0.111297	16.7616	26.8186	23.4663	0.0504	5	8
2	5	0.21775	18.3697	0.0661309	13.7773	9.18485	9.18485	0.1762	3	2
2	5	0.2522	19.8255	0.055908	23.7906	19.8255	27.7557	0.01345	6	5
2	5	0.4796	18.7656	0.0668265	4.17014	22.9358	10.4254	0.0003	2	11
2	5	0.10655	28.1558	0.129986	28.1558	0	28.1558	0.07685	3	0
2	5	0.1603	24.9532	0.0658141	31.1915	6.2383	24.9532	0.03105	5	1
2	5	0.09215	32.5556	0.0613131	43.4075	10.8519	0	0.2392	4	1
2	5	0.08725	34.384	0.00573066	22.9226	22.9226	0	0.13135	2	2
2	5	0.13435	29.773	0.100112	29.773	22.3297	7.44325	0.0448	4	3
2	5	0.16145	24.7755	0.108702	0	12.3877	30.9693	0.0079	0	2
2	5	0.2641	22.7187	0.0691026	3.78644	18.9322	18.9322	0.07335	1	5
2	5	0.0945	31.746	0.0645503	0	0	42.328	0.05	0	0
2	5	0.10855	27.637	0.103178	9.21234	9.21234	9.21234	0.1046	1	1
2	5	0.1362	29.3686	0.150881	29.3686	0	44.0529	0.03265	4	0
2	5	0.14575	27.4443	0.137221	6.86106	20.5832	27.4443	0.00035	1	3
2	5	0.3618	19.3477	0.0565229	27.6396	30.4035	22.1117	0.04245	10	11
2	5	0.10455	28.6944	0.0822573	9.5648	28.6944	0	0.1164	1	3
2	5	0.2664	18.7688	0.141141	26.2763	18.7688	11.2613	0.01405	7	5
2	5	0.10485	28.6123	0.0219361	19.0749	28.6123	28.6123	0.059	2	3
2	5	0.1519	26.3331	0.103028	32.9164	19.7498	6.58328	0.0187	5	3
2	5	0.1053	28.49	0.110636	18.9934	9.49668	9.49668	0.0472	2	1
2	5	0.1581	25.3004	0.127767	25.3004	37.9507	18.9753	0.0369	4	6
2	5	0.0981	30.581	0.0897044	30.581	20.3874	50.9684	5e-05	3	2
2	5	0.1063	28.222	0.0178739	9.40734	18.8147	0	0.1447	1	2
2	5	0.13635	22.0022	0.0707737	29.3363	7.33407	44.0044	0.02785	4	1
2	5	0.3431	17.4876	0.120519	20.4022	14.573	26.2314	0.06605	7	5
2	5	0.20435	24.4678	0.0636163	24.4678	29.3614	24.4678	0.0832	5	6
2	5	0.5625	17.7778	0.119467	16	30.2222	19.5556	0.06715	9	17
2	5	0.1492	20.1072	0.0489276	20.1072	0	6.70241	0.0197	3	0
2	5	0.33	15.1515	0.0431818	30.303	30.303	9.09091	0.01115	10	10
2	5	0.14285	28.0014	0.141057	21.0011	7.00035	35.0018	0.001	3	1
2	5	0.28005	10.7124	0.0346367	21.4247	21.4247	10.7124	0.01255	6	6
2	5	0.1316	30.3951	0.155015	30.3951	45.5927	0	0.18125	4	6
2	5	0.2835	24.6914	0.0862434	24.6914	14.1093	28.2187	0.0047	7	4
2	5	0.8701	13.7915	0.0698196	22.9859	12.6422	14.9408	0.11455	20	11
2	5	0.1641	18.2815	0.0987203	36.5631	36.5631	18.2815	0.127	6	6
2	5	0.15985	25.0235	0.0275258	6.25586	43.7911	37.5352	0.0085	1	7
2	5	0.24755	12.1188	0.0179762	28.2771	8.07918	16.1584	0.0486	7	2
2	5	0.3413	8.78992	0.0165544	20.5098	14.6499	14.6499	0.0395	7	5
2	5	0.10665	28.1294	0.00937647	18.7529	37.5059	0	0.15595	2	4
2	5	0.2816	14.2045	0.0422585	35.5114	10.6534	24.858	0.00275	10	3
2	5	0.4364	20.6233	0.125917	18.3318	9.1659	20.6233	0.05175	8	4
2	5	0.8322	19.2261	0.197068	15.6212	24.0327	34.8474	0.0013	13	20
2	5	0.10285	29.1687	0.12737	19.4458	9.7229	19.4458	0.08745	2	1
2	5	0.37405	13.3672	0.0228579	13.3672	32.0813	16.0406	0.06285	5	12
2	5	0.27315	14.644	0.0530844	25.6269	25.6269	36.6099	0.00505	7	7
2	5	0.65865	12.1461	0.0538981	18.2191	15.1826	16.7008	0.0387	12	10
2	5	0.3416	23.4192	0.109485	23.4192	14.637	32.2014	0.04205	8	5
2	5	0.24955	12.0216	0.0126227	4.00721	12.0216	24.0433	0.0479	1	3
2	5	0.24775	24.218	0.159233	24.218	16.1453	20.1816	0.0523	6	4
2	5	0.2905	24.0964	0.0788296	27.5387	17.2117	30.9811	0.03935	8	5
2	5	0.386	18.1347	0.104275	12.9534	18.1347	31.0881	0.02705	5	7
2	5	0.91815	17.4263	0.178783	29.407	17.4263	30.4961	0.04445	27	16
2	5	0.2181	22.9253	0.0605227	13.7552	18.3402	36.6804	0.02125	3	4
2	5	0.1614	30.9789	0.162949	18.5874	6.19579	18.5874	0.0041	3	1
2	5	0.1604	24.9377	0.105673	24.9377	24.9377	18.7032	0.01355	4	4
2	5	0.1026	38.9864	0.0628655	0	9.74659	29.2398	0.0498	0	1
2	5	0.13935	28.7047	0.193039	35.8809	0	7.17618	0.08945	5	0
2	5	0.2648	18.8822	0.0825151	18.8822	15.1057	18.8822	0.0789	5	4
2	5	0.2412	20.7297	0.0472637	16.5837	12.4378	12.4378	0.1707	4	3
2	5	0.1351	22.2058	0.0233161	51.8135	22.2058	7.40192	0.0815	7	3
1	5	0.14095	21.2841	0.0468251	7.09471	21.2841	0	0.05605	1	3
1	5	0.35155	17.0673	0.117906	8.53364	8.53364	8.53364	0.01665	3	3
1	5	0.27145	11.0518	0.0471542	14.7357	3.68392	11.0518	0.0664	4	1
1	5	0.2157	13.9082	0.0268892	9.27214	4.63607	23.1803	0.0236	2	1
1	5	0.28435	17.584	0.0696325	17.584	3.51679	7.03359	0.0248	5	1
1	5	0.51775	11.5886	0.166683	13.52	9.65717	19.3143	0.0331	7	5
1	5	0.33735	17.7857	0.199496	14.8214	14.8214	14.8214	0.03195	5	5
1	5	0.2155	18.5615	0.189791	4.64037	13.9211	37.123	0.0059	1	3
1	5	0.18335	21.8162	0.11399	10.9081	10.9081	27.2702	0.0208	2	2
1	5	0.44235	15.8246	0.208206	18.0852	13.5639	18.0852	0.0695	8	6
1	5	0.7082	19.7684	0.235315	19.7684	19.7684	21.1805	0.0961	14	14
1	5	0.4067	19.6705	0.0666339	14.7529	4.91763	24.5881	0.0186	6	2
1	5	0.17085	23.4124	0.107112	11.7062	5.85309	0	0.18075	2	1
1	5	0.1638	30.525	0.0692918	12.21	12.21	12.21	0.0523	2	2
1	5	0.3507	19.9601	0.115768	17.1086	11.4058	8.55432	0.0531	6	4
1	5	0.2001	19.99	0.108696	19.99	19.99	9.995	0.11415	4	4
1	5	0.1151	26.0643	0.0812337	8.6881	0	26.0643	0.0534	1	0
1	5	0.203	19.7044	0.116749	0	19.7044	4.92611	0.18165	0	4
1	5	0.3863	20.7093	0.105876	2.58866	5.17732	10.3546	0.26725	1	2
1	5	0.2306	21.6826	0.1585	4.33651	13.0095	17.3461	0.04145	1	3
1	5	0.12025	24.948	0.102703	0	8.31601	8.31601	0.0161	0	1
1	5	0.1484	26.9542	0.00606469	6.73854	13.4771	13.4771	0.01245	1	2
1	5	0.77385	12.9224	0.147509	27.137	10.3379	18.0914	0.00095	21	8
1	5	0.46475	17.2136	0.292953	25.8203	17.2136	15.0619	0.0152	12	8
1	5	0.3138	19.1205	0.193435	22.3072	12.747	3.18674	0.26995	7	4
1	5	0.6679	16.4695	0.199656	17.9668	7.48615	11.9778	0.03645	12	5
1	5	0.089	33.7079	0.00561798	11.236	0	11.236	0.04755	1	0
1	5	0.31085	19.3019	0.0825157	12.8679	6.43397	6.43397	0.18235	4	2
1	5	0.3277	18.3094	0.159597	18.3094	9.15471	6.10314	0.13915	6	3
1	5	0.77285	15.5269	0.32723	10.3513	12.9391	23.2904	0.1219	8	10
1	5	0.24	20.8333	0.104583	8.33333	12.5	12.5	0.0434	2	3
1	5	0.20265	19.7385	0.102393	24.6731	4.93462	14.8038	0.04585	5	1
1	5	0.1247	24.0577	0.00360866	8.01925	0	8.01925	0.00845	1	0
1	5	0.20815	24.0211	0.117463	9.60846	4.80423	19.2169	0.05985	2	1
1	5	0.28135	21.3258	0.195308	17.7715	14.2172	3.55429	0.0786	5	4
1	5	0.2935	20.4429	0.156559	13.6286	13.6286	34.0716	0.00695	4	4
1	5	0.5311	16.946	0.215496	26.3604	16.946	13.1802	0.0102	14	9
1	5	0.18675	16.0643	0.0358768	10.7095	10.7095	16.0643	0.00935	2	2
1	5	0.2092	23.9006	0.0317878	9.56023	14.3403	4.78011	0.1309	2	3
1	5	0.3407	17.6108	0.246698	14.6757	23.4811	17.6108	0.03795	5	8
1	5	0.3066	19.5695	0.176778	6.52316	6.52316	16.3079	0.1016	2	2
1	5	0.58435	17.113	0.197741	10.2678	0	6.84521	0.1096	6	0
1	5	0.2784	21.5517	0.115661	10.7759	7.18391	3.59195	0.1457	3	2
1	5	0.4093	19.5456	0.0731737	21.9888	7.32959	19.5456	0.009	9	3
1	5	0.1757	22.7661	0.101024	17.0746	0	5.69152	0.0296	3	0
1	5	0.2058	24.2954	0.0561224	9.71817	0	9.71817	0.14505	2	0
1	5	0.3116	19.2555	0.212452	12.837	6.41849	12.837	0.0578	4	2
1	5	0.3784	18.4989	0.176797	7.92812	0	13.2135	0.0692	3	0
1	5	0.3402	20.5761	0.203263	20.5761	2.93945	11.7578	0.01945	7	1
1	5	0.1688	23.6967	0.0106635	5.92417	11.8483	0	0.23295	1	2
1	5	0.26085	15.3345	0.0272187	23.0017	7.66724	26.8353	0.0323	6	2
1	5	0.29565	23.6766	0.0617284	16.9119	10.1471	10.1471	0.0204	5	3
1	5	0.3222	15.5183	0.203755	9.31099	9.31099	21.7256	0.0338	3	3
1	5	0.352	19.8864	0.232244	8.52273	5.68182	11.3636	0.1208	3	2
1	5	0.3607	19.4067	0.257832	11.0895	5.54477	11.0895	0.20105	4	2
1	5	0.43035	18.5895	0.233182	13.9421	6.97107	23.2369	0.0993	6	3
1	5	0.9361	13.8874	0.360165	16.0239	18.1605	14.9557	0.08715	15	17
1	5	0.2795	21.4669	0.0728086	17.8891	10.7335	17.8891	0.10885	5	3
1	5	0.32035	18.7295	0.246605	12.4863	3.12159	6.24317	0.15165	4	1
1	5	0.2639	18.9466	0.161804	7.57863	0	0	0.4504	2	0
1	5	0.16915	17.7357	0.00236477	0	17.7357	5.91191	0.1366	0	3
1	5	0.45295	15.4542	0.214704	4.4155	8.831	15.4542	0.03315	2	4
1	5	0.31645	18.9603	0.209828	12.6402	6.32011	15.8003	0.03455	4	2
1	5	0.4077	17.1695	0.24442	4.90557	4.90557	4.90557	0.2843	2	2
1	5	0.5344	14.9701	0.217627	5.61377	9.35629	16.8413	0.02425	3	5
1	5	0.261	19.1571	0.262069	3.83142	7.66284	15.3257	0.12735	1	2
1	5	0.61905	16.1538	0.170988	11.3076	12.923	12.923	0.00955	7	8
1	5	0.513	17.5439	0.226511	11.6959	1.94932	15.5945	0.05335	6	1
1	5	0.31075	19.3081	0.246983	3.21802	9.65406	16.0901	0.0646	1	3
1	5	0.45895	15.2522	0.224098	4.35777	6.53666	13.0733	0.0203	2	3
1	5	0.36025	16.6551	0.350451	13.8793	22.2068	13.8793	0.00705	5	8
1	5	0.4322	16.1962	0.288408	16.1962	18.5099	23.1374	0.03855	7	8
1	5	0.47685	16.7768	0.240851	20.971	12.5826	18.8739	0.04155	10	6
1	5	0.61755	16.193	0.251882	19.4316	8.09651	22.6702	0.0747	12	5
1	5	0.41005	19.5098	0.195586	17.0711	7.31618	17.0711	0.1275	7	3
1	5	0.88865	15.7542	0.263152	11.253	5.62651	19.1301	0.0252	10	5
1	5	0.1299	23.0947	0.102002	0	7.69823	7.69823	0.1158	0	1
1	5	0.27275	18.3318	0.224198	14.6654	21.9982	21.9982	0.01165	4	6
1	5	0.27045	18.4877	0.235164	25.8828	25.8828	25.8828	0.0601	7	7
1	5	0.22645	22.0799	0.103334	4.41599	8.83197	13.248	0.09385	1	2
1	5	0.42425	16.4997	0.202829	4.7142	18.8568	18.8568	0.02095	2	8
1	5	0.5431	18.4128	0.234855	16.5715	11.0477	14.7303	0.01045	9	6
1	5	0.3048	22.9659	0.162894	16.4042	3.28084	13.1234	0.0708	5	1
1	5	0.35965	19.4634	0.142222	16.6829	16.6829	16.6829	0.0128	6	6
1	5	0.2278	21.9491	0.122695	8.77963	13.1694	26.3389	0.00935	2	3
1	5	0.3699	18.924	0.146661	24.3309	16.2206	13.5172	0.1198	9	6
1	5	0.44855	17.8352	0.256047	17.8352	13.3764	20.0647	0.0302	8	6
1	5	0.589	16.9779	0.283192	11.8846	22.0713	11.8846	0.07245	7	13
1	5	0.1915	20.8877	0.112533	10.4439	15.6658	5.22193	0.16195	2	3
1	5	0.4764	14.6935	0.14872	12.5945	10.4954	16.7926	0.01425	6	5
1	5	0.5008	17.9712	0.174521	15.9744	7.98722	19.9681	0.0594	8	4
1	5	0.4739	16.8812	0.226736	14.771	18.9913	12.6609	0.0836	7	9
1	5	0.3136	19.1327	0.200893	12.7551	12.7551	28.699	0.0013	4	4
1	5	0.34915	20.0487	0.190319	11.4564	20.0487	14.3205	0.1406	4	7
1	5	0.8526	16.4204	0.259676	10.5559	11.7288	15.2475	0.09455	9	10
1	5	0.3478	14.3761	0.0828062	11.5009	14.3761	11.5009	0.0565	4	5
1	5	0.17645	22.6693	0.0782091	11.3347	5.66733	5.66733	0.1238	2	1
1	5	0.23485	21.2902	0.0938897	4.25804	8.51607	17.0321	0.0012	1	2
1	5	1.13425	14.9879	0.309632	13.2246	12.343	13.2246	0.08455	15	14
1	5	0.15615	25.6164	0.0365034	19.2123	12.8082	12.8082	0.05455	3	2
1	5	0.2709	18.457	0.0372831	11.0742	14.7656	7.3828	0.0903	3	4
1	5	0.26065	19.1828	0.145789	19.1828	19.1828	15.3462	0.0112	5	5
1	5	0.1509	26.5076	0.0967528	6.62691	26.5076	0	0.17865	1	4
1	5	0.2365	21.1416	0.0704017	21.1416	8.45666	16.9133	0.0059	5	2
1	5	0.1608	24.8756	0.0942164	6.21891	0	6.21891	0.0656	1	0
1	5	0.34045	14.6864	0.094287	11.7492	8.81187	14.6864	0.0404	4	3
1	5	0.2651	18.8608	0.148812	11.3165	15.0886	22.633	0.019	3	4
1	5	0.28215	17.7211	0.209817	3.54421	17.7211	21.2653	0.0325	1	5
1	5	0.39125	15.3355	0.203962	10.2236	15.3355	15.3355	0.0576	4	6
1	5	0.6423	15.569	0.278219	18.6829	9.34143	17.126	0.0673	12	6
1	5	1.1423	17.5085	0.33774	14.8823	18.384	18.384	0.1178	17	21
1	5	0.812	16.0099	0.266933	13.5468	14.7783	13.5468	0.04345	11	12
1	5	0.16115	24.8216	0.081601	18.6162	0	6.2054	0.1569	3	0
1	5	0.25945	19.2715	0.115629	11.5629	3.85431	23.1258	0.02165	3	1
1	5	0.21675	23.0681	0.0927336	9.22722	23.0681	4.61361	0.12725	2	5
1	5	0.3892	17.9856	0.267343	10.2775	17.9856	10.2775	0.11835	4	7
1	5	0.7418	17.5249	0.236452	17.5249	13.4807	16.1769	0.00735	13	10
1	5	0.48285	16.5683	0.285803	12.4262	16.5683	24.8524	0.03055	6	8
1	5	0.4906	18.3449	0.153791	18.3449	18.3449	16.3066	0.02215	9	9
1	5	0.3435	20.3785	0.0221252	11.6448	8.73362	20.3785	0.0894	4	3
1	5	1.27585	17.2434	0.301407	14.1082	12.5407	15.6758	0.0188	18	16
1	5	0.1724	23.2019	0.0562645	11.6009	0	29.0023	0.00275	2	0
1	5	0.28745	17.3943	0.127326	17.3943	24.3521	20.8732	0.0032	5	7
1	5	0.26375	22.7488	0.2	26.5403	3.79147	11.3744	0.1328	7	1
1	5	0.42675	18.7463	0.195196	21.0896	11.7165	9.37317	0.0477	9	5
1	5	0.57155	17.4963	0.265769	10.4978	8.74814	13.997	0.1344	6	5
1	5	0.25765	23.2874	0.183776	19.4062	15.5249	19.4062	0.0305	5	4
1	5	0.56115	16.0385	0.271585	5.34616	12.4744	10.6923	0.1913	3	7
1	5	0.7331	16.3688	0.298186	12.2766	4.09221	10.9126	0.1597	9	3
1	5	1.6393	17.6905	0.255292	7.3202	18.3005	16.4704	0.11905	12	30
1	5	0.43845	18.2461	0.21633	22.8076	6.84229	25.0884	0.00145	10	3
1	5	0.511	17.6125	0.200978	15.6556	19.5695	9.78474	0.03975	8	10
1	5	0.3016	19.8939	0.190153	9.94695	13.2626	19.8939	0.0311	3	4
1	5	0.28685	17.4307	0.180582	10.4584	20.9169	6.97229	0.1875	3	6
1	5	0.83795	15.5141	0.242079	19.0942	13.1273	15.5141	0.0036	16	11
1	5	0.46525	23.6432	0.125631	8.59753	12.8963	17.1951	0.04385	4	6
1	5	0.25985	23.0902	0.19569	7.69675	11.5451	23.0902	0.01425	2	3
1	5	0.65145	16.8854	0.263029	18.4204	7.67519	15.3504	0.06065	12	5
1	5	0.3922	17.848	0.212647	10.1989	12.7486	7.64916	0.2305	4	5
1	5	0.4231	21.2716	0.250295	11.8175	9.45403	16.5446	0.12465	5	4
1	5	0.3256	18.4275	0.21422	27.6413	9.21376	18.4275	0.03005	9	3
1	5	0.33755	17.7751	0.258776	14.8126	5.92505	5.92505	0.2339	5	2
1	5	0.64235	17.1246	0.279988	7.78392	12.4543	20.2382	0.05695	5	8
1	5	0.4807	18.7227	0.222176	20.803	20.803	24.9636	0.0191	10	10
1	5	0.79325	15.1276	0.291018	21.4308	13.867	25.2127	0.00875	17	11
1	5	0.75295	19.9216	0.324059	22.5779	11.953	9.29677	0.02095	17	9
1	5	0.35755	19.5777	0.169627	2.79681	13.9841	16.7809	0.02885	1	5
1	5	0.21165	23.6239	0.0992204	9.44956	0	9.44956	0.03895	2	0
1	5	0.33585	23.8202	0.115677	14.8876	8.93256	11.9101	0.06635	5	3
1	5	0.41405	19.3213	0.132955	31.3972	14.491	21.7365	0.00795	13	6
1	5	0.2811	21.3447	0.152259	14.2298	10.6724	32.0171	0.01655	4	3
1	5	0.3228	18.5874	0.298172	24.7831	12.3916	15.4895	0.0811	8	4
1	5	0.38155	18.3462	0.200498	18.3462	2.62089	18.3462	0.0488	7	1
1	5	0.146	20.5479	0.0469178	20.5479	6.84932	20.5479	0.0189	3	1
1	5	1.00925	15.8534	0.270993	15.8534	10.8992	14.8625	0.0182	16	11
1	5	0.32045	28.0855	0.172882	12.4824	12.4824	18.7237	0.0947	4	4
1	5	0.3068	19.5567	0.231747	16.2973	13.0378	29.3351	0.0221	5	4
1	5	1.24205	19.3229	0.280786	16.1024	8.85633	21.7383	0.0704	20	11
1	5	0.29975	20.0167	0.141284	13.3445	10.0083	13.3445	0.0812	4	3
1	5	0.358	19.5531	0.180866	11.1732	2.7933	13.9665	0.1031	4	1
1	5	0.0881	34.0522	0.00510783	11.3507	0	0	0.0934	1	0
1	5	0.662	18.1269	0.160498	16.6163	15.1057	13.5952	0.2499	11	10
1	5	0.28275	21.2202	0.114235	21.2202	10.6101	14.1468	0.02945	6	3
1	5	0.3163	22.1309	0.210243	22.1309	12.6462	25.2924	0.0042	7	4
1	5	1.29925	16.1632	0.294478	20.0115	12.3148	10.7754	0.00835	26	16
1	5	0.61675	14.5926	0.177544	11.3498	9.72842	11.3498	0.19765	7	6
1	5	0.49395	20.245	0.179877	18.2205	8.09799	16.196	0.0178	9	4
1	5	0.3703	18.9036	0.175803	8.10154	13.5026	18.9036	0.11685	3	5
1	5	0.2526	23.753	0.0940222	15.8353	7.91766	0	0.25555	4	2
1	5	0.4334	18.4587	0.190817	4.61467	11.5367	6.92201	0.03655	2	5
1	5	0.2595	19.2678	0.139499	19.2678	7.70713	7.70713	0.0506	5	2
1	5	0.29755	20.1647	0.0201647	16.8039	26.8862	33.6078	0.01435	5	8
1	5	0.2262	22.1043	0.147436	17.6835	13.2626	26.5252	0.0059	4	3
1	5	0.2676	18.6846	0.148356	3.73692	22.4215	11.2108	0.0767	1	6
1	5	0.28315	21.1902	0.146036	17.6585	10.5951	14.1268	0.0736	5	3
1	5	0.14115	28.3386	0.068367	7.08466	14.1693	7.08466	0.067	1	2
1	5	0.14675	34.0716	0.0456559	27.2572	6.81431	13.6286	0.01155	4	1
1	5	0.4053	14.8038	0.162596	14.8038	12.3365	14.8038	0.0222	6	5
1	5	0.9225	17.3442	0.302005	13.0081	14.0921	24.9322	0.00105	12	13
1	5	0.3776	21.1864	0.227622	7.94492	26.4831	10.5932	0.00915	3	10
1	5	1.4491	19.3223	0.287696	19.3223	14.4918	22.0827	0.03305	28	21
1	5	0.21335	23.4357	0.126318	4.68713	18.7485	0	0.257	1	4
1	5	0.29405	20.4047	0.159497	13.6031	6.80156	17.0039	0.03985	4	2
1	5	0.22755	21.9732	0.148978	17.5786	17.5786	17.5786	0.0275	4	4
1	5	0.1454	27.5103	0.00756534	13.7552	6.87758	6.87758	0.03635	2	1
1	5	0.29835	20.1106	0.137255	13.4071	10.0553	20.1106	0.03225	4	3
1	5	0.24505	20.404	0.160375	4.0808	8.1616	16.3232	0.00605	1	2
1	5	0.2557	19.5542	0.176574	11.7325	3.91083	11.7325	0.02085	3	1
1	5	0.31285	19.1785	0.200416	22.3749	25.5714	9.58926	0.10015	7	8
1	5	0.86205	16.2404	0.248593	18.5604	18.5604	15.0803	0.05655	16	16
1	5	1.27725	15.6586	0.264944	15.6586	12.5269	18.7904	0.09355	20	16
1	5	0.7576	18.4794	0.229739	10.5597	9.2397	23.7592	0.03575	8	7
1	5	0.3531	16.9924	0.222883	5.66412	11.3282	16.9924	0.10655	2	4
1	5	0.33365	17.9829	0.161846	8.99146	2.99715	5.99431	0.1047	3	1
1	5	0.2633	18.9897	0.171667	15.1918	7.5959	22.7877	0.04935	4	2
1	5	0.40485	19.7604	0.147586	22.2305	7.41015	9.8802	0.1521	9	3
1	5	0.63425	18.92	0.195507	18.92	12.6133	15.7667	0.0794	12	8
1	5	0.3784	21.1416	0.172701	5.28541	10.5708	21.1416	0.07865	2	4
1	5	0.91905	17.4093	0.28524	10.8808	7.61656	14.145	0.0815	10	7
1	5	0.36155	22.127	0.225003	13.8293	8.29761	5.53174	0.16075	5	3
1	5	0.6658	18.0234	0.268099	15.0195	9.01172	22.5293	0.0221	10	6
1	5	0.91435	18.5924	0.303604	17.4988	12.0304	12.0304	0.0477	16	11
1	5	0.2543	23.5942	0.207236	23.5942	0	7.86473	0.0328	6	0
1	5	0.3035	19.7694	0.159308	6.58979	13.1796	9.88468	0.08395	2	4
1	5	0.2508	15.949	0.0689793	19.9362	11.9617	23.9234	0.0143	5	3
1	5	0.22835	21.8962	0.105759	8.75848	17.517	13.1377	0.09965	2	4
1	5	0.327	18.3486	0.169572	12.2324	6.11621	15.2905	0.08605	4	2
1	5	0.36495	19.1807	0.174818	19.1807	5.4802	19.1807	0.0605	7	2
1	5	1.0692	16.835	0.292321	14.0292	12.1586	21.5114	0.06265	15	13
1	5	0.3331	21.0147	0.116782	15.0105	3.0021	12.0084	0.165	5	1
1	5	0.31115	19.2833	0.198779	12.8555	16.0694	12.8555	0.0125	4	5
1	5	0.2504	19.9681	0.169928	27.9553	3.99361	19.9681	0.01005	7	1
1	5	0.176	22.7273	0.0926136	11.3636	22.7273	5.68182	0.171	2	4
1	5	0.2967	20.2224	0.090664	13.4816	10.1112	6.74082	0.0239	4	3
1	5	0.27355	21.9338	0.159203	10.9669	14.6226	3.65564	0.26765	3	4
1	5	1.1031	16.3177	0.229172	10.8784	7.25229	18.1307	0.00265	12	8
1	5	0.48295	18.6355	0.201884	20.7061	10.353	12.4236	0.05195	10	5
1	5	0.50815	17.7113	0.1779	7.87169	7.87169	11.8075	0.13025	4	4
1	5	0.38635	18.1183	0.244209	18.1183	7.76498	10.3533	0.04435	7	3
1	5	0.37645	23.9076	0.185018	15.9384	7.96919	13.282	0.1417	6	3
1	5	0.36395	19.2334	0.136145	8.24289	2.74763	27.4763	0.00575	3	1
1	5	0.58455	18.8179	0.204345	13.6857	6.84287	11.975	0.0533	8	4
1	5	0.69155	18.7984	0.202661	14.4603	13.0142	15.9063	0.0997	10	9
1	5	0.9661	19.6667	0.310786	14.4913	12.4211	12.4211	0.01695	14	12
1	5	0.2992	20.0535	0.140374	3.34225	3.34225	6.68449	0.17085	1	1
1	5	0.1504	26.5957	0.130319	13.2979	6.64894	6.64894	0.1313	2	1
1	5	0.15105	26.4813	0.0906984	6.62032	19.861	19.861	0.00085	1	3
1	5	0.2572	19.4401	0.241058	3.88802	3.88802	15.5521	0.01525	1	1
1	5	0.24835	20.1329	0.194484	24.1595	12.0797	16.1063	0.0901	6	3
1	5	0.29015	24.1255	0.099776	3.44649	10.3395	10.3395	0.0355	1	3
1	5	0.3569	19.6133	0.168535	11.2076	14.0095	16.8114	0.0881	4	5
1	5	0.4868	18.4881	0.180772	16.4339	12.3254	12.3254	0.053	8	6
1	5	0.2978	20.1478	0.264439	10.0739	6.71592	20.1478	0.07455	3	2
1	5	0.1599	18.7617	0.10444	12.5078	0	0	0.23765	2	0
1	5	0.39165	15.3198	0.203498	12.7665	5.1066	10.2132	0.0912	5	2
1	5	0.3047	19.6915	0.238759	13.1277	6.56383	19.6915	0.0162	4	2
1	5	0.4124	19.3986	0.184287	9.69932	7.27449	7.27449	0.2268	4	3
1	5	0.94315	15.9042	0.310555	6.36166	8.48221	18.0247	0.0914	6	8
1	5	0.62745	15.9375	0.227986	4.78126	7.96876	11.1563	0.038	3	5
1	5	0.3657	19.1414	0.242685	13.6724	2.73448	16.4069	0.0427	5	1
1	5	0.3001	19.9933	0.268411	6.66445	16.6611	16.6611	0.0922	2	5
1	5	0.3128	19.1816	0.207641	19.1816	6.39386	12.7877	0.04025	6	2
1	5	0.46945	17.0412	0.235382	17.0412	8.52061	10.6508	0.14425	8	4
1	5	0.31115	22.4972	0.0907922	6.42777	0	12.8555	0.04255	2	0
1	5	0.2094	23.8777	0.0861987	0	0	0	0.2361	0	0
1	5	0.09605	31.2337	0.00884956	10.4112	0	0	0.3862	1	0
1	5	0.44105	22.6732	0.130031	6.80195	0	4.53463	0.24175	3	0
1	5	0.4923	20.3128	0.157424	16.2503	4.06256	6.09385	0.08285	8	2
1	5	0.343	20.4082	0.235131	14.5773	8.74636	11.6618	0.0106	5	3
1	5	0.34355	20.3755	0.181778	11.6431	0	17.4647	0.0971	4	0
1	5	0.44685	17.9031	0.240237	4.47577	6.71366	17.9031	0.0504	2	3
1	5	0.2095	19.0931	0.197136	0	0	0	NaN	0	0

## Sheet: Tinaja
Fish ID	Age (dpf)	Swim Duration (s)	Swim Frequency (Hz)	Swim Duty Cycle	Aff Spike Rate-pre	Aff Spike Rate-swim	Aff Spike Rate-post	Refractory Period (s)	Spike Number-pre	Spike Number-swim
2	7	0.1594	25.0941	0.122334	18.8206	0	0	0.02	3	0
2	7	0.1567	25.5265	0.115507	19.1449	25.5265	0	0.16215	3	4
2	7	0.2668	18.7406	0.106634	14.9925	14.9925	11.2444	0.19895	4	4
2	7	0.26815	26.1048	0.18609	11.1878	7.45851	3.72926	0.15165	3	2
2	7	0.1591	18.8561	0.10748	6.28536	12.5707	0	0.1627	1	2
2	7	0.22145	22.5785	0.15963	4.51569	9.03138	13.5471	0.0033	1	2
2	7	0.22435	22.2866	0.215511	17.8293	8.91464	8.91464	0.2006	4	2
2	7	0.2005	24.9377	0.149377	14.9626	0	24.9377	0.02135	3	0
2	7	0.29365	23.8379	0.189682	10.2162	13.6217	6.81083	0.1052	3	4
2	7	0.26435	22.6972	0.145262	15.1315	7.56573	11.3486	0.002	4	2
2	7	0.3251	21.5318	0.105506	3.07598	6.15195	3.07598	0.15035	1	2
2	7	0.353	19.83	0.126912	11.3314	16.9972	16.9972	0.0016	4	6
2	7	0.23295	34.3421	0.253488	8.58553	0	4.29277	0.19575	2	0
2	7	0.3168	18.9394	0.0874369	9.4697	6.31313	3.15657	0.06625	3	2
2	7	0.74895	18.6928	0.072368	5.34081	17.3576	8.01122	0.0927	4	13
2	7	0.33985	26.4823	0.176107	11.7699	0	11.7699	0.028	4	0
2	7	0.22215	22.5073	0.145172	9.00293	9.00293	13.5044	0.1164	2	2
2	7	0.15475	25.8481	0.129564	6.46204	0	6.46204	0.04515	1	0
2	7	0.41955	16.6845	0.0921225	19.068	11.9175	14.301	0.0985	8	5
2	7	0.37265	21.4679	0.135382	8.05045	16.1009	5.36697	0.12255	3	6
2	7	0.298	20.1342	0.119966	3.3557	6.71141	10.0671	0.0262	1	2
2	7	0.32605	24.5361	0.163319	9.20104	15.3351	30.6701	0.05255	3	5
2	7	0.3474	17.2712	0.115861	20.1497	0	11.5141	0.06055	7	0
2	7	0.2653	22.6159	0.165096	11.308	11.308	0	0.321	3	3
2	7	0.1643	18.2593	0.11199	12.1729	0	12.1729	0.07805	2	0
2	7	0.1176	25.5102	0.145833	25.5102	8.5034	17.0068	0.03385	3	1
2	7	0.2467	24.321	0.132144	8.10701	28.3745	0	0.45535	2	7
2	7	0.30215	19.8577	0.105742	0	9.92884	3.30961	0.01225	0	3
2	7	0.22805	21.925	0.139882	13.155	21.925	8.77001	0.15905	3	5
2	7	0.3245	21.5716	0.107088	30.8166	9.24499	12.3267	0.08755	10	3
2	7	0.3116	22.4647	0.162709	6.41849	3.20924	12.837	0.01525	2	1
2	7	0.3904	17.9303	0.0888832	10.2459	10.2459	15.3689	0.0578	4	4
2	7	0.20875	14.3713	0.0524551	23.9521	14.3713	9.58084	0.12105	5	3
2	7	0.24355	24.6356	0.128105	24.6356	12.3178	4.10593	0.047	6	3
2	7	0.37855	21.1333	0.125479	10.5666	13.2083	2.64166	0.27035	4	5
2	7	0.25705	23.3418	0.200156	11.6709	0	15.5612	0.0264	3	0
2	7	0.23955	25.047	0.181173	12.5235	0	4.17449	0.1154	3	0
2	7	0.67775	16.2302	0.0872003	11.8038	4.42641	8.85282	0.0923	8	3
2	7	0.40625	17.2308	0.0838154	2.46154	12.3077	7.38462	0.16915	1	5
2	7	0.32015	28.1118	0.130095	15.6177	6.24707	12.4941	0.093	5	2
2	7	0.30055	26.6179	0.127433	9.9817	9.9817	0	0.33395	3	3
2	7	0.4132	19.3611	0.1803	2.42014	12.1007	9.68054	0.0369	1	5
2	7	0.38075	28.8903	0.15128	7.87919	7.87919	15.7584	0.00355	3	3
2	7	0.5051	17.8183	0.0936448	7.91922	1.97981	15.8384	0.03825	4	1
2	7	0.10845	27.6625	0.107884	0	27.6625	9.22084	0.0084	0	3
2	7	0.3602	19.4336	0.15186	13.8812	8.32871	2.77624	0.0748	5	3
2	7	0.4215	16.6074	0.124555	7.11744	16.6074	11.8624	0.1641	3	7
2	7	0.22865	21.8675	0.176908	13.1205	0	0	0.24585	3	0
2	7	0.3147	19.0658	0.134096	9.53289	0	12.7105	0.00915	3	0
2	7	0.25515	15.6771	0.104056	11.7578	19.5963	7.83853	0.20875	3	5
2	7	0.17555	22.7855	0.0538308	17.0891	5.69638	11.3928	0.08995	3	1
2	7	0.1621	24.6761	0.189698	37.0142	12.3381	6.16903	0.0863	6	2
2	7	0.72185	16.624	0.107917	8.31198	9.69731	5.54132	0.29535	6	7
2	7	0.1083	27.7008	0.0738689	36.9344	0	18.4672	0.02835	4	0
2	7	0.2743	25.5195	0.139446	14.5826	10.9369	14.5826	0.1523	4	3
2	7	0.1031	29.098	0.0315228	19.3986	19.3986	0	0.1923	2	2
2	7	0.16635	24.0457	0.0817553	12.0228	6.01142	0	0.1702	2	1
2	7	0.29225	20.5304	0.120445	10.2652	10.2652	17.1086	0.01795	3	3
2	7	0.33435	20.9361	0.166592	11.9635	2.99088	20.9361	0.0059	4	1
2	7	0.2034	24.5821	0.0897247	14.7493	24.5821	14.7493	0.16085	3	5
2	7	0.2812	21.3371	0.137447	10.6686	10.6686	10.6686	0.10425	3	3
2	7	0.213	18.7793	0.0762911	23.4742	23.4742	9.38967	0.16845	5	5
2	7	0.25735	19.4288	0.11191	19.4288	7.77152	11.6573	0.0782	5	2
2	7	0.2294	21.796	0.106364	26.1552	21.796	13.0776	0.1555	6	5
2	7	0.21945	31.8979	0.213944	18.2274	18.2274	13.6705	0.08835	4	4
2	7	0.35835	13.9528	0.0735315	11.1623	16.7434	13.9528	0.126	4	6
2	7	0.2867	20.9278	0.0355773	13.9519	13.9519	17.4398	0.0341	4	4
2	7	1.1417	16.6418	0.0801874	19.2695	12.2624	13.1383	0.14835	22	14
2	7	0.19395	30.9358	0.169116	20.6239	5.15597	10.3119	0.076	4	1
2	7	0.1688	23.6967	0.0918246	29.6209	17.7725	11.8483	0.1249	5	3
2	7	0.1864	26.824	0.09603	10.7296	0	5.36481	0.12625	2	0
2	7	0.2292	21.815	0.111693	17.452	4.363	13.089	0.0698	4	1
2	7	0.15585	25.6657	0.0189285	19.2493	19.2493	0	0.23735	3	3
2	7	0.2095	23.8663	0.152983	4.77327	0	9.54654	0.0764	1	0
2	7	0.29715	20.1918	0.177688	6.73061	3.3653	6.73061	0.13895	2	1
2	7	0.3426	20.432	0.146527	2.91886	14.5943	20.432	0.0794	1	5
2	7	0.27335	29.2665	0.230291	14.6333	7.31663	7.31663	0.05935	4	2
2	7	0.0982	30.5499	0.0829939	0	10.1833	10.1833	0.0619	0	1
2	7	0.29885	20.077	0.137025	6.69232	13.3846	13.3846	0.0599	2	4
2	7	0.3483	22.9687	0.125036	22.9687	0	5.74218	0.06775	8	0
2	7	0.4343	18.4204	0.124108	11.5128	2.30256	4.60511	0.25625	5	1
2	7	0.34365	20.3696	0.115816	17.4596	0	8.72981	0.01315	6	0
2	7	0.1084	27.6753	0.095941	0	9.22509	18.4502	0.08605	0	1
2	7	0.19965	25.0438	0.0761332	5.00877	5.00877	0	0.3448	1	1
2	7	0.2155	23.2019	0.102784	13.9211	0	9.28074	0.0069	3	0
2	7	0.2732	18.3016	0.113287	18.3016	10.981	14.6413	0.02925	5	3
2	7	0.22015	22.7118	0.0735862	9.08471	9.08471	13.6271	0.10805	2	2
2	7	0.26465	15.1143	0.0434536	11.3357	7.55715	11.3357	0.0833	3	2
2	7	0.27255	25.6834	0.174647	14.6762	7.3381	3.66905	0.0591	4	2
2	7	0.09945	30.1659	0.02363	30.1659	0	10.0553	0.0892	3	0
2	7	0.11465	26.1666	0.153511	26.1666	0	26.1666	0.01815	3	0
2	7	0.2094	28.6533	0.113181	9.5511	4.77555	9.5511	0.0517	2	1
2	7	0.30445	22.9923	0.199869	13.1384	3.28461	0	0.36165	4	1
2	7	0.2617	22.927	0.167176	7.64234	15.2847	15.2847	0.09645	2	4
2	7	0.1303	23.0238	0.0360706	0	7.6746	0	0.457	0	1
2	7	0.21925	18.244	0.0643101	18.244	9.12201	9.12201	0.0063	4	2
2	7	0.1044	28.7356	0.147989	47.8927	0	28.7356	0.0221	5	0
2	7	0.4459	20.1839	0.13041	8.97062	13.4559	8.97062	0.02785	4	6
2	7	0.3857	25.9269	0.153487	18.1488	2.59269	12.9634	0.08995	7	1
2	7	0.3183	18.8501	0.125039	18.8501	6.28338	12.5668	0.0144	6	2
2	7	0.2609	22.9973	0.0912227	15.3315	3.83289	15.3315	0.01465	4	1
2	7	0.09785	30.6592	0.130301	10.2197	10.2197	0	0.12545	1	1
2	7	0.15865	25.2127	0.120076	12.6064	18.9095	6.30318	0.0999	2	3
2	7	0.35235	17.0285	0.153541	19.8666	11.3523	17.0285	0.07335	7	4
2	7	0.1761	34.0716	0.155877	0	11.3572	5.67859	0.0703	0	2
2	7	0.15075	26.534	0.0271973	19.9005	0	0	0.3665	3	0
2	7	0.1087	27.5989	0.0335787	18.3993	0	9.19963	0.03165	2	0
2	7	0.2966	20.2293	0.0773769	13.4862	13.4862	20.2293	0.0207	4	4
2	7	0.262	19.084	0.142557	11.4504	11.4504	7.63359	0.1703	3	3
2	7	0.33705	23.7354	0.0851506	5.93384	17.8015	11.8677	0.1732	2	6
2	7	0.199	25.1256	0.170101	5.02513	10.0503	10.0503	0.126	1	2
2	7	0.3142	22.2788	0.116805	25.4615	6.36537	9.54806	0.1073	8	2
2	7	0.14925	26.8007	0.284087	0	26.8007	0	0.15445	0	4
2	7	0.22385	13.4018	0.0625419	31.2709	13.4018	17.8691	0.17045	7	3
2	7	0.2369	21.106	0.146264	33.7695	21.106	16.8848	0.06725	8	5
2	7	0.37735	26.5006	0.177952	10.6002	29.1507	10.6002	0.12675	4	11
2	7	0.5198	15.3905	0.0805117	9.61908	25.0096	11.5429	0.0934	5	13
2	7	0.2511	23.8949	0.0569494	11.9474	3.98248	3.98248	0.0122	3	1
2	7	0.35305	19.8272	0.128027	19.8272	5.66492	11.3298	0.00515	7	2
2	7	0.25045	23.9569	0.118786	7.98563	11.9784	11.9784	0.06815	2	3
2	7	0.28235	24.7919	0.179564	7.08341	21.2502	10.6251	5e-05	2	6
2	7	0.1641	24.3754	0.150823	6.09385	0	0	0.17255	1	0
2	7	0.47685	18.8739	0.0886023	8.38838	10.4855	8.38838	0.25515	4	5
2	7	0.1036	28.9575	0.0646718	0	0	19.305	0.0007	0	0
2	7	0.1121	26.7618	0.0044603	17.8412	0	26.7618	0.02645	2	0

## Sheet: Surface_ablation
Fish ID	Age (dpf)	Swim Duration (s)	Swim Frequency (Hz)	Swim Duty Cycle	Aff Spike Rate-pre	Aff Spike Rate-swim	Aff Spike Rate-post	Refractory Period (s)	Spike Number-pre	Spike Number-swim
14	6	0.25575	15.6403	0.0461388	23.4604	27.3705	0	0.0021	6	7
14	6	0.27545	10.8913	0.0197858	14.5217	29.0434	43.5651	0.0197	4	8
14	6	0.2648	11.3293	0.0674094	3.77644	0	0	0.2982	1	0
14	6	0.21015	23.7925	0.0482988	9.51701	14.2755	14.2755	0.1476	2	3
14	6	0.2038	19.6271	0.103288	9.81354	14.7203	9.81354	0.0715	2	3
14	6	0.2647	15.1114	0.132792	15.1114	18.8893	3.77786	0.0112	4	5
14	6	0.20895	19.1433	0.0820771	19.1433	0	14.3575	0.014	4	0
14	6	0.32685	18.357	0.107389	18.357	3.05951	0	0.3276	6	1
14	6	0.1182	25.3807	0.126904	16.9205	0	25.3807	0.013	2	0
14	6	0.48165	16.6096	0.157479	18.6858	10.381	31.1429	0.03945	9	5
14	6	0.191	20.9424	0.0866492	20.9424	10.4712	10.4712	0.03215	4	2
14	6	0.2367	16.899	0.184622	12.6743	16.899	25.3485	0.03905	3	4
14	6	0.25055	19.9561	0.114548	15.9649	15.9649	11.9737	0.0451	4	4
14	6	0.2941	20.4012	0.143659	6.80041	6.80041	17.001	0.0128	2	2
14	6	0.2246	22.2618	0.220169	8.90472	8.90472	4.45236	0.1879	2	2
14	6	0.24525	24.4648	0.247095	8.15494	4.07747	12.2324	0.09525	2	1
14	6	0.18965	21.0915	0.177696	10.5457	21.0915	21.0915	0.0242	2	4
14	6	0.25865	19.3311	0.120433	11.5987	19.3311	0	0.28175	3	5
14	6	0.29135	17.1615	0.1977	6.8646	17.1615	20.5938	0.0842	2	5
14	6	0.26105	19.1534	0.153419	22.9841	11.4921	0	0.2859	6	3
14	6	0.41235	16.9759	0.197163	7.27537	4.85025	14.5507	0.1325	3	2
14	6	0.2788	21.5208	0.129304	14.3472	3.5868	28.6944	0.0009	4	1
14	6	0.28725	17.4064	0.174587	13.9252	3.48129	6.96258	0.2432	4	1
14	6	0.3279	18.2983	0.176883	30.4971	21.348	9.14913	0.1926	10	7
14	6	0.4496	17.7936	0.148688	22.242	20.0178	20.0178	0.0384	10	9
14	6	0.2426	16.488	0.158285	4.12201	12.366	24.7321	0.0342	1	3
14	6	0.3235	18.5471	0.176043	18.5471	9.27357	21.6383	0.0442	6	3
14	6	0.1566	25.5428	0.261494	19.1571	25.5428	0	0.15835	3	4
14	6	0.2052	19.4932	0.169103	14.6199	4.87329	0	0.29105	3	1
14	6	0.32935	18.2177	0.211325	3.03628	12.1451	33.3991	0.0426	1	4
14	6	0.1933	20.6932	0.220124	0	0	15.5199	0.0197	0	0
14	6	0.2526	19.7941	0.168448	0	7.91766	11.8765	0.0761	0	2
14	6	0.27465	18.205	0.178227	10.923	18.205	14.564	0.0414	3	5
14	6	0.2027	19.7336	0.227676	4.9334	4.9334	4.9334	0.1886	1	1
14	6	0.23925	16.7189	0.17325	4.17973	0	0	0.2461	1	0
14	6	0.1987	20.1309	0.194011	15.0981	10.0654	10.0654	0.06655	3	2
14	6	0.2704	18.4911	0.17659	7.39645	11.0947	7.39645	0.1101	2	3
14	6	0.22535	17.7502	0.233637	4.43754	4.43754	8.87508	0.05245	1	1
14	6	0.304	16.4474	0.141612	16.4474	13.1579	9.86842	0.1618	5	4
14	6	0.24165	20.6911	0.152493	16.5529	28.9675	45.5204	0.0149	4	7
14	6	0.277	21.6606	0.228159	25.2708	10.8303	14.4404	0.06145	7	3
14	6	0.2314	17.2861	0.212619	8.64304	8.64304	8.64304	0.13875	2	2
14	6	0.43165	18.5335	0.227383	23.1669	13.9002	4.63338	0.11765	10	6
14	6	0.4528	15.4594	0.20053	17.6678	19.8763	11.0424	0.164	8	9
14	6	0.2856	21.0084	0.0947129	10.5042	31.5126	31.5126	0.0372	3	9
14	6	0.2102	23.7869	0.00713606	19.0295	9.51475	9.51475	0.06155	4	2
14	6	0.1431	20.9644	0.134521	27.9525	6.98812	13.9762	0.06585	4	1
14	6	0.39895	22.5592	0.223336	7.51974	12.5329	20.0526	0.0436	3	5
14	6	0.36165	16.5906	0.169639	19.3557	16.5906	13.8255	0.0164	7	6
14	6	0.2183	22.9043	0.153688	9.1617	4.58085	9.1617	0.02625	2	1
14	6	0.28905	17.298	0.254973	13.8384	0	27.6769	0.0026	4	0
14	6	0.27035	18.4945	0.282042	14.7956	22.1935	7.39782	0.04995	4	6
14	6	0.3212	18.68	0.258873	31.1333	6.22665	15.5666	0.159	10	2
14	6	0.36275	16.5403	0.26561	22.0538	11.0269	35.8374	0.0194	8	4
14	6	0.2093	19.1113	0.180841	14.3335	19.1113	33.4448	0.0751	3	4
14	6	0.29935	20.0434	0.21079	10.0217	0	13.3623	0.07185	3	0
14	6	0.28225	17.7148	0.223384	21.2578	17.7148	38.9725	0.05465	6	5
14	6	0.27465	18.205	0.233934	7.282	0	14.564	0.0644	2	0
14	6	0.52425	15.2599	0.209347	7.62995	13.3524	15.2599	0.09365	4	7
14	6	0.3408	23.4742	0.243691	26.4085	26.4085	35.2113	0.04425	9	9
14	6	0.2603	23.0503	0.222436	53.7841	26.892	23.0503	0.03475	14	7
14	6	0.357	16.8067	0.322969	22.409	5.60224	28.0112	0.02845	8	2
14	6	0.2309	21.6544	0.231702	8.66176	17.3235	4.33088	0.2062	2	4
14	6	0.31655	15.7953	0.260306	12.6362	12.6362	6.31812	0.13205	4	4
14	6	0.22495	17.7817	0.252723	22.2272	4.44543	22.2272	0.0135	5	1
14	6	0.22525	17.758	0.275916	39.9556	4.43951	17.758	0.03805	9	1
14	6	0.2634	18.9825	0.218869	7.59301	7.59301	3.79651	0.09715	2	2
14	6	0.20295	19.7093	0.211382	4.92732	4.92732	19.7093	0.01855	1	1
14	6	0.474	14.7679	0.253376	16.8776	8.43882	8.43882	0.2222	8	4
14	6	0.2768	18.0636	0.246207	7.22543	0	18.0636	0.01505	2	0
14	6	0.52025	15.3772	0.24248	21.1437	3.84431	9.61076	0.13505	11	2
14	6	1.0554	15.1601	0.249147	17.0551	7.58006	13.2651	0.16175	18	8
14	6	0.1446	20.7469	0.0919779	13.8313	13.8313	0	0.2216	2	2
14	6	0.32765	21.3643	0.259423	9.15611	12.2081	6.10407	0.1999	3	4
14	6	0.5146	15.5461	0.285367	13.6028	9.71628	13.6028	0.143	7	5
14	6	0.4488	15.5971	0.292781	13.369	13.369	13.369	0.08995	6	6
14	6	0.41	17.0732	0.268171	7.31707	7.31707	26.8293	0.0128	3	3
14	6	0.27175	22.0791	0.256118	11.0396	0	18.3993	0.0367	3	0
14	6	0.3092	16.1708	0.305627	16.1708	0	3.23415	0.1238	5	0
14	6	0.4032	19.8413	0.268601	9.92063	2.48016	14.881	0.0013	4	1
14	6	0.3706	16.19	0.310982	2.69833	10.7933	21.5866	0.13975	1	4
14	6	0.1591	18.8561	0.184161	6.28536	6.28536	0	0.1953	1	1
14	6	0.3145	19.0779	0.239746	3.17965	19.0779	22.2576	0.0037	1	6
14	6	0.2463	20.3004	0.345108	12.1803	12.1803	12.1803	0.10675	3	3
14	6	0.20755	24.0906	0.279692	9.63623	0	14.4543	0.0796	2	0
14	6	0.3018	16.5673	0.289264	9.94036	0	13.2538	0.0133	3	0
14	6	0.21005	28.5646	0.243751	9.52154	23.8039	23.8039	0.0109	2	5
14	6	0.25275	23.7389	0.269238	0	7.91296	3.95648	0.00885	0	2
14	6	0.43745	20.5738	0.27226	9.1439	2.28598	11.4299	0.062	4	1
14	6	0.21905	18.2607	0.189911	0	4.56517	9.13034	0.07425	0	1
14	6	0.2409	16.6044	0.167289	4.1511	0	8.3022	0.0566	1	0
14	6	0.337	17.8042	0.311276	5.93472	2.96736	17.8042	0.07905	2	1
14	6	0.3951	17.717	0.297773	2.531	10.124	7.59301	0.00575	1	4
14	6	0.251	15.9363	0.258167	0	0	7.96813	0.05575	0	0
14	6	0.2661	15.0319	0.237505	0	3.75799	3.75799	0.17065	0	1
14	6	0.38665	18.1042	0.331049	5.17264	12.9316	5.17264	0.28765	2	5
14	6	0.29545	20.308	0.381114	6.76933	0	6.76933	0.1991	2	0
14	6	0.3321	21.078	0.278681	6.02228	3.01114	0	0.5774	2	1
14	6	0.32495	18.4644	0.246961	3.0774	0	6.15479	0.1326	1	0
14	6	0.1731	23.108	0.283073	28.885	11.554	0	0.45095	5	2
14	6	0.3053	22.9283	0.211759	6.55093	0	9.8264	0.02325	2	0
14	6	0.32305	18.573	0.268844	3.0955	15.4775	6.19099	0.14265	1	5
14	6	0.33	21.2121	0.34697	3.0303	0	18.1818	0.0512	1	0
14	6	0.6135	16.2999	0.291361	8.14996	16.2999	21.1899	0.07455	5	10
14	6	0.30635	19.5854	0.332136	9.79272	9.79272	6.52848	0.0197	3	3
14	6	0.21	19.0476	0.259286	4.7619	14.2857	4.7619	0.1863	1	3
14	6	0.19065	20.9809	0.189614	0	5.24521	0	0.312	0	1
14	6	0.44075	22.6886	0.259104	4.53772	15.882	9.07544	0.0388	2	7
14	6	0.4165	14.4058	0.236495	2.40096	0	2.40096	0.31115	1	0
14	6	0.231	17.316	0.214935	0	0	4.329	0.13415	0	0
14	6	0.23095	17.3198	0.235982	17.3198	8.65988	0	0.40555	4	2
14	6	0.27065	14.7792	0.310364	14.7792	0	3.69481	0.24745	4	0
14	6	0.38325	23.4834	0.276451	5.21853	2.60926	10.4371	0.0287	2	1
14	6	0.3147	15.8881	0.277884	3.17763	3.17763	9.53289	0.0617	1	1
14	6	0.2892	24.2047	0.33731	10.3734	3.45781	13.8313	0.0623	3	1
14	6	0.3912	17.8937	0.282592	10.2249	7.66871	2.55624	0.2781	4	3
14	6	0.2854	21.0231	0.216538	7.00771	3.50385	0	0.44365	2	1
14	6	0.29225	17.1086	0.301454	0	3.42173	3.42173	0.1781	0	1
14	6	0.35465	22.5575	0.299309	5.63936	2.81968	8.45904	0.05455	2	1
14	6	0.36775	21.7539	0.329572	8.15772	2.71924	5.43848	0.20715	3	1
14	6	0.2858	17.4948	0.253849	6.9979	3.49895	6.9979	0.1992	2	1
14	6	0.2059	19.4269	0.231909	4.85673	4.85673	0	0.28385	1	1
14	6	0.32225	15.5159	0.259891	6.20636	3.10318	3.10318	0.2117	2	1
14	6	0.31065	19.3143	0.281346	6.43811	0	6.43811	0.00435	2	0
14	6	0.21895	18.269	0.250971	0	4.56725	0	0.23205	0	1
14	6	0.2391	20.9118	0.261397	0	12.5471	8.3647	0.1525	0	3
14	6	0.17365	23.0348	0.292255	0	5.75871	17.2761	0.00725	0	1
14	6	0.29965	16.6861	0.189221	10.0117	13.3489	10.0117	0.00165	3	4
14	6	0.32705	18.3458	0.283749	3.05764	9.17291	9.17291	0.14005	1	3
14	6	0.22405	17.8532	0.207766	17.8532	22.3164	8.92658	0.01415	4	5
14	6	0.31105	22.5044	0.203826	6.42983	12.8597	3.21492	0.2185	2	4
14	6	0.34765	20.1352	0.16367	20.1352	14.3823	11.5058	0.04125	7	5
14	6	0.31165	19.2524	0.271137	12.8349	12.8349	19.2524	0.0754	4	4
14	6	0.0768	39.0625	0.00520833	39.0625	13.0208	13.0208	0.0487	3	1
14	6	0.37475	18.6791	0.156905	13.3422	8.00534	18.6791	0.02675	5	3
14	6	0.30615	16.3319	0.237792	6.53275	9.79912	16.3319	0.01945	2	3
14	6	0.20085	19.9154	0.202888	9.95768	19.9154	0	0.27625	2	4
14	6	0.15635	25.5836	0.102015	6.39591	12.7918	19.1877	0.0665	1	2
14	6	0.313	19.1693	0.219968	6.38978	15.9744	19.1693	0.0007	2	5
14	6	0.2392	20.903	0.243729	29.2642	8.3612	20.903	0.0181	7	2
14	6	0.146	34.2466	0.15274	0	6.84932	6.84932	0.13	0	1
14	6	0.3127	22.3857	0.168692	12.7918	3.19795	31.9795	0.00405	4	1
14	6	0.2759	25.3715	0.349221	21.747	0	7.249	0.04665	6	0
14	6	0.304	23.0263	0.219901	6.57895	6.57895	9.86842	0.12505	2	2
14	6	1.9259	12.4617	0.134379	0	30.1158	0	0.0286	0	58
14	6	0.6952	20.1381	0.206631	30.2071	38.8377	44.5915	0.07365	21	27
14	6	0.27265	18.3385	0.0548322	55.0156	40.3448	33.0094	0.0279	15	11
14	6	0.2383	20.982	0.124213	33.5711	25.1783	33.5711	0.0042	8	6
14	6	2.3933	11.6993	0.0681695	35.5158	29.2483	22.1452	0.05185	85	70
14	6	1.8717	12.2883	0.090506	31.5221	17.0968	26.1794	0.04345	59	32
14	6	0.6756	14.8017	0.0751184	29.6033	23.6827	26.643	0.0246	20	16
14	6	0.7848	11.4679	0.0821865	25.4842	25.4842	6.37105	0.07205	20	20
14	6	1.3743	16.7358	0.252383	24.0122	14.5529	23.2846	0.01235	33	20
14	6	0.91885	14.1481	0.0851608	26.1196	21.7663	20.678	0.06105	24	20
14	6	1.45905	11.6514	0.0579829	23.3028	19.1906	28.7859	0.0159	34	28
14	6	0.73895	10.8262	0.0427634	20.2991	28.4187	29.772	0.0237	15	21
14	6	1.31465	14.4525	0.104895	28.905	26.6231	9.88856	0.1085	38	35
14	6	0.82475	15.7624	0.116156	12.1249	8.48742	16.9748	0.04015	10	7
14	6	0.8764	13.6924	0.070801	10.2693	19.3975	21.6796	0.0891	9	17
14	6	0.286	20.979	0.121678	38.4615	10.4895	17.4825	0.0654	11	3
14	6	0.6202	12.8991	0.101338	16.1238	22.5734	17.7362	0.05765	10	14
14	6	0.28855	27.7248	0.149887	20.7936	17.328	31.1904	0.0407	6	5
14	6	0.4233	16.5367	0.0665013	18.8991	33.0735	14.1743	0.119	8	14
14	6	0.16075	24.8834	0.139969	12.4417	18.6625	24.8834	0.0389	2	3
14	6	0.48145	20.7706	0.0809014	22.8476	27.0018	18.6935	0.0712	11	13
14	6	2.4844	16.1005	0.194916	22.9432	22.5407	20.5281	0.0096	57	56
14	6	0.16555	18.1214	0.122924	30.2024	18.1214	0	0.24255	5	3
14	6	0.87435	13.7245	0.070967	22.8741	18.2993	24.0178	0.0645	20	16
14	6	0.15395	19.4868	0.0883404	32.4781	25.9825	19.4868	0.06255	5	4
14	6	0.0969	30.9598	0.0485036	20.6398	41.2797	10.3199	0.01655	2	4
14	6	0.3051	26.2209	0.152573	19.6657	29.4985	16.3881	0.00195	6	9
14	6	2.03955	17.1606	0.148219	20.5928	21.0831	26.4764	0.027	42	43
14	6	1.2552	11.1536	0.0635357	17.5271	29.4774	18.3238	0.0193	22	37
14	6	1.2885	20.1785	0.231044	21.7307	14.7458	25.6112	0.05165	28	19
14	6	2.2245	16.1834	0.118409	18.4311	22.477	23.376	0.18055	41	50
14	6	1.7946	17.8313	0.197509	19.503	26.1897	22.8463	0.07185	35	47
14	6	2.275	11.8681	0.0990769	24.6154	21.978	16.7033	0.0921	56	50
14	6	0.3326	15.0331	0.0557727	12.0265	18.0397	21.0463	0.0558	4	6
14	6	0.40005	17.4978	0.0626172	22.4972	4.99938	24.9969	0.004	9	2
14	6	0.10485	28.6123	0.0033381	19.0749	28.6123	19.0749	0.08005	2	3
14	6	0.47315	16.908	0.115502	21.1349	12.681	16.908	0.0611	10	6
14	6	0.66985	13.4358	0.100097	17.9145	22.3931	14.9287	0.002	12	15
14	6	0.9378	15.9949	0.119642	22.3928	10.6633	10.6633	0.0017	21	10
14	6	0.61385	14.6616	0.0694795	13.0325	17.9197	22.8069	0.0096	8	11
14	6	0.2345	12.7932	0.0381663	4.26439	29.8507	21.322	0.0276	1	7
14	6	0.4294	13.973	0.109921	23.2883	16.3018	18.6306	0.00225	10	7
14	6	0.4371	22.8781	0.104667	18.3024	11.439	20.5903	0.02035	8	5
14	6	0.23385	21.3812	0.111182	25.6575	25.6575	17.105	0.02395	6	6
14	6	0.5184	23.1481	0.101466	27.0062	27.0062	13.5031	0.0004	14	14
14	6	2.10695	13.2894	0.074278	22.3071	15.1878	19.4594	0.0145	47	32
14	6	0.7835	14.0396	0.048947	22.9738	20.4212	15.3159	0.0482	18	16
14	6	1.5392	11.0447	0.0586668	18.841	16.2422	30.5353	0.0872	29	25
14	6	1.6187	14.8267	0.161797	17.9156	29.6534	27.1823	0.0016	29	48
14	6	0.1626	18.4502	0.195264	55.3506	30.7503	36.9004	0.00145	9	5
14	6	0.23775	16.8244	0.0256572	21.0305	21.0305	8.4122	0.00045	5	5
14	6	0.90415	13.2721	0.0812918	22.1202	22.1202	16.5902	0.019	20	20
14	6	0.0539	55.6586	0.167904	18.5529	0	0	0.0599	1	0
14	6	1.2169	15.6134	0.0767524	17.257	32.8704	16.4352	0.03715	21	40
14	6	1.19015	12.6035	0.0674705	27.7276	17.6448	23.5264	0.0092	33	21
14	6	0.47475	18.9573	0.176514	14.7446	31.5956	21.0637	0.0042	7	15
14	6	0.19745	30.3874	0.129906	15.1937	15.1937	20.2583	0.0666	3	3
14	6	0.194	15.4639	0.0430412	30.9278	46.3918	10.3093	0.14995	6	9
14	6	1.88455	16.9802	0.142315	22.2865	20.6946	20.164	0.12215	42	39
14	6	1.1016	19.971	0.125681	17.2476	19.0632	22.6943	0.00405	19	21
14	6	0.80515	14.9041	0.0979321	19.8721	24.8401	29.8081	0.0261	16	20
14	6	0.74915	16.0182	0.0655409	24.0272	32.0363	5.33938	0.4418	18	24
14	6	2.1523	13.0093	0.0876737	22.7663	15.3324	20.9079	0.02865	49	33
14	6	3.0717	14.3243	0.102403	14.9754	24.4164	17.5798	0.01965	46	75
14	6	0.1751	17.1331	0.0739577	17.1331	11.422	17.1331	0.07295	3	2
14	6	0.9908	18.1671	0.138726	24.2229	10.0929	19.1764	0.1093	24	10
14	6	1.0855	20.2672	0.250714	15.661	17.5035	23.9521	0.0216	17	19
14	6	0.4803	12.4922	0.0928586	20.8203	29.1484	10.4102	0.04565	10	14
14	6	0.61975	19.3626	0.301089	14.522	12.9084	29.044	0.0225	9	8
14	6	0.371	18.8679	0.0738544	26.9542	29.6496	21.5633	0.0796	10	11
14	6	2.08715	18.2066	0.178186	19.644	22.5187	24.9144	0.00435	41	47
14	6	4.00045	15.7482	0.15632	21.4976	23.4974	21.9975	0.0439	86	94
14	6	0.7513	18.6344	0.273925	21.2964	13.3103	15.9723	0.0296	16	10
14	6	1.96235	13.759	0.1793	19.3645	20.8933	24.9701	0.0877	38	41
14	6	0.31475	25.417	0.111517	31.7712	19.0627	41.3026	0.04605	10	6
14	6	0.9665	14.4853	0.0988619	32.0745	17.5892	14.4853	0.06405	31	17
14	6	5.40875	15.1606	0.160878	21.077	14.0513	22.1863	0.13775	114	76
14	6	2.4555	15.4755	0.23091	13.8465	23.6204	22.8059	0.0026	34	58
14	6	4.7987	14.1705	0.119022	20.6306	22.5061	20.839	0.00985	99	108
14	6	0.4809	14.556	0.154294	22.8738	35.3504	14.556	0.0071	11	17
14	6	4.54295	14.528	0.131104	22.8926	22.0121	18.4902	0.1383	104	100
14	6	1.248	16.0256	0.133133	34.4551	15.2244	24.8397	0.04615	43	19
14	6	1.5621	12.1631	0.0834454	16.6443	23.0459	17.2844	0.02605	26	36
14	6	1.52835	15.0489	0.0914385	18.9747	16.3575	15.7032	0.0422	29	25
14	6	0.3066	13.0463	0.0208741	39.1389	13.0463	6.52316	0.02685	12	4
14	6	0.38185	18.3318	0.123871	10.4753	5.23766	10.4753	0.0628	4	2
14	6	1.3035	12.2746	0.0523207	12.2746	17.6448	24.5493	0.0162	16	23
14	6	2.9053	13.7679	0.100902	16.8657	22.3729	19.6193	0.0864	49	65
14	6	0.2316	12.9534	0.102547	25.9067	38.8601	25.9067	0.0588	6	9
14	6	4.53645	18.0758	0.170552	24.0276	18.9576	21.6028	0.0138	109	86
14	6	1.0299	12.6226	0.114574	17.4774	24.2742	21.3613	0.0182	18	25
14	6	1.17895	16.116	0.193308	27.1428	21.2053	11.875	0.0112	32	25
14	6	1.2923	13.1548	0.0689855	20.893	17.0239	17.0239	0.0011	27	22
14	6	2.1714	14.2765	0.104518	19.3424	18.8818	22.5661	0.00025	42	41
14	6	3.7485	17.607	0.177164	20.5415	21.3419	18.9409	0.0155	77	80
14	6	0.15145	19.8085	0.0270716	33.0142	13.2057	19.8085	0.0364	5	2
14	6	0.35525	19.7044	0.0933146	22.5194	19.7044	5.62984	0.11265	8	7
14	6	23.7617	17.423	0.161726	20.4951	19.4009	21.2947	0.0407	487	461
14	6	0.65385	10.7058	0.0727996	27.5292	35.1763	18.3528	0.06805	18	23
14	6	5.1281	16.9653	0.158226	21.4504	17.5504	20.4754	0.019	110	90
14	6	2.8894	17.3046	0.158701	18.3429	20.7656	17.3046	0.04525	53	60
14	6	1.1753	19.5695	0.130137	22.122	19.5695	13.6135	0.07825	26	23
14	6	0.51315	13.6412	0.0986066	19.4875	13.6412	13.6412	0.0891	10	7
14	6	6.29095	15.5779	0.14567	20.6646	21.9363	22.7311	0.00125	130	138
14	6	0.21215	23.5682	0.0567994	37.7092	18.8546	37.7092	0.0281	8	4
14	6	2.4188	16.5371	0.147366	21.0848	21.0848	23.9788	0.02295	51	51
14	6	10.6027	15.9393	0.14559	21.6926	20.2779	20.9381	0.085	230	215
14	6	2.8839	21.1519	0.16261	21.8454	16.2974	18.3779	0.08385	63	47
14	6	1.70595	19.3441	0.145696	15.2408	15.827	28.723	0.0225	26	27
14	6	6.23705	17.7969	0.135264	17.6365	24.3705	21.6448	0.17115	110	152
14	6	6.32975	15.4824	0.124176	23.6976	22.4337	23.6976	0.0361	150	142
14	6	4.4492	17.5312	0.17148	23.1502	22.7007	22.2512	0.0517	103	101
14	6	1.08365	18.4561	0.288331	27.6842	21.2246	20.3018	0.01415	30	23
14	6	0.35075	17.1062	0.0939416	34.2124	8.5531	11.4041	0.0777	12	3
14	6	8.5733	16.2131	0.147924	23.6782	21.3453	16.0965	0.071	203	183
14	6	0.48245	12.4365	0.100218	18.6548	16.582	20.7275	0.05415	9	8
14	6	4.3484	16.3278	0.118549	20.2373	16.3278	16.7878	0.181	88	71
14	6	0.1792	16.7411	0.0119978	5.58036	5.58036	16.7411	0.0142	1	1
14	6	0.1797	22.2593	0.0603784	22.2593	33.389	11.1297	0.1606	4	6
14	6	0.8795	15.9181	0.0859579	17.0551	14.7811	20.4662	0.0032	15	13
14	6	2.3079	10.8324	0.0680055	14.2987	20.3648	17.3318	0.12565	33	47
14	6	0.64025	15.6189	0.0736431	17.1808	15.6189	14.057	0.0166	11	10
14	6	0.273	18.315	0.101832	25.641	10.989	7.32601	0.14825	7	3
14	6	5.24225	15.4514	0.109457	16.4052	21.9371	21.3649	0.17205	86	115
14	6	0.20785	24.0558	0.0625451	19.2446	4.81116	24.0558	0.0167	4	1
14	6	0.4321	13.8857	0.0542698	23.1428	18.5142	16.2	0.1983	10	8
14	6	0.44715	17.8911	0.0455105	11.1819	29.073	15.6547	0.01885	5	13
14	6	0.4952	20.1939	0.0946082	24.2326	22.2132	42.4071	0.02965	12	11
14	6	4.5988	16.0912	0.16226	19.7878	23.0495	18.4831	0.19955	91	106
14	6	2.28365	13.5748	0.0886519	23.2085	19.7053	18.8295	0.0657	53	45
14	6	1.9074	15.7282	0.111251	18.8739	18.8739	21.4952	0.00835	36	36
14	6	9.75515	18.2468	0.156036	21.2196	21.6296	22.1422	0.1519	207	211
14	6	67.0826	19.4387	0.208505	20.8698	24.7754	19.4089	0.0219	1400	1662
14	6	94.7248	22.3278	0.307997	23.7425	18.2423	12.1299	0.002	2249	1728
14	6	5.87035	18.5679	0.149642	14.4795	11.5836	14.6499	0.0646	85	68
14	6	21.9899	19.2816	0.220975	15.0524	12.2329	12.5058	0.17885	331	269
14	6	6.90145	19.706	0.216389	12.0265	9.27341	9.7081	0.01285	83	64
14	6	10.2846	17.4047	0.241434	10.015	13.4181	16.3351	0.07025	103	138
14	6	1.54	19.4805	0.137143	31.1688	15.5844	13.6364	0.00625	48	24
14	6	4.49685	19.1245	0.182472	20.2364	17.3455	13.1203	0.02285	91	78
14	6	2.29335	16.5696	0.11178	22.2382	14.3894	10.465	0.04735	51	33
14	6	3.00725	16.294	0.153745	17.6241	8.9783	10.9735	5e-05	53	27
14	6	0.2471	28.3286	0.199919	16.1878	16.1878	4.04694	0.21365	4	4
14	6	3.91	19.6931	0.199591	9.46292	12.2762	10.4859	0.07745	37	48
14	6	4.0405	20.047	0.188566	11.1372	10.1473	10.6422	0.012	45	41
14	6	2.28645	19.2438	0.147806	6.99775	10.4966	9.18454	0.14355	16	24
14	6	5.27585	21.4183	0.240729	9.09806	10.9935	10.9935	0.0833	48	58
14	6	5.3811	19.3269	0.224173	10.4068	11.7076	9.10594	0.0946	56	63
14	6	6.095	16.735	0.196768	10.9926	9.35193	14.1099	0.03495	67	57
14	6	3.53085	15.2938	0.107467	10.4791	12.7448	15.2938	0.0818	37	45
14	6	9.6257	16.8299	0.142758	10.9083	15.0638	13.9211	0.0105	105	145
14	6	4.942	14.569	0.119496	12.1408	14.7713	12.9502	0.02565	60	73
14	6	3.2516	15.9921	0.192228	14.762	11.6866	12.6092	0.1695	48	38
14	6	1.6968	17.091	0.117692	8.25083	13.5549	11.1975	0.07505	14	23
14	6	4.03155	17.363	0.133658	11.658	11.658	12.6502	0.0392	47	47
14	6	2.59565	13.8694	0.116753	10.7873	12.7136	12.3283	0.08015	28	33
14	6	0.9116	17.5516	0.120338	12.0667	15.3576	12.0667	0.08505	11	14
14	6	0.58595	20.4796	0.173138	13.653	15.3597	6.82652	0.1741	8	9
14	6	1.07415	18.6194	0.145278	13.0336	9.30969	9.30969	0.16895	14	10
14	6	0.72105	19.4161	0.128771	11.0949	9.70806	15.2555	0.02945	8	7
14	6	2.94995	14.5765	0.154121	11.8646	7.79674	14.9155	0.02145	35	23
14	6	2.8721	13.9271	0.098656	6.96355	17.0607	11.838	0.03215	20	49
14	6	2.36755	13.0937	0.113134	16.0503	11.4042	11.8266	0.48305	38	27
14	6	0.3155	19.0174	0.148177	0	9.50872	22.187	0.11295	0	3
14	6	6.2446	15.8537	0.12538	14.2523	12.6509	9.6083	0.13635	89	79
14	6	1.5706	18.4643	0.138928	7.64039	8.27709	9.55049	0.104	12	13
14	6	3.181	16.6614	0.103489	8.17353	10.3741	10.0597	0.0178	26	33
14	6	0.4785	20.8986	0.454336	8.35946	10.4493	4.17973	0.129	4	5
14	6	2.3401	16.2386	0.233452	10.256	9.40131	8.97398	0.03225	24	22
14	6	1.8923	19.0245	0.241479	14.2684	5.28457	9.51223	0.0251	27	10
14	6	4.06185	19.6955	0.282396	9.84773	7.3858	9.60154	0.0191	40	30
14	6	3.45445	16.7899	0.155133	7.81601	9.26341	8.68445	0.0455	27	32
14	6	0.6274	17.5327	0.0737966	9.56328	6.37552	12.751	0.04495	6	4
14	6	1.61465	20.4379	0.154492	9.90927	8.67061	8.67061	0.30545	16	14
14	6	3.22535	17.0524	0.152805	7.7511	10.2314	10.2314	0.2068	25	33
14	6	0.83575	11.9653	0.114029	5.98265	10.7688	4.78612	0.058	5	9
14	6	1.973	18.2463	0.102053	9.12316	10.1368	6.08211	0.12495	18	20
14	6	5.0031	16.9895	0.154324	9.79393	8.79455	9.39418	0.06485	49	44
14	6	5.8032	17.5765	0.125534	8.78825	9.64985	11.373	0.27065	51	56
14	6	8.36825	16.0129	0.166917	9.91844	16.0129	22.3464	0.011	83	134
14	6	7.40305	15.9394	0.131412	16.7499	21.6127	19.3164	0.06705	124	160
14	6	0.95005	12.6309	0.0919952	26.3144	23.1567	30.5247	0.01275	25	22
14	6	12.0635	15.0039	0.14575	22.9618	16.1645	16.9105	0.07655	277	195
14	6	3.94095	12.4336	0.0952435	15.2248	15.4785	14.7173	0.14395	60	61
14	6	1.74385	17.2033	0.118789	12.0423	12.6158	17.7768	0.00735	21	22
14	6	1.5874	20.1588	0.121614	13.8591	18.2689	23.9385	0.07985	22	29
14	6	1.8434	14.6468	0.107953	17.9017	23.3265	19.5291	0.0142	33	43
14	6	4.7006	16.8064	0.138387	20.2102	20.6357	16.1681	0.05495	95	97
14	6	2.32115	18.9561	0.13125	22.4027	18.9561	12.9246	0.03015	52	44
14	6	0.61925	17.7634	0.112233	12.9189	14.5337	9.68914	0.06945	8	9
14	6	0.6466	20.1052	0.145453	18.5586	13.919	9.27931	0.1022	12	9
14	6	0.39985	15.0056	0.0671502	7.50281	25.0094	20.0075	0.04745	3	10
14	6	1.796	17.2606	0.124081	15.0334	15.0334	20.6013	0.0563	27	27
14	6	0.92115	17.3696	0.129132	19.5408	22.7976	20.6264	0.0002	18	21
14	6	2.93485	14.9922	0.0875854	18.7403	21.1254	20.1032	0.0755	55	62
14	6	1.30535	13.7894	0.103306	22.9823	17.6198	20.6841	0.05455	30	23
14	6	1.1578	18.1378	0.134177	17.2741	19.0016	20.729	0.018	20	22
14	6	9.5734	14.1016	0.133892	19.4288	18.9066	17.2353	0.1226	186	181
14	6	0.1835	32.6975	0.197548	5.44959	5.44959	5.44959	0.09905	1	1
14	6	1.55515	13.5035	0.0888339	12.2175	14.7896	17.3617	0.0198	19	23
14	6	0.88845	11.2556	0.0463729	20.26	15.7578	14.6322	0.01635	18	14
14	6	0.70055	17.1294	0.0879309	11.4196	15.7019	12.847	0.13435	8	11
14	6	0.19175	20.8605	0.136897	15.6454	15.6454	15.6454	0.05075	3	3
14	6	2.05895	16.5133	0.133709	13.5992	18.456	24.7699	0.0204	28	38
14	6	0.058	68.9655	0.134483	0	34.4828	0	0.0788	0	2
14	6	0.9241	18.3963	0.125041	23.8069	27.0533	23.8069	0.00135	22	25
14	6	0.8893	13.4938	0.111436	25.863	21.3651	21.3651	0.01715	23	19
14	6	0.1835	16.3488	0.0697548	21.7984	16.3488	27.248	0.01795	4	3
14	6	0.0828	36.2319	0.192029	24.1546	12.0773	24.1546	0.0178	2	1
14	6	1.70465	12.9059	0.0735635	21.1187	17.0123	17.0123	0.34465	36	29
14	6	2.2259	13.0284	0.088818	15.724	19.318	18.8688	0.01135	35	43
14	6	0.0889	33.7458	0.0776153	0	11.2486	11.2486	0.0521	0	1
14	6	0.84055	14.2764	0.0613289	14.2764	24.9836	16.6558	0.0701	12	21
14	6	0.69015	21.7344	0.0837499	18.8365	13.0406	26.0813	0.0977	13	9
14	6	4.2742	14.5056	0.0898765	20.8226	16.1434	27.3735	0.1695	89	69
14	6	3.2486	13.5443	0.0818199	13.8521	26.4729	25.8573	0.025	45	86
14	6	0.5459	14.6547	0.0667705	36.6367	36.6367	25.6457	0.113	20	20
14	6	0.74645	17.4158	0.0716726	34.8315	17.4158	25.4538	0.0598	26	13
14	6	0.87565	20.5562	0.159596	20.5562	20.5562	26.2662	0.01595	18	18
14	6	0.11945	25.1151	0.0636249	16.7434	33.4868	0	0.12085	2	4
14	6	0.32525	18.4473	0.0948501	30.7456	21.5219	12.2982	0.0101	10	7
14	6	1.0605	13.2013	0.0707685	23.5738	13.2013	22.6308	0.0771	25	14
14	6	1.19265	15.0924	0.0858173	21.8002	15.0924	25.1541	0.0185	26	18
14	6	0.29815	16.7701	0.0291799	23.4781	20.1241	30.1861	0.036	7	6
14	6	1.2718	17.2983	0.0876317	23.5886	37.7418	23.5886	0.12025	30	48
14	6	1.54215	14.9142	0.0647473	35.016	20.7503	17.508	0.00395	54	32
14	6	0.86425	13.8849	0.102574	16.199	16.199	19.6702	0.0483	14	14
14	6	0.80775	16.0941	0.100217	12.3801	23.5221	24.7601	0.00725	10	19
14	6	4.3076	15.3218	0.119208	20.8933	20.6612	26.2327	0.00165	90	89
14	6	0.418	14.3541	0.150718	28.7081	43.0622	28.7081	0.01625	12	18
14	6	1.6755	14.9209	0.118323	29.245	22.6798	23.2766	0.0249	49	38
14	6	0.57935	17.2607	0.100975	27.6172	22.4389	20.7129	0.00425	16	13
14	6	2.6644	12.7608	0.0779913	22.5191	30.0255	16.1387	0.0154	60	80
14	6	0.914	17.5055	0.117615	20.7877	14.2232	19.6937	0.08425	19	13
14	6	1.5315	15.018	0.136859	14.365	18.9357	23.5064	0.01295	22	29
14	6	0.5751	17.3883	0.0956355	20.8659	17.3883	27.8212	0.03675	12	10
14	6	3.1395	18.1558	0.154993	21.0225	26.7559	17.8372	0.03695	66	84
14	6	0.7197	15.2841	0.149507	16.6736	20.842	13.8947	0.0233	12	15
14	6	0.4213	16.6152	0.176715	16.6152	11.868	21.3624	0.0744	7	5
14	6	0.10145	29.5712	0.00689995	0	19.7141	49.2854	0.04795	0	2
14	6	0.6506	12.2963	0.0460344	16.9075	12.2963	12.2963	0.1716	11	8
14	6	1.95995	16.3269	0.123677	13.2656	19.3882	14.7963	0.2888	26	38
14	6	1.84075	13.5814	0.0880348	16.841	17.3842	13.5814	0.01735	31	32
14	6	0.87345	16.0284	0.10968	19.463	13.7386	8.0142	0.05575	17	12
14	6	0.2747	21.842	0.19585	14.5613	7.28067	3.64033	0.09325	4	2
14	6	0.531	15.0659	0.0876648	5.64972	5.64972	15.0659	0.05	3	3
14	6	2.2598	11.948	0.101204	10.1779	22.1259	12.833	0.02155	23	50
14	6	0.8222	14.595	0.0794211	27.9737	10.9462	8.51374	0.27945	23	9
14	6	1.44125	16.6522	0.112298	14.5707	11.1015	12.4892	0.1161	21	16
14	6	0.1677	17.8891	0.0220632	5.96303	23.8521	0	0.17015	1	4
14	6	0.8371	13.1406	0.0361367	10.7514	15.5298	14.3352	0.05995	9	13
14	6	2.2428	11.5927	0.091738	11.5927	13.3761	16.0514	0.01575	26	30
14	6	0.55555	18.0002	0.0880209	10.8001	9.00009	16.2002	0.12685	6	5
14	6	0.09645	31.1042	0.064282	20.7361	0	0	0.1245	2	0
14	6	0.23585	16.9599	0.123596	16.9599	25.4399	16.9599	0.00585	4	6
14	6	1.2299	15.4484	0.226766	19.5138	21.953	18.7007	0.01505	24	27
14	6	0.79745	11.286	0.0739231	28.8419	17.556	21.318	0.0133	23	14
14	6	0.7248	11.0375	0.0552566	16.5563	27.5938	26.2141	0.00755	12	20
14	6	0.5495	12.7389	0.0495905	36.3967	18.1984	36.3967	0.0359	20	10
14	6	0.0841	47.5624	0.25981	71.3436	23.7812	35.6718	0.05345	6	2
14	6	0.2226	35.9389	0.204852	31.4465	13.4771	17.9695	0.00955	7	3
14	6	1.51925	11.1897	0.0651308	25.0123	23.6959	28.3034	0.01915	38	36
14	6	0.3531	16.9924	0.0514019	28.3206	25.4885	22.6565	0.03475	10	9
14	6	0.6419	15.5788	0.0854494	24.926	35.8311	14.0209	0.04225	16	23
14	6	0.7982	12.5282	0.0570659	28.8148	3.75846	16.2866	0.05145	23	3
14	6	0.6433	17.0993	0.191901	7.77242	15.5448	10.8814	0.2667	5	10
14	6	0.36875	10.8475	0.0619661	10.8475	8.13559	35.2542	0.0253	4	3
14	6	0.2443	16.3733	0.0558739	28.6533	32.7466	16.3733	0.03825	7	8
14	6	0.6649	15.0399	0.0724169	27.0717	22.5598	12.0319	0.01515	18	15
14	6	1.42995	16.0845	0.152593	23.0777	15.3852	22.3784	0.0671	33	22
14	6	0.6272	11.1607	0.0287787	23.9158	20.727	19.1327	0.0264	15	13
14	6	1.0081	10.9116	0.0629898	24.7991	16.8634	25.7911	0.0709	25	17
14	6	0.4397	11.3714	0.0463953	27.2913	29.5656	31.8399	0.0236	12	13
14	6	0.2681	18.6498	0.114883	26.1097	37.2995	22.3797	0.00995	7	10
14	6	0.2027	24.667	0.076221	34.5338	24.667	4.9334	0.1193	7	5
14	6	0.076	39.4737	0.00526316	26.3158	13.1579	13.1579	0.00615	2	1
14	6	0.2996	20.0267	0.0906208	10.0134	26.7023	26.7023	0.0893	3	8
14	6	0.2576	11.646	0.0219332	31.0559	27.1739	54.3478	0.01645	8	7
14	6	0.47535	16.8297	0.0852004	46.2817	25.2446	46.2817	0.0122	22	12
14	6	0.5	16	0.0787	18	14	10	0.0838	9	7
14	6	0.79815	16.2877	0.0925265	12.529	20.0464	27.5637	0.1296	10	16
14	6	2.6084	13.0348	0.076292	18.4021	31.4369	17.252	0.0085	48	82
14	6	1.64025	12.8029	0.0675812	29.2638	20.1189	20.7285	0.04415	48	33
14	6	4.08775	11.4978	0.0861599	23.2402	27.8882	19.5707	0.09405	95	114
14	6	0.25	16	0.078	24	20	12	0.0957	6	5
14	6	0.35655	11.2186	0.0368812	16.8279	22.4372	22.4372	0.06415	6	8
14	6	0.1558	19.2555	0.0247112	6.41849	32.0924	19.2555	0.13425	1	5
14	6	0.46435	17.2284	0.0908797	21.5355	30.1497	30.1497	0.05605	10	14
14	6	0.44975	13.3407	0.0614786	22.2346	15.5642	13.3407	0.20115	10	7
14	6	0.2131	28.1558	0.0577194	9.38527	18.7705	14.0779	0.01515	2	4
14	6	1.00715	23.8296	0.31614	10.9219	16.8793	23.8296	0.09265	11	17
14	6	0.15955	37.6058	0.0842996	37.6058	43.8734	18.8029	0.02035	6	7
14	6	0.14615	20.5269	0.0420801	6.84229	0	34.2114	0.004	1	0
14	6	1.11825	13.4138	0.0863403	18.7793	31.2989	25.0391	0.0452	21	35
14	6	0.7348	12.2482	0.0605607	24.4965	29.9401	13.6091	0.0103	18	22
14	6	1.2913	10.0674	0.0527376	23.2324	15.4883	25.5556	0.025	30	20
14	6	0.23315	21.4454	0.103152	38.6018	34.3127	21.4454	0.08455	9	8
14	6	1.5697	11.4672	0.11894	21.6602	26.1196	22.2973	0.03185	34	41
14	6	0.35435	8.46621	0.0301961	11.2883	22.5765	42.331	0.005	4	8
14	6	1.4091	14.9031	0.166986	23.4192	21.9999	27.6772	0.1199	33	31
14	6	0.10505	28.5578	0.0575916	9.51928	47.5964	47.5964	0.0086	1	5
14	6	0.74455	12.0878	0.0533208	26.8619	21.4895	28.205	0.02255	20	16
14	6	0.1567	19.1449	0.0414805	38.2897	25.5265	19.1449	0.10735	6	4
14	6	0.35525	8.44476	0.00914849	22.5194	14.0746	19.7044	0.01675	8	5
14	6	0.2929	20.4848	0.0426767	23.8989	6.82827	17.0707	0.08325	7	2
14	6	0.1843	21.7037	0.0455779	27.1297	21.7037	5.42594	0.0849	5	4
14	6	0.65925	16.6856	0.110732	18.2025	27.3038	16.6856	0.07255	12	18
14	6	3.2761	12.8201	0.10073	18.0092	21.0616	31.1346	0.0205	59	69
14	6	1.31015	9.15926	0.0578941	27.4778	23.6614	35.1105	0.02	36	31
14	6	0.1299	23.0947	0.043495	7.69823	15.3965	38.4911	0.02785	1	2
14	6	0.0948	31.6456	0.0453586	42.1941	73.8397	63.2911	0.02235	4	7
14	6	0.5053	11.8741	0.0301801	43.5385	43.5385	23.7483	0.0392	22	22
14	6	1.69705	13.5529	0.126573	34.7662	15.3207	30.6414	0.02215	59	26
14	6	0.48025	12.4935	0.100156	18.7402	43.7272	39.5627	0.0198	9	21
14	6	0.2397	20.8594	0.147685	29.2032	20.8594	12.5156	0.137	7	5
14	6	0.11625	34.4086	0.132043	25.8065	34.4086	17.2043	0.02335	3	4
14	6	0.5913	18.6031	0.242263	16.9119	20.2943	37.2062	0.01365	10	12
14	6	0.2989	16.728	0.0419873	20.0736	30.1104	20.0736	0.0188	6	9
14	6	0.70255	14.2339	0.100776	21.3508	32.7379	34.1613	0.0055	15	23
14	6	2.13345	14.5305	0.128407	27.6547	20.6239	11.7181	0.1703	59	44
14	6	0.1718	23.2829	0.080326	11.6414	11.6414	11.6414	0.02205	2	2
14	6	0.54775	10.9539	0.0548608	9.12825	14.6052	14.6052	0.1137	5	8
14	6	0.38175	18.3366	0.0771447	13.0976	13.0976	31.4342	0.0645	5	5
14	6	0.32475	12.3172	0.0440339	30.7929	9.23788	21.555	0.08325	10	3
14	6	0.1585	31.5457	0.11041	18.9274	31.5457	18.9274	0.01105	3	5
14	6	0.33205	27.1044	0.115193	30.1159	21.0812	18.0696	0.03215	10	7
14	6	1.8497	11.8938	0.0757961	20.5439	16.7595	17.8407	0.0209	38	31
14	6	1.26365	13.4531	0.0949234	17.4099	12.6617	15.0358	0.03315	22	16
14	6	0.19945	20.0552	0.0358486	5.01379	15.0414	20.0552	0.0375	1	3
14	6	0.4131	21.7865	0.375333	19.3658	7.26216	12.1036	0.0314	8	3
14	6	0.60805	14.8014	0.0712112	9.86761	9.86761	9.86761	0.007	6	6
14	6	0.2068	14.5068	0.0157157	14.5068	9.67118	4.83559	0.0106	3	2
13	6	0.1818	27.5028	0.0816832	0	5.50055	0	0.04205	0	1
13	6	0.25155	11.9261	0.030809	0	15.9014	11.9261	0.1397	0	4
13	6	0.5351	11.2129	0.0373762	9.34405	3.73762	14.9505	0.0827	5	2
13	6	0.1468	27.248	0.0214578	13.624	6.81199	34.0599	0.0562	2	1
13	6	0.169	23.6686	0.0671598	11.8343	5.91716	23.6686	0.02085	2	1
13	6	0.1136	35.2113	0.131602	0	0	0	0.32955	0	0
13	6	0.38965	7.69922	0.0170666	2.56641	10.2656	2.56641	0.0839	1	4
13	6	0.2007	19.9302	0.103637	0	0	4.98256	0.1461	0	0
13	6	0.2036	14.7348	0.021611	9.82318	9.82318	19.6464	0.0578	2	2
13	6	0.0685	43.7956	0.0372263	0	29.1971	0	0.1405	0	2
13	6	0.0488	61.4754	0.0696721	40.9836	20.4918	0	0.0651	2	1
13	6	0.1753	22.818	0.1081	17.1135	5.70451	5.70451	0.13475	3	1
13	6	0.21855	22.8781	0.106841	9.15122	22.8781	13.7268	0.0825	2	5
13	6	0.1686	23.7248	0.14917	17.7936	5.9312	0	0.1718	3	1
13	6	0.30105	9.96512	0.0152799	6.64341	6.64341	16.6085	0.0132	2	2
13	6	0.16435	24.3383	0.0857925	0	6.08458	0	0.20755	0	1
13	6	0.1655	18.1269	0.0280967	18.1269	0	24.1692	0.0321	3	0
13	6	0.2338	12.8315	0.0175364	8.55432	0	8.55432	0.1467	2	0
13	6	0.2236	22.3614	0.143336	17.8891	13.4168	4.47227	0.0693	4	3
13	6	0.2308	21.6638	0.194757	8.66551	4.33276	17.331	0.0726	2	1
13	6	0.36585	10.9334	0.0207735	10.9334	19.1335	5.46672	0.13945	4	7
13	6	0.2734	18.2882	0.0715069	18.2882	10.9729	14.6306	0.10365	5	3
13	6	0.1697	17.6783	0.0209193	0	17.6783	23.571	0.01805	0	3
13	6	0.2388	25.1256	0.190117	29.3132	8.37521	16.7504	0.07765	7	2
13	6	0.27155	18.4128	0.100718	18.4128	11.0477	29.4605	0.0317	5	3
13	6	0.2201	22.7169	0.14607	9.08678	9.08678	0	0.25145	2	2
13	6	0.3589	8.35887	0.00515464	36.2218	11.1452	25.0766	0.0252	13	4
13	6	0.1758	17.0648	0.0352673	22.7531	11.3766	39.818	0.0073	4	2
13	6	0.1633	24.4948	0.103797	18.3711	18.3711	18.3711	0.021	3	3
13	6	0.22775	21.9539	0.0825467	13.1723	8.78156	21.9539	0.11015	3	2
13	6	0.1664	24.0385	0.0913462	18.0288	6.00962	6.00962	0.03235	3	1
13	6	0.3555	16.8776	0.121378	28.1294	11.2518	28.1294	0.0331	10	4
13	6	0.1803	27.7316	0.0604548	5.54631	11.0926	27.7316	0.06145	1	2
13	6	0.22245	22.477	0.0910317	17.9816	31.4677	17.9816	0.01525	4	7
13	6	0.2378	25.2313	0.140875	25.2313	21.0261	21.0261	0.15275	6	5
13	6	0.2877	24.3309	0.119743	17.3792	17.3792	31.2826	0.1204	5	5
13	6	0.23625	25.3968	0.158307	21.164	4.2328	21.164	0.0339	5	1
13	6	0.38765	12.8982	0.127435	18.0575	18.0575	20.6372	0.0987	7	7
13	6	0.35495	14.0865	0.062544	25.3557	8.45189	25.3557	0.0133	9	3
13	6	0.387	15.5039	0.166021	7.75194	10.3359	18.0879	0.0796	3	4
13	6	0.4849	10.3114	0.0378429	16.4982	20.6228	14.436	0.0043	8	10
13	6	0.04045	74.1656	0.0964153	0	0	0	0.24845	0	0
13	6	0.2011	24.8633	0.100199	9.9453	24.8633	4.97265	0.142	2	5
13	6	0.1444	27.7008	0.0841413	13.8504	6.92521	6.92521	0.08785	2	1
13	6	0.2896	13.8122	0.0562845	20.7182	6.90608	10.3591	0.01905	6	2
13	6	0.1512	26.455	0.131283	13.2275	6.61376	13.2275	0.06455	2	1
13	6	0.38505	7.7912	0.0162317	18.1795	31.1648	23.3736	0.0155	7	12
13	6	0.276	21.7391	0.258514	18.1159	7.24638	10.8696	0.0099	5	2
13	6	0.1499	33.3556	0.0963976	6.67111	13.3422	40.0267	0.0446	1	2
13	6	0.48315	16.558	0.105557	14.4883	14.4883	16.558	0.00555	7	7
13	6	0.3789	13.1961	0.0603061	10.5569	18.4745	26.3922	0.00725	4	7
13	6	0.23185	21.5657	0.190856	25.8788	8.62627	25.8788	0.02125	6	2
13	6	0.1527	26.1952	0.123117	13.0976	19.6464	19.6464	0.0831	2	3
13	6	0.1008	29.7619	0.0873016	29.7619	29.7619	0	0.20115	3	3
13	6	0.37995	15.7916	0.0684301	13.1596	13.1596	18.4235	0.10445	5	5
13	6	0.164	24.3902	0.109146	6.09756	6.09756	12.1951	0.0206	1	1
13	6	0.2717	18.4026	0.0125138	18.4026	11.0416	3.68053	0.17565	5	3
13	6	0.1347	29.6956	0.0812918	29.6956	7.4239	29.6956	0.0162	4	1
13	6	0.4614	13.0039	0.0359775	17.3385	17.3385	19.5059	0.04405	8	8
13	6	0.2175	22.9885	0.082069	22.9885	9.1954	4.5977	0.1721	5	2
13	6	0.16155	30.9502	0.0897555	18.5701	18.5701	6.19003	0.13985	3	3
13	6	0.2429	24.7015	0.0771923	28.8184	4.11692	16.4677	0.17125	7	1
13	6	0.274	21.8978	0.216788	14.5985	14.5985	14.5985	0.0085	4	4
13	6	0.24345	24.6457	0.106182	0	0	4.10762	0.1999	0	0
13	6	0.4729	16.9169	0.15479	16.9169	10.5731	21.1461	0.00305	8	5
13	6	0.33925	26.5291	0.154606	8.84304	0	11.7907	0.2121	3	0
13	6	0.374	10.6952	0.040107	8.02139	2.6738	2.6738	0.36355	3	1
13	6	0.1733	23.0814	0.134449	5.77034	0	0	0.2969	1	0
13	6	0.2313	21.6169	0.128621	17.2936	4.32339	12.9702	0.15305	4	1
13	6	0.39045	15.3669	0.0385453	5.12229	0	15.3669	0.02355	2	0
13	6	0.13125	30.4762	0.0540952	7.61905	7.61905	7.61905	0.09325	1	1
13	6	0.42325	14.176	0.0870644	7.08801	2.36267	14.176	0.11735	3	1
13	6	0.30505	22.9471	0.183904	9.83445	3.27815	13.1126	0.0477	3	1
13	6	0.33995	17.6497	0.107222	2.94161	0	8.82483	0.2023	1	0
13	6	0.2442	24.57	0.101966	0	0	8.19001	0.20035	0	0
13	6	0.37965	15.804	0.136573	13.17	0	15.804	0.0053	5	0
13	6	0.2158	23.1696	0.184662	13.9018	9.26784	9.26784	0.1982	3	2
13	6	0.1683	23.7671	0.154486	17.8253	5.94177	5.94177	0.16305	3	1
13	6	0.233	21.4592	0.163734	12.8755	0	0	0.3005	3	0
13	6	0.29815	13.4161	0.0405836	10.062	3.35402	16.7701	0.0714	3	1
13	6	0.606	11.5512	0.0522277	13.2013	9.90099	16.5017	0.01105	8	6
13	6	0.2372	21.0793	0.110455	12.6476	0	12.6476	0.1081	3	0
13	6	0.2142	23.3427	0.0992063	0	9.33707	4.66853	0.21275	0	2
13	6	0.19945	25.0689	0.213086	15.0414	0	10.0276	0.1599	3	0
13	6	0.27335	25.6082	0.179074	0	0	10.9749	0.1952	0	0
13	6	0.23375	21.3904	0.105668	4.27807	0	17.1123	0.12555	1	0
13	6	0.2469	24.3013	0.170109	8.10045	0	8.10045	0.1688	2	0
13	6	0.28945	13.8193	0.0217654	6.90966	6.90966	10.3645	0.0231	2	2
13	6	0.3993	17.5307	0.0435763	15.0263	12.5219	15.0263	0.1007	6	5
13	6	0.36375	19.244	0.0523711	16.4948	0	19.244	0.04255	6	0
13	6	0.18455	27.0929	0.20699	27.0929	5.41859	0	0.2092	5	1
13	6	0.3532	22.6501	0.223952	25.4813	5.66251	16.9875	0.05945	9	2
13	6	0.15555	19.2864	0.045323	6.4288	12.8576	12.8576	0.0188	1	2
13	6	0.8593	11.6374	0.0570813	9.3099	20.9473	11.6374	0.002	8	18
13	6	0.09995	30.015	0.034017	0	20.01	0	0.3416	0	2
13	6	0.3106	12.8783	0.037991	22.537	22.537	28.9762	0.0224	7	7
13	6	0.1992	25.1004	0.0742972	35.1406	15.0602	10.0402	0.14605	7	3
13	6	0.18435	16.2734	0.0227828	32.5468	16.2734	16.2734	0.0808	6	3
13	6	0.4162	14.4161	0.1247	0	9.61076	19.2215	0.04035	0	4
13	6	0.18675	26.7738	0.0746988	5.35475	16.0643	10.7095	0.14005	1	3
13	6	0.6148	13.0124	0.0991379	16.2655	4.87964	16.2655	0.0443	10	3
13	6	0.42315	16.5426	0.169207	21.2691	9.45291	18.9058	0.0668	9	4
13	6	0.18255	27.3898	0.048206	16.4339	0	21.9118	0.0894	3	0
13	6	0.1525	26.2295	0.139016	6.55738	0	0	0.19265	1	0
13	6	0.24745	16.1649	0.0242473	16.1649	0	24.2473	0.0846	4	0
13	6	0.1753	28.5225	0.0998289	0	17.1135	0	0.21645	0	3
13	6	0.2901	13.7883	0.0349879	10.3413	0	20.6825	0.11285	3	0
13	6	0.2086	23.9693	0.183605	19.1755	0	9.58773	0.1688	4	0
13	6	0.10605	37.7181	0.0443187	37.7181	9.42951	9.42951	0.08235	4	1
13	6	0.1301	23.0592	0.0203689	0	15.3728	0	0.1362	0	2
13	6	0.2169	23.0521	0.116413	9.22084	18.4417	36.8834	0.0231	2	4
13	6	0.2351	25.5211	0.202254	21.2675	0	17.014	0.02755	5	0
13	6	0.20225	24.7219	0.110012	34.6106	9.88875	24.7219	0.05465	7	2
13	6	0.5293	13.225	0.0983374	18.8929	17.0036	20.7822	0.0406	10	9
13	6	0.2764	21.7077	0.224132	14.4718	3.61795	21.7077	0.001	4	1
13	6	0.17605	22.7208	0.160182	11.3604	5.6802	39.7614	0.02345	2	1
13	6	0.14905	20.1275	0.0325394	33.5458	26.8366	46.9641	0.0197	5	4
13	6	0.273	21.978	0.164835	3.663	7.32601	32.967	0.01235	1	2
13	6	0.33235	18.0533	0.081691	12.0355	6.01775	18.0533	0.04765	4	2
13	6	0.06025	49.7925	0.019917	0	33.195	16.5975	0.00125	0	2
13	6	0.32445	9.24642	0.00369857	15.4107	24.6571	18.4928	0.07035	5	8
13	6	0.3116	16.0462	0.0691592	19.2555	22.4647	22.4647	0.1275	6	7
13	6	0.3842	18.2197	0.107626	31.2337	18.2197	5.20562	0.0561	12	7
13	6	0.1039	28.8739	0.078922	9.62464	9.62464	9.62464	0.0066	1	1
13	6	0.38245	15.6883	0.158975	10.4589	0	23.5325	0.09895	4	0
13	6	0.1854	26.9687	0.116235	43.1499	0	5.39374	0.1806	8	0
13	6	0.54655	14.6373	0.137682	18.2966	18.2966	12.8076	0.0128	10	10
13	6	0.24075	12.4611	0.003946	12.4611	12.4611	20.7684	0.0036	3	3
13	6	0.37085	21.5721	0.167049	18.8756	10.786	24.2686	0.1266	7	4
13	6	0.2818	17.7431	0.0920866	10.6458	7.09723	17.7431	0.0435	3	2
13	6	0.24735	12.1286	0.0264807	24.2571	16.1714	16.1714	0.099	6	4
13	6	0.342	17.5439	0.0903509	20.4678	11.6959	20.4678	0.05835	7	4
13	6	0.17115	23.3713	0.0809232	17.5285	0	17.5285	0.03305	3	0
13	6	0.36255	16.5494	0.0635774	19.3077	22.0659	33.0989	0.03435	7	8
13	6	0.2083	24.0038	0.134662	19.2031	14.4023	4.80077	0.0508	4	3
13	6	0.44195	9.0508	0.0348456	13.5762	20.3643	18.1016	0.0042	6	9
13	6	0.21045	23.7586	0.105251	23.7586	14.2552	47.5172	0.02305	5	3
13	6	0.62615	14.3736	0.0879182	23.9559	19.1647	22.3589	0.0573	15	12
13	6	0.3212	21.7933	0.135741	31.1333	9.33998	21.7933	0.07955	10	3
13	6	0.1597	18.7852	0.0591735	12.5235	12.5235	0	0.1609	2	2
13	6	0.0907	33.0761	0.0578831	11.0254	22.0507	0	0.10385	1	2
13	6	0.35425	11.2915	0.00875088	19.7601	25.4058	16.9372	0.06815	7	9
13	6	0.62515	12.7969	0.0531872	22.3946	9.5977	27.1935	0.09735	14	6
13	6	0.30835	9.7292	0.0299984	12.9723	29.1876	19.4584	0.00855	4	9
13	6	0.96505	12.4346	0.0933112	18.6519	25.9054	15.5432	0.07085	18	25
13	6	0.1726	17.3812	0.0312862	34.7625	17.3812	11.5875	0.0159	6	3
13	6	0.4046	19.7726	0.13742	12.3579	14.8295	32.1305	0.0494	5	6
13	6	0.52965	15.1043	0.147739	15.1043	13.2163	24.5445	0.0138	8	7
13	6	0.392	17.8571	0.0702806	22.9592	12.7551	20.4082	0.013	9	5
13	6	0.2516	19.8728	0.112281	47.6948	7.94913	15.8983	0.04805	12	2
13	6	0.2591	19.2976	0.0959089	30.8761	23.1571	23.1571	0.02135	8	6
13	6	0.0685	43.7956	0.050365	14.5985	14.5985	14.5985	0.06235	1	1
13	6	0.67035	14.9176	0.123667	23.8681	19.3929	17.9011	0.0093	16	13
13	6	0.1521	26.2985	0.115713	13.1492	6.57462	13.1492	0.0356	2	1
13	6	0.12105	24.7831	0.142503	16.5221	0	24.7831	0.03905	2	0
13	6	0.24825	24.1692	0.252568	20.141	0	20.141	0.04695	5	0
13	6	0.1197	25.0627	0.111529	25.0627	33.4169	8.35422	0.0253	3	4
13	6	0.4009	9.97755	0.0246944	19.9551	12.4719	17.4607	0.0001	8	5
13	6	0.23	17.3913	0.0686957	30.4348	21.7391	21.7391	0.10805	7	5
13	6	0.2601	23.0681	0.189927	11.534	7.68935	26.9127	0.04985	3	2
13	6	0.2409	20.7555	0.201951	20.7555	0	12.4533	0.1035	5	0
13	6	0.39505	17.7193	0.136692	25.3133	10.1253	20.2506	0.18025	10	4
13	6	0.2302	21.7202	0.25695	13.0321	4.34405	26.0643	0.0206	3	1
13	6	0.24945	16.0353	0.0903989	28.0617	16.0353	20.0441	0.08425	7	4
13	6	0.27445	10.931	0.00637639	21.8619	14.5746	18.2183	0.0651	6	4
13	6	0.4938	14.1758	0.054678	14.1758	12.1507	24.3013	0.0499	7	6
13	6	0.34555	14.4697	0.0279265	8.68181	8.68181	40.5151	0.0287	3	3
13	6	0.7316	12.3018	0.124317	17.7693	21.8699	20.503	0.03605	13	16
13	6	0.145	20.6897	0.0210345	20.6897	13.7931	20.6897	0.0409	3	2
13	6	0.74585	12.0668	0.0404237	2.6815	8.04451	21.452	0.0657	2	6
13	6	0.56725	14.1031	0.0588806	21.1547	15.866	10.5773	0.02435	12	9
13	6	0.4359	9.17642	0.0240881	11.4705	13.7646	20.6469	0.0691	5	6
13	6	0.2741	21.8898	0.138088	29.1864	18.2415	32.8347	0.0998	8	5
13	6	0.34295	14.5794	0.13034	14.5794	11.6635	20.4111	0.06985	5	4
13	6	0.382	7.8534	0.0149215	13.089	26.178	26.178	0.0266	5	10
13	6	0.30105	26.5737	0.142169	16.6085	9.96512	26.5737	0.015	5	3
13	6	0.11445	26.2123	0.0650939	34.9498	0	26.2123	0.01605	4	0
13	6	0.2684	11.1773	0.00279434	18.6289	14.9031	7.45156	0.1805	5	4
13	6	0.08165	36.7422	0.0661359	36.7422	0	0	0.09185	3	0
13	6	0.6359	15.7257	0.0923887	22.016	11.008	15.7257	0.0136	14	7
13	6	0.2681	22.3797	0.193584	22.3797	7.4599	22.3797	0.1079	6	2
13	6	0.20515	14.6234	0.0472825	19.4979	14.6234	9.74896	0.0328	4	3
13	6	0.0876	34.2466	0.0456621	0	34.2466	68.4932	0.01085	0	3
13	6	0.333	18.018	0.0635135	30.03	30.03	27.027	0.0509	10	10
13	6	0.6029	14.9278	0.130536	28.197	21.5624	31.5143	0.0223	17	13
13	6	0.197	15.2284	0.00177665	25.3807	25.3807	40.6091	0.0256	5	5
13	6	0.2118	14.1643	0.0533522	28.3286	28.3286	23.6072	0.04025	6	6
13	6	0.0908	33.0396	0.0688326	11.0132	22.0264	11.0132	0.0758	1	2
13	6	0.2418	16.5426	0.0632754	28.9495	28.9495	16.5426	0.01835	7	7
[truncated: 445 more rows]

## Sheet: Pachon_ablation
Fish ID	Age (dpf)	Swim Duration (s)	Swim Frequency (Hz)	Swim Duty Cycle	Aff Spike Rate-pre	Aff Spike Rate-swim	Aff Spike Rate-post	Refractory Period (s)	Spike Number-pre	Spike Number-swim
[truncated: 2,564 more rows]

[truncated: 3 more sheets: Surface_evoked, Pachon_evoked, hair cell count]
